# Supplementary material for: Deciphering Cell Fate and Clonal Dynamics via Integrative Single-Cell Lineage Modeling
Source: Research Square preprint supplement (doi:10.21203/rs.3.rs-7510946/v1), 2025-09-24
Supplement: Supplementary file 1 [file 6771e2190164cf0e01759d3b.xlsx]

## Sheet: Sheet1
Description: This table collects tumor-reactive gens and virus-reactive genes for the module score
gene	type
ENTPD1	tumor
ITGAE	tumor
PDCD1	tumor
TNFRSF9	tumor
TNFRSF4	tumor
CXCL13	tumor
MKI67	tumor
HAVCR2	tumor
LAG3	tumor
ATP10D	tumor
GZMB	tumor
KIR2DL4	tumor
LAYN	tumor
HTRA1	tumor
CD70	tumor
CXCR6	tumor
HMOX1	tumor
ADGRG1	tumor
LRRN3	tumor
ACP5	tumor
CTSW	tumor
GALNT2	tumor
LINC01480	tumor
CARS	tumor
TOX	tumor
PTPRCAP	tumor
ASB2	tumor
ITGB7	tumor
PTMS	tumor
CD8A	tumor
GPR68	tumor
NSMCE1	tumor
ABI3	tumor
SLC1A4	tumor
PLEKHF1	tumor
CD8B	tumor
LINC01871	tumor
CCL4	tumor
NKG7	tumor
CLIC3	tumor
NDFIP2	tumor
PLPP1	tumor
PCED1B	tumor
PRF1	tumor
HLA-DMA	tumor
GPR25	tumor
CD9	tumor
TIGIT	tumor
HLA-DRB5	tumor
SYTL3	tumor
SLF1	tumor
NEK1	tumor
CASP1	tumor
SMC4	tumor
TSEN54	tumor
PLSCR1	tumor
GNPTAB	tumor
HLA-DPB1	tumor
PLEKHA1	tumor
ARHGAP9	tumor
ALOX5AP	tumor
SH3BP1	tumor
NCF4	tumor
NELL2	tumor
GATA3	tumor
PPM1M	tumor
TNFRSF1A	tumor
AC022706.1	tumor
MCM5	tumor
HLA-DRB1	tumor
TNFSF10	tumor
TRIM21	tumor
HDLBP	tumor
ERN1	tumor
CALHM2	tumor
SASH3	tumor
ACTA2	tumor
MAST4	tumor
CAPG	tumor
MPST	tumor
IGFLR1	tumor
GZMA	tumor
CD27	tumor
SLA2	tumor
RHOC	tumor
COMMD8	tumor
MYO1G	tumor
SP140	tumor
PHPT1	tumor
CD2BP2	tumor
PLEKHO1	tumor
STAM	tumor
MRPL16	tumor
IL2RB	tumor
ID2	tumor
TESPA1	tumor
GOLGA8B	tumor
MIS18BP1	tumor
VAMP5	tumor
DAPK2	tumor
HLA-DPA1	tumor
TSG101	tumor
IL4R	tumor
CCND2	tumor
CTSC	tumor
TRAF3IP3	tumor
NLRC3	tumor
ORAI3	tumor
GNLY	tumor
MIR155HG	tumor
CARD16	tumor
CD82	tumor
ECH1	tumor
JAML	tumor
EEF1G	tumor
ETFB	tumor
DAXX	tumor
RBM4	tumor
HCST	tumor
RAB27A	tumor
YPEL2	tumor
CHST12	tumor
ARPC1B	tumor
PDIA4	tumor
PDIA6	tumor
AC243960.1	tumor
TBC1D10C	tumor
PTPN6	tumor
PYCARD	tumor
BST2	tumor
BTN3A2	tumor
MTG1	tumor
MLEC	tumor
DUSP4	tumor
GSDMD	tumor
SLAMF1	tumor
IFI6	tumor
PCID2	tumor
GIMAP1	tumor
ITGA1	tumor
CSNK2B	tumor
CDK2AP2	tumor
MYO1F	tumor
AC004687.1	tumor
PTTG1	tumor
APOBEC3C	tumor
TSPAN14	tumor
MOB3A	tumor
STXBP2	tumor
LCP2	tumor
PLA2G16	tumor
LINC00649	tumor
CST7	tumor
TADA3	tumor
SIT1	tumor
APOBEC3G	tumor
SUSD3	tumor
CD3G	tumor
CCL5	tumor
CDC25B	tumor
TNFRSF1B	tumor
HMGN3	tumor
THEMIS	tumor
ASF1A	tumor
CTNNB1	tumor
FIBP	tumor
CCDC85B	tumor
POLR3GL	tumor
GIMAP6	tumor
ARL6IP1	tumor
CALCOCO2	tumor
CCPG1	tumor
KLRB1	tumor
ACAA2	tumor
ISG15	tumor
EIF4A1	tumor
CAT	tumor
MANF	tumor
XAB2	tumor
GRINA	tumor
GLO1	tumor
LSM2	tumor
SLFN5	tumor
FKBP1A	tumor
AKNA	tumor
TAP1	tumor
LMO4	tumor
APEH	tumor
C12orf75	tumor
TMEM14A	tumor
DNPH1	tumor
C17orf49	tumor
NUDT5	tumor
MGAT1	tumor
CCDC69	tumor
EIF4EBP1	tumor
PDHB	tumor
ARL3	tumor
UCP2	tumor
IFI35	tumor
HSBP1	tumor
LYST	tumor
MRFAP1L1	tumor
ITGAL	tumor
AIP	tumor
RASAL3	tumor
CAPN1	tumor
ITGB1	tumor
RBPJ	tumor
LBH	tumor
DYNLL1	tumor
NME2	tumor
MT1F	tumor
SYNGR2	tumor
ABTB1	tumor
ZGPAT	tumor
CD63	tumor
ILK	tumor
SKA2	tumor
TMEM204	tumor
ACO2	tumor
HOPX	tumor
CRIP1	tumor
OXNAD1	tumor
CCS	tumor
GRAP2	tumor
GSTO1	tumor
HADHB	tumor
IL16	tumor
PIN4	tumor
CUEDC2	tumor
CALM3	tumor
SAMSN1	tumor
HM13	tumor
SNAP23	tumor
LPCAT4	tumor
FAAP20	tumor
EFHD2	tumor
PRDX3	tumor
CCM2	tumor
C22orf39	tumor
SDHA	tumor
ARRDC1	tumor
MAP4K1	tumor
NDUFA13	tumor
IL27RA	tumor
C14orf119	tumor
KRT86	tumor
RDH10	tumor
TYMS	tumor
GNG4	tumor
AFAP1L2	tumor
MYO1E	tumor
TNS3	tumor
TNFSF4	tumor
AKAP5	tumor
SLC2A8	tumor
AC243829.4	tumor
ZBED2	tumor
CAV1	tumor
GOLIM4	tumor
TRAV21	tumor
VCAM1	tumor
PON2	tumor
MTSS1	tumor
CD38	tumor
TRBV11-2	tumor
MS4A6A	tumor
TOX2	tumor
CSF1	tumor
FXYD2	tumor
LMCD1	tumor
MYL6B	tumor
HLA-DRA	tumor
CCDC50	tumor
KIAA1324	tumor
CDKN2A	tumor
ABHD6	tumor
CTLA4	tumor
GEM	tumor
NUSAP1	tumor
NMB	tumor
INPP5F	tumor
SNAP47	tumor
TSHZ2	tumor
TUBB	tumor
HLA-DQA1	tumor
CKS1B	tumor
HIPK2	tumor
LSP1	tumor
FAM3C	tumor
NUDT1	tumor
IFNG	tumor
MIR4435-2HG	tumor
CCL3	tumor
HLA-DQB1	tumor
RARA	virus
GADD45B	virus
C1orf21	virus
AOAH	virus
MATK	virus
SATB1	virus
MBP	virus
ANTXR2	virus
RORA	virus
CCR7	virus
ANXA1	virus
BACH2	virus
GLUL	virus
TNFSF14	virus
AUTS2	virus
PERP	virus
EPHA4	virus
TCF7	virus
SELL	virus
MYC	virus
IL7R	virus
CD300A	virus
ITGA5	virus
GPR183	virus
KLF3	virus
S1PR1	virus
KLRC1	virus
GPR15	virus
ARL4A	virus
PTGER2	virus
PIK3R1	virus
LYAR	virus
NUDT11	virus
CCND3	virus
CLDND1	virus
YPEL5	virus
