# Supplementary material for: Deciphering Cell Fate and Clonal Dynamics via Integrative Single-Cell Lineage Modeling
Source: Research Square preprint supplement (doi:10.21203/rs.3.rs-7510946/v1), 2025-09-24
Supplement: Supplementary file 2 [file 7391247af1facfb7f094c881.xlsx]

## Sheet: profile 1 vs 8
Description: This table records the significant differentially expressed genes between profile 1 and profile 8
obs.x	obs.y	obs.tot	statistic	pvalue	location.null	alternative	exact	corrected	qvalue	logFC	gene
AL669831.5	1037	4313	5350	2.27199e+06	0.0275731	0	two.sided	FALSE	TRUE	0.0718427	0.4731	AL669831.5
LINC00115	1037	4313	5350	2246871	0.282212	0	two.sided	FALSE	TRUE	0.427139	0.41877	LINC00115
NOC2L	1037	4313	5350	2142069	0.000347625	0	two.sided	FALSE	TRUE	0.00171282	-0.542783	NOC2L
KLHL17	1037	4313	5350	2235858	0.972092	0	two.sided	FALSE	TRUE	0.983391	-0.0456334	KLHL17
HES4	1037	4313	5350	2.30372e+06	2.01396e-11	0	two.sided	FALSE	TRUE	3.23388e-10	1.93756	HES4
ISG15	1037	4313	5350	2.29141e+06	0.097539	0	two.sided	FALSE	TRUE	0.192568	0.222384	ISG15
C1orf159	1037	4313	5350	2.19075e+06	0.000447909	0	two.sided	FALSE	TRUE	0.00214173	-1.33768	C1orf159
SDF4	1037	4313	5350	2.07007e+06	7.16264e-07	0	two.sided	FALSE	TRUE	6.29207e-06	-0.51022	SDF4
B3GALT6	1037	4313	5350	2149600	3.0835e-08	0	two.sided	FALSE	TRUE	3.34406e-07	-2.14105	B3GALT6
UBE2J2	1037	4313	5350	2.13469e+06	3.52553e-05	0	two.sided	FALSE	TRUE	0.000225534	-0.682214	UBE2J2
ACAP3	1037	4313	5350	2.22877e+06	0.652316	0	two.sided	FALSE	TRUE	0.761164	-0.114422	ACAP3
PUSL1	1037	4313	5350	2.22036e+06	0.203067	0	two.sided	FALSE	TRUE	0.336777	-0.486378	PUSL1
INTS11	1037	4313	5350	2.16157e+06	0.0100333	0	two.sided	FALSE	TRUE	0.0313091	-0.328956	INTS11
CPTP	1037	4313	5350	2.21734e+06	0.181058	0	two.sided	FALSE	TRUE	0.309033	-0.410419	CPTP
DVL1	1037	4313	5350	2.23702e+06	0.953501	0	two.sided	FALSE	TRUE	0.971606	0.00457409	DVL1
AURKAIP1	1037	4313	5350	2069744	7.42342e-06	0	two.sided	FALSE	TRUE	5.5233e-05	-0.357286	AURKAIP1
CCNL2	1037	4313	5350	2.25334e+06	0.556962	0	two.sided	FALSE	TRUE	0.682286	0.0887463	CCNL2
MRPL20	1037	4313	5350	2098614	1.20258e-05	0	two.sided	FALSE	TRUE	8.53675e-05	-0.516854	MRPL20
ATAD3B	1037	4313	5350	2220556	0.341532	0	two.sided	FALSE	TRUE	0.487848	-0.252492	ATAD3B
ATAD3A	1037	4313	5350	2214017	0.0673415	0	two.sided	FALSE	TRUE	0.14473	-0.552488	ATAD3A
SSU72	1037	4313	5350	2.08249e+06	5.21135e-05	0	two.sided	FALSE	TRUE	0.000321082	-0.314424	SSU72
AL645728.1	1037	4313	5350	2232866	0.721787	0	two.sided	FALSE	TRUE	0.815573	-0.137023	AL645728.1
FNDC10	1037	4313	5350	2238763	0.79595	0	two.sided	FALSE	TRUE	0.868463	0.146836	FNDC10
AL691432.2	1037	4313	5350	2251883	0.134729	0	two.sided	FALSE	TRUE	0.246361	0.530361	AL691432.2
MIB2	1037	4313	5350	2.24211e+06	0.845057	0	two.sided	FALSE	TRUE	0.903706	-0.00856484	MIB2
MMP23B	1037	4313	5350	2135809	1.71512e-05	0	two.sided	FALSE	TRUE	0.000118108	-0.795394	MMP23B
CDK11B	1037	4313	5350	2.28975e+06	0.0369622	0	two.sided	FALSE	TRUE	0.0909954	0.248033	CDK11B
SLC35E2B	1037	4313	5350	2.17562e+06	0.00160539	0	two.sided	FALSE	TRUE	0.00651274	-0.708563	SLC35E2B
CDK11A	1037	4313	5350	2.31517e+06	0.0193375	0	two.sided	FALSE	TRUE	0.053616	0.180393	CDK11A
SLC35E2A	1037	4313	5350	2.23105e+06	0.664621	0	two.sided	FALSE	TRUE	0.770913	-0.116105	SLC35E2A
NADK	1037	4313	5350	2.18375e+06	0.00940245	0	two.sided	FALSE	TRUE	0.0297161	-0.531309	NADK
GNB1	1037	4313	5350	2.10401e+06	0.000712118	0	two.sided	FALSE	TRUE	0.00319005	-0.245802	GNB1
PRKCZ	1037	4313	5350	2.24265e+06	0.682004	0	two.sided	FALSE	TRUE	0.784138	0.0905695	PRKCZ
FAAP20	1037	4313	5350	2200630	0.296994	0	two.sided	FALSE	TRUE	0.443223	-0.11325	FAAP20
SKI	1037	4313	5350	2250690	0.378717	0	two.sided	FALSE	TRUE	0.525154	0.197502	SKI
RER1	1037	4313	5350	2067766	6.92712e-08	0	two.sided	FALSE	TRUE	7.13163e-07	-0.632589	RER1
PEX10	1037	4313	5350	2.22504e+06	0.3259	0	two.sided	FALSE	TRUE	0.472406	-0.233336	PEX10
PLCH2	1037	4313	5350	2252643	0.150041	0	two.sided	FALSE	TRUE	0.267374	0.429138	PLCH2
PANK4	1037	4313	5350	2217112	0.158689	0	two.sided	FALSE	TRUE	0.279515	-0.449783	PANK4
AL139246.5	1037	4313	5350	2.23888e+06	0.912652	0	two.sided	FALSE	TRUE	0.945962	0.0535379	AL139246.5
TNFRSF14-AS1	1037	4313	5350	2.25936e+06	0.0276422	0	two.sided	FALSE	TRUE	0.0719503	0.707078	TNFRSF14-AS1
TNFRSF14	1037	4313	5350	2092366	0.000308087	0	two.sided	FALSE	TRUE	0.00153406	-0.237533	TNFRSF14
FAM213B	1037	4313	5350	2.2221e+06	0.128239	0	two.sided	FALSE	TRUE	0.237215	-0.676922	FAM213B
MEGF6	1037	4313	5350	2259453	0.000797841	0	two.sided	FALSE	TRUE	0.00351627	1.35977	MEGF6
TPRG1L	1037	4313	5350	2.16839e+06	0.0183544	0	two.sided	FALSE	TRUE	0.0513775	-0.272567	TPRG1L
WRAP73	1037	4313	5350	2.21114e+06	0.221111	0	two.sided	FALSE	TRUE	0.358942	-0.250002	WRAP73
LRRC47	1037	4313	5350	2186639	0.0344795	0	two.sided	FALSE	TRUE	0.0860957	-0.351648	LRRC47
CEP104	1037	4313	5350	2.22132e+06	0.459289	0	two.sided	FALSE	TRUE	0.600538	-0.148623	CEP104
DFFB	1037	4313	5350	2215071	0.0791873	0	two.sided	FALSE	TRUE	0.163963	-0.549138	DFFB
C1orf174	1037	4313	5350	2.2225e+06	0.599312	0	two.sided	FALSE	TRUE	0.718162	-0.119291	C1orf174
KCNAB2	1037	4313	5350	2.04787e+06	2.29384e-08	0	two.sided	FALSE	TRUE	2.53818e-07	-0.564551	KCNAB2
RPL22	1037	4313	5350	2516205	2.85902e-10	0	two.sided	FALSE	TRUE	4.06743e-09	0.0859277	RPL22
ICMT	1037	4313	5350	2206422	0.0281523	0	two.sided	FALSE	TRUE	0.0730759	-0.731545	ICMT
GPR153	1037	4313	5350	2.23219e+06	0.557707	0	two.sided	FALSE	TRUE	0.682924	-0.383553	GPR153
ACOT7	1037	4313	5350	2201551	0.0290683	0	two.sided	FALSE	TRUE	0.0749739	-0.606618	ACOT7
TNFRSF25	1037	4313	5350	2.33224e+06	3.33487e-08	0	two.sided	FALSE	TRUE	3.5941e-07	0.997378	TNFRSF25
NOL9	1037	4313	5350	2235766	0.980671	0	two.sided	FALSE	TRUE	0.987798	0.0379796	NOL9
ZBTB48	1037	4313	5350	2.23147e+06	0.761572	0	two.sided	FALSE	TRUE	0.843407	-0.0993731	ZBTB48
KLHL21	1037	4313	5350	2250770	0.310613	0	two.sided	FALSE	TRUE	0.456444	0.280877	KLHL21
PHF13	1037	4313	5350	2219179	0.0418777	0	two.sided	FALSE	TRUE	0.10014	-1.104	PHF13
THAP3	1037	4313	5350	2236418	0.992635	0	two.sided	FALSE	TRUE	0.996001	-0.0253224	THAP3
DNAJC11	1037	4313	5350	2.19505e+06	0.0148724	0	two.sided	FALSE	TRUE	0.0435737	-0.641679	DNAJC11
CAMTA1	1037	4313	5350	2438267	8.78087e-12	0	two.sided	FALSE	TRUE	1.45977e-10	0.656833	CAMTA1
VAMP3	1037	4313	5350	2.27892e+06	0.0509559	0	two.sided	FALSE	TRUE	0.116501	0.348776	VAMP3
PER3	1037	4313	5350	2252567	0.151948	0	two.sided	FALSE	TRUE	0.270076	0.358309	PER3
UTS2	1037	4313	5350	2.19102e+06	0.0010019	0	two.sided	FALSE	TRUE	0.0043021	-1.16056	UTS2
TNFRSF9	1037	4313	5350	2.23993e+06	0.790882	0	two.sided	FALSE	TRUE	0.864776	0.128968	TNFRSF9
PARK7	1037	4313	5350	1.89839e+06	1.46489e-16	0	two.sided	FALSE	TRUE	3.61234e-15	-0.503008	PARK7
ERRFI1	1037	4313	5350	2253243	0.0298057	0	two.sided	FALSE	TRUE	0.0764672	0.902676	ERRFI1
SLC45A1	1037	4313	5350	2231239	0.501571	0	two.sided	FALSE	TRUE	0.636615	-0.402168	SLC45A1
RERE	1037	4313	5350	2298714	0.005206	0	two.sided	FALSE	TRUE	0.0178953	0.446231	RERE
ENO1	1037	4313	5350	1.73779e+06	1.46266e-34	0	two.sided	FALSE	TRUE	1.1305e-32	-0.842746	ENO1
H6PD	1037	4313	5350	2206518	0.0755752	0	two.sided	FALSE	TRUE	0.158064	-0.416546	H6PD
SPSB1	1037	4313	5350	2.22649e+06	0.209316	0	two.sided	FALSE	TRUE	0.344765	-0.726658	SPSB1
SLC25A33	1037	4313	5350	2286276	0.00731835	0	two.sided	FALSE	TRUE	0.0240043	0.442946	SLC25A33
TMEM201	1037	4313	5350	2235626	0.933935	0	two.sided	FALSE	TRUE	0.959695	-0.090574	TMEM201
PIK3CD	1037	4313	5350	2238198	0.948806	0	two.sided	FALSE	TRUE	0.968625	0.00955914	PIK3CD
CLSTN1	1037	4313	5350	2.1082e+06	9.34704e-06	0	two.sided	FALSE	TRUE	6.83185e-05	-0.58968	CLSTN1
CTNNBIP1	1037	4313	5350	2.22504e+06	0.506587	0	two.sided	FALSE	TRUE	0.640625	-0.099352	CTNNBIP1
LZIC	1037	4313	5350	2.19722e+06	0.0520588	0	two.sided	FALSE	TRUE	0.1185	-0.350152	LZIC
UBE4B	1037	4313	5350	2.21832e+06	0.422096	0	two.sided	FALSE	TRUE	0.566716	-0.148909	UBE4B
KIF1B	1037	4313	5350	2251638	0.331014	0	two.sided	FALSE	TRUE	0.477348	0.167064	KIF1B
PGD	1037	4313	5350	2.22718e+06	0.649989	0	two.sided	FALSE	TRUE	0.75914	-0.12137	PGD
DFFA	1037	4313	5350	2193928	0.022644	0	two.sided	FALSE	TRUE	0.0612814	-0.51514	DFFA
PEX14	1037	4313	5350	2.20239e+06	0.0328197	0	two.sided	FALSE	TRUE	0.0827571	-0.516859	PEX14
CASZ1	1037	4313	5350	2.28702e+06	0.00957581	0	two.sided	FALSE	TRUE	0.0301787	0.483012	CASZ1
TARDBP	1037	4313	5350	2241070	0.767138	0	two.sided	FALSE	TRUE	0.847855	0.100668	TARDBP
SRM	1037	4313	5350	2084077	9.77399e-06	0	two.sided	FALSE	TRUE	7.09883e-05	-0.442152	SRM
EXOSC10	1037	4313	5350	2197154	0.157528	0	two.sided	FALSE	TRUE	0.278037	-0.16498	EXOSC10
MTOR	1037	4313	5350	2173620	0.00257113	0	two.sided	FALSE	TRUE	0.00981902	-0.628802	MTOR
UBIAD1	1037	4313	5350	2240247	0.849546	0	two.sided	FALSE	TRUE	0.905967	0.0768045	UBIAD1
FBXO2	1037	4313	5350	2.20271e+06	0.00183591	0	two.sided	FALSE	TRUE	0.00733586	-1.59714	FBXO2
FBXO44	1037	4313	5350	2.2064e+06	0.213499	0	two.sided	FALSE	TRUE	0.349819	-0.200815	FBXO44
FBXO6	1037	4313	5350	2164512	0.000400844	0	two.sided	FALSE	TRUE	0.00194088	-0.708082	FBXO6
MAD2L2	1037	4313	5350	2.22006e+06	0.595565	0	two.sided	FALSE	TRUE	0.714913	-0.0670178	MAD2L2
AGTRAP	1037	4313	5350	2030149	3.85499e-12	0	two.sided	FALSE	TRUE	6.58848e-11	-0.907722	AGTRAP
MTHFR	1037	4313	5350	2218884	0.168653	0	two.sided	FALSE	TRUE	0.29299	-0.473653	MTHFR
CLCN6	1037	4313	5350	2218825	0.160126	0	two.sided	FALSE	TRUE	0.281136	-0.480595	CLCN6
KIAA2013	1037	4313	5350	2.08796e+06	1.11906e-09	0	two.sided	FALSE	TRUE	1.46896e-08	-1.09233	KIAA2013
PLOD1	1037	4313	5350	2.19785e+06	0.00372733	0	two.sided	FALSE	TRUE	0.0134462	-0.980133	PLOD1
MFN2	1037	4313	5350	2233400	0.846395	0	two.sided	FALSE	TRUE	0.904468	-0.0252654	MFN2
MIIP	1037	4313	5350	2.21177e+06	0.336895	0	two.sided	FALSE	TRUE	0.483607	-0.141175	MIIP
TNFRSF1B	1037	4313	5350	2.19212e+06	0.211961	0	two.sided	FALSE	TRUE	0.348512	-0.110541	TNFRSF1B
VPS13D	1037	4313	5350	2.21855e+06	0.45103	0	two.sided	FALSE	TRUE	0.593698	-0.165952	VPS13D
DHRS3	1037	4313	5350	2.31426e+06	5.55941e-08	0	two.sided	FALSE	TRUE	5.81017e-07	1.22225	DHRS3
PRDM2	1037	4313	5350	2339443	0.00180692	0	two.sided	FALSE	TRUE	0.00723958	0.275824	PRDM2
EFHD2	1037	4313	5350	1661779	1.02585e-39	0	two.sided	FALSE	TRUE	9.83771e-38	-0.571107	EFHD2
CASP9	1037	4313	5350	2.24033e+06	0.764383	0	two.sided	FALSE	TRUE	0.845605	0.164368	CASP9
DNAJC16	1037	4313	5350	2.21417e+06	0.0534098	0	two.sided	FALSE	TRUE	0.12086	-0.776897	DNAJC16
AGMAT	1037	4313	5350	2.21556e+06	0.0191622	0	two.sided	FALSE	TRUE	0.0532072	-1.24105	AGMAT
DDI2	1037	4313	5350	2.29291e+06	0.000975594	0	two.sided	FALSE	TRUE	0.00420834	0.632634	DDI2
PLEKHM2	1037	4313	5350	2376466	9.83896e-07	0	two.sided	FALSE	TRUE	8.46363e-06	0.496426	PLEKHM2
UQCRHL	1037	4313	5350	2.20609e+06	0.0482926	0	two.sided	FALSE	TRUE	0.111782	-0.564137	UQCRHL
AL450998.2	1037	4313	5350	2.23059e+06	0.725835	0	two.sided	FALSE	TRUE	0.818541	-0.107156	AL450998.2
SPEN	1037	4313	5350	2231383	0.875912	0	two.sided	FALSE	TRUE	0.92212	-0.0228078	SPEN
ZBTB17	1037	4313	5350	2244232	0.676417	0	two.sided	FALSE	TRUE	0.779705	0.0811383	ZBTB17
ARHGEF19	1037	4313	5350	2.20928e+06	0.0156015	0	two.sided	FALSE	TRUE	0.0452491	-1.02642	ARHGEF19
FBXO42	1037	4313	5350	2.24301e+06	0.730634	0	two.sided	FALSE	TRUE	0.822609	0.108211	FBXO42
SZRD1	1037	4313	5350	2.32553e+06	0.00723046	0	two.sided	FALSE	TRUE	0.0237809	0.202699	SZRD1
NECAP2	1037	4313	5350	2.21819e+06	0.514322	0	two.sided	FALSE	TRUE	0.647481	-0.0774642	NECAP2
NBPF1	1037	4313	5350	2.21738e+06	0.132105	0	two.sided	FALSE	TRUE	0.242763	-0.445081	NBPF1
CROCC	1037	4313	5350	2.21947e+06	0.393241	0	two.sided	FALSE	TRUE	0.539443	-0.154816	CROCC
BX284668.5	1037	4313	5350	2230542	0.598894	0	two.sided	FALSE	TRUE	0.717827	-0.241095	BX284668.5
BX284668.6	1037	4313	5350	2.24942e+06	0.229465	0	two.sided	FALSE	TRUE	0.369791	0.474142	BX284668.6
ATP13A2	1037	4313	5350	2200866	0.0361189	0	two.sided	FALSE	TRUE	0.0893868	-0.555033	ATP13A2
SDHB	1037	4313	5350	2281394	0.123864	0	two.sided	FALSE	TRUE	0.231022	0.147929	SDHB
RCC2	1037	4313	5350	2.22125e+06	0.455159	0	two.sided	FALSE	TRUE	0.597173	-0.114932	RCC2
IFFO2	1037	4313	5350	2321768	0.000119567	0	two.sided	FALSE	TRUE	0.000666502	0.552706	IFFO2
UBR4	1037	4313	5350	2239556	0.911794	0	two.sided	FALSE	TRUE	0.945574	0.0279802	UBR4
EMC1	1037	4313	5350	2.19278e+06	0.00535541	0	two.sided	FALSE	TRUE	0.0183298	-0.840464	EMC1
MRTO4	1037	4313	5350	2.18755e+06	0.00304924	0	two.sided	FALSE	TRUE	0.011295	-0.781494	MRTO4
AKR7A2	1037	4313	5350	2.13267e+06	2.10857e-05	0	two.sided	FALSE	TRUE	0.000142085	-0.688623	AKR7A2
CAPZB	1037	4313	5350	1.77383e+06	3.65487e-27	0	two.sided	FALSE	TRUE	1.89268e-25	-0.488402	CAPZB
MINOS1	1037	4313	5350	2159943	0.00273918	0	two.sided	FALSE	TRUE	0.0103615	-0.449505	MINOS1
NBL1	1037	4313	5350	2.28127e+06	2.09097e-07	0	two.sided	FALSE	TRUE	2.0064e-06	1.68365	NBL1
TMCO4	1037	4313	5350	2221531	0.287383	0	two.sided	FALSE	TRUE	0.432604	-0.319267	TMCO4
OTUD3	1037	4313	5350	2.24741e+06	0.431637	0	two.sided	FALSE	TRUE	0.575794	0.207985	OTUD3
UBXN10-AS1	1037	4313	5350	2.23502e+06	0.869683	0	two.sided	FALSE	TRUE	0.918331	-0.166491	UBXN10-AS1
CAMK2N1	1037	4313	5350	2252357	0.469666	0	two.sided	FALSE	TRUE	0.609776	0.0997586	CAMK2N1
MUL1	1037	4313	5350	2259023	0.254961	0	two.sided	FALSE	TRUE	0.397446	0.183233	MUL1
PINK1	1037	4313	5350	2.18143e+06	0.000872679	0	two.sided	FALSE	TRUE	0.00380242	-0.964881	PINK1
DDOST	1037	4313	5350	1.906e+06	2.5453e-17	0	two.sided	FALSE	TRUE	6.7078e-16	-0.629093	DDOST
HP1BP3	1037	4313	5350	2073851	9.42293e-05	0	two.sided	FALSE	TRUE	0.000542486	-0.216946	HP1BP3
EIF4G3	1037	4313	5350	2128276	9.84903e-05	0	two.sided	FALSE	TRUE	0.000562329	-0.5618	EIF4G3
ECE1	1037	4313	5350	2226875	0.604083	0	two.sided	FALSE	TRUE	0.721708	-0.0623857	ECE1
NBPF3	1037	4313	5350	2.20213e+06	0.00455771	0	two.sided	FALSE	TRUE	0.0159743	-1.12453	NBPF3
USP48	1037	4313	5350	2255017	0.497578	0	two.sided	FALSE	TRUE	0.633098	0.0690122	USP48
CDC42	1037	4313	5350	2360588	0.00423732	0	two.sided	FALSE	TRUE	0.0149884	0.0962512	CDC42
ZBTB40	1037	4313	5350	2217771	0.284853	0	two.sided	FALSE	TRUE	0.429998	-0.266875	ZBTB40
KDM1A	1037	4313	5350	2213423	0.339373	0	two.sided	FALSE	TRUE	0.48575	-0.185169	KDM1A
LUZP1	1037	4313	5350	2.28587e+06	0.0252498	0	two.sided	FALSE	TRUE	0.0668488	0.320137	LUZP1
HNRNPR	1037	4313	5350	2167014	0.0762922	0	two.sided	FALSE	TRUE	0.159082	-0.121101	HNRNPR
RPL11	1037	4313	5350	2513022	5.55729e-10	0	two.sided	FALSE	TRUE	7.60328e-09	0.0427765	RPL11
ELOA	1037	4313	5350	2251077	0.523864	0	two.sided	FALSE	TRUE	0.655193	0.0937622	ELOA
PITHD1	1037	4313	5350	2368640	6.61327e-05	0	two.sided	FALSE	TRUE	0.000396146	0.400289	PITHD1
LYPLA2	1037	4313	5350	2.1222e+06	3.90994e-05	0	two.sided	FALSE	TRUE	0.00024848	-0.587537	LYPLA2
GALE	1037	4313	5350	2.20802e+06	0.00129913	0	two.sided	FALSE	TRUE	0.00540364	-2.36798	GALE
HMGCL	1037	4313	5350	2.20528e+06	0.00976746	0	two.sided	FALSE	TRUE	0.0306457	-1.03041	HMGCL
FUCA1	1037	4313	5350	2216447	0.0520853	0	two.sided	FALSE	TRUE	0.118508	-0.887577	FUCA1
CNR2	1037	4313	5350	2214481	0.0150848	0	two.sided	FALSE	TRUE	0.0440162	-1.43962	CNR2
PNRC2	1037	4313	5350	2530514	2.1257e-14	0	two.sided	FALSE	TRUE	4.50222e-13	0.470181	PNRC2
SRSF10	1037	4313	5350	2456697	1.3329e-08	0	two.sided	FALSE	TRUE	1.52203e-07	0.368558	SRSF10
IFNLR1	1037	4313	5350	2231802	0.644547	0	two.sided	FALSE	TRUE	0.754473	-0.219774	IFNLR1
NIPAL3	1037	4313	5350	2.23149e+06	0.78996	0	two.sided	FALSE	TRUE	0.864021	-0.0800808	NIPAL3
RCAN3	1037	4313	5350	2461922	2.42665e-35	0	two.sided	FALSE	TRUE	1.93329e-33	1.84798	RCAN3
SRRM1	1037	4313	5350	2593114	1.64781e-16	0	two.sided	FALSE	TRUE	4.05378e-15	0.307972	SRRM1
RUNX3	1037	4313	5350	2558170	3.07524e-15	0	two.sided	FALSE	TRUE	6.93905e-14	0.433568	RUNX3
AL050344.1	1037	4313	5350	2.23226e+06	0.667757	0	two.sided	FALSE	TRUE	0.77282	-0.178966	AL050344.1
SYF2	1037	4313	5350	2438902	3.74512e-07	0	two.sided	FALSE	TRUE	3.44172e-06	0.311978	SYF2
RSRP1	1037	4313	5350	2044174	5.52056e-06	0	two.sided	FALSE	TRUE	4.16738e-05	-0.225922	RSRP1
TMEM50A	1037	4313	5350	2.14891e+06	0.0309879	0	two.sided	FALSE	TRUE	0.0790453	-0.130986	TMEM50A
MACO1	1037	4313	5350	2390852	6.71273e-10	0	two.sided	FALSE	TRUE	9.06438e-09	0.769433	MACO1
LDLRAP1	1037	4313	5350	2244393	0.694468	0	two.sided	FALSE	TRUE	0.794412	0.0467282	LDLRAP1
SELENON	1037	4313	5350	2.2426e+06	0.528026	0	two.sided	FALSE	TRUE	0.658016	0.221528	SELENON
MTFR1L	1037	4313	5350	2.21153e+06	0.0852397	0	two.sided	FALSE	TRUE	0.173375	-0.532136	MTFR1L
STMN1	1037	4313	5350	2114011	1.9102e-08	0	two.sided	FALSE	TRUE	2.14344e-07	-1.19961	STMN1
PAFAH2	1037	4313	5350	2224864	0.454985	0	two.sided	FALSE	TRUE	0.597159	-0.200585	PAFAH2
PDIK1L	1037	4313	5350	2216807	0.0427539	0	two.sided	FALSE	TRUE	0.101801	-1.00187	PDIK1L
ZNF593	1037	4313	5350	2220671	0.461135	0	two.sided	FALSE	TRUE	0.602039	-0.13977	ZNF593
CEP85	1037	4313	5350	2240831	0.626536	0	two.sided	FALSE	TRUE	0.74074	0.220873	CEP85
SH3BGRL3	1037	4313	5350	1.2506e+06	1.84047e-108	0	two.sided	FALSE	TRUE	1.73289e-105	-0.319653	SH3BGRL3
UBXN11	1037	4313	5350	2.22174e+06	0.484319	0	two.sided	FALSE	TRUE	0.621265	-0.126328	UBXN11
CD52	1037	4313	5350	1.65952e+06	1.483e-38	0	two.sided	FALSE	TRUE	1.34731e-36	-0.338132	CD52
ZNF683	1037	4313	5350	2.25578e+06	0.11838	0	two.sided	FALSE	TRUE	0.223202	0.432151	ZNF683
DHDDS	1037	4313	5350	2.22168e+06	0.3049	0	two.sided	FALSE	TRUE	0.450607	-0.303468	DHDDS
HMGN2	1037	4313	5350	2155880	0.0566268	0	two.sided	FALSE	TRUE	0.126425	-0.0955387	HMGN2
RPS6KA1	1037	4313	5350	2.00507e+06	1.50205e-15	0	two.sided	FALSE	TRUE	3.49589e-14	-1.20484	RPS6KA1
ARID1A	1037	4313	5350	2211804	0.449944	0	two.sided	FALSE	TRUE	0.592658	-0.0649628	ARID1A
PIGV	1037	4313	5350	2.21404e+06	0.017105	0	two.sided	FALSE	TRUE	0.0485625	-1.32265	PIGV
ZDHHC18	1037	4313	5350	2.35183e+06	1.51154e-05	0	two.sided	FALSE	TRUE	0.000105397	0.532657	ZDHHC18
GPN2	1037	4313	5350	2.22829e+06	0.632288	0	two.sided	FALSE	TRUE	0.745193	-0.117962	GPN2
GPATCH3	1037	4313	5350	2238090	0.928557	0	two.sided	FALSE	TRUE	0.956543	1.43948e-05	GPATCH3
NUDC	1037	4313	5350	2208839	0.417962	0	two.sided	FALSE	TRUE	0.562552	-0.072433	NUDC
SLC9A1	1037	4313	5350	2252300	0.264668	0	two.sided	FALSE	TRUE	0.408029	0.273036	SLC9A1
WDTC1	1037	4313	5350	2.1548e+06	0.000541717	0	two.sided	FALSE	TRUE	0.00252501	-0.602574	WDTC1
TMEM222	1037	4313	5350	2204811	0.170732	0	two.sided	FALSE	TRUE	0.295697	-0.256646	TMEM222
SYTL1	1037	4313	5350	1.94249e+06	5.87398e-14	0	two.sided	FALSE	TRUE	1.19288e-12	-0.562681	SYTL1
MAP3K6	1037	4313	5350	2241173	0.681883	0	two.sided	FALSE	TRUE	0.784138	0.160583	MAP3K6
WASF2	1037	4313	5350	2047061	1.91522e-06	0	two.sided	FALSE	TRUE	1.56189e-05	-0.300523	WASF2
AHDC1	1037	4313	5350	2216102	0.0984871	0	two.sided	FALSE	TRUE	0.193849	-0.559482	AHDC1
FGR	1037	4313	5350	1.8676e+06	3.17951e-31	0	two.sided	FALSE	TRUE	2.07108e-29	-1.63045	FGR
IFI6	1037	4313	5350	2.1774e+06	0.0613364	0	two.sided	FALSE	TRUE	0.134646	-0.207405	IFI6
FAM76A	1037	4313	5350	2.25004e+06	0.472328	0	two.sided	FALSE	TRUE	0.611578	0.124416	FAM76A
STX12	1037	4313	5350	2226270	0.668605	0	two.sided	FALSE	TRUE	0.773368	-0.0782996	STX12
PPP1R8	1037	4313	5350	2233272	0.865346	0	two.sided	FALSE	TRUE	0.915276	-0.0310815	PPP1R8
THEMIS2	1037	4313	5350	2.23332e+06	0.879764	0	two.sided	FALSE	TRUE	0.92439	-0.0484785	THEMIS2
RPA2	1037	4313	5350	2.08425e+06	4.62926e-08	0	two.sided	FALSE	TRUE	4.88241e-07	-0.758539	RPA2
XKR8	1037	4313	5350	2.18371e+06	0.000231255	0	two.sided	FALSE	TRUE	0.00119576	-1.31568	XKR8
EYA3	1037	4313	5350	2189088	0.000251095	0	two.sided	FALSE	TRUE	0.00127919	-1.46417	EYA3
DNAJC8	1037	4313	5350	2128859	0.00333084	0	two.sided	FALSE	TRUE	0.0121943	-0.242724	DNAJC8
ATP5IF1	1037	4313	5350	2024871	3.52732e-07	0	two.sided	FALSE	TRUE	3.25892e-06	-0.292891	ATP5IF1
SESN2	1037	4313	5350	2.20467e+06	0.0906783	0	two.sided	FALSE	TRUE	0.182041	-0.437872	SESN2
MED18	1037	4313	5350	2218308	0.0109116	0	two.sided	FALSE	TRUE	0.0335843	-2.28664	MED18
PHACTR4	1037	4313	5350	2.27163e+06	0.13824	0	two.sided	FALSE	TRUE	0.251272	0.220486	PHACTR4
RCC1	1037	4313	5350	2213352	0.316128	0	two.sided	FALSE	TRUE	0.461927	-0.174741	RCC1
TRNAU1AP	1037	4313	5350	2152425	9.41586e-05	0	two.sided	FALSE	TRUE	0.000542381	-0.788565	TRNAU1AP
SNHG12	1037	4313	5350	2.31562e+06	0.00233615	0	two.sided	FALSE	TRUE	0.00905521	0.398163	SNHG12
TAF12	1037	4313	5350	2158149	0.000770543	0	two.sided	FALSE	TRUE	0.00341485	-0.606064	TAF12
GMEB1	1037	4313	5350	2208820	0.148843	0	two.sided	FALSE	TRUE	0.266016	-0.348826	GMEB1
YTHDF2	1037	4313	5350	2.30342e+06	0.0489418	0	two.sided	FALSE	TRUE	0.112918	0.162499	YTHDF2
EPB41	1037	4313	5350	2.06519e+06	1.50187e-05	0	two.sided	FALSE	TRUE	0.000104818	-0.315883	EPB41
SRSF4	1037	4313	5350	2.3149e+06	0.0290593	0	two.sided	FALSE	TRUE	0.0749739	0.174403	SRSF4
MECR	1037	4313	5350	2.20376e+06	0.00231751	0	two.sided	FALSE	TRUE	0.00899544	-1.52864	MECR
MATN1-AS1	1037	4313	5350	2279104	2.28602e-05	0	two.sided	FALSE	TRUE	0.00015275	1.31987	MATN1-AS1
LAPTM5	1037	4313	5350	2234636	0.969969	0	two.sided	FALSE	TRUE	0.982298	0.00547436	LAPTM5
PUM1	1037	4313	5350	2362046	6.07604e-05	0	two.sided	FALSE	TRUE	0.000368199	0.409812	PUM1
SNRNP40	1037	4313	5350	2.22809e+06	0.76057	0	two.sided	FALSE	TRUE	0.842664	-0.0516074	SNRNP40
ZCCHC17	1037	4313	5350	2.12273e+06	1.69499e-07	0	two.sided	FALSE	TRUE	1.64991e-06	-1.10743	ZCCHC17
PEF1	1037	4313	5350	2245522	0.717244	0	two.sided	FALSE	TRUE	0.812568	0.029987	PEF1
PTP4A2	1037	4313	5350	2.0559e+06	3.67754e-05	0	two.sided	FALSE	TRUE	0.000234245	-0.121226	PTP4A2
KHDRBS1	1037	4313	5350	2.14881e+06	0.0341477	0	two.sided	FALSE	TRUE	0.0854477	-0.121717	KHDRBS1
TMEM39B	1037	4313	5350	2.21313e+06	0.0448703	0	two.sided	FALSE	TRUE	0.105667	-0.803378	TMEM39B
KPNA6	1037	4313	5350	2290941	0.0136424	0	two.sided	FALSE	TRUE	0.0404045	0.345763	KPNA6
TXLNA	1037	4313	5350	2.17678e+06	0.000494342	0	two.sided	FALSE	TRUE	0.00233445	-0.898895	TXLNA
CCDC28B	1037	4313	5350	2.19408e+06	0.00180877	0	two.sided	FALSE	TRUE	0.00724418	-1.13945	CCDC28B
TMEM234	1037	4313	5350	2.26425e+06	0.0245271	0	two.sided	FALSE	TRUE	0.0653194	0.575176	TMEM234
EIF3I	1037	4313	5350	2173201	0.0863479	0	two.sided	FALSE	TRUE	0.175114	-0.147349	EIF3I
LCK	1037	4313	5350	1739514	2.44903e-31	0	two.sided	FALSE	TRUE	1.60536e-29	-0.582471	LCK
HDAC1	1037	4313	5350	1.91105e+06	3.46863e-21	0	two.sided	FALSE	TRUE	1.24306e-19	-1.02787	HDAC1
MARCKSL1	1037	4313	5350	2104947	3.48522e-07	0	two.sided	FALSE	TRUE	3.2229e-06	-0.823189	MARCKSL1
FAM229A	1037	4313	5350	2.2361e+06	0.980078	0	two.sided	FALSE	TRUE	0.987515	0.0663813	FAM229A
BSDC1	1037	4313	5350	2425066	5.01255e-10	0	two.sided	FALSE	TRUE	6.88528e-09	0.638029	BSDC1
ZBTB8OS	1037	4313	5350	2.19079e+06	0.100756	0	two.sided	FALSE	TRUE	0.197414	-0.216351	ZBTB8OS
RBBP4	1037	4313	5350	2125548	0.00208984	0	two.sided	FALSE	TRUE	0.00823611	-0.286636	RBBP4
SYNC	1037	4313	5350	2.24736e+06	0.159532	0	two.sided	FALSE	TRUE	0.280426	0.55821	SYNC
YARS	1037	4313	5350	2.27176e+06	0.261241	0	two.sided	FALSE	TRUE	0.403772	0.138589	YARS
S100PBP	1037	4313	5350	2198008	0.0549371	0	two.sided	FALSE	TRUE	0.123611	-0.382592	S100PBP
RNF19B	1037	4313	5350	2.22071e+06	0.430668	0	two.sided	FALSE	TRUE	0.574872	-0.138913	RNF19B
AK2	1037	4313	5350	2176588	0.0105611	0	two.sided	FALSE	TRUE	0.0327292	-0.440243	AK2
TRIM62	1037	4313	5350	2.24142e+06	0.499252	0	two.sided	FALSE	TRUE	0.634832	0.282451	TRIM62
ZNF362	1037	4313	5350	2.25605e+06	0.293137	0	two.sided	FALSE	TRUE	0.439303	0.129211	ZNF362
PHC2	1037	4313	5350	2.22991e+06	0.800996	0	two.sided	FALSE	TRUE	0.870398	-0.0362802	PHC2
SMIM12	1037	4313	5350	2.19666e+06	0.0901589	0	two.sided	FALSE	TRUE	0.181316	-0.296172	SMIM12
AC114490.3	1037	4313	5350	2230993	0.538028	0	two.sided	FALSE	TRUE	0.666311	-0.243833	AC114490.3
TMEM35B	1037	4313	5350	2173864	0.000227461	0	two.sided	FALSE	TRUE	0.0011785	-0.998723	TMEM35B
ZMYM6	1037	4313	5350	2.22335e+06	0.198176	0	two.sided	FALSE	TRUE	0.330944	-0.56292	ZMYM6
ZMYM1	1037	4313	5350	2210311	0.0405804	0	two.sided	FALSE	TRUE	0.0977421	-0.74752	ZMYM1
SFPQ	1037	4313	5350	2.75317e+06	2.84907e-33	0	two.sided	FALSE	TRUE	2.02108e-31	0.471502	SFPQ
ZMYM4	1037	4313	5350	2206932	0.0818973	0	two.sided	FALSE	TRUE	0.168396	-0.418472	ZMYM4
KIAA0319L	1037	4313	5350	2.23661e+06	0.988105	0	two.sided	FALSE	TRUE	0.992609	0.0611561	KIAA0319L
NCDN	1037	4313	5350	2.2178e+06	0.0964734	0	two.sided	FALSE	TRUE	0.191047	-0.671802	NCDN
AC004865.2	1037	4313	5350	2.1412e+06	1.34046e-05	0	two.sided	FALSE	TRUE	9.40593e-05	-0.823962	AC004865.2
PSMB2	1037	4313	5350	2.2411e+06	0.880616	0	two.sided	FALSE	TRUE	0.925004	6.56723e-05	PSMB2
C1orf216	1037	4313	5350	2190134	0.000390458	0	two.sided	FALSE	TRUE	0.00189769	-1.43752	C1orf216
AGO4	1037	4313	5350	2193223	0.039347	0	two.sided	FALSE	TRUE	0.0955044	-0.368489	AGO4
AGO1	1037	4313	5350	2246449	0.520818	0	two.sided	FALSE	TRUE	0.652566	0.232162	AGO1
AGO3	1037	4313	5350	2236853	0.982165	0	two.sided	FALSE	TRUE	0.988945	-0.0352845	AGO3
ADPRHL2	1037	4313	5350	2246057	0.583776	0	two.sided	FALSE	TRUE	0.704846	0.105422	ADPRHL2
TRAPPC3	1037	4313	5350	2111704	3.02725e-06	0	two.sided	FALSE	TRUE	2.38246e-05	-0.717651	TRAPPC3
MAP7D1	1037	4313	5350	2184420	0.13096	0	two.sided	FALSE	TRUE	0.241028	-0.158809	MAP7D1
THRAP3	1037	4313	5350	2.284e+06	0.216765	0	two.sided	FALSE	TRUE	0.353549	0.0736528	THRAP3
EVA1B	1037	4313	5350	2.22061e+06	0.225238	0	two.sided	FALSE	TRUE	0.364271	-0.402822	EVA1B
STK40	1037	4313	5350	2.18028e+06	0.00366856	0	two.sided	FALSE	TRUE	0.0132619	-0.60856	STK40
LSM10	1037	4313	5350	2.1318e+06	0.000231829	0	two.sided	FALSE	TRUE	0.00119753	-0.481938	LSM10
MRPS15	1037	4313	5350	2283351	0.147366	0	two.sided	FALSE	TRUE	0.263742	0.115812	MRPS15
CSF3R	1037	4313	5350	2.25232e+06	0.00631801	0	two.sided	FALSE	TRUE	0.0211972	1.42854	CSF3R
LINC01137	1037	4313	5350	2219860	0.0671136	0	two.sided	FALSE	TRUE	0.14448	-0.906869	LINC01137
ZC3H12A	1037	4313	5350	2616692	1.56736e-38	0	two.sided	FALSE	TRUE	1.41157e-36	1.18886	ZC3H12A
MEAF6	1037	4313	5350	2051589	1.50231e-07	0	two.sided	FALSE	TRUE	1.47343e-06	-0.484217	MEAF6
SNIP1	1037	4313	5350	2.40373e+06	3.24202e-09	0	two.sided	FALSE	TRUE	4.00687e-08	0.629431	SNIP1
GNL2	1037	4313	5350	2.23308e+06	0.889873	0	two.sided	FALSE	TRUE	0.931798	-0.0271377	GNL2
C1orf109	1037	4313	5350	2221666	0.203518	0	two.sided	FALSE	TRUE	0.337308	-0.494902	C1orf109
CDCA8	1037	4313	5350	2.23437e+06	0.785509	0	two.sided	FALSE	TRUE	0.861277	-0.125226	CDCA8
MANEAL	1037	4313	5350	2.21803e+06	0.0261788	0	two.sided	FALSE	TRUE	0.0688331	-1.44659	MANEAL
YRDC	1037	4313	5350	2.25349e+06	0.517765	0	two.sided	FALSE	TRUE	0.650039	0.0852233	YRDC
C1orf122	1037	4313	5350	2.19594e+06	0.183684	0	two.sided	FALSE	TRUE	0.312435	-0.165932	C1orf122
MTF1	1037	4313	5350	2240139	0.845158	0	two.sided	FALSE	TRUE	0.903706	-0.0117822	MTF1
INPP5B	1037	4313	5350	2206484	0.0432211	0	two.sided	FALSE	TRUE	0.102623	-0.569685	INPP5B
SF3A3	1037	4313	5350	2.17858e+06	0.0395205	0	two.sided	FALSE	TRUE	0.0957459	-0.250135	SF3A3
FHL3	1037	4313	5350	2.25895e+06	0.140252	0	two.sided	FALSE	TRUE	0.254394	0.379797	FHL3
UTP11	1037	4313	5350	2.23345e+06	0.850537	0	two.sided	FALSE	TRUE	0.906475	-0.0295075	UTP11
RRAGC	1037	4313	5350	2206205	0.123927	0	two.sided	FALSE	TRUE	0.231079	-0.32993	RRAGC
AL139260.1	1037	4313	5350	2230345	0.476179	0	two.sided	FALSE	TRUE	0.614859	-0.45741	AL139260.1
MYCBP	1037	4313	5350	2221746	0.0717931	0	two.sided	FALSE	TRUE	0.15184	-1.08364	MYCBP
AKIRIN1	1037	4313	5350	2.41827e+06	1.77081e-08	0	two.sided	FALSE	TRUE	1.99135e-07	0.516161	AKIRIN1
NDUFS5	1037	4313	5350	2402268	6.67111e-05	0	two.sided	FALSE	TRUE	0.000399273	0.194208	NDUFS5
MACF1	1037	4313	5350	2.067e+06	2.00913e-05	0	two.sided	FALSE	TRUE	0.00013636	-0.290259	MACF1
PABPC4	1037	4313	5350	2374678	2.08491e-07	0	two.sided	FALSE	TRUE	2.0031e-06	0.57998	PABPC4
PPIE	1037	4313	5350	2192703	0.05318	0	two.sided	FALSE	TRUE	0.120522	-0.343508	PPIE
TRIT1	1037	4313	5350	2225944	0.362448	0	two.sided	FALSE	TRUE	0.509224	-0.31296	TRIT1
CAP1	1037	4313	5350	1.75792e+06	4.21468e-30	0	two.sided	FALSE	TRUE	2.58293e-28	-0.654925	CAP1
PPT1	1037	4313	5350	2208643	0.283902	0	two.sided	FALSE	TRUE	0.428876	-0.1663	PPT1
RLF	1037	4313	5350	2.40772e+06	3.9431e-08	0	two.sided	FALSE	TRUE	4.21887e-07	0.497674	RLF
AL050341.2	1037	4313	5350	2.22898e+06	0.424809	0	two.sided	FALSE	TRUE	0.569326	-0.354845	AL050341.2
ZMPSTE24	1037	4313	5350	2.17636e+06	0.00281667	0	two.sided	FALSE	TRUE	0.0106081	-0.651865	ZMPSTE24
SMAP2	1037	4313	5350	2.2999e+06	0.105688	0	two.sided	FALSE	TRUE	0.204717	0.0989764	SMAP2
ZFP69	1037	4313	5350	2.21492e+06	0.0129725	0	two.sided	FALSE	TRUE	0.0387083	-1.58774	ZFP69
EXO5	1037	4313	5350	2.22483e+06	0.233373	0	two.sided	FALSE	TRUE	0.37404	-0.5348	EXO5
ZNF684	1037	4313	5350	2228951	0.542281	0	two.sided	FALSE	TRUE	0.670295	-0.13995	ZNF684
NFYC-AS1	1037	4313	5350	2.25651e+06	0.0122971	0	two.sided	FALSE	TRUE	0.0370342	0.950694	NFYC-AS1
NFYC	1037	4313	5350	2181061	0.0153468	0	two.sided	FALSE	TRUE	0.044673	-0.433618	NFYC
CITED4	1037	4313	5350	2.26974e+06	0.0191815	0	two.sided	FALSE	TRUE	0.0532466	0.613885	CITED4
CTPS1	1037	4313	5350	2278409	0.0973891	0	two.sided	FALSE	TRUE	0.192455	0.21829	CTPS1
SCMH1	1037	4313	5350	2.24169e+06	0.660689	0	two.sided	FALSE	TRUE	0.767556	0.0797453	SCMH1
HIVEP3	1037	4313	5350	2147502	7.50747e-05	0	two.sided	FALSE	TRUE	0.000443553	-0.763408	HIVEP3
FOXJ3	1037	4313	5350	2.31968e+06	0.00384716	0	two.sided	FALSE	TRUE	0.0138015	0.288917	FOXJ3
PPCS	1037	4313	5350	2.10238e+06	3.89113e-06	0	two.sided	FALSE	TRUE	3.00525e-05	-0.634995	PPCS
PPIH	1037	4313	5350	2199818	0.224216	0	two.sided	FALSE	TRUE	0.362941	-0.160164	PPIH
YBX1	1037	4313	5350	2.35589e+06	0.00663184	0	two.sided	FALSE	TRUE	0.0220926	0.0689011	YBX1
P3H1	1037	4313	5350	2.20364e+06	0.0471617	0	two.sided	FALSE	TRUE	0.10974	-0.468176	P3H1
C1orf50	1037	4313	5350	2.23925e+06	0.815951	0	two.sided	FALSE	TRUE	0.882314	0.0540042	C1orf50
AC098484.3	1037	4313	5350	2.22309e+06	0.380799	0	two.sided	FALSE	TRUE	0.527123	-0.24826	AC098484.3
SVBP	1037	4313	5350	2.29853e+06	0.0152776	0	two.sided	FALSE	TRUE	0.0445092	0.277049	SVBP
ERMAP	1037	4313	5350	2237629	0.855913	0	two.sided	FALSE	TRUE	0.909106	0.070246	ERMAP
SLC2A1	1037	4313	5350	2202515	0.0786524	0	two.sided	FALSE	TRUE	0.163018	-0.406555	SLC2A1
EBNA1BP2	1037	4313	5350	2122218	2.97617e-08	0	two.sided	FALSE	TRUE	3.23444e-07	-1.33082	EBNA1BP2
ELOVL1	1037	4313	5350	2.20208e+06	0.190906	0	two.sided	FALSE	TRUE	0.321028	-0.196791	ELOVL1
MED8	1037	4313	5350	2.2723e+06	0.0570381	0	two.sided	FALSE	TRUE	0.127157	0.290715	MED8
SZT2	1037	4313	5350	2.26097e+06	0.149867	0	two.sided	FALSE	TRUE	0.267201	0.2602	SZT2
HYI	1037	4313	5350	2253338	0.0883152	0	two.sided	FALSE	TRUE	0.178579	0.602067	HYI
KDM4A	1037	4313	5350	2.24382e+06	0.385123	0	two.sided	FALSE	TRUE	0.531687	0.320379	KDM4A
ST3GAL3	1037	4313	5350	2233382	0.794608	0	two.sided	FALSE	TRUE	0.867586	-0.0685004	ST3GAL3
IPO13	1037	4313	5350	2211820	0.0251426	0	two.sided	FALSE	TRUE	0.0666228	-1.0258	IPO13
DPH2	1037	4313	5350	2205775	0.0106953	0	two.sided	FALSE	TRUE	0.0330465	-1.04147	DPH2
ATP6V0B	1037	4313	5350	2.12762e+06	0.0031998	0	two.sided	FALSE	TRUE	0.0117686	-0.235393	ATP6V0B
B4GALT2	1037	4313	5350	2217434	0.017579	0	two.sided	FALSE	TRUE	0.0496228	-1.65116	B4GALT2
DMAP1	1037	4313	5350	2210924	0.267213	0	two.sided	FALSE	TRUE	0.411002	-0.197718	DMAP1
ERI3	1037	4313	5350	2147907	9.75992e-05	0	two.sided	FALSE	TRUE	0.000558164	-0.650356	ERI3
RNF220	1037	4313	5350	2.18307e+06	0.127374	0	two.sided	FALSE	TRUE	0.236163	-0.141824	RNF220
ARMH1	1037	4313	5350	2289423	0.000950837	0	two.sided	FALSE	TRUE	0.00411526	0.5626	ARMH1
RPS8	1037	4313	5350	2.64055e+06	1.30765e-19	0	two.sided	FALSE	TRUE	4.12908e-18	0.061979	RPS8
PLK3	1037	4313	5350	2.50172e+06	9.95441e-29	0	two.sided	FALSE	TRUE	5.63376e-27	1.3094	PLK3
EIF2B3	1037	4313	5350	2.14072e+06	1.13495e-07	0	two.sided	FALSE	TRUE	1.12593e-06	-1.52077	EIF2B3
HECTD3	1037	4313	5350	2208638	0.143414	0	two.sided	FALSE	TRUE	0.258387	-0.360889	HECTD3
UROD	1037	4313	5350	2163176	0.00101865	0	two.sided	FALSE	TRUE	0.00436136	-0.580963	UROD
ZSWIM5	1037	4313	5350	2.26182e+06	0.026423	0	two.sided	FALSE	TRUE	0.0694399	0.634546	ZSWIM5
MUTYH	1037	4313	5350	2214657	0.273966	0	two.sided	FALSE	TRUE	0.418709	-0.248874	MUTYH
TOE1	1037	4313	5350	2218625	0.379782	0	two.sided	FALSE	TRUE	0.525994	-0.163171	TOE1
TESK2	1037	4313	5350	2225578	0.289324	0	two.sided	FALSE	TRUE	0.434784	-0.352975	TESK2
CCDC163	1037	4313	5350	2.22592e+06	0.167537	0	two.sided	FALSE	TRUE	0.291431	-0.722184	CCDC163
PRDX1	1037	4313	5350	2006192	2.0221e-12	0	two.sided	FALSE	TRUE	3.54363e-11	-0.819325	PRDX1
AKR1A1	1037	4313	5350	2140764	0.000261877	0	two.sided	FALSE	TRUE	0.00132954	-0.541366	AKR1A1
NASP	1037	4313	5350	2192297	0.102457	0	two.sided	FALSE	TRUE	0.199802	-0.236906	NASP
GPBP1L1	1037	4313	5350	2.28643e+06	0.0604561	0	two.sided	FALSE	TRUE	0.133137	0.216211	GPBP1L1
TMEM69	1037	4313	5350	2243746	0.589994	0	two.sided	FALSE	TRUE	0.71111	0.21134	TMEM69
IPP	1037	4313	5350	2.17463e+06	0.000173122	0	two.sided	FALSE	TRUE	0.000925673	-1.0738	IPP
MAST2	1037	4313	5350	2238165	0.867332	0	two.sided	FALSE	TRUE	0.916909	0.0382488	MAST2
PIK3R3	1037	4313	5350	2.22003e+06	0.0321258	0	two.sided	FALSE	TRUE	0.0813513	-1.49429	PIK3R3
POMGNT1	1037	4313	5350	2.17789e+06	0.000821507	0	two.sided	FALSE	TRUE	0.00360829	-0.851765	POMGNT1
LRRC41	1037	4313	5350	2.23415e+06	0.899115	0	two.sided	FALSE	TRUE	0.937872	-0.0443481	LRRC41
UQCRH	1037	4313	5350	2.21672e+06	0.637017	0	two.sided	FALSE	TRUE	0.748875	-0.0296319	UQCRH
NSUN4	1037	4313	5350	2.25342e+06	0.270059	0	two.sided	FALSE	TRUE	0.414309	0.255119	NSUN4
MKNK1	1037	4313	5350	2.21869e+06	0.41613	0	two.sided	FALSE	TRUE	0.560815	-0.1111	MKNK1
MOB3C	1037	4313	5350	2231702	0.516032	0	two.sided	FALSE	TRUE	0.648524	-0.263763	MOB3C
ATPAF1	1037	4313	5350	2.16828e+06	0.0035025	0	two.sided	FALSE	TRUE	0.0127507	-0.480951	ATPAF1
EFCAB14	1037	4313	5350	2.11926e+06	0.000254686	0	two.sided	FALSE	TRUE	0.00129609	-0.398026	EFCAB14
CMPK1	1037	4313	5350	2.23836e+06	0.956827	0	two.sided	FALSE	TRUE	0.973368	-0.0051085	CMPK1
FAF1	1037	4313	5350	2.23769e+06	0.957524	0	two.sided	FALSE	TRUE	0.973598	0.0307989	FAF1
CDKN2C	1037	4313	5350	2.24128e+06	0.640686	0	two.sided	FALSE	TRUE	0.751227	0.203871	CDKN2C
RNF11	1037	4313	5350	2.36737e+06	1.52726e-05	0	two.sided	FALSE	TRUE	0.000106374	0.413493	RNF11
EPS15	1037	4313	5350	2.14766e+06	0.0115836	0	two.sided	FALSE	TRUE	0.0353066	-0.22312	EPS15
OSBPL9	1037	4313	5350	2285140	0.0712745	0	two.sided	FALSE	TRUE	0.151083	0.219388	OSBPL9
NRDC	1037	4313	5350	2097700	1.06108e-05	0	two.sided	FALSE	TRUE	7.6264e-05	-0.524592	NRDC
TXNDC12	1037	4313	5350	2.20209e+06	0.198863	0	two.sided	FALSE	TRUE	0.33143	-0.151569	TXNDC12
KTI12	1037	4313	5350	2.18865e+06	0.0103621	0	two.sided	FALSE	TRUE	0.0321608	-0.580351	KTI12
BTF3L4	1037	4313	5350	2271103	0.106413	0	two.sided	FALSE	TRUE	0.205876	0.247913	BTF3L4
ZFYVE9	1037	4313	5350	2262947	0.000789218	0	two.sided	FALSE	TRUE	0.00349015	1.34186	ZFYVE9
CC2D1B	1037	4313	5350	2.21957e+06	0.339658	0	two.sided	FALSE	TRUE	0.485755	-0.221199	CC2D1B
PRPF38A	1037	4313	5350	2.17127e+06	0.0102998	0	two.sided	FALSE	TRUE	0.0320344	-0.357046	PRPF38A
TUT4	1037	4313	5350	2.40443e+06	1.48889e-06	0	two.sided	FALSE	TRUE	1.23561e-05	0.372335	TUT4
GPX7	1037	4313	5350	2.20811e+06	0.0422476	0	two.sided	FALSE	TRUE	0.10082	-0.660109	GPX7
SHISAL2A	1037	4313	5350	2.21222e+06	0.214814	0	two.sided	FALSE	TRUE	0.351205	-0.247392	SHISAL2A
ZYG11B	1037	4313	5350	2261130	0.0281225	0	two.sided	FALSE	TRUE	0.0730171	0.585133	ZYG11B
ECHDC2	1037	4313	5350	2.22571e+06	0.650001	0	two.sided	FALSE	TRUE	0.75914	-0.101376	ECHDC2
SCP2	1037	4313	5350	1.98523e+06	1.9208e-13	0	two.sided	FALSE	TRUE	3.66367e-12	-0.764273	SCP2
CPT2	1037	4313	5350	2.26306e+06	0.0267643	0	two.sided	FALSE	TRUE	0.0700704	0.581627	CPT2
C1orf123	1037	4313	5350	2135157	6.57102e-05	0	two.sided	FALSE	TRUE	0.000393843	-0.628714	C1orf123
MAGOH	1037	4313	5350	2.30399e+06	0.0659601	0	two.sided	FALSE	TRUE	0.14253	0.165273	MAGOH
LRP8	1037	4313	5350	2226846	0.455138	0	two.sided	FALSE	TRUE	0.597173	-0.283371	LRP8
NDC1	1037	4313	5350	2.23579e+06	0.954398	0	two.sided	FALSE	TRUE	0.972043	-0.0543962	NDC1
YIPF1	1037	4313	5350	2.19357e+06	0.00670238	0	two.sided	FALSE	TRUE	0.0222632	-0.74813	YIPF1
HSPB11	1037	4313	5350	2204396	0.29024	0	two.sided	FALSE	TRUE	0.435844	-0.145385	HSPB11
LRRC42	1037	4313	5350	2218812	0.232485	0	two.sided	FALSE	TRUE	0.373194	-0.294497	LRRC42
TMEM59	1037	4313	5350	2.10395e+06	0.00107308	0	two.sided	FALSE	TRUE	0.00455302	-0.190074	TMEM59
TCEANC2	1037	4313	5350	2231550	0.654089	0	two.sided	FALSE	TRUE	0.76254	-0.174903	TCEANC2
MRPL37	1037	4313	5350	2278504	0.108672	0	two.sided	FALSE	TRUE	0.209476	0.188327	MRPL37
SSBP3	1037	4313	5350	2004949	5.4754e-13	0	two.sided	FALSE	TRUE	1.01085e-11	-0.847932	SSBP3
TTC4	1037	4313	5350	2224919	0.250407	0	two.sided	FALSE	TRUE	0.392953	-0.486468	TTC4
TTC22	1037	4313	5350	2223275	0.183415	0	two.sided	FALSE	TRUE	0.312028	-0.592742	TTC22
DHCR24	1037	4313	5350	2.2126e+06	0.00262017	0	two.sided	FALSE	TRUE	0.00997689	-2.66727	DHCR24
USP24	1037	4313	5350	2246870	0.686621	0	two.sided	FALSE	TRUE	0.787349	0.0474988	USP24
OMA1	1037	4313	5350	2.19502e+06	0.00184933	0	two.sided	FALSE	TRUE	0.00738378	-1.17715	OMA1
MYSM1	1037	4313	5350	2228501	0.747793	0	two.sided	FALSE	TRUE	0.835084	-0.0290547	MYSM1
JUN	1037	4313	5350	3.13333e+06	6.73018e-91	0	two.sided	FALSE	TRUE	3.48523e-88	0.709384	JUN
FGGY	1037	4313	5350	2.22674e+06	0.277038	0	two.sided	FALSE	TRUE	0.42183	-0.549724	FGGY
HOOK1	1037	4313	5350	2275210	1.45118e-06	0	two.sided	FALSE	TRUE	1.20916e-05	1.60342	HOOK1
NFIA	1037	4313	5350	2259495	0.038601	0	two.sided	FALSE	TRUE	0.0941348	0.555824	NFIA
TM2D1	1037	4313	5350	2151010	4.75986e-05	0	two.sided	FALSE	TRUE	0.000295728	-0.85264	TM2D1
PATJ	1037	4313	5350	2287165	0.000275082	0	two.sided	FALSE	TRUE	0.00138571	0.883812	PATJ
USP1	1037	4313	5350	2213686	0.413208	0	two.sided	FALSE	TRUE	0.558132	-0.113645	USP1
DOCK7	1037	4313	5350	2.23984e+06	0.748436	0	two.sided	FALSE	TRUE	0.835394	0.180849	DOCK7
ATG4C	1037	4313	5350	2227254	0.300514	0	two.sided	FALSE	TRUE	0.446481	-0.526186	ATG4C
ALG6	1037	4313	5350	2.24398e+06	0.588147	0	two.sided	FALSE	TRUE	0.709462	0.240079	ALG6
ITGB3BP	1037	4313	5350	2222986	0.365742	0	two.sided	FALSE	TRUE	0.512306	-0.252795	ITGB3BP
EFCAB7	1037	4313	5350	2.24239e+06	0.581528	0	two.sided	FALSE	TRUE	0.703198	0.161686	EFCAB7
PGM1	1037	4313	5350	2175631	0.00241238	0	two.sided	FALSE	TRUE	0.00931236	-0.637508	PGM1
JAK1	1037	4313	5350	2075466	0.000200348	0	two.sided	FALSE	TRUE	0.00105437	-0.142996	JAK1
LEPROT	1037	4313	5350	2.24024e+06	0.835083	0	two.sided	FALSE	TRUE	0.896387	0.0671285	LEPROT
PDE4B	1037	4313	5350	2529571	1.48784e-23	0	two.sided	FALSE	TRUE	6.16382e-22	1.04597	PDE4B
MIER1	1037	4313	5350	2.52846e+06	6.16258e-16	0	two.sided	FALSE	TRUE	1.47404e-14	0.56104	MIER1
SLC35D1	1037	4313	5350	2.25459e+06	0.203498	0	two.sided	FALSE	TRUE	0.337308	0.341947	SLC35D1
SERBP1	1037	4313	5350	2334176	0.0162273	0	two.sided	FALSE	TRUE	0.0465945	0.135449	SERBP1
GADD45A	1037	4313	5350	2.31685e+06	0.000315988	0	two.sided	FALSE	TRUE	0.0015719	0.578832	GADD45A
LRRC40	1037	4313	5350	2256533	0.256881	0	two.sided	FALSE	TRUE	0.399357	0.250119	LRRC40
SRSF11	1037	4313	5350	2.48291e+06	2.87354e-09	0	two.sided	FALSE	TRUE	3.56862e-08	0.312171	SRSF11
ANKRD13C	1037	4313	5350	2.23864e+06	0.920373	0	two.sided	FALSE	TRUE	0.950906	0.0185011	ANKRD13C
HHLA3	1037	4313	5350	2.22809e+06	0.404674	0	two.sided	FALSE	TRUE	0.550616	-0.383921	HHLA3
CTH	1037	4313	5350	2.25627e+06	0.00424454	0	two.sided	FALSE	TRUE	0.0150088	1.19612	CTH
ZRANB2	1037	4313	5350	2.2408e+06	0.90039	0	two.sided	FALSE	TRUE	0.938918	-0.0147954	ZRANB2
CRYZ	1037	4313	5350	2173654	0.0001902	0	two.sided	FALSE	TRUE	0.00100762	-1.0565	CRYZ
TYW3	1037	4313	5350	2236917	0.974903	0	two.sided	FALSE	TRUE	0.985272	0.0305334	TYW3
ACADM	1037	4313	5350	2177925	0.000418434	0	two.sided	FALSE	TRUE	0.00201568	-0.979207	ACADM
RABGGTB	1037	4313	5350	2476122	1.55916e-15	0	two.sided	FALSE	TRUE	3.59649e-14	0.746425	RABGGTB
PIGK	1037	4313	5350	2.18611e+06	0.00314633	0	two.sided	FALSE	TRUE	0.0116132	-0.768968	PIGK
AC118549.1	1037	4313	5350	2.22745e+06	0.690544	0	two.sided	FALSE	TRUE	0.790709	0.00386312	AC118549.1
USP33	1037	4313	5350	2.16713e+06	0.0150871	0	two.sided	FALSE	TRUE	0.0440162	-0.329531	USP33
MIGA1	1037	4313	5350	2260599	0.239113	0	two.sided	FALSE	TRUE	0.38018	0.209896	MIGA1
FUBP1	1037	4313	5350	2402237	1.80013e-06	0	two.sided	FALSE	TRUE	1.475e-05	0.374188	FUBP1
DNAJB4	1037	4313	5350	2.35799e+06	3.89331e-17	0	two.sided	FALSE	TRUE	1.00057e-15	1.68425	DNAJB4
AC103591.3	1037	4313	5350	2.36023e+06	1.71333e-10	0	two.sided	FALSE	TRUE	2.51346e-09	1.01293	AC103591.3
IFI44	1037	4313	5350	2304002	8.02748e-07	0	two.sided	FALSE	TRUE	7.00427e-06	1.09875	IFI44
AL359504.2	1037	4313	5350	2.22231e+06	0.169043	0	two.sided	FALSE	TRUE	0.29346	-0.598199	AL359504.2
PRKACB	1037	4313	5350	2070210	1.23537e-06	0	two.sided	FALSE	TRUE	1.04362e-05	-0.484779	PRKACB
RPF1	1037	4313	5350	2.32061e+06	0.0032477	0	two.sided	FALSE	TRUE	0.0119152	0.303841	RPF1
GNG5	1037	4313	5350	2089393	0.000180012	0	two.sided	FALSE	TRUE	0.000959274	-0.266353	GNG5
CTBS	1037	4313	5350	2324139	0.000302421	0	two.sided	FALSE	TRUE	0.00150948	0.462781	CTBS
SSX2IP	1037	4313	5350	2.24024e+06	0.754599	0	two.sided	FALSE	TRUE	0.83892	0.0471666	SSX2IP
MCOLN2	1037	4313	5350	2276771	0.212699	0	two.sided	FALSE	TRUE	0.349091	0.157771	MCOLN2
WDR63	1037	4313	5350	2222343	0.0946338	0	two.sided	FALSE	TRUE	0.188295	-0.958662	WDR63
C1orf52	1037	4313	5350	2.42547e+06	2.81783e-10	0	two.sided	FALSE	TRUE	4.01434e-09	0.61909	C1orf52
BCL10	1037	4313	5350	2.29062e+06	0.0330658	0	two.sided	FALSE	TRUE	0.0832431	0.256265	BCL10
ZNHIT6	1037	4313	5350	2244944	0.681764	0	two.sided	FALSE	TRUE	0.784138	0.093611	ZNHIT6
ODF2L	1037	4313	5350	2.29182e+06	0.0524838	0	two.sided	FALSE	TRUE	0.119231	0.218273	ODF2L
SH3GLB1	1037	4313	5350	2350806	0.000729031	0	two.sided	FALSE	TRUE	0.00325035	0.301613	SH3GLB1
SELENOF	1037	4313	5350	2.01529e+06	1.87392e-09	0	two.sided	FALSE	TRUE	2.40797e-08	-0.506629	SELENOF
HS2ST1	1037	4313	5350	2.23345e+06	0.853911	0	two.sided	FALSE	TRUE	0.908279	-0.0616778	HS2ST1
LMO4	1037	4313	5350	2.28301e+06	0.0433133	0	two.sided	FALSE	TRUE	0.102795	0.294594	LMO4
PKN2	1037	4313	5350	2.34832e+06	0.000157914	0	two.sided	FALSE	TRUE	0.000853754	0.388285	PKN2
GTF2B	1037	4313	5350	2470390	1.82508e-12	0	two.sided	FALSE	TRUE	3.21468e-11	0.600688	GTF2B
KYAT3	1037	4313	5350	2207788	0.116434	0	two.sided	FALSE	TRUE	0.220096	-0.333144	KYAT3
RBMXL1	1037	4313	5350	2247036	0.516761	0	two.sided	FALSE	TRUE	0.649211	0.166935	RBMXL1
GBP3	1037	4313	5350	2.22896e+06	0.718601	0	two.sided	FALSE	TRUE	0.813305	-0.102429	GBP3
GBP1	1037	4313	5350	2222960	0.60379	0	two.sided	FALSE	TRUE	0.721692	-0.0975375	GBP1
GBP2	1037	4313	5350	2350359	0.000239219	0	two.sided	FALSE	TRUE	0.00122944	0.31149	GBP2
GBP4	1037	4313	5350	2137419	0.000805023	0	two.sided	FALSE	TRUE	0.00354491	-0.405731	GBP4
AC099063.4	1037	4313	5350	2.22625e+06	0.256565	0	two.sided	FALSE	TRUE	0.399046	-0.492044	AC099063.4
GBP5	1037	4313	5350	2.37327e+06	0.000274541	0	two.sided	FALSE	TRUE	0.00138366	0.278347	GBP5
LRRC8B	1037	4313	5350	2.28044e+06	2.5629e-06	0	two.sided	FALSE	TRUE	2.04185e-05	1.49377	LRRC8B
LRRC8C-DT	1037	4313	5350	2.26366e+06	0.00198475	0	two.sided	FALSE	TRUE	0.00787285	1.05896	LRRC8C-DT
LRRC8C	1037	4313	5350	2314632	0.000133993	0	two.sided	FALSE	TRUE	0.000738962	0.624954	LRRC8C
LRRC8D	1037	4313	5350	2222894	0.258903	0	two.sided	FALSE	TRUE	0.401415	-0.395119	LRRC8D
ZNF326	1037	4313	5350	2.41286e+06	2.27815e-10	0	two.sided	FALSE	TRUE	3.27318e-09	0.686036	ZNF326
ZNF644	1037	4313	5350	2393503	3.45634e-06	0	two.sided	FALSE	TRUE	2.68951e-05	0.40292	ZNF644
CDC7	1037	4313	5350	2.25097e+06	0.269456	0	two.sided	FALSE	TRUE	0.413629	0.373803	CDC7
TGFBR3	1037	4313	5350	1947958	1.21065e-13	0	two.sided	FALSE	TRUE	2.35247e-12	-0.602374	TGFBR3
EPHX4	1037	4313	5350	2.23058e+06	0.40254	0	two.sided	FALSE	TRUE	0.548638	-0.432153	EPHX4
GLMN	1037	4313	5350	2.26704e+06	0.116792	0	two.sided	FALSE	TRUE	0.220652	0.272403	GLMN
RPAP2	1037	4313	5350	2.23774e+06	0.959522	0	two.sided	FALSE	TRUE	0.975007	0.00729688	RPAP2
GFI1	1037	4313	5350	2.18156e+06	0.0089758	0	two.sided	FALSE	TRUE	0.0285423	-0.481804	GFI1
EVI5	1037	4313	5350	2235571	0.925224	0	two.sided	FALSE	TRUE	0.954246	-0.0180122	EVI5
RPL5	1037	4313	5350	2.43417e+06	8.76236e-06	0	two.sided	FALSE	TRUE	6.43629e-05	0.0412042	RPL5
FAM69A	1037	4313	5350	2.25034e+06	0.251818	0	two.sided	FALSE	TRUE	0.394565	0.329103	FAM69A
MTF2	1037	4313	5350	2.25517e+06	0.451114	0	two.sided	FALSE	TRUE	0.593698	0.115234	MTF2
TMED5	1037	4313	5350	2429435	6.46398e-10	0	two.sided	FALSE	TRUE	8.77424e-09	0.583566	TMED5
CCDC18	1037	4313	5350	2.25998e+06	0.145333	0	two.sided	FALSE	TRUE	0.260914	0.286923	CCDC18
DR1	1037	4313	5350	2242556	0.849137	0	two.sided	FALSE	TRUE	0.90581	0.0372615	DR1
DNTTIP2	1037	4313	5350	2297990	0.0938401	0	two.sided	FALSE	TRUE	0.186976	0.136986	DNTTIP2
GCLM	1037	4313	5350	2242890	0.721776	0	two.sided	FALSE	TRUE	0.815573	0.0303992	GCLM
ABCD3	1037	4313	5350	2252071	0.366843	0	two.sided	FALSE	TRUE	0.513501	0.161155	ABCD3
ALG14	1037	4313	5350	2210093	0.00215346	0	two.sided	FALSE	TRUE	0.00846108	-2.29322	ALG14
RWDD3	1037	4313	5350	2189494	0.0278554	0	two.sided	FALSE	TRUE	0.0724325	-0.402409	RWDD3
PTBP2	1037	4313	5350	2.32347e+06	5.46074e-07	0	two.sided	FALSE	TRUE	4.8967e-06	0.890394	PTBP2
DPYD	1037	4313	5350	2209162	0.340951	0	two.sided	FALSE	TRUE	0.487201	-0.0714575	DPYD
AGL	1037	4313	5350	2.2283e+06	0.733212	0	two.sided	FALSE	TRUE	0.824178	-0.045003	AGL
SLC35A3	1037	4313	5350	2251803	0.254271	0	two.sided	FALSE	TRUE	0.397027	0.244768	SLC35A3
MFSD14A	1037	4313	5350	2466305	3.34474e-15	0	two.sided	FALSE	TRUE	7.49816e-14	0.787244	MFSD14A
SASS6	1037	4313	5350	2211066	0.0533448	0	two.sided	FALSE	TRUE	0.120763	-0.632447	SASS6
TRMT13	1037	4313	5350	2207288	0.0540646	0	two.sided	FALSE	TRUE	0.121966	-0.488794	TRMT13
DBT	1037	4313	5350	2.22357e+06	0.150692	0	two.sided	FALSE	TRUE	0.268257	-0.669083	DBT
RTCA	1037	4313	5350	2.22762e+06	0.723152	0	two.sided	FALSE	TRUE	0.81667	-0.0752088	RTCA
CDC14A	1037	4313	5350	2.43832e+06	1.57421e-12	0	two.sided	FALSE	TRUE	2.8014e-11	0.747571	CDC14A
VCAM1	1037	4313	5350	2250981	0.162895	0	two.sided	FALSE	TRUE	0.285466	0.597537	VCAM1
EXTL2	1037	4313	5350	2225606	0.303005	0	two.sided	FALSE	TRUE	0.448959	-0.410173	EXTL2
SLC30A7	1037	4313	5350	2245619	0.670223	0	two.sided	FALSE	TRUE	0.774462	0.0199517	SLC30A7
DPH5	1037	4313	5350	2239084	0.860701	0	two.sided	FALSE	TRUE	0.911947	0.0261886	DPH5
AC093157.1	1037	4313	5350	2222395	0.182556	0	two.sided	FALSE	TRUE	0.310942	-0.560527	AC093157.1
S1PR1	1037	4313	5350	2242335	0.841297	0	two.sided	FALSE	TRUE	0.900974	0.0605312	S1PR1
RNPC3	1037	4313	5350	2230613	0.855633	0	two.sided	FALSE	TRUE	0.908994	-0.0220946	RNPC3
PRMT6	1037	4313	5350	2222238	0.155506	0	two.sided	FALSE	TRUE	0.274983	-0.630116	PRMT6
VAV3	1037	4313	5350	2239574	0.911085	0	two.sided	FALSE	TRUE	0.945123	-0.0023487	VAV3
SLC25A24	1037	4313	5350	2.23111e+06	0.796391	0	two.sided	FALSE	TRUE	0.8686	-0.00902334	SLC25A24
FAM102B	1037	4313	5350	2.23328e+06	0.882176	0	two.sided	FALSE	TRUE	0.926144	0.0224071	FAM102B
HENMT1	1037	4313	5350	2110168	1.41192e-08	0	two.sided	FALSE	TRUE	1.60343e-07	-1.15703	HENMT1
PRPF38B	1037	4313	5350	2.33647e+06	0.00756153	0	two.sided	FALSE	TRUE	0.0246583	0.164226	PRPF38B
STXBP3	1037	4313	5350	2184136	0.007426	0	two.sided	FALSE	TRUE	0.0242928	-0.537689	STXBP3
CLCC1	1037	4313	5350	2.22537e+06	0.253171	0	two.sided	FALSE	TRUE	0.395843	-0.48176	CLCC1
WDR47	1037	4313	5350	2245446	0.582744	0	two.sided	FALSE	TRUE	0.703928	0.119784	WDR47
TAF13	1037	4313	5350	2260652	0.105659	0	two.sided	FALSE	TRUE	0.204717	0.367753	TAF13
TMEM167B	1037	4313	5350	2337782	6.07917e-05	0	two.sided	FALSE	TRUE	0.000368199	0.489642	TMEM167B
KIAA1324	1037	4313	5350	2.25163e+06	0.0452727	0	two.sided	FALSE	TRUE	0.106421	0.887522	KIAA1324
SARS	1037	4313	5350	2.18085e+06	0.0500626	0	two.sided	FALSE	TRUE	0.11489	-0.25339	SARS
PSMA5	1037	4313	5350	2.07919e+06	8.0632e-07	0	two.sided	FALSE	TRUE	7.0236e-06	-0.536073	PSMA5
ATXN7L2	1037	4313	5350	2228626	0.553465	0	two.sided	FALSE	TRUE	0.679497	-0.196303	ATXN7L2
CYB561D1	1037	4313	5350	2202351	0.00270027	0	two.sided	FALSE	TRUE	0.0102367	-1.38889	CYB561D1
AMIGO1	1037	4313	5350	2231782	0.544723	0	two.sided	FALSE	TRUE	0.672512	-0.263979	AMIGO1
GNAI3	1037	4313	5350	2196138	0.198732	0	two.sided	FALSE	TRUE	0.33143	-0.134035	GNAI3
AMPD2	1037	4313	5350	2232447	0.817286	0	two.sided	FALSE	TRUE	0.882886	-0.0696863	AMPD2
GSTM4	1037	4313	5350	2186463	0.0030429	0	two.sided	FALSE	TRUE	0.0112796	-0.809979	GSTM4
GSTM2	1037	4313	5350	2.23892e+06	0.794708	0	two.sided	FALSE	TRUE	0.867586	0.124071	GSTM2
GSTM3	1037	4313	5350	2247634	0.20003	0	two.sided	FALSE	TRUE	0.33302	0.496334	GSTM3
CSF1	1037	4313	5350	2255127	0.0285421	0	two.sided	FALSE	TRUE	0.0738841	0.991165	CSF1
AHCYL1	1037	4313	5350	2.15226e+06	7.78829e-06	0	two.sided	FALSE	TRUE	5.77817e-05	-1.12631	AHCYL1
STRIP1	1037	4313	5350	2.21624e+06	0.379193	0	two.sided	FALSE	TRUE	0.525409	-0.101429	STRIP1
RBM15	1037	4313	5350	2.37025e+06	1.5424e-07	0	two.sided	FALSE	TRUE	1.50847e-06	0.643334	RBM15
LAMTOR5	1037	4313	5350	2290349	0.14784	0	two.sided	FALSE	TRUE	0.264471	0.105445	LAMTOR5
AL365361.1	1037	4313	5350	2230469	0.631347	0	two.sided	FALSE	TRUE	0.744406	-0.172618	AL365361.1
KCNA3	1037	4313	5350	2282483	0.0936139	0	two.sided	FALSE	TRUE	0.186633	0.195798	KCNA3
CD53	1037	4313	5350	1941481	1.18474e-13	0	two.sided	FALSE	TRUE	2.30647e-12	-0.522337	CD53
AL360270.1	1037	4313	5350	2.24956e+06	0.0948391	0	two.sided	FALSE	TRUE	0.188604	0.741753	AL360270.1
LRIF1	1037	4313	5350	2.1912e+06	0.0159853	0	two.sided	FALSE	TRUE	0.0461041	-0.556423	LRIF1
AL360270.3	1037	4313	5350	2229704	0.394326	0	two.sided	FALSE	TRUE	0.54036	-0.296379	AL360270.3
DRAM2	1037	4313	5350	2198475	0.0904923	0	two.sided	FALSE	TRUE	0.18181	-0.279624	DRAM2
CEPT1	1037	4313	5350	2216633	0.155372	0	two.sided	FALSE	TRUE	0.274793	-0.459797	CEPT1
DENND2D	1037	4313	5350	2.05142e+06	1.04699e-08	0	two.sided	FALSE	TRUE	1.21703e-07	-0.646809	DENND2D
CHI3L2	1037	4313	5350	2.16407e+06	8.26661e-05	0	two.sided	FALSE	TRUE	0.000484261	-0.959657	CHI3L2
WDR77	1037	4313	5350	2158370	1.03049e-06	0	two.sided	FALSE	TRUE	8.84974e-06	-1.63741	WDR77
ATP5PB	1037	4313	5350	2.10587e+06	0.000608957	0	two.sided	FALSE	TRUE	0.00278453	-0.24884	ATP5PB
C1orf162	1037	4313	5350	2.21522e+06	0.319197	0	two.sided	FALSE	TRUE	0.465002	-0.263367	C1orf162
RAP1A	1037	4313	5350	2.02435e+06	1.11005e-08	0	two.sided	FALSE	TRUE	1.28313e-07	-0.463635	RAP1A
DDX20	1037	4313	5350	2.30962e+06	0.000154629	0	two.sided	FALSE	TRUE	0.000838919	0.65753	DDX20
ST7L	1037	4313	5350	2.28315e+06	0.00282253	0	two.sided	FALSE	TRUE	0.0106229	0.674186	ST7L
CAPZA1	1037	4313	5350	2273901	0.30687	0	two.sided	FALSE	TRUE	0.452679	0.07739	CAPZA1
MOV10	1037	4313	5350	2.25378e+06	0.326546	0	two.sided	FALSE	TRUE	0.472904	0.159378	MOV10
RHOC	1037	4313	5350	2151484	0.000450297	0	two.sided	FALSE	TRUE	0.00215017	-0.561114	RHOC
SLC16A1	1037	4313	5350	2.271e+06	0.0345083	0	two.sided	FALSE	TRUE	0.086121	0.44653	SLC16A1
SLC16A1-AS1	1037	4313	5350	2.22565e+06	0.378797	0	two.sided	FALSE	TRUE	0.52517	-0.29653	SLC16A1-AS1
LRIG2	1037	4313	5350	2.25294e+06	0.211875	0	two.sided	FALSE	TRUE	0.348512	0.336118	LRIG2
PHTF1	1037	4313	5350	2.25499e+06	0.235282	0	two.sided	FALSE	TRUE	0.37611	0.239147	PHTF1
RSBN1	1037	4313	5350	2.21692e+06	0.567655	0	two.sided	FALSE	TRUE	0.691834	-0.052721	RSBN1
PTPN22	1037	4313	5350	2166902	0.0392316	0	two.sided	FALSE	TRUE	0.0952912	-0.203733	PTPN22
AP4B1	1037	4313	5350	2.25811e+06	0.251491	0	two.sided	FALSE	TRUE	0.394113	0.264987	AP4B1
DCLRE1B	1037	4313	5350	2242277	0.49887	0	two.sided	FALSE	TRUE	0.63443	0.272113	DCLRE1B
HIPK1-AS1	1037	4313	5350	2.24311e+06	0.377987	0	two.sided	FALSE	TRUE	0.524212	0.589308	HIPK1-AS1
HIPK1	1037	4313	5350	2.49117e+06	2.44742e-15	0	two.sided	FALSE	TRUE	5.57098e-14	0.681909	HIPK1
TRIM33	1037	4313	5350	2202917	0.258898	0	two.sided	FALSE	TRUE	0.401415	-0.105359	TRIM33
BCAS2	1037	4313	5350	2.65402e+06	6.44478e-29	0	two.sided	FALSE	TRUE	3.72897e-27	0.743328	BCAS2
NRAS	1037	4313	5350	2252266	0.514215	0	two.sided	FALSE	TRUE	0.647426	0.104721	NRAS
CSDE1	1037	4313	5350	2.60689e+06	2.35204e-18	0	two.sided	FALSE	TRUE	6.69232e-17	0.374128	CSDE1
SIKE1	1037	4313	5350	2269441	0.15501	0	two.sided	FALSE	TRUE	0.274293	0.216744	SIKE1
TSPAN2	1037	4313	5350	2185149	0.000170914	0	two.sided	FALSE	TRUE	0.000915755	-1.37324	TSPAN2
VANGL1	1037	4313	5350	2.20883e+06	0.0165208	0	two.sided	FALSE	TRUE	0.0472936	-0.992207	VANGL1
ATP1A1	1037	4313	5350	2193735	0.227794	0	two.sided	FALSE	TRUE	0.367552	-0.0947326	ATP1A1
CD58	1037	4313	5350	2162257	0.00161839	0	two.sided	FALSE	TRUE	0.00655779	-0.54211	CD58
CD2	1037	4313	5350	1881205	7.72735e-18	0	two.sided	FALSE	TRUE	2.11725e-16	-0.553378	CD2
CD101	1037	4313	5350	2184768	0.000657923	0	two.sided	FALSE	TRUE	0.0029808	-0.992836	CD101
TTF2	1037	4313	5350	2244663	0.650519	0	two.sided	FALSE	TRUE	0.75966	0.111186	TTF2
MAN1A2	1037	4313	5350	2.21074e+06	0.403057	0	two.sided	FALSE	TRUE	0.549127	-0.100245	MAN1A2
TENT5C	1037	4313	5350	2.46452e+06	7.08364e-09	0	two.sided	FALSE	TRUE	8.3942e-08	0.341028	TENT5C
GDAP2	1037	4313	5350	2240000	0.838368	0	two.sided	FALSE	TRUE	0.898952	0.108183	GDAP2
WDR3	1037	4313	5350	2.21594e+06	0.0899711	0	two.sided	FALSE	TRUE	0.181079	-0.646114	WDR3
WARS2	1037	4313	5350	2260503	0.193312	0	two.sided	FALSE	TRUE	0.324546	0.243562	WARS2
AL359915.2	1037	4313	5350	2.23159e+06	0.656579	0	two.sided	FALSE	TRUE	0.764203	-0.128997	AL359915.2
PHGDH	1037	4313	5350	2.22993e+06	0.466418	0	two.sided	FALSE	TRUE	0.606947	-0.352504	PHGDH
NOTCH2	1037	4313	5350	2.20482e+06	0.0853977	0	two.sided	FALSE	TRUE	0.1736	-0.407336	NOTCH2
SEC22B	1037	4313	5350	2211504	0.269853	0	two.sided	FALSE	TRUE	0.414116	-0.17417	SEC22B
NBPF26	1037	4313	5350	2248528	0.362975	0	two.sided	FALSE	TRUE	0.50974	0.191512	NBPF26
LINC00623	1037	4313	5350	2.16873e+06	0.0060981	0	two.sided	FALSE	TRUE	0.0205392	-0.457361	LINC00623
SRGAP2C	1037	4313	5350	2224759	0.304007	0	two.sided	FALSE	TRUE	0.449685	-0.421954	SRGAP2C
AC239800.3	1037	4313	5350	2.21586e+06	0.118677	0	two.sided	FALSE	TRUE	0.223601	-0.5132	AC239800.3
NBPF15	1037	4313	5350	2.30395e+06	0.000106354	0	two.sided	FALSE	TRUE	0.000603238	0.729104	NBPF15
AC245014.3	1037	4313	5350	2.36322e+06	9.40759e-08	0	two.sided	FALSE	TRUE	9.49653e-07	0.749947	AC245014.3
NBPF20	1037	4313	5350	2.23236e+06	0.684697	0	two.sided	FALSE	TRUE	0.785838	-0.141929	NBPF20
GPR89A	1037	4313	5350	2228252	0.630789	0	two.sided	FALSE	TRUE	0.743833	-0.118218	GPR89A
CD160	1037	4313	5350	1895389	4.47212e-25	0	two.sided	FALSE	TRUE	2.03148e-23	-1.3065	CD160
RNF115	1037	4313	5350	2.39659e+06	1.94071e-06	0	two.sided	FALSE	TRUE	1.58143e-05	0.42728	RNF115
POLR3C	1037	4313	5350	2.19465e+06	0.0430611	0	two.sided	FALSE	TRUE	0.102337	-0.399237	POLR3C
NUDT17	1037	4313	5350	2221584	0.0459618	0	two.sided	FALSE	TRUE	0.107504	-1.40241	NUDT17
PIAS3	1037	4313	5350	2212185	0.138314	0	two.sided	FALSE	TRUE	0.251318	-0.333038	PIAS3
ANKRD35	1037	4313	5350	2.22488e+06	0.136392	0	two.sided	FALSE	TRUE	0.248612	-0.783315	ANKRD35
PEX11B	1037	4313	5350	2217534	0.2621	0	two.sided	FALSE	TRUE	0.404737	-0.275856	PEX11B
RBM8A	1037	4313	5350	2.41444e+06	1.43903e-05	0	two.sided	FALSE	TRUE	0.000100635	0.225138	RBM8A
LIX1L	1037	4313	5350	2.13816e+06	0.000204562	0	two.sided	FALSE	TRUE	0.00107382	-0.537874	LIX1L
POLR3GL	1037	4313	5350	2.00431e+06	4.68775e-12	0	two.sided	FALSE	TRUE	7.93318e-11	-0.730271	POLR3GL
TXNIP	1037	4313	5350	1.38422e+06	8.50938e-82	0	two.sided	FALSE	TRUE	3.26414e-79	-0.502413	TXNIP
NBPF10	1037	4313	5350	2238478	0.870476	0	two.sided	FALSE	TRUE	0.918732	0.0355136	NBPF10
NOTCH2NL	1037	4313	5350	2220460	0.0266507	0	two.sided	FALSE	TRUE	0.0698259	-1.79245	NOTCH2NL
NBPF12	1037	4313	5350	2.22019e+06	0.296655	0	two.sided	FALSE	TRUE	0.443035	-0.232999	NBPF12
PRKAB2	1037	4313	5350	2215968	0.175124	0	two.sided	FALSE	TRUE	0.301188	-0.425953	PRKAB2
AC242426.2	1037	4313	5350	2.22701e+06	0.230026	0	two.sided	FALSE	TRUE	0.370467	-0.714438	AC242426.2
CHD1L	1037	4313	5350	2217078	0.331915	0	two.sided	FALSE	TRUE	0.478248	-0.194755	CHD1L
ACP6	1037	4313	5350	2225780	0.253948	0	two.sided	FALSE	TRUE	0.396649	-0.54785	ACP6
GPR89B	1037	4313	5350	2216904	0.142395	0	two.sided	FALSE	TRUE	0.257244	-0.512711	GPR89B
NBPF11	1037	4313	5350	2239029	0.872217	0	two.sided	FALSE	TRUE	0.919913	0.00904761	NBPF11
NBPF14	1037	4313	5350	2.19015e+06	0.0207186	0	two.sided	FALSE	TRUE	0.0568279	-0.465422	NBPF14
PDE4DIP	1037	4313	5350	2.20268e+06	0.0475501	0	two.sided	FALSE	TRUE	0.110346	-0.49998	PDE4DIP
NBPF9	1037	4313	5350	2235719	0.945443	0	two.sided	FALSE	TRUE	0.967247	-0.0470632	NBPF9
AC245297.3	1037	4313	5350	2.20303e+06	0.143676	0	two.sided	FALSE	TRUE	0.258701	-0.278455	AC245297.3
NBPF19	1037	4313	5350	2273802	0.200959	0	two.sided	FALSE	TRUE	0.334243	0.122089	NBPF19
HIST2H2BF	1037	4313	5350	2.37007e+06	2.52004e-19	0	two.sided	FALSE	TRUE	7.72191e-18	1.65406	HIST2H2BF
HIST2H3D	1037	4313	5350	2245673	0.317614	0	two.sided	FALSE	TRUE	0.463184	0.445085	HIST2H3D
HIST2H2AA4	1037	4313	5350	2258598	0.0042498	0	two.sided	FALSE	TRUE	0.0150222	1.12087	HIST2H2AA4
HIST2H2BE	1037	4313	5350	2306707	4.83987e-10	0	two.sided	FALSE	TRUE	6.66577e-09	1.58874	HIST2H2BE
HIST2H2AC	1037	4313	5350	2.42151e+06	3.65686e-10	0	two.sided	FALSE	TRUE	5.11289e-09	0.674059	HIST2H2AC
HIST2H2AB	1037	4313	5350	2.34974e+06	1.07944e-11	0	two.sided	FALSE	TRUE	1.77738e-10	1.24423	HIST2H2AB
BOLA1	1037	4313	5350	2.21462e+06	0.0523577	0	two.sided	FALSE	TRUE	0.119023	-0.790517	BOLA1
SV2A	1037	4313	5350	2240912	0.546369	0	two.sided	FALSE	TRUE	0.673499	0.274353	SV2A
SF3B4	1037	4313	5350	2.19636e+06	0.243817	0	two.sided	FALSE	TRUE	0.385907	-0.118052	SF3B4
OTUD7B	1037	4313	5350	2.21173e+06	0.0428813	0	two.sided	FALSE	TRUE	0.102003	-0.768992	OTUD7B
VPS45	1037	4313	5350	2.21315e+06	0.136205	0	two.sided	FALSE	TRUE	0.248315	-0.413008	VPS45
PLEKHO1	1037	4313	5350	2292929	0.0290717	0	two.sided	FALSE	TRUE	0.0749739	0.270507	PLEKHO1
ANP32E	1037	4313	5350	2.1819e+06	0.110425	0	two.sided	FALSE	TRUE	0.211816	-0.157191	ANP32E
APH1A	1037	4313	5350	2.19498e+06	0.263503	0	two.sided	FALSE	TRUE	0.40648	-0.0826958	APH1A
C1orf54	1037	4313	5350	2.27021e+06	0.000173379	0	two.sided	FALSE	TRUE	0.000926568	1.32983	C1orf54
MRPS21	1037	4313	5350	2293580	0.123347	0	two.sided	FALSE	TRUE	0.230471	0.106505	MRPS21
PRPF3	1037	4313	5350	2297937	0.0172297	0	two.sided	FALSE	TRUE	0.0488097	0.287647	PRPF3
RPRD2	1037	4313	5350	2234824	0.953217	0	two.sided	FALSE	TRUE	0.971509	0.00439859	RPRD2
TARS2	1037	4313	5350	2.22746e+06	0.534134	0	two.sided	FALSE	TRUE	0.663153	-0.217452	TARS2
MCL1	1037	4313	5350	2624854	3.58487e-20	0	two.sided	FALSE	TRUE	1.19002e-18	0.425085	MCL1
ENSA	1037	4313	5350	2235503	0.98318	0	two.sided	FALSE	TRUE	0.989582	0.00501724	ENSA
GOLPH3L	1037	4313	5350	2.22379e+06	0.198717	0	two.sided	FALSE	TRUE	0.33143	-0.584863	GOLPH3L
CTSS	1037	4313	5350	2.17438e+06	0.0845546	0	two.sided	FALSE	TRUE	0.17249	-0.0806518	CTSS
ARNT	1037	4313	5350	2.24822e+06	0.460666	0	two.sided	FALSE	TRUE	0.60173	0.141149	ARNT
SETDB1	1037	4313	5350	2236137	0.994344	0	two.sided	FALSE	TRUE	0.99675	0.01286	SETDB1
CERS2	1037	4313	5350	2.18498e+06	0.0559664	0	two.sided	FALSE	TRUE	0.125518	-0.256262	CERS2
PRUNE1	1037	4313	5350	2.19691e+06	0.00190947	0	two.sided	FALSE	TRUE	0.00760337	-1.27308	PRUNE1
C1orf56	1037	4313	5350	2.2441e+06	0.303252	0	two.sided	FALSE	TRUE	0.449149	0.464985	C1orf56
CDC42SE1	1037	4313	5350	2168895	0.0925315	0	two.sided	FALSE	TRUE	0.184812	-0.0989948	CDC42SE1
MLLT11	1037	4313	5350	2237342	0.937902	0	two.sided	FALSE	TRUE	0.961863	-0.023447	MLLT11
GABPB2	1037	4313	5350	2203642	0.0755646	0	two.sided	FALSE	TRUE	0.158064	-0.378176	GABPB2
TNFAIP8L2	1037	4313	5350	2222180	0.0654932	0	two.sided	FALSE	TRUE	0.141818	-1.21711	TNFAIP8L2
SCNM1	1037	4313	5350	2.21725e+06	0.489844	0	two.sided	FALSE	TRUE	0.625717	-0.101613	SCNM1
VPS72	1037	4313	5350	2.1446e+06	3.17127e-06	0	two.sided	FALSE	TRUE	2.4826e-05	-1.13581	VPS72
PIP5K1A	1037	4313	5350	2.22208e+06	0.364174	0	two.sided	FALSE	TRUE	0.511077	-0.185982	PIP5K1A
PSMD4	1037	4313	5350	2.04536e+06	2.49565e-08	0	two.sided	FALSE	TRUE	2.74098e-07	-0.569307	PSMD4
ZNF687	1037	4313	5350	2.28899e+06	0.000568724	0	two.sided	FALSE	TRUE	0.00262256	0.720802	ZNF687
PI4KB	1037	4313	5350	2257086	0.399596	0	two.sided	FALSE	TRUE	0.545632	0.111722	PI4KB
RFX5	1037	4313	5350	2.21723e+06	0.279527	0	two.sided	FALSE	TRUE	0.424103	-0.283172	RFX5
PSMB4	1037	4313	5350	2.24694e+06	0.724919	0	two.sided	FALSE	TRUE	0.817775	0.0417881	PSMB4
POGZ	1037	4313	5350	2281686	0.0917482	0	two.sided	FALSE	TRUE	0.183585	0.232218	POGZ
SNX27	1037	4313	5350	2233937	0.908774	0	two.sided	FALSE	TRUE	0.943583	0.00772625	SNX27
MRPL9	1037	4313	5350	2301898	0.0389437	0	two.sided	FALSE	TRUE	0.0947474	0.190993	MRPL9
TDRKH	1037	4313	5350	2227330	0.321294	0	two.sided	FALSE	TRUE	0.467431	-0.495517	TDRKH
THEM4	1037	4313	5350	2.24386e+06	0.697028	0	two.sided	FALSE	TRUE	0.796461	0.108388	THEM4
S100A10	1037	4313	5350	2119297	0.00776608	0	two.sided	FALSE	TRUE	0.0252617	-0.0841083	S100A10
S100A11	1037	4313	5350	1940521	1.78104e-18	0	two.sided	FALSE	TRUE	5.09566e-17	-0.965517	S100A11
S100A9	1037	4313	5350	2260220	0.102162	0	two.sided	FALSE	TRUE	0.19949	1.236	S100A9
S100A12	1037	4313	5350	2262771	0.00024396	0	two.sided	FALSE	TRUE	0.00125061	1.5419	S100A12
S100A8	1037	4313	5350	2.28089e+06	0.000542626	0	two.sided	FALSE	TRUE	0.00252697	1.58844	S100A8
S100A6	1037	4313	5350	1794821	1.87453e-23	0	two.sided	FALSE	TRUE	7.70416e-22	-0.227002	S100A6
S100A4	1037	4313	5350	1640102	6.1697e-41	0	two.sided	FALSE	TRUE	6.32669e-39	-0.302871	S100A4
AL162258.2	1037	4313	5350	2230659	0.43532	0	two.sided	FALSE	TRUE	0.578768	-0.377563	AL162258.2
CHTOP	1037	4313	5350	2274872	0.0959646	0	two.sided	FALSE	TRUE	0.19044	0.215603	CHTOP
SNAPIN	1037	4313	5350	2.18336e+06	0.00385868	0	two.sided	FALSE	TRUE	0.0138381	-0.646349	SNAPIN
ILF2	1037	4313	5350	2.29523e+06	0.11182	0	two.sided	FALSE	TRUE	0.213718	0.120068	ILF2
INTS3	1037	4313	5350	2230918	0.74354	0	two.sided	FALSE	TRUE	0.832317	-0.0616037	INTS3
SLC27A3	1037	4313	5350	2196064	0.02718	0	two.sided	FALSE	TRUE	0.0710329	-0.487439	SLC27A3
GATAD2B	1037	4313	5350	2252789	0.532221	0	two.sided	FALSE	TRUE	0.661754	0.0590688	GATAD2B
DENND4B	1037	4313	5350	2.18718e+06	0.0330382	0	two.sided	FALSE	TRUE	0.083194	-0.382538	DENND4B
CRTC2	1037	4313	5350	2372687	1.64643e-06	0	two.sided	FALSE	TRUE	1.35836e-05	0.512764	CRTC2
SLC39A1	1037	4313	5350	2203404	0.0334093	0	two.sided	FALSE	TRUE	0.0839446	-0.626848	SLC39A1
JTB	1037	4313	5350	2.12939e+06	0.00913505	0	two.sided	FALSE	TRUE	0.0289776	-0.149898	JTB
RPS27	1037	4313	5350	2.60517e+06	1.44006e-16	0	two.sided	FALSE	TRUE	3.55959e-15	0.0560951	RPS27
TPM3	1037	4313	5350	2070280	0.000161258	0	two.sided	FALSE	TRUE	0.000869872	-0.0950481	TPM3
C1orf43	1037	4313	5350	2.34938e+06	0.000342916	0	two.sided	FALSE	TRUE	0.00169284	0.376543	C1orf43
UBAP2L	1037	4313	5350	2.23545e+06	0.971418	0	two.sided	FALSE	TRUE	0.982966	-0.0311478	UBAP2L
HAX1	1037	4313	5350	2186641	0.0648995	0	two.sided	FALSE	TRUE	0.140826	-0.284224	HAX1
ATP8B2	1037	4313	5350	2.14613e+06	5.18556e-05	0	two.sided	FALSE	TRUE	0.000319882	-0.772569	ATP8B2
UBE2Q1	1037	4313	5350	2.25837e+06	0.374948	0	two.sided	FALSE	TRUE	0.521674	0.0950362	UBE2Q1
ADAR	1037	4313	5350	2.17114e+06	0.10136	0	two.sided	FALSE	TRUE	0.198321	-0.106768	ADAR
PMVK	1037	4313	5350	2.20546e+06	0.160059	0	two.sided	FALSE	TRUE	0.281067	-0.241114	PMVK
AL451085.1	1037	4313	5350	2238450	0.795836	0	two.sided	FALSE	TRUE	0.868451	0.234489	AL451085.1
PBXIP1	1037	4313	5350	2.2296e+06	0.852438	0	two.sided	FALSE	TRUE	0.907556	0.00917922	PBXIP1
PYGO2	1037	4313	5350	2.22255e+06	0.357024	0	two.sided	FALSE	TRUE	0.50446	-0.249772	PYGO2
AL451085.2	1037	4313	5350	2216956	0.0979969	0	two.sided	FALSE	TRUE	0.193214	-0.604286	AL451085.2
SHC1	1037	4313	5350	2251218	0.485225	0	two.sided	FALSE	TRUE	0.621965	0.109104	SHC1
CKS1B	1037	4313	5350	2.24167e+06	0.656346	0	two.sided	FALSE	TRUE	0.764053	0.111402	CKS1B
FLAD1	1037	4313	5350	2224492	0.564273	0	two.sided	FALSE	TRUE	0.688766	-0.0932749	FLAD1
ZBTB7B	1037	4313	5350	2215733	0.11083	0	two.sided	FALSE	TRUE	0.212372	-0.558972	ZBTB7B
ADAM15	1037	4313	5350	2214129	0.169703	0	two.sided	FALSE	TRUE	0.294161	-0.33631	ADAM15
EFNA4	1037	4313	5350	2235996	0.96751	0	two.sided	FALSE	TRUE	0.980768	-0.0213741	EFNA4
SLC50A1	1037	4313	5350	2.26105e+06	0.202052	0	two.sided	FALSE	TRUE	0.335737	0.26256	SLC50A1
DPM3	1037	4313	5350	2.16942e+06	0.0174638	0	two.sided	FALSE	TRUE	0.0493111	-0.332625	DPM3
KRTCAP2	1037	4313	5350	2092123	0.000464314	0	two.sided	FALSE	TRUE	0.00220693	-0.19131	KRTCAP2
THBS3	1037	4313	5350	2239824	0.63501	0	two.sided	FALSE	TRUE	0.746855	0.34977	THBS3
MTX1	1037	4313	5350	2243455	0.737384	0	two.sided	FALSE	TRUE	0.827707	0.0469877	MTX1
GBA	1037	4313	5350	2200583	0.0365759	0	two.sided	FALSE	TRUE	0.0902374	-0.520575	GBA
FAM189B	1037	4313	5350	2.23398e+06	0.839111	0	two.sided	FALSE	TRUE	0.899562	-0.0485553	FAM189B
SCAMP3	1037	4313	5350	2131020	0.000425144	0	two.sided	FALSE	TRUE	0.00204326	-0.419667	SCAMP3
CLK2	1037	4313	5350	2.22183e+06	0.451474	0	two.sided	FALSE	TRUE	0.593993	-0.142443	CLK2
FDPS	1037	4313	5350	2.07365e+06	8.96803e-09	0	two.sided	FALSE	TRUE	1.05428e-07	-0.808058	FDPS
RUSC1	1037	4313	5350	2197465	0.0311828	0	two.sided	FALSE	TRUE	0.07941	-0.423326	RUSC1
ASH1L	1037	4313	5350	2.34388e+06	0.00164778	0	two.sided	FALSE	TRUE	0.00666382	0.24811	ASH1L
ASH1L-AS1	1037	4313	5350	2.23124e+06	0.797117	0	two.sided	FALSE	TRUE	0.869208	-0.0795646	ASH1L-AS1
MSTO1	1037	4313	5350	2.25092e+06	0.329098	0	two.sided	FALSE	TRUE	0.475512	0.21785	MSTO1
YY1AP1	1037	4313	5350	2.25471e+06	0.536162	0	two.sided	FALSE	TRUE	0.664636	0.0403078	YY1AP1
DAP3	1037	4313	5350	2137227	0.00276357	0	two.sided	FALSE	TRUE	0.0104423	-0.296334	DAP3
GON4L	1037	4313	5350	2207540	0.375603	0	two.sided	FALSE	TRUE	0.522164	-0.0679145	GON4L
SYT11	1037	4313	5350	2.16902e+06	0.0117812	0	two.sided	FALSE	TRUE	0.0357613	-0.347925	SYT11
RIT1	1037	4313	5350	2336856	6.24807e-06	0	two.sided	FALSE	TRUE	4.69603e-05	0.62689	RIT1
KHDC4	1037	4313	5350	2.25915e+06	0.247202	0	two.sided	FALSE	TRUE	0.38981	0.237551	KHDC4
ARHGEF2	1037	4313	5350	2192844	0.0313605	0	two.sided	FALSE	TRUE	0.0798037	-0.431109	ARHGEF2
SSR2	1037	4313	5350	2.20562e+06	0.477019	0	two.sided	FALSE	TRUE	0.615616	-0.0257156	SSR2
UBQLN4	1037	4313	5350	2197037	0.0154057	0	two.sided	FALSE	TRUE	0.0447925	-0.626714	UBQLN4
LAMTOR2	1037	4313	5350	2088086	2.31545e-07	0	two.sided	FALSE	TRUE	2.2001e-06	-0.677707	LAMTOR2
LMNA	1037	4313	5350	2.65814e+06	2.87651e-58	0	two.sided	FALSE	TRUE	6.20667e-56	1.79044	LMNA
SEMA4A	1037	4313	5350	2224230	0.198916	0	two.sided	FALSE	TRUE	0.33143	-0.59835	SEMA4A
SLC25A44	1037	4313	5350	2.23132e+06	0.527866	0	two.sided	FALSE	TRUE	0.658016	-0.358592	SLC25A44
PMF1	1037	4313	5350	2.2399e+06	0.775772	0	two.sided	FALSE	TRUE	0.854843	0.126593	PMF1
SMG5	1037	4313	5350	2.19191e+06	0.0455258	0	two.sided	FALSE	TRUE	0.106894	-0.310638	SMG5
TMEM79	1037	4313	5350	2220547	0.0362102	0	two.sided	FALSE	TRUE	0.0895485	-1.46431	TMEM79
GLMP	1037	4313	5350	2.17715e+06	0.00116449	0	two.sided	FALSE	TRUE	0.00489472	-0.788915	GLMP
CCT3	1037	4313	5350	2071936	1.12671e-06	0	two.sided	FALSE	TRUE	9.5886e-06	-0.485534	CCT3
C1orf61	1037	4313	5350	2243894	0.581602	0	two.sided	FALSE	TRUE	0.703204	0.109494	C1orf61
MEF2D	1037	4313	5350	2328994	0.00294993	0	two.sided	FALSE	TRUE	0.010994	0.290714	MEF2D
TTC24	1037	4313	5350	2216963	0.137537	0	two.sided	FALSE	TRUE	0.250215	-0.430636	TTC24
NAXE	1037	4313	5350	2113928	0.000155006	0	two.sided	FALSE	TRUE	0.000840082	-0.404284	NAXE
GPATCH4	1037	4313	5350	2.17182e+06	0.00147715	0	two.sided	FALSE	TRUE	0.00606133	-0.682891	GPATCH4
ISG20L2	1037	4313	5350	2253696	0.570943	0	two.sided	FALSE	TRUE	0.694318	0.010564	ISG20L2
RRNAD1	1037	4313	5350	2.21459e+06	0.078853	0	two.sided	FALSE	TRUE	0.163401	-0.566236	RRNAD1
MRPL24	1037	4313	5350	2145776	4.10978e-05	0	two.sided	FALSE	TRUE	0.000259227	-0.804521	MRPL24
HDGF	1037	4313	5350	2.24605e+06	0.751349	0	two.sided	FALSE	TRUE	0.836835	0.0350327	HDGF
PRCC	1037	4313	5350	2218918	0.459112	0	two.sided	FALSE	TRUE	0.600515	-0.138288	PRCC
SH2D2A	1037	4313	5350	2130562	0.00388112	0	two.sided	FALSE	TRUE	0.0138993	-0.241437	SH2D2A
ETV3	1037	4313	5350	2452377	7.31253e-18	0	two.sided	FALSE	TRUE	2.01425e-16	1.05034	ETV3
FCRL3	1037	4313	5350	2.02546e+06	1.14327e-13	0	two.sided	FALSE	TRUE	2.23413e-12	-1.08994	FCRL3
MNDA	1037	4313	5350	2233128	0.761647	0	two.sided	FALSE	TRUE	0.843407	-0.12551	MNDA
PYHIN1	1037	4313	5350	2.05406e+06	1.55261e-06	0	two.sided	FALSE	TRUE	1.28437e-05	-0.370407	PYHIN1
IFI16	1037	4313	5350	2190995	0.172324	0	two.sided	FALSE	TRUE	0.297808	-0.121322	IFI16
AIM2	1037	4313	5350	2.22468e+06	0.198881	0	two.sided	FALSE	TRUE	0.33143	-0.584804	AIM2
DUSP23	1037	4313	5350	2.09214e+06	1.09277e-08	0	two.sided	FALSE	TRUE	1.2674e-07	-1.01428	DUSP23
FCRL6	1037	4313	5350	1.76924e+06	3.8445e-37	0	two.sided	FALSE	TRUE	3.34601e-35	-1.29209	FCRL6
SLAMF8	1037	4313	5350	2.22316e+06	0.0659535	0	two.sided	FALSE	TRUE	0.14253	-1.13369	SLAMF8
TAGLN2	1037	4313	5350	2.06129e+06	6.67318e-05	0	two.sided	FALSE	TRUE	0.000399273	-0.148253	TAGLN2
PIGM	1037	4313	5350	2.22852e+06	0.413698	0	two.sided	FALSE	TRUE	0.558482	-0.395941	PIGM
IGSF8	1037	4313	5350	2.14563e+06	3.1342e-05	0	two.sided	FALSE	TRUE	0.000203135	-0.801306	IGSF8
PEA15	1037	4313	5350	2.26014e+06	0.193655	0	two.sided	FALSE	TRUE	0.325028	0.230768	PEA15
DCAF8	1037	4313	5350	2.30422e+06	0.00428944	0	two.sided	FALSE	TRUE	0.0151469	0.369451	DCAF8
AL139011.1	1037	4313	5350	2.25903e+06	0.00202804	0	two.sided	FALSE	TRUE	0.00802923	1.24863	AL139011.1
PEX19	1037	4313	5350	2182452	0.000830432	0	two.sided	FALSE	TRUE	0.00363669	-0.961593	PEX19
COPA	1037	4313	5350	2305067	0.0348804	0	two.sided	FALSE	TRUE	0.0868612	0.182134	COPA
NCSTN	1037	4313	5350	2134892	6.441e-07	0	two.sided	FALSE	TRUE	5.70654e-06	-1.1697	NCSTN
SLAMF6	1037	4313	5350	2021033	2.20722e-14	0	two.sided	FALSE	TRUE	4.66535e-13	-1.1958	SLAMF6
CD84	1037	4313	5350	2176893	0.0421454	0	two.sided	FALSE	TRUE	0.100599	-0.253909	CD84
SLAMF1	1037	4313	5350	2299292	6.28291e-07	0	two.sided	FALSE	TRUE	5.57601e-06	1.22451	SLAMF1
CD48	1037	4313	5350	2334838	0.0222184	0	two.sided	FALSE	TRUE	0.0603111	0.0908471	CD48
SLAMF7	1037	4313	5350	2101607	3.57206e-05	0	two.sided	FALSE	TRUE	0.000228087	-0.428627	SLAMF7
LY9	1037	4313	5350	2330809	0.00267091	0	two.sided	FALSE	TRUE	0.0101477	0.273097	LY9
CD244	1037	4313	5350	2.11369e+06	1.49666e-06	0	two.sided	FALSE	TRUE	1.24106e-05	-0.811578	CD244
F11R	1037	4313	5350	2.24513e+06	0.235127	0	two.sided	FALSE	TRUE	0.375921	0.49553	F11R
TSTD1	1037	4313	5350	2197291	0.283465	0	two.sided	FALSE	TRUE	0.42834	-0.105961	TSTD1
USF1	1037	4313	5350	2.28451e+06	0.0228666	0	two.sided	FALSE	TRUE	0.0617387	0.319984	USF1
ARHGAP30	1037	4313	5350	1.84414e+06	1.26397e-24	0	two.sided	FALSE	TRUE	5.59443e-23	-0.866394	ARHGAP30
PFDN2	1037	4313	5350	2.38991e+06	6.93918e-06	0	two.sided	FALSE	TRUE	5.18536e-05	0.388049	PFDN2
NIT1	1037	4313	5350	2208365	0.0499291	0	two.sided	FALSE	TRUE	0.114609	-0.582876	NIT1
DEDD	1037	4313	5350	2325982	0.000117561	0	two.sided	FALSE	TRUE	0.000656379	0.515749	DEDD
UFC1	1037	4313	5350	2.2055e+06	0.451135	0	two.sided	FALSE	TRUE	0.593698	-0.0452784	UFC1
USP21	1037	4313	5350	2.24923e+06	0.39103	0	two.sided	FALSE	TRUE	0.537407	0.160633	USP21
PPOX	1037	4313	5350	2.22744e+06	0.579686	0	two.sided	FALSE	TRUE	0.701544	-0.122872	PPOX
B4GALT3	1037	4313	5350	2185150	0.0543156	0	two.sided	FALSE	TRUE	0.122506	-0.238768	B4GALT3
NDUFS2	1037	4313	5350	2.23306e+06	0.903256	0	two.sided	FALSE	TRUE	0.940676	-0.0282887	NDUFS2
FCER1G	1037	4313	5350	2.25782e+06	0.033248	0	two.sided	FALSE	TRUE	0.0836815	0.887818	FCER1G
TOMM40L	1037	4313	5350	2236031	0.978385	0	two.sided	FALSE	TRUE	0.986493	-0.0466851	TOMM40L
SDHC	1037	4313	5350	2038802	6.45791e-11	0	two.sided	FALSE	TRUE	9.85045e-10	-0.834311	SDHC
AL592295.4	1037	4313	5350	2.22864e+06	0.331325	0	two.sided	FALSE	TRUE	0.477597	-0.57169	AL592295.4
HSPA6	1037	4313	5350	2.24755e+06	0.0511924	0	two.sided	FALSE	TRUE	0.116964	2.486	HSPA6
FCGR3A	1037	4313	5350	2000249	6.76855e-16	0	two.sided	FALSE	TRUE	1.61525e-14	-1.1703	FCGR3A
FCGR2B	1037	4313	5350	2229105	0.334364	0	two.sided	FALSE	TRUE	0.480573	-0.477577	FCGR2B
FCRLB	1037	4313	5350	2223373	0.115747	0	two.sided	FALSE	TRUE	0.219277	-0.93779	FCRLB
DUSP12	1037	4313	5350	2.23708e+06	0.97646	0	two.sided	FALSE	TRUE	0.98626	-0.0121033	DUSP12
ATF6	1037	4313	5350	2.20655e+06	0.149367	0	two.sided	FALSE	TRUE	0.26663	-0.306066	ATF6
UHMK1	1037	4313	5350	2.13953e+06	0.00565885	0	two.sided	FALSE	TRUE	0.0192412	-0.227168	UHMK1
UAP1	1037	4313	5350	2235852	0.986147	0	two.sided	FALSE	TRUE	0.991411	0.00850548	UAP1
HSD17B7	1037	4313	5350	2214100	0.113551	0	two.sided	FALSE	TRUE	0.216185	-0.484674	HSD17B7
NUF2	1037	4313	5350	2.23382e+06	0.729394	0	two.sided	FALSE	TRUE	0.82157	-0.293668	NUF2
MGST3	1037	4313	5350	2.06282e+06	5.94473e-08	0	two.sided	FALSE	TRUE	6.15696e-07	-0.617541	MGST3
ALDH9A1	1037	4313	5350	2213707	0.355857	0	two.sided	FALSE	TRUE	0.503293	-0.120466	ALDH9A1
TMCO1	1037	4313	5350	2.2254e+06	0.716499	0	two.sided	FALSE	TRUE	0.812079	-0.03559	TMCO1
UCK2	1037	4313	5350	2219079	0.0836082	0	two.sided	FALSE	TRUE	0.171065	-0.727174	UCK2
POGK	1037	4313	5350	2.22357e+06	0.486921	0	two.sided	FALSE	TRUE	0.623607	-0.172272	POGK
TADA1	1037	4313	5350	2229301	0.633047	0	two.sided	FALSE	TRUE	0.745731	-0.15266	TADA1
GPA33	1037	4313	5350	2.24029e+06	0.587102	0	two.sided	FALSE	TRUE	0.708366	0.199731	GPA33
POU2F1	1037	4313	5350	2281331	0.00433335	0	two.sided	FALSE	TRUE	0.0152811	0.591073	POU2F1
CD247	1037	4313	5350	2.13405e+06	0.0115019	0	two.sided	FALSE	TRUE	0.0350951	-0.17036	CD247
CREG1	1037	4313	5350	2.24522e+06	0.474362	0	two.sided	FALSE	TRUE	0.613584	0.269574	CREG1
RCSD1	1037	4313	5350	2.01135e+06	6.6616e-10	0	two.sided	FALSE	TRUE	9.00708e-09	-0.531958	RCSD1
MPZL1	1037	4313	5350	2.23579e+06	0.954398	0	two.sided	FALSE	TRUE	0.972043	-0.0543962	MPZL1
MPC2	1037	4313	5350	2327473	0.00666155	0	two.sided	FALSE	TRUE	0.0221676	0.233057	MPC2
DCAF6	1037	4313	5350	2245176	0.593925	0	two.sided	FALSE	TRUE	0.713855	0.101215	DCAF6
TIPRL	1037	4313	5350	2.31669e+06	0.00677551	0	two.sided	FALSE	TRUE	0.0224604	0.285933	TIPRL
SFT2D2	1037	4313	5350	2.2009e+06	0.196903	0	two.sided	FALSE	TRUE	0.329455	-0.130199	SFT2D2
XCL2	1037	4313	5350	2127838	0.000812695	0	two.sided	FALSE	TRUE	0.00357413	-0.176534	XCL2
XCL1	1037	4313	5350	2245286	0.641371	0	two.sided	FALSE	TRUE	0.751738	0.256716	XCL1
ATP1B1	1037	4313	5350	2271735	1.04189e-07	0	two.sided	FALSE	TRUE	1.04159e-06	2.28584	ATP1B1
NME7	1037	4313	5350	2.20309e+06	0.00465342	0	two.sided	FALSE	TRUE	0.0162548	-1.14294	NME7
BLZF1	1037	4313	5350	2204262	0.0294491	0	two.sided	FALSE	TRUE	0.0757212	-0.644382	BLZF1
SLC19A2	1037	4313	5350	2.23829e+06	0.80259	0	two.sided	FALSE	TRUE	0.871049	0.0333428	SLC19A2
C1orf112	1037	4313	5350	2.24791e+06	0.136429	0	two.sided	FALSE	TRUE	0.248635	0.667317	C1orf112
SELL	1037	4313	5350	2.10483e+06	6.68105e-06	0	two.sided	FALSE	TRUE	5.00692e-05	-0.578849	SELL
METTL18	1037	4313	5350	2.20375e+06	0.0167821	0	two.sided	FALSE	TRUE	0.047803	-0.806104	METTL18
SCYL3	1037	4313	5350	2.20988e+06	0.0379636	0	two.sided	FALSE	TRUE	0.0928744	-0.702275	SCYL3
KIFAP3	1037	4313	5350	2244793	0.732029	0	two.sided	FALSE	TRUE	0.823457	0.0412831	KIFAP3
GORAB	1037	4313	5350	2241747	0.657484	0	two.sided	FALSE	TRUE	0.764776	0.1032	GORAB
PRRC2C	1037	4313	5350	2767203	2.44944e-34	0	two.sided	FALSE	TRUE	1.8404e-32	0.432438	PRRC2C
VAMP4	1037	4313	5350	2.21364e+06	0.348086	0	two.sided	FALSE	TRUE	0.495229	-0.0731817	VAMP4
METTL13	1037	4313	5350	2217122	0.0726758	0	two.sided	FALSE	TRUE	0.153188	-0.771774	METTL13
PIGC	1037	4313	5350	2217256	0.486894	0	two.sided	FALSE	TRUE	0.623607	-0.0929901	PIGC
SUCO	1037	4313	5350	2.31973e+06	0.00628048	0	two.sided	FALSE	TRUE	0.0210917	0.329345	SUCO
FASLG	1037	4313	5350	2.24179e+06	0.676327	0	two.sided	FALSE	TRUE	0.779688	0.179048	FASLG
PRDX6	1037	4313	5350	2.27398e+06	0.321864	0	two.sided	FALSE	TRUE	0.467997	0.0675626	PRDX6
KLHL20	1037	4313	5350	2298725	0.00290195	0	two.sided	FALSE	TRUE	0.0108661	0.479285	KLHL20
CENPL	1037	4313	5350	2.22547e+06	0.271372	0	two.sided	FALSE	TRUE	0.415954	-0.41584	CENPL
DARS2	1037	4313	5350	2.23236e+06	0.611026	0	two.sided	FALSE	TRUE	0.727049	-0.298209	DARS2
ZBTB37	1037	4313	5350	2.21178e+06	0.0925397	0	two.sided	FALSE	TRUE	0.184812	-0.455268	ZBTB37
RC3H1	1037	4313	5350	2.29499e+06	0.0685044	0	two.sided	FALSE	TRUE	0.146682	0.179241	RC3H1
AL121983.2	1037	4313	5350	2.24246e+06	0.407224	0	two.sided	FALSE	TRUE	0.552913	0.366067	AL121983.2
RABGAP1L	1037	4313	5350	2.15823e+06	0.0375671	0	two.sided	FALSE	TRUE	0.0920687	-0.158299	RABGAP1L
CACYBP	1037	4313	5350	2.40668e+06	1.70903e-07	0	two.sided	FALSE	TRUE	1.66201e-06	0.47664	CACYBP
MRPS14	1037	4313	5350	2.21834e+06	0.282303	0	two.sided	FALSE	TRUE	0.427146	-0.205449	MRPS14
KIAA0040	1037	4313	5350	2202462	0.129254	0	two.sided	FALSE	TRUE	0.23885	-0.233113	KIAA0040
COP1	1037	4313	5350	2.27818e+06	0.0770725	0	two.sided	FALSE	TRUE	0.160418	0.253866	COP1
FAM20B	1037	4313	5350	2.21901e+06	0.264719	0	two.sided	FALSE	TRUE	0.408029	-0.306875	FAM20B
TOR3A	1037	4313	5350	2199854	0.0987399	0	two.sided	FALSE	TRUE	0.194272	-0.27947	TOR3A
ABL2	1037	4313	5350	2240453	0.753525	0	two.sided	FALSE	TRUE	0.838356	0.0441569	ABL2
SOAT1	1037	4313	5350	2298435	0.010025	0	two.sided	FALSE	TRUE	0.0312927	0.357404	SOAT1
TOR1AIP2	1037	4313	5350	2.26691e+06	0.116009	0	two.sided	FALSE	TRUE	0.219573	0.268639	TOR1AIP2
AL353708.3	1037	4313	5350	2.24443e+06	0.36094	0	two.sided	FALSE	TRUE	0.508	0.35879	AL353708.3
TOR1AIP1	1037	4313	5350	2391630	3.3017e-07	0	two.sided	FALSE	TRUE	3.07239e-06	0.531846	TOR1AIP1
CEP350	1037	4313	5350	2.20308e+06	0.313879	0	two.sided	FALSE	TRUE	0.459744	-0.115058	CEP350
QSOX1	1037	4313	5350	2.19872e+06	0.0221454	0	two.sided	FALSE	TRUE	0.0601521	-0.585321	QSOX1
ACBD6	1037	4313	5350	2147192	0.00225407	0	two.sided	FALSE	TRUE	0.00880296	-0.371405	ACBD6
XPR1	1037	4313	5350	2.23124e+06	0.805132	0	two.sided	FALSE	TRUE	0.873077	-0.0740951	XPR1
STX6	1037	4313	5350	2201569	0.0449324	0	two.sided	FALSE	TRUE	0.105789	-0.517715	STX6
MR1	1037	4313	5350	2.19946e+06	0.0409547	0	two.sided	FALSE	TRUE	0.0983919	-0.480972	MR1
IER5	1037	4313	5350	2.44456e+06	9.84525e-12	0	two.sided	FALSE	TRUE	1.62627e-10	0.665045	IER5
GLUL	1037	4313	5350	2171287	0.0106169	0	two.sided	FALSE	TRUE	0.0328824	-0.333099	GLUL
RNASEL	1037	4313	5350	2.22646e+06	0.312334	0	two.sided	FALSE	TRUE	0.458193	-0.451591	RNASEL
NPL	1037	4313	5350	2.22139e+06	0.0900802	0	two.sided	FALSE	TRUE	0.181193	-0.899011	NPL
DHX9	1037	4313	5350	2352433	0.000225908	0	two.sided	FALSE	TRUE	0.00117162	0.357852	DHX9
SMG7	1037	4313	5350	2267698	0.230775	0	two.sided	FALSE	TRUE	0.371312	0.170252	SMG7
ARPC5	1037	4313	5350	1.80856e+06	7.27006e-28	0	two.sided	FALSE	TRUE	3.98391e-26	-0.858402	ARPC5
COLGALT2	1037	4313	5350	2218060	0.0264299	0	two.sided	FALSE	TRUE	0.0694406	-1.27684	COLGALT2
TSEN15	1037	4313	5350	2162166	0.0028285	0	two.sided	FALSE	TRUE	0.010641	-0.448083	TSEN15
C1orf21	1037	4313	5350	2134368	0.00255915	0	two.sided	FALSE	TRUE	0.00978408	-0.264151	C1orf21
EDEM3	1037	4313	5350	2309557	0.00105005	0	two.sided	FALSE	TRUE	0.00446996	0.451225	EDEM3
FAM129A	1037	4313	5350	2.21693e+06	0.505595	0	two.sided	FALSE	TRUE	0.640249	-0.0896001	FAM129A
RNF2	1037	4313	5350	2.254e+06	0.273541	0	two.sided	FALSE	TRUE	0.418288	0.278423	RNF2
TRMT1L	1037	4313	5350	2214684	0.058218	0	two.sided	FALSE	TRUE	0.129106	-0.763471	TRMT1L
SWT1	1037	4313	5350	2229415	0.434123	0	two.sided	FALSE	TRUE	0.577919	-0.376667	SWT1
IVNS1ABP	1037	4313	5350	2397580	1.49439e-09	0	two.sided	FALSE	TRUE	1.93709e-08	0.623126	IVNS1ABP
TPR	1037	4313	5350	2.1364e+06	0.00956503	0	two.sided	FALSE	TRUE	0.0301751	-0.195472	TPR
ODR4	1037	4313	5350	2240227	0.816521	0	two.sided	FALSE	TRUE	0.88247	0.0471182	ODR4
RGS1	1037	4313	5350	2665458	1.07001e-38	0	two.sided	FALSE	TRUE	9.80719e-37	1.20458	RGS1
AL136454.1	1037	4313	5350	2.21227e+06	0.0205559	0	two.sided	FALSE	TRUE	0.0564823	-0.99862	AL136454.1
RGS2	1037	4313	5350	2487932	1.2492e-20	0	two.sided	FALSE	TRUE	4.29834e-19	1.01568	RGS2
UCHL5	1037	4313	5350	2104243	2.21891e-07	0	two.sided	FALSE	TRUE	2.11809e-06	-0.825055	UCHL5
TROVE2	1037	4313	5350	2221294	0.646326	0	two.sided	FALSE	TRUE	0.755957	-0.060245	TROVE2
GLRX2	1037	4313	5350	2.22292e+06	0.310266	0	two.sided	FALSE	TRUE	0.456128	-0.288346	GLRX2
CDC73	1037	4313	5350	2.32276e+06	0.0115332	0	two.sided	FALSE	TRUE	0.0351632	0.234893	CDC73
CFH	1037	4313	5350	2247717	0.21194	0	two.sided	FALSE	TRUE	0.348512	0.461442	CFH
ZBTB41	1037	4313	5350	2.24761e+06	0.284631	0	two.sided	FALSE	TRUE	0.429789	0.358582	ZBTB41
DENND1B	1037	4313	5350	2.2607e+06	0.329896	0	two.sided	FALSE	TRUE	0.476202	0.15254	DENND1B
NEK7	1037	4313	5350	2187833	0.0534107	0	two.sided	FALSE	TRUE	0.12086	-0.317421	NEK7
PTPRC	1037	4313	5350	1317963	4.37529e-95	0	two.sided	FALSE	TRUE	2.38499e-92	-0.420951	PTPRC
MIR181A1HG	1037	4313	5350	2.26074e+06	0.0349488	0	two.sided	FALSE	TRUE	0.0869899	0.563836	MIR181A1HG
ZNF281	1037	4313	5350	2.24408e+06	0.746797	0	two.sided	FALSE	TRUE	0.834276	0.0462983	ZNF281
DDX59	1037	4313	5350	2235919	0.984667	0	two.sided	FALSE	TRUE	0.990597	0.00418306	DDX59
KIF21B	1037	4313	5350	2212233	0.410103	0	two.sided	FALSE	TRUE	0.555406	-0.0825447	KIF21B
TMEM9	1037	4313	5350	2236838	0.970614	0	two.sided	FALSE	TRUE	0.982472	-0.0283612	TMEM9
CSRP1	1037	4313	5350	2.2499e+06	0.573888	0	two.sided	FALSE	TRUE	0.696815	0.0856705	CSRP1
IPO9	1037	4313	5350	2219306	0.372735	0	two.sided	FALSE	TRUE	0.519642	-0.18709	IPO9
TIMM17A	1037	4313	5350	2385837	4.55063e-08	0	two.sided	FALSE	TRUE	4.80437e-07	0.594099	TIMM17A
RNPEP	1037	4313	5350	2.22563e+06	0.617458	0	two.sided	FALSE	TRUE	0.732785	-0.0740095	RNPEP
ARL8A	1037	4313	5350	2.23033e+06	0.851057	0	two.sided	FALSE	TRUE	0.906475	-0.0185088	ARL8A
PTPN7	1037	4313	5350	2.3614e+06	0.000244979	0	two.sided	FALSE	TRUE	0.0012542	0.307166	PTPN7
LGR6	1037	4313	5350	2225615	0.587027	0	two.sided	FALSE	TRUE	0.708359	-0.117618	LGR6
UBE2T	1037	4313	5350	2239743	0.625081	0	two.sided	FALSE	TRUE	0.739565	0.402312	UBE2T
PPP1R12B	1037	4313	5350	2207430	0.0165628	0	two.sided	FALSE	TRUE	0.0473348	-0.952264	PPP1R12B
KDM5B	1037	4313	5350	2.2686e+06	0.0981148	0	two.sided	FALSE	TRUE	0.193336	0.298211	KDM5B
RABIF	1037	4313	5350	2224751	0.591012	0	two.sided	FALSE	TRUE	0.712006	-0.102586	RABIF
KLHL12	1037	4313	5350	2244314	0.631424	0	two.sided	FALSE	TRUE	0.744412	0.0946372	KLHL12
ADIPOR1	1037	4313	5350	2.40753e+06	4.49317e-08	0	two.sided	FALSE	TRUE	4.74855e-07	0.494144	ADIPOR1
CYB5R1	1037	4313	5350	2.21507e+06	0.200294	0	two.sided	FALSE	TRUE	0.33335	-0.269653	CYB5R1
TMEM183A	1037	4313	5350	2.35223e+06	0.000249282	0	two.sided	FALSE	TRUE	0.00127309	0.330628	TMEM183A
BTG2	1037	4313	5350	2.70577e+06	1.71743e-32	0	two.sided	FALSE	TRUE	1.15503e-30	0.756157	BTG2
ATP2B4	1037	4313	5350	1.98858e+06	2.46375e-13	0	two.sided	FALSE	TRUE	4.66492e-12	-0.772746	ATP2B4
LAX1	1037	4313	5350	2286078	0.0116141	0	two.sided	FALSE	TRUE	0.0353683	0.438554	LAX1
ZC3H11A	1037	4313	5350	2210380	0.091635	0	two.sided	FALSE	TRUE	0.183536	-0.475639	ZC3H11A
ZBED6	1037	4313	5350	2262463	0.114965	0	two.sided	FALSE	TRUE	0.218195	0.326588	ZBED6
SNRPE	1037	4313	5350	2.19031e+06	0.129929	0	two.sided	FALSE	TRUE	0.239828	-0.18606	SNRPE
SOX13	1037	4313	5350	2.21563e+06	0.0620517	0	two.sided	FALSE	TRUE	0.135728	-0.801176	SOX13
PPP1R15B	1037	4313	5350	2446159	1.05028e-15	0	two.sided	FALSE	TRUE	2.46661e-14	0.925964	PPP1R15B
PIK3C2B	1037	4313	5350	2247297	0.322401	0	two.sided	FALSE	TRUE	0.46858	0.339619	PIK3C2B
MDM4	1037	4313	5350	2488597	8.72506e-14	0	two.sided	FALSE	TRUE	1.73114e-12	0.598171	MDM4
RBBP5	1037	4313	5350	2242363	0.73805	0	two.sided	FALSE	TRUE	0.828347	0.0487178	RBBP5
DSTYK	1037	4313	5350	2236443	0.992813	0	two.sided	FALSE	TRUE	0.996083	0.000888655	DSTYK
NUAK2	1037	4313	5350	2.23211e+06	0.634112	0	two.sided	FALSE	TRUE	0.746052	-0.188976	NUAK2
ELK4	1037	4313	5350	2253723	0.541935	0	two.sided	FALSE	TRUE	0.670059	0.0639006	ELK4
NUCKS1	1037	4313	5350	2.16188e+06	0.0631634	0	two.sided	FALSE	TRUE	0.137636	-0.132532	NUCKS1
RAB29	1037	4313	5350	1.99836e+06	2.20146e-13	0	two.sided	FALSE	TRUE	4.18358e-12	-0.82548	RAB29
SLC41A1	1037	4313	5350	2251941	0.311404	0	two.sided	FALSE	TRUE	0.457347	0.265678	SLC41A1
SRGAP2	1037	4313	5350	2.23602e+06	0.977843	0	two.sided	FALSE	TRUE	0.986319	-0.0549269	SRGAP2
IKBKE	1037	4313	5350	2215240	0.343392	0	two.sided	FALSE	TRUE	0.489848	-0.141357	IKBKE
RASSF5	1037	4313	5350	2.23632e+06	0.999455	0	two.sided	FALSE	TRUE	0.999722	0.00618403	RASSF5
EIF2D	1037	4313	5350	2190226	0.0300697	0	two.sided	FALSE	TRUE	0.077011	-0.420594	EIF2D
MAPKAPK2	1037	4313	5350	2.3844e+06	6.21163e-05	0	two.sided	FALSE	TRUE	0.000375124	0.31269	MAPKAPK2
FCMR	1037	4313	5350	2003417	2.27633e-10	0	two.sided	FALSE	TRUE	3.27318e-09	-0.538311	FCMR
YOD1	1037	4313	5350	2.24119e+06	0.691649	0	two.sided	FALSE	TRUE	0.791705	0.0745352	YOD1
CD55	1037	4313	5350	2464869	1.53558e-11	0	two.sided	FALSE	TRUE	2.49279e-10	0.552531	CD55
CD46	1037	4313	5350	2.20175e+06	0.306727	0	two.sided	FALSE	TRUE	0.452532	-0.114965	CD46
MIR29B2CHG	1037	4313	5350	2.27487e+06	0.00130431	0	two.sided	FALSE	TRUE	0.00541868	0.872583	MIR29B2CHG
G0S2	1037	4313	5350	2263959	8.67434e-08	0	two.sided	FALSE	TRUE	8.79062e-07	2.49897	G0S2
TRAF3IP3	1037	4313	5350	1886891	7.81063e-18	0	two.sided	FALSE	TRUE	2.13442e-16	-0.550703	TRAF3IP3
UTP25	1037	4313	5350	2230639	0.652787	0	two.sided	FALSE	TRUE	0.761535	-0.152006	UTP25
HHAT	1037	4313	5350	2232547	0.656252	0	two.sided	FALSE	TRUE	0.764029	-0.166929	HHAT
RCOR3	1037	4313	5350	2.22245e+06	0.561168	0	two.sided	FALSE	TRUE	0.685621	-0.111473	RCOR3
TRAF5	1037	4313	5350	2222883	0.544718	0	two.sided	FALSE	TRUE	0.672512	-0.057305	TRAF5
LPGAT1	1037	4313	5350	2173353	0.0325235	0	two.sided	FALSE	TRUE	0.0821283	-0.285367	LPGAT1
INTS7	1037	4313	5350	2201567	0.00407066	0	two.sided	FALSE	TRUE	0.014478	-1.17855	INTS7
PPP2R5A	1037	4313	5350	2.26071e+06	0.458949	0	two.sided	FALSE	TRUE	0.600396	0.0527465	PPP2R5A
TMEM206	1037	4313	5350	2.18851e+06	0.000844489	0	two.sided	FALSE	TRUE	0.00369357	-1.1593	TMEM206
NENF	1037	4313	5350	2167372	0.0381458	0	two.sided	FALSE	TRUE	0.0932222	-0.196683	NENF
ATF3	1037	4313	5350	2.5512e+06	2.37006e-51	0	two.sided	FALSE	TRUE	3.77641e-49	2.43243	ATF3
NSL1	1037	4313	5350	2.18455e+06	0.0241155	0	two.sided	FALSE	TRUE	0.0644055	-0.418472	NSL1
TATDN3	1037	4313	5350	2216976	0.21642	0	two.sided	FALSE	TRUE	0.353097	-0.332523	TATDN3
FLVCR1-DT	1037	4313	5350	2.22212e+06	0.0521214	0	two.sided	FALSE	TRUE	0.118564	-1.18018	FLVCR1-DT
FLVCR1	1037	4313	5350	2.21924e+06	0.0506914	0	two.sided	FALSE	TRUE	0.11603	-1.08788	FLVCR1
ANGEL2	1037	4313	5350	2275898	0.118746	0	two.sided	FALSE	TRUE	0.223691	0.198433	ANGEL2
RPS6KC1	1037	4313	5350	2220060	0.32742	0	two.sided	FALSE	TRUE	0.473484	-0.255191	RPS6KC1
SMYD2	1037	4313	5350	2.1894e+06	0.041492	0	two.sided	FALSE	TRUE	0.0993831	-0.329982	SMYD2
CENPF	1037	4313	5350	2235163	0.889045	0	two.sided	FALSE	TRUE	0.93112	0.104506	CENPF
GPATCH2	1037	4313	5350	2223520	0.440143	0	two.sided	FALSE	TRUE	0.583085	-0.160862	GPATCH2
RRP15	1037	4313	5350	2.23098e+06	0.781603	0	two.sided	FALSE	TRUE	0.858892	-0.0462	RRP15
LYPLAL1	1037	4313	5350	2227877	0.542025	0	two.sided	FALSE	TRUE	0.670059	-0.198647	LYPLAL1
ZC3H11B	1037	4313	5350	2255923	0.0118643	0	two.sided	FALSE	TRUE	0.0359715	1.00463	ZC3H11B
EPRS	1037	4313	5350	2.1237e+06	0.000148281	0	two.sided	FALSE	TRUE	0.000809137	-0.465501	EPRS
BPNT1	1037	4313	5350	2.18838e+06	9.89451e-05	0	two.sided	FALSE	TRUE	0.000564303	-1.66268	BPNT1
IARS2	1037	4313	5350	2.22899e+06	0.76121	0	two.sided	FALSE	TRUE	0.843283	-0.0321874	IARS2
RAB3GAP2	1037	4313	5350	2.28442e+06	0.0359297	0	two.sided	FALSE	TRUE	0.0890462	0.30285	RAB3GAP2
DUSP10	1037	4313	5350	2.61655e+06	6.96377e-42	0	two.sided	FALSE	TRUE	7.51289e-40	1.33612	DUSP10
TAF1A	1037	4313	5350	2.24592e+06	0.252077	0	two.sided	FALSE	TRUE	0.394613	0.500238	TAF1A
MIA3	1037	4313	5350	2346273	0.00052825	0	two.sided	FALSE	TRUE	0.00247225	0.370161	MIA3
AIDA	1037	4313	5350	2.18664e+06	0.0350912	0	two.sided	FALSE	TRUE	0.0872605	-0.367831	AIDA
BROX	1037	4313	5350	2.30092e+06	0.0190704	0	two.sided	FALSE	TRUE	0.0529807	0.270742	BROX
AL392172.1	1037	4313	5350	2235859	0.977214	0	two.sided	FALSE	TRUE	0.98626	-0.0509819	AL392172.1
CAPN2	1037	4313	5350	2.01078e+06	1.50767e-08	0	two.sided	FALSE	TRUE	1.70842e-07	-0.372746	CAPN2
TP53BP2	1037	4313	5350	2.44296e+06	4.25473e-13	0	two.sided	FALSE	TRUE	7.92557e-12	0.762041	TP53BP2
FBXO28	1037	4313	5350	2.32763e+06	0.000124095	0	two.sided	FALSE	TRUE	0.000687667	0.495179	FBXO28
DEGS1	1037	4313	5350	2266379	0.231315	0	two.sided	FALSE	TRUE	0.37195	0.172347	DEGS1
NVL	1037	4313	5350	2189790	0.00298055	0	two.sided	FALSE	TRUE	0.0110842	-0.845479	NVL
CNIH4	1037	4313	5350	2231087	0.827097	0	two.sided	FALSE	TRUE	0.889815	-0.0368194	CNIH4
WDR26	1037	4313	5350	2.32613e+06	0.000318125	0	two.sided	FALSE	TRUE	0.00158177	0.491226	WDR26
CNIH3	1037	4313	5350	2.22641e+06	0.184335	0	two.sided	FALSE	TRUE	0.313183	-0.840259	CNIH3
LBR	1037	4313	5350	2228252	0.821732	0	two.sided	FALSE	TRUE	0.885883	-0.011147	LBR
SRP9	1037	4313	5350	2128578	0.00417033	0	two.sided	FALSE	TRUE	0.0147817	-0.222252	SRP9
TMEM63A	1037	4313	5350	2.26199e+06	0.195977	0	two.sided	FALSE	TRUE	0.32833	0.257265	TMEM63A
PYCR2	1037	4313	5350	2.21182e+06	0.047546	0	two.sided	FALSE	TRUE	0.110346	-0.720435	PYCR2
SDE2	1037	4313	5350	2359347	3.01385e-05	0	two.sided	FALSE	TRUE	0.00019607	0.412363	SDE2
H3F3A	1037	4313	5350	1681971	3.33889e-36	0	two.sided	FALSE	TRUE	2.8345e-34	-0.309576	H3F3A
ACBD3	1037	4313	5350	2385532	5.85611e-07	0	two.sided	FALSE	TRUE	5.21511e-06	0.522755	ACBD3
LIN9	1037	4313	5350	2.21839e+06	0.0161749	0	two.sided	FALSE	TRUE	0.0464955	-1.86212	LIN9
PARP1	1037	4313	5350	1.93991e+06	1.18918e-19	0	two.sided	FALSE	TRUE	3.76646e-18	-1.09046	PARP1
ITPKB	1037	4313	5350	2.31036e+06	0.0057575	0	two.sided	FALSE	TRUE	0.0195126	0.368969	ITPKB
PSEN2	1037	4313	5350	2245052	0.214902	0	two.sided	FALSE	TRUE	0.351229	0.562886	PSEN2
COQ8A	1037	4313	5350	2239185	0.875553	0	two.sided	FALSE	TRUE	0.921836	0.0482274	COQ8A
ZNF678	1037	4313	5350	2201347	0.00707525	0	two.sided	FALSE	TRUE	0.0233445	-0.994708	ZNF678
SNAP47	1037	4313	5350	2.18181e+06	0.0137591	0	two.sided	FALSE	TRUE	0.040715	-0.469827	SNAP47
JMJD4	1037	4313	5350	2.19297e+06	0.00660546	0	two.sided	FALSE	TRUE	0.022026	-0.778231	JMJD4
ARF1	1037	4313	5350	2445014	1.40399e-06	0	two.sided	FALSE	TRUE	1.17618e-05	0.176143	ARF1
C1orf35	1037	4313	5350	2289049	0.0188443	0	two.sided	FALSE	TRUE	0.0524189	0.348949	C1orf35
MRPL55	1037	4313	5350	2280688	0.134203	0	two.sided	FALSE	TRUE	0.245617	0.16174	MRPL55
GUK1	1037	4313	5350	2312091	0.0813317	0	two.sided	FALSE	TRUE	0.167599	0.0600085	GUK1
IBA57	1037	4313	5350	2.23242e+06	0.741172	0	two.sided	FALSE	TRUE	0.83113	-0.154054	IBA57
OBSCN	1037	4313	5350	2249528	0.0955508	0	two.sided	FALSE	TRUE	0.189873	0.670286	OBSCN
TRIM11	1037	4313	5350	2.2773e+06	0.0792963	0	two.sided	FALSE	TRUE	0.164156	0.222768	TRIM11
HIST3H2A	1037	4313	5350	2247025	0.640194	0	two.sided	FALSE	TRUE	0.75082	0.0916528	HIST3H2A
RNF187	1037	4313	5350	2.06673e+06	1.06538e-07	0	two.sided	FALSE	TRUE	1.06301e-06	-0.639467	RNF187
RHOU	1037	4313	5350	2239158	0.755648	0	two.sided	FALSE	TRUE	0.839546	0.110693	RHOU
RAB4A	1037	4313	5350	2247575	0.701973	0	two.sided	FALSE	TRUE	0.800168	0.0471285	RAB4A
CCSAP	1037	4313	5350	2255662	0.152214	0	two.sided	FALSE	TRUE	0.270463	0.364891	CCSAP
NUP133	1037	4313	5350	2.21922e+06	0.514742	0	two.sided	FALSE	TRUE	0.647695	-0.114999	NUP133
ABCB10	1037	4313	5350	2.21127e+06	0.0398538	0	two.sided	FALSE	TRUE	0.0963439	-0.733023	ABCB10
TAF5L	1037	4313	5350	2211548	0.128934	0	two.sided	FALSE	TRUE	0.238331	-0.370658	TAF5L
URB2	1037	4313	5350	2211704	0.018349	0	two.sided	FALSE	TRUE	0.0513762	-1.09554	URB2
GALNT2	1037	4313	5350	2.22651e+06	0.554408	0	two.sided	FALSE	TRUE	0.68009	-0.0456924	GALNT2
COG2	1037	4313	5350	2219841	0.374064	0	two.sided	FALSE	TRUE	0.521144	-0.174455	COG2
TTC13	1037	4313	5350	2152983	7.21594e-05	0	two.sided	FALSE	TRUE	0.000428038	-0.841713	TTC13
ARV1	1037	4313	5350	2.20702e+06	0.0333981	0	two.sided	FALSE	TRUE	0.0839446	-0.692016	ARV1
FAM89A	1037	4313	5350	2.23631e+06	0.998562	0	two.sided	FALSE	TRUE	0.999527	-0.0543962	FAM89A
C1orf131	1037	4313	5350	2.18067e+06	0.00296147	0	two.sided	FALSE	TRUE	0.0110252	-0.690305	C1orf131
GNPAT	1037	4313	5350	2218208	0.479967	0	two.sided	FALSE	TRUE	0.616908	-0.0971276	GNPAT
EXOC8	1037	4313	5350	2.27728e+06	0.0961819	0	two.sided	FALSE	TRUE	0.190719	0.22202	EXOC8
SPRTN	1037	4313	5350	2243374	0.783558	0	two.sided	FALSE	TRUE	0.860298	0.0113702	SPRTN
EGLN1	1037	4313	5350	2208864	0.235501	0	two.sided	FALSE	TRUE	0.376344	-0.237469	EGLN1
TSNAX	1037	4313	5350	2224101	0.165527	0	two.sided	FALSE	TRUE	0.289052	-0.605986	TSNAX
NTPCR	1037	4313	5350	2.19687e+06	0.0171663	0	two.sided	FALSE	TRUE	0.0486596	-0.57006	NTPCR
PCNX2	1037	4313	5350	2.31542e+06	0.000307494	0	two.sided	FALSE	TRUE	0.00153185	0.521073	PCNX2
AL355472.1	1037	4313	5350	2254833	0.358298	0	two.sided	FALSE	TRUE	0.50564	0.179903	AL355472.1
COA6	1037	4313	5350	2.22511e+06	0.608828	0	two.sided	FALSE	TRUE	0.725369	-0.0515512	COA6
TARBP1	1037	4313	5350	2246074	0.532103	0	two.sided	FALSE	TRUE	0.661742	0.160465	TARBP1
IRF2BP2	1037	4313	5350	2.56262e+06	5.78108e-22	0	two.sided	FALSE	TRUE	2.19321e-20	0.779577	IRF2BP2
AL160408.2	1037	4313	5350	2.25694e+06	0.0317931	0	two.sided	FALSE	TRUE	0.0806271	0.728429	AL160408.2
TOMM20	1037	4313	5350	2.55857e+06	9.22785e-15	0	two.sided	FALSE	TRUE	2.01206e-13	0.372187	TOMM20
RBM34	1037	4313	5350	2302127	0.0201873	0	two.sided	FALSE	TRUE	0.0556509	0.273796	RBM34
ARID4B	1037	4313	5350	2.73506e+06	1.40788e-32	0	two.sided	FALSE	TRUE	9.53036e-31	0.542727	ARID4B
GGPS1	1037	4313	5350	2.25212e+06	0.0369864	0	two.sided	FALSE	TRUE	0.0910151	0.852193	GGPS1
B3GALNT2	1037	4313	5350	2227669	0.396268	0	two.sided	FALSE	TRUE	0.542231	-0.348175	B3GALNT2
LYST	1037	4313	5350	2.21982e+06	0.666745	0	two.sided	FALSE	TRUE	0.772508	-0.0335784	LYST
GPR137B	1037	4313	5350	2.28923e+06	0.0287728	0	two.sided	FALSE	TRUE	0.0743697	0.291041	GPR137B
ERO1B	1037	4313	5350	2330981	8.00412e-05	0	two.sided	FALSE	TRUE	0.000469947	0.533893	ERO1B
EDARADD	1037	4313	5350	2.2536e+06	0.163831	0	two.sided	FALSE	TRUE	0.286719	0.382109	EDARADD
LGALS8	1037	4313	5350	2.30055e+06	0.00905708	0	two.sided	FALSE	TRUE	0.0287655	0.373996	LGALS8
HEATR1	1037	4313	5350	2301097	0.00725415	0	two.sided	FALSE	TRUE	0.0238512	0.37496	HEATR1
MTR	1037	4313	5350	2.24357e+06	0.76662	0	two.sided	FALSE	TRUE	0.847463	0.0571565	MTR
CHRM3-AS2	1037	4313	5350	2.262e+06	0.00321709	0	two.sided	FALSE	TRUE	0.0118196	0.995923	CHRM3-AS2
FH	1037	4313	5350	2.22693e+06	0.570021	0	two.sided	FALSE	TRUE	0.693969	-0.160364	FH
OPN3	1037	4313	5350	2.22234e+06	0.0945514	0	two.sided	FALSE	TRUE	0.188212	-0.973191	OPN3
CEP170	1037	4313	5350	2.2619e+06	0.0721977	0	two.sided	FALSE	TRUE	0.152522	0.441688	CEP170
SDCCAG8	1037	4313	5350	2.21938e+06	0.360708	0	two.sided	FALSE	TRUE	0.507884	-0.221998	SDCCAG8
AKT3	1037	4313	5350	2.34575e+06	1.69296e-06	0	two.sided	FALSE	TRUE	1.39269e-05	0.656089	AKT3
ZBTB18	1037	4313	5350	2.25558e+06	0.0238567	0	two.sided	FALSE	TRUE	0.0639285	0.869307	ZBTB18
ADSS	1037	4313	5350	2.16646e+06	0.0367008	0	two.sided	FALSE	TRUE	0.0905024	-0.182869	ADSS
DESI2	1037	4313	5350	2228179	0.73125	0	two.sided	FALSE	TRUE	0.823034	-0.0750948	DESI2
COX20	1037	4313	5350	2.09374e+06	3.59236e-06	0	two.sided	FALSE	TRUE	2.78906e-05	-0.520456	COX20
HNRNPU	1037	4313	5350	2.44607e+06	1.38641e-06	0	two.sided	FALSE	TRUE	1.16362e-05	0.171877	HNRNPU
AL356512.1	1037	4313	5350	2264704	0.00668426	0	two.sided	FALSE	TRUE	0.0222315	0.831884	AL356512.1
EFCAB2	1037	4313	5350	2250893	0.318529	0	two.sided	FALSE	TRUE	0.464321	0.248887	EFCAB2
SMYD3	1037	4313	5350	2257608	0.327103	0	two.sided	FALSE	TRUE	0.47326	0.113625	SMYD3
TFB2M	1037	4313	5350	2.21202e+06	0.195901	0	two.sided	FALSE	TRUE	0.328255	-0.215586	TFB2M
CNST	1037	4313	5350	2.36738e+06	6.38609e-05	0	two.sided	FALSE	TRUE	0.000384093	0.366354	CNST
SCCPDH	1037	4313	5350	2.20903e+06	0.0873472	0	two.sided	FALSE	TRUE	0.176829	-0.467471	SCCPDH
AHCTF1	1037	4313	5350	2298396	0.00892155	0	two.sided	FALSE	TRUE	0.0283873	0.37109	AHCTF1
ZNF669	1037	4313	5350	2.20432e+06	0.0674817	0	two.sided	FALSE	TRUE	0.144911	-0.383453	ZNF669
ZNF124	1037	4313	5350	2212328	0.0474372	0	two.sided	FALSE	TRUE	0.110159	-0.687528	ZNF124
AL390728.6	1037	4313	5350	2.22767e+06	0.4692	0	two.sided	FALSE	TRUE	0.609343	-0.288899	AL390728.6
AL390728.5	1037	4313	5350	2220432	0.0851938	0	two.sided	FALSE	TRUE	0.173316	-0.875007	AL390728.5
ZNF496	1037	4313	5350	2.24363e+06	0.609793	0	two.sided	FALSE	TRUE	0.72603	0.10171	ZNF496
NLRP3	1037	4313	5350	2.2709e+06	5.10049e-06	0	two.sided	FALSE	TRUE	3.8757e-05	1.8524	NLRP3
SH3BP5L	1037	4313	5350	2235657	0.948985	0	two.sided	FALSE	TRUE	0.968625	0.0234974	SH3BP5L
ZNF672	1037	4313	5350	2.21332e+06	0.0886587	0	two.sided	FALSE	TRUE	0.179133	-0.554828	ZNF672
ZNF692	1037	4313	5350	2.21771e+06	0.243162	0	two.sided	FALSE	TRUE	0.385139	-0.293114	ZNF692
SH3YL1	1037	4313	5350	2.33971e+06	1.47614e-10	0	two.sided	FALSE	TRUE	2.17473e-09	1.15643	SH3YL1
ACP1	1037	4313	5350	2.19612e+06	0.25899	0	two.sided	FALSE	TRUE	0.40149	-0.0899552	ACP1
TMEM18	1037	4313	5350	2212012	0.302851	0	two.sided	FALSE	TRUE	0.448841	-0.159227	TMEM18
EIPR1	1037	4313	5350	2195228	0.0300115	0	two.sided	FALSE	TRUE	0.0768999	-0.47294	EIPR1
TRAPPC12	1037	4313	5350	2.17333e+06	0.00130186	0	two.sided	FALSE	TRUE	0.00541064	-0.740097	TRAPPC12
ADI1	1037	4313	5350	2210419	0.17798	0	two.sided	FALSE	TRUE	0.305087	-0.31927	ADI1
RNASEH1	1037	4313	5350	2.25281e+06	0.536574	0	two.sided	FALSE	TRUE	0.664945	0.104808	RNASEH1
RNASEH1-AS1	1037	4313	5350	2233204	0.777641	0	two.sided	FALSE	TRUE	0.856082	-0.161283	RNASEH1-AS1
RPS7	1037	4313	5350	2381956	0.00108973	0	two.sided	FALSE	TRUE	0.00461231	0.0259399	RPS7
CMPK2	1037	4313	5350	2259681	0.0180682	0	two.sided	FALSE	TRUE	0.0507408	0.76033	CMPK2
RSAD2	1037	4313	5350	2251935	0.0146707	0	two.sided	FALSE	TRUE	0.0430194	1.47479	RSAD2
RNF144A	1037	4313	5350	2.22209e+06	0.374245	0	two.sided	FALSE	TRUE	0.521256	-0.213366	RNF144A
LINC01871	1037	4313	5350	2170534	0.00940422	0	two.sided	FALSE	TRUE	0.0297161	-0.409591	LINC01871
ID2	1037	4313	5350	2.40922e+06	6.6426e-06	0	two.sided	FALSE	TRUE	4.98171e-05	0.35411	ID2
KIDINS220	1037	4313	5350	2150735	0.000977274	0	two.sided	FALSE	TRUE	0.00421383	-0.486555	KIDINS220
ITGB1BP1	1037	4313	5350	2071294	6.15894e-07	0	two.sided	FALSE	TRUE	5.47068e-06	-0.522383	ITGB1BP1
CPSF3	1037	4313	5350	2.22263e+06	0.439059	0	two.sided	FALSE	TRUE	0.582021	-0.133926	CPSF3
IAH1	1037	4313	5350	2201859	0.206497	0	two.sided	FALSE	TRUE	0.341153	-0.186683	IAH1
ADAM17	1037	4313	5350	2218566	0.417061	0	two.sided	FALSE	TRUE	0.561677	-0.149316	ADAM17
YWHAQ	1037	4313	5350	2.0365e+06	1.29876e-06	0	two.sided	FALSE	TRUE	1.0936e-05	-0.28169	YWHAQ
TAF1B	1037	4313	5350	2.17488e+06	0.00124907	0	two.sided	FALSE	TRUE	0.00521849	-0.686715	TAF1B
KLF11	1037	4313	5350	2217027	0.180655	0	two.sided	FALSE	TRUE	0.308448	-0.349154	KLF11
HPCAL1	1037	4313	5350	2193431	0.0768554	0	two.sided	FALSE	TRUE	0.160085	-0.257373	HPCAL1
ODC1	1037	4313	5350	2426291	5.14387e-07	0	two.sided	FALSE	TRUE	4.62056e-06	0.341124	ODC1
NOL10	1037	4313	5350	2276327	0.0300276	0	two.sided	FALSE	TRUE	0.076922	0.338495	NOL10
PDIA6	1037	4313	5350	2.09777e+06	0.000112915	0	two.sided	FALSE	TRUE	0.000634884	-0.349282	PDIA6
PQLC3	1037	4313	5350	2.08333e+06	2.61844e-09	0	two.sided	FALSE	TRUE	3.28319e-08	-1.01962	PQLC3
ROCK2	1037	4313	5350	2.17876e+06	0.00163318	0	two.sided	FALSE	TRUE	0.0066121	-0.766911	ROCK2
E2F6	1037	4313	5350	2.22532e+06	0.326178	0	two.sided	FALSE	TRUE	0.472611	-0.364849	E2F6
LPIN1	1037	4313	5350	2307865	0.013492	0	two.sided	FALSE	TRUE	0.0400278	0.258412	LPIN1
TRIB2	1037	4313	5350	2242769	0.742631	0	two.sided	FALSE	TRUE	0.831968	0.0446189	TRIB2
NBAS	1037	4313	5350	2.22527e+06	0.622028	0	two.sided	FALSE	TRUE	0.736773	-0.0559948	NBAS
DDX1	1037	4313	5350	2253034	0.408432	0	two.sided	FALSE	TRUE	0.553972	0.155563	DDX1
FAM49A	1037	4313	5350	2249622	0.438275	0	two.sided	FALSE	TRUE	0.581354	0.182255	FAM49A
SMC6	1037	4313	5350	2190506	0.0132346	0	two.sided	FALSE	TRUE	0.0393767	-0.587756	SMC6
GEN1	1037	4313	5350	2231239	0.501571	0	two.sided	FALSE	TRUE	0.636615	-0.402168	GEN1
RDH14	1037	4313	5350	2234771	0.942124	0	two.sided	FALSE	TRUE	0.964855	-0.0405422	RDH14
LINC00954	1037	4313	5350	2.21415e+06	0.0212923	0	two.sided	FALSE	TRUE	0.058094	-1.15179	LINC00954
TTC32	1037	4313	5350	2215547	0.308563	0	two.sided	FALSE	TRUE	0.454464	-0.191637	TTC32
WDR35	1037	4313	5350	2.22524e+06	0.31174	0	two.sided	FALSE	TRUE	0.457644	-0.390929	WDR35
LAPTM4A	1037	4313	5350	2.29477e+06	0.0941798	0	two.sided	FALSE	TRUE	0.187581	0.18727	LAPTM4A
PUM2	1037	4313	5350	2.29399e+06	0.0727205	0	two.sided	FALSE	TRUE	0.153207	0.185787	PUM2
RHOB	1037	4313	5350	2.52742e+06	1.55935e-19	0	two.sided	FALSE	TRUE	4.84991e-18	1.25225	RHOB
HS1BP3	1037	4313	5350	2193106	0.00677417	0	two.sided	FALSE	TRUE	0.0224604	-0.745435	HS1BP3
LDAH	1037	4313	5350	2.23833e+06	0.861639	0	two.sided	FALSE	TRUE	0.912754	0.0339031	LDAH
ATAD2B	1037	4313	5350	2.26486e+06	0.288562	0	two.sided	FALSE	TRUE	0.433891	0.152314	ATAD2B
UBXN2A	1037	4313	5350	2.26941e+06	0.141843	0	two.sided	FALSE	TRUE	0.256471	0.253159	UBXN2A
WDCP	1037	4313	5350	2228116	0.30335	0	two.sided	FALSE	TRUE	0.449149	-0.655143	WDCP
FKBP1B	1037	4313	5350	2.24083e+06	0.533963	0	two.sided	FALSE	TRUE	0.6631	0.301683	FKBP1B
SF3B6	1037	4313	5350	2.30139e+06	0.0971376	0	two.sided	FALSE	TRUE	0.192142	0.110739	SF3B6
FAM228B	1037	4313	5350	2.2161e+06	0.306664	0	two.sided	FALSE	TRUE	0.452503	-0.17055	FAM228B
ITSN2	1037	4313	5350	2256006	0.596467	0	two.sided	FALSE	TRUE	0.715766	0.0638169	ITSN2
NCOA1	1037	4313	5350	2.13282e+06	0.000237372	0	two.sided	FALSE	TRUE	0.00122251	-0.463684	NCOA1
PTRHD1	1037	4313	5350	2.17218e+06	0.047646	0	two.sided	FALSE	TRUE	0.110544	-0.213207	PTRHD1
CENPO	1037	4313	5350	2.21449e+06	0.041206	0	two.sided	FALSE	TRUE	0.0988353	-0.842326	CENPO
DNAJC27	1037	4313	5350	2270192	0.0396895	0	two.sided	FALSE	TRUE	0.0960269	0.453164	DNAJC27
POMC	1037	4313	5350	2.20794e+06	0.137778	0	two.sided	FALSE	TRUE	0.250565	-0.27407	POMC
DNMT3A	1037	4313	5350	2.2345e+06	0.926608	0	two.sided	FALSE	TRUE	0.955103	-0.0330585	DNMT3A
DTNB	1037	4313	5350	2246565	0.550261	0	two.sided	FALSE	TRUE	0.676851	0.0987351	DTNB
ASXL2	1037	4313	5350	2153904	0.000321972	0	two.sided	FALSE	TRUE	0.00159706	-0.659613	ASXL2
RAB10	1037	4313	5350	2203926	0.257801	0	two.sided	FALSE	TRUE	0.400427	-0.134234	RAB10
GAREM2	1037	4313	5350	2223020	0.136523	0	two.sided	FALSE	TRUE	0.248719	-0.780728	GAREM2
HADHA	1037	4313	5350	2136479	0.00457815	0	two.sided	FALSE	TRUE	0.0160248	-0.253383	HADHA
HADHB	1037	4313	5350	2209788	0.242243	0	two.sided	FALSE	TRUE	0.384037	-0.135886	HADHB
SELENOI	1037	4313	5350	2.24996e+06	0.451586	0	two.sided	FALSE	TRUE	0.594065	0.102801	SELENOI
SLC35F6	1037	4313	5350	2260782	0.0750858	0	two.sided	FALSE	TRUE	0.157326	0.506245	SLC35F6
TMEM214	1037	4313	5350	2.22009e+06	0.362012	0	two.sided	FALSE	TRUE	0.508733	-0.225281	TMEM214
AGBL5	1037	4313	5350	2.25233e+06	0.122096	0	two.sided	FALSE	TRUE	0.22867	0.483925	AGBL5
OST4	1037	4313	5350	2140932	0.0275978	0	two.sided	FALSE	TRUE	0.0718622	-0.0698314	OST4
KHK	1037	4313	5350	2238830	0.749185	0	two.sided	FALSE	TRUE	0.835593	0.129068	KHK
PREB	1037	4313	5350	2.19442e+06	0.0282082	0	two.sided	FALSE	TRUE	0.0732027	-0.507669	PREB
SLC5A6	1037	4313	5350	2.27888e+06	0.0223086	0	two.sided	FALSE	TRUE	0.0605002	0.427362	SLC5A6
ATRAID	1037	4313	5350	2131104	0.00285281	0	two.sided	FALSE	TRUE	0.0107169	-0.255354	ATRAID
CAD	1037	4313	5350	2.23062e+06	0.646199	0	two.sided	FALSE	TRUE	0.755957	-0.123348	CAD
MPV17	1037	4313	5350	2143737	9.2385e-05	0	two.sided	FALSE	TRUE	0.000533946	-0.687979	MPV17
GTF3C2	1037	4313	5350	2.25837e+06	0.254612	0	two.sided	FALSE	TRUE	0.397321	0.199287	GTF3C2
AC074117.1	1037	4313	5350	2.22107e+06	0.040802	0	two.sided	FALSE	TRUE	0.0981317	-1.4337	AC074117.1
EIF2B4	1037	4313	5350	2.26519e+06	0.123553	0	two.sided	FALSE	TRUE	0.23069	0.266322	EIF2B4
SNX17	1037	4313	5350	2000036	3.15724e-13	0	two.sided	FALSE	TRUE	5.93457e-12	-0.859562	SNX17
ZNF513	1037	4313	5350	2233551	0.853994	0	two.sided	FALSE	TRUE	0.908279	-0.109291	ZNF513
PPM1G	1037	4313	5350	2.11412e+06	0.000983208	0	two.sided	FALSE	TRUE	0.00423237	-0.24867	PPM1G
NRBP1	1037	4313	5350	2397986	2.3267e-06	0	two.sided	FALSE	TRUE	1.86948e-05	0.377326	NRBP1
IFT172	1037	4313	5350	2.22689e+06	0.316504	0	two.sided	FALSE	TRUE	0.462345	-0.489863	IFT172
ZNF512	1037	4313	5350	2.17602e+06	0.000193562	0	two.sided	FALSE	TRUE	0.00102282	-1.11337	ZNF512
GPN1	1037	4313	5350	2.25089e+06	0.50741	0	two.sided	FALSE	TRUE	0.641466	0.0723345	GPN1
SUPT7L	1037	4313	5350	2284793	0.0749689	0	two.sided	FALSE	TRUE	0.157145	0.209434	SUPT7L
SLC4A1AP	1037	4313	5350	2.19997e+06	0.124089	0	two.sided	FALSE	TRUE	0.23119	-0.221462	SLC4A1AP
MRPL33	1037	4313	5350	2249607	0.697743	0	two.sided	FALSE	TRUE	0.797102	0.0491517	MRPL33
RBKS	1037	4313	5350	2.27533e+06	0.00279021	0	two.sided	FALSE	TRUE	0.0105237	0.74986	RBKS
BABAM2	1037	4313	5350	2.24193e+06	0.801317	0	two.sided	FALSE	TRUE	0.870398	0.0298598	BABAM2
FOSL2	1037	4313	5350	2.30411e+06	0.0332708	0	two.sided	FALSE	TRUE	0.0836983	0.219359	FOSL2
PPP1CB	1037	4313	5350	2407917	5.19338e-08	0	two.sided	FALSE	TRUE	5.45516e-07	0.540539	PPP1CB
TRMT61B	1037	4313	5350	2.28175e+06	0.0273548	0	two.sided	FALSE	TRUE	0.0714177	0.309839	TRMT61B
WDR43	1037	4313	5350	2.29438e+06	0.0437432	0	two.sided	FALSE	TRUE	0.103649	0.194324	WDR43
TOGARAM2	1037	4313	5350	2.22045e+06	0.205743	0	two.sided	FALSE	TRUE	0.340233	-0.429019	TOGARAM2
CLIP4	1037	4313	5350	2.22757e+06	0.717139	0	two.sided	FALSE	TRUE	0.812568	-0.0391059	CLIP4
YPEL5	1037	4313	5350	2922417	1.4457e-63	0	two.sided	FALSE	TRUE	3.65199e-61	0.867079	YPEL5
LBH	1037	4313	5350	1.98804e+06	2.04044e-10	0	two.sided	FALSE	TRUE	2.95978e-09	-0.463733	LBH
LCLAT1	1037	4313	5350	2.22311e+06	0.292363	0	two.sided	FALSE	TRUE	0.438524	-0.362205	LCLAT1
MEMO1	1037	4313	5350	2222729	0.4132	0	two.sided	FALSE	TRUE	0.558132	-0.214073	MEMO1
DPY30	1037	4313	5350	2.2151e+06	0.35358	0	two.sided	FALSE	TRUE	0.500619	-0.132021	DPY30
SPAST	1037	4313	5350	2.24073e+06	0.787688	0	two.sided	FALSE	TRUE	0.862661	0.115911	SPAST
AL121658.1	1037	4313	5350	2.22141e+06	0.0904925	0	two.sided	FALSE	TRUE	0.18181	-0.838514	AL121658.1
SLC30A6	1037	4313	5350	2220191	0.17485	0	two.sided	FALSE	TRUE	0.301068	-0.504176	SLC30A6
YIPF4	1037	4313	5350	2188875	0.0394641	0	two.sided	FALSE	TRUE	0.0956733	-0.347578	YIPF4
BIRC6	1037	4313	5350	2211492	0.479378	0	two.sided	FALSE	TRUE	0.616852	-0.0447091	BIRC6
TTC27	1037	4313	5350	2.20053e+06	0.0167871	0	two.sided	FALSE	TRUE	0.0478042	-0.734585	TTC27
FAM98A	1037	4313	5350	2.20811e+06	0.0754628	0	two.sided	FALSE	TRUE	0.157924	-0.446759	FAM98A
CRIM1	1037	4313	5350	2.2035e+06	0.0177741	0	two.sided	FALSE	TRUE	0.0500507	-0.704711	CRIM1
FEZ2	1037	4313	5350	2212819	0.222886	0	two.sided	FALSE	TRUE	0.361143	-0.218408	FEZ2
STRN	1037	4313	5350	2.16754e+06	0.00810415	0	two.sided	FALSE	TRUE	0.0261805	-0.420319	STRN
HEATR5B	1037	4313	5350	2211552	0.14336	0	two.sided	FALSE	TRUE	0.258387	-0.377644	HEATR5B
GPATCH11	1037	4313	5350	2212245	0.150523	0	two.sided	FALSE	TRUE	0.268094	-0.350447	GPATCH11
EIF2AK2	1037	4313	5350	2323852	0.00284036	0	two.sided	FALSE	TRUE	0.0106806	0.334107	EIF2AK2
CEBPZOS	1037	4313	5350	2.13822e+06	0.000268081	0	two.sided	FALSE	TRUE	0.00135771	-0.498391	CEBPZOS
CEBPZ	1037	4313	5350	2.4971e+06	5.5585e-14	0	two.sided	FALSE	TRUE	1.13549e-12	0.611505	CEBPZ
NDUFAF7	1037	4313	5350	2.2392e+06	0.858897	0	two.sided	FALSE	TRUE	0.910594	0.0134217	NDUFAF7
PRKD3	1037	4313	5350	2265090	0.166402	0	two.sided	FALSE	TRUE	0.29009	0.252215	PRKD3
AC006369.1	1037	4313	5350	2173033	0.00155633	0	two.sided	FALSE	TRUE	0.00634854	-0.659239	AC006369.1
CDC42EP3	1037	4313	5350	2.36322e+06	1.79035e-05	0	two.sided	FALSE	TRUE	0.000122718	0.496045	CDC42EP3
RMDN2	1037	4313	5350	2227060	0.232572	0	two.sided	FALSE	TRUE	0.373276	-0.478398	RMDN2
ATL2	1037	4313	5350	2310773	4.6621e-06	0	two.sided	FALSE	TRUE	3.56087e-05	0.853907	ATL2
HNRNPLL	1037	4313	5350	2.43242e+06	3.31154e-11	0	two.sided	FALSE	TRUE	5.19321e-10	0.701015	HNRNPLL
GALM	1037	4313	5350	2244329	0.701469	0	two.sided	FALSE	TRUE	0.79978	0.0323815	GALM
SRSF7	1037	4313	5350	2849797	1.69691e-44	0	two.sided	FALSE	TRUE	2.04359e-42	0.475345	SRSF7
GEMIN6	1037	4313	5350	2233017	0.740774	0	two.sided	FALSE	TRUE	0.830799	-0.0314657	GEMIN6
DHX57	1037	4313	5350	2241648	0.722593	0	two.sided	FALSE	TRUE	0.816217	0.149663	DHX57
MORN2	1037	4313	5350	2.21923e+06	0.0505972	0	two.sided	FALSE	TRUE	0.115911	-1.12361	MORN2
SOS1	1037	4313	5350	2219518	0.317692	0	two.sided	FALSE	TRUE	0.463232	-0.191773	SOS1
MAP4K3	1037	4313	5350	2.26277e+06	0.0349983	0	two.sided	FALSE	TRUE	0.0870712	0.566395	MAP4K3
AC007388.1	1037	4313	5350	2.22078e+06	0.0692974	0	two.sided	FALSE	TRUE	0.148013	-1.05917	AC007388.1
THUMPD2	1037	4313	5350	2.25511e+06	0.260377	0	two.sided	FALSE	TRUE	0.402737	0.248508	THUMPD2
EML4	1037	4313	5350	2.83459e+06	1.97745e-45	0	two.sided	FALSE	TRUE	2.52846e-43	0.642527	EML4
COX7A2L	1037	4313	5350	2160008	0.0347535	0	two.sided	FALSE	TRUE	0.0866496	-0.182808	COX7A2L
MTA3	1037	4313	5350	2.22637e+06	0.475737	0	two.sided	FALSE	TRUE	0.614519	-0.210457	MTA3
ZFP36L2	1037	4313	5350	2368901	0.00284582	0	two.sided	FALSE	TRUE	0.0106946	0.0987488	ZFP36L2
THADA	1037	4313	5350	2201167	0.0724885	0	two.sided	FALSE	TRUE	0.152963	-0.356617	THADA
DYNC2LI1	1037	4313	5350	2229328	0.411325	0	two.sided	FALSE	TRUE	0.556681	-0.438497	DYNC2LI1
LRPPRC	1037	4313	5350	2209502	0.341546	0	two.sided	FALSE	TRUE	0.487848	-0.125035	LRPPRC
PPM1B	1037	4313	5350	2.33563e+06	0.00151052	0	two.sided	FALSE	TRUE	0.00618113	0.320271	PPM1B
PREPL	1037	4313	5350	2214270	0.116337	0	two.sided	FALSE	TRUE	0.219953	-0.422602	PREPL
CAMKMT	1037	4313	5350	2.26918e+06	0.0591263	0	two.sided	FALSE	TRUE	0.130793	0.346184	CAMKMT
SRBD1	1037	4313	5350	2.18304e+06	0.000404605	0	two.sided	FALSE	TRUE	0.00195635	-1.11032	SRBD1
PRKCE	1037	4313	5350	2.23653e+06	0.988376	0	two.sided	FALSE	TRUE	0.992689	-0.0172594	PRKCE
ATP6V1E2	1037	4313	5350	2.2156e+06	0.0560668	0	two.sided	FALSE	TRUE	0.125662	-0.772011	ATP6V1E2
RHOQ	1037	4313	5350	2.24074e+06	0.792747	0	two.sided	FALSE	TRUE	0.866267	0.0488645	RHOQ
PIGF	1037	4313	5350	2.20414e+06	0.0523851	0	two.sided	FALSE	TRUE	0.119059	-0.483495	PIGF
CRIPT	1037	4313	5350	2.22166e+06	0.436903	0	two.sided	FALSE	TRUE	0.580061	-0.126045	CRIPT
SOCS5	1037	4313	5350	2273745	0.00740426	0	two.sided	FALSE	TRUE	0.0242367	0.691172	SOCS5
MCFD2	1037	4313	5350	2232831	0.863921	0	two.sided	FALSE	TRUE	0.914423	-0.0474182	MCFD2
TTC7A	1037	4313	5350	2.30457e+06	0.000537515	0	two.sided	FALSE	TRUE	0.00250881	0.560444	TTC7A
CALM2	1037	4313	5350	2111909	0.00350375	0	two.sided	FALSE	TRUE	0.0127507	-0.137228	CALM2
MSH2	1037	4313	5350	2186595	0.000281487	0	two.sided	FALSE	TRUE	0.00141591	-1.41824	MSH2
KCNK12	1037	4313	5350	2222769	0.226116	0	two.sided	FALSE	TRUE	0.365405	-0.296311	KCNK12
MSH6	1037	4313	5350	2235776	0.971503	0	two.sided	FALSE	TRUE	0.982966	0.00751668	MSH6
FBXO11	1037	4313	5350	2.2576e+06	0.302049	0	two.sided	FALSE	TRUE	0.448312	0.193652	FBXO11
FOXN2	1037	4313	5350	2.25494e+06	0.522233	0	two.sided	FALSE	TRUE	0.653829	0.0551046	FOXN2
AC093635.1	1037	4313	5350	2229165	0.361147	0	two.sided	FALSE	TRUE	0.508	-0.525571	AC093635.1
PPP1R21	1037	4313	5350	2.2133e+06	0.212126	0	two.sided	FALSE	TRUE	0.34866	-0.246326	PPP1R21
ASB3	1037	4313	5350	2.25273e+06	0.342474	0	two.sided	FALSE	TRUE	0.488771	0.191805	ASB3
ERLEC1	1037	4313	5350	2218236	0.535221	0	two.sided	FALSE	TRUE	0.663852	-0.0901376	ERLEC1
PSME4	1037	4313	5350	2415908	9.17982e-08	0	two.sided	FALSE	TRUE	9.27852e-07	0.46924	PSME4
ACYP2	1037	4313	5350	2254281	0.448679	0	two.sided	FALSE	TRUE	0.591194	0.100936	ACYP2
SPTBN1	1037	4313	5350	2347643	0.000233027	0	two.sided	FALSE	TRUE	0.00120192	0.40728	SPTBN1
RTN4	1037	4313	5350	2207702	0.412151	0	two.sided	FALSE	TRUE	0.557183	-0.0759191	RTN4
RPS27A	1037	4313	5350	2.50033e+06	3.28012e-09	0	two.sided	FALSE	TRUE	4.0443e-08	0.0349375	RPS27A
MTIF2	1037	4313	5350	2221770	0.308014	0	two.sided	FALSE	TRUE	0.453979	-0.275434	MTIF2
CCDC88A	1037	4313	5350	2.24005e+06	0.79213	0	two.sided	FALSE	TRUE	0.865776	0.0966419	CCDC88A
CFAP36	1037	4313	5350	2.26003e+06	0.212198	0	two.sided	FALSE	TRUE	0.34866	0.214254	CFAP36
PPP4R3B	1037	4313	5350	2.1908e+06	0.150007	0	two.sided	FALSE	TRUE	0.267358	-0.132814	PPP4R3B
AC015982.1	1037	4313	5350	2217708	0.13102	0	two.sided	FALSE	TRUE	0.241028	-0.525489	AC015982.1
PNPT1	1037	4313	5350	2201371	0.0458428	0	two.sided	FALSE	TRUE	0.107395	-0.47375	PNPT1
VRK2	1037	4313	5350	2.19886e+06	0.0856708	0	two.sided	FALSE	TRUE	0.174047	-0.308343	VRK2
FANCL	1037	4313	5350	2226212	0.254888	0	two.sided	FALSE	TRUE	0.397396	-0.586262	FANCL
PAPOLG	1037	4313	5350	2231928	0.804265	0	two.sided	FALSE	TRUE	0.872318	-0.007849	PAPOLG
REL	1037	4313	5350	2.80138e+06	3.04914e-42	0	two.sided	FALSE	TRUE	3.32421e-40	0.662471	REL
PUS10	1037	4313	5350	2.22948e+06	0.527515	0	two.sided	FALSE	TRUE	0.657836	-0.231455	PUS10
PEX13	1037	4313	5350	2.22361e+06	0.433751	0	two.sided	FALSE	TRUE	0.577572	-0.216709	PEX13
C2orf74	1037	4313	5350	2.17077e+06	4.28491e-05	0	two.sided	FALSE	TRUE	0.000268799	-1.22453	C2orf74
USP34	1037	4313	5350	2.29824e+06	0.0616942	0	two.sided	FALSE	TRUE	0.135202	0.166234	USP34
AC016727.1	1037	4313	5350	2.23314e+06	0.762556	0	two.sided	FALSE	TRUE	0.844142	-0.077286	AC016727.1
XPO1	1037	4313	5350	2.17327e+06	0.0204608	0	two.sided	FALSE	TRUE	0.0562699	-0.314738	XPO1
CCT4	1037	4313	5350	2.35212e+06	0.00204624	0	two.sided	FALSE	TRUE	0.00808273	0.226883	CCT4
COMMD1	1037	4313	5350	2163436	0.00954452	0	two.sided	FALSE	TRUE	0.0301288	-0.303916	COMMD1
B3GNT2	1037	4313	5350	2389894	2.86191e-07	0	two.sided	FALSE	TRUE	2.69461e-06	0.507493	B3GNT2
EHBP1	1037	4313	5350	2211848	0.140992	0	two.sided	FALSE	TRUE	0.255512	-0.311697	EHBP1
WDPCP	1037	4313	5350	2.22842e+06	0.522268	0	two.sided	FALSE	TRUE	0.653829	-0.204583	WDPCP
MDH1	1037	4313	5350	2.13537e+06	0.0013976	0	two.sided	FALSE	TRUE	0.0057715	-0.363693	MDH1
UGP2	1037	4313	5350	2159938	0.00699113	0	two.sided	FALSE	TRUE	0.0231111	-0.327817	UGP2
VPS54	1037	4313	5350	2237221	0.925918	0	two.sided	FALSE	TRUE	0.954583	-0.00906532	VPS54
PELI1	1037	4313	5350	2366616	1.83058e-05	0	two.sided	FALSE	TRUE	0.00012531	0.417355	PELI1
AFTPH	1037	4313	5350	2.27789e+06	0.103173	0	two.sided	FALSE	TRUE	0.200895	0.212835	AFTPH
SERTAD2	1037	4313	5350	2341001	0.000102899	0	two.sided	FALSE	TRUE	0.000584277	0.453137	SERTAD2
SLC1A4	1037	4313	5350	2.18e+06	0.000764977	0	two.sided	FALSE	TRUE	0.00339309	-0.939152	SLC1A4
CEP68	1037	4313	5350	2.21807e+06	0.246639	0	two.sided	FALSE	TRUE	0.389099	-0.312806	CEP68
RAB1A	1037	4313	5350	2.44473e+06	9.54193e-12	0	two.sided	FALSE	TRUE	1.58375e-10	0.632799	RAB1A
ACTR2	1037	4313	5350	1.9812e+06	3.36413e-10	0	two.sided	FALSE	TRUE	4.74351e-09	-0.398525	ACTR2
ETAA1	1037	4313	5350	2212018	0.0867338	0	two.sided	FALSE	TRUE	0.175724	-0.530562	ETAA1
C1D	1037	4313	5350	2.24283e+06	0.842929	0	two.sided	FALSE	TRUE	0.902068	0.0436738	C1D
PNO1	1037	4313	5350	2.29056e+06	0.00956968	0	two.sided	FALSE	TRUE	0.0301787	0.382612	PNO1
PPP3R1	1037	4313	5350	2312730	0.00758832	0	two.sided	FALSE	TRUE	0.0247379	0.305421	PPP3R1
AC017083.2	1037	4313	5350	2.20934e+06	0.01817	0	two.sided	FALSE	TRUE	0.050999	-0.986693	AC017083.2
AC017083.1	1037	4313	5350	2.24367e+06	0.357101	0	two.sided	FALSE	TRUE	0.504501	0.399275	AC017083.1
PLEK	1037	4313	5350	1.67058e+06	8.82261e-45	0	two.sided	FALSE	TRUE	1.07501e-42	-1.06792	PLEK
ARHGAP25	1037	4313	5350	2.12435e+06	0.00112979	0	two.sided	FALSE	TRUE	0.00476433	-0.313084	ARHGAP25
GFPT1	1037	4313	5350	2290411	0.0261627	0	two.sided	FALSE	TRUE	0.0688084	0.336167	GFPT1
NFU1	1037	4313	5350	2198453	0.101947	0	two.sided	FALSE	TRUE	0.199139	-0.286015	NFU1
AAK1	1037	4313	5350	2.25811e+06	0.568713	0	two.sided	FALSE	TRUE	0.69296	0.0306386	AAK1
ANXA4	1037	4313	5350	2182754	0.00301121	0	two.sided	FALSE	TRUE	0.0111822	-0.742581	ANXA4
GMCL1	1037	4313	5350	2.2428e+06	0.768877	0	two.sided	FALSE	TRUE	0.849234	0.0126307	GMCL1
SNRNP27	1037	4313	5350	2300728	0.012073	0	two.sided	FALSE	TRUE	0.0365082	0.327644	SNRNP27
MXD1	1037	4313	5350	2.32795e+06	9.71982e-07	0	two.sided	FALSE	TRUE	8.37505e-06	0.821012	MXD1
PCBP1	1037	4313	5350	2204274	0.462474	0	two.sided	FALSE	TRUE	0.603179	-0.0287757	PCBP1
C2orf42	1037	4313	5350	2.22264e+06	0.153368	0	two.sided	FALSE	TRUE	0.272039	-0.726277	C2orf42
TIA1	1037	4313	5350	2.22307e+06	0.589162	0	two.sided	FALSE	TRUE	0.71052	-0.0782418	TIA1
PCYOX1	1037	4313	5350	2178797	2.64907e-05	0	two.sided	FALSE	TRUE	0.000174199	-1.59098	PCYOX1
SNRPG	1037	4313	5350	2.42921e+06	4.16497e-07	0	two.sided	FALSE	TRUE	3.80394e-06	0.351899	SNRPG
FAM136A	1037	4313	5350	2203579	0.202305	0	two.sided	FALSE	TRUE	0.33605	-0.174036	FAM136A
TEX261	1037	4313	5350	2.21835e+06	0.0575694	0	two.sided	FALSE	TRUE	0.12806	-0.966801	TEX261
NAGK	1037	4313	5350	2223704	0.509988	0	two.sided	FALSE	TRUE	0.643669	-0.140189	NAGK
MCEE	1037	4313	5350	2.23287e+06	0.764957	0	two.sided	FALSE	TRUE	0.845896	-0.140519	MCEE
MPHOSPH10	1037	4313	5350	2238197	0.945505	0	two.sided	FALSE	TRUE	0.967247	-0.0147924	MPHOSPH10
PAIP2B	1037	4313	5350	2.24938e+06	0.0697662	0	two.sided	FALSE	TRUE	0.14883	0.841181	PAIP2B
ZNF638	1037	4313	5350	2167044	0.0178385	0	two.sided	FALSE	TRUE	0.0502183	-0.300895	ZNF638
DYSF	1037	4313	5350	2237614	0.857511	0	two.sided	FALSE	TRUE	0.909777	0.00861341	DYSF
EXOC6B	1037	4313	5350	2261865	0.0536838	0	two.sided	FALSE	TRUE	0.121319	0.458714	EXOC6B
SFXN5	1037	4313	5350	2.22873e+06	0.357434	0	two.sided	FALSE	TRUE	0.504765	-0.483564	SFXN5
RAB11FIP5	1037	4313	5350	2.21279e+06	0.0780553	0	two.sided	FALSE	TRUE	0.162105	-0.550201	RAB11FIP5
SMYD5	1037	4313	5350	2.22854e+06	0.486128	0	two.sided	FALSE	TRUE	0.622814	-0.23169	SMYD5
PRADC1	1037	4313	5350	2175779	9.72795e-05	0	two.sided	FALSE	TRUE	0.000556951	-1.22729	PRADC1
CCT7	1037	4313	5350	2.09266e+06	3.41456e-05	0	two.sided	FALSE	TRUE	0.000219112	-0.366927	CCT7
FBXO41	1037	4313	5350	2.24388e+06	0.477062	0	two.sided	FALSE	TRUE	0.615616	0.253412	FBXO41
ALMS1	1037	4313	5350	2.21924e+06	0.305358	0	two.sided	FALSE	TRUE	0.450962	-0.217137	ALMS1
TPRKB	1037	4313	5350	2228929	0.745797	0	two.sided	FALSE	TRUE	0.833875	-0.0570595	TPRKB
DUSP11	1037	4313	5350	2378906	3.2134e-07	0	two.sided	FALSE	TRUE	3.001e-06	0.545923	DUSP11
STAMBP	1037	4313	5350	2188451	0.0118195	0	two.sided	FALSE	TRUE	0.0358567	-0.550257	STAMBP
DGUOK	1037	4313	5350	2.06602e+06	1.40163e-07	0	two.sided	FALSE	TRUE	1.38123e-06	-0.59047	DGUOK
AC073046.1	1037	4313	5350	2.25973e+06	0.00343631	0	two.sided	FALSE	TRUE	0.0125493	1.1372	AC073046.1
TET3	1037	4313	5350	2.22538e+06	0.253952	0	two.sided	FALSE	TRUE	0.396649	-0.447117	TET3
BOLA3	1037	4313	5350	2.16956e+06	0.00841062	0	two.sided	FALSE	TRUE	0.027044	-0.42124	BOLA3
MOB1A	1037	4313	5350	2.34616e+06	0.00486008	0	two.sided	FALSE	TRUE	0.0168686	0.164622	MOB1A
MTHFD2	1037	4313	5350	2296166	0.0010449	0	two.sided	FALSE	TRUE	0.00444987	0.542908	MTHFD2
DCTN1	1037	4313	5350	2.15859e+06	0.00677695	0	two.sided	FALSE	TRUE	0.0224604	-0.354415	DCTN1
WDR54	1037	4313	5350	2.15827e+06	0.00180315	0	two.sided	FALSE	TRUE	0.00722726	-0.512494	WDR54
INO80B	1037	4313	5350	2230210	0.42739	0	two.sided	FALSE	TRUE	0.57197	-0.428659	INO80B
WBP1	1037	4313	5350	2.17836e+06	0.0381969	0	two.sided	FALSE	TRUE	0.0933031	-0.257205	WBP1
MOGS	1037	4313	5350	2.09354e+06	3.29896e-07	0	two.sided	FALSE	TRUE	3.07239e-06	-0.681508	MOGS
MRPL53	1037	4313	5350	2237676	0.886136	0	two.sided	FALSE	TRUE	0.928824	0.0313864	MRPL53
TTC31	1037	4313	5350	2168060	0.000149236	0	two.sided	FALSE	TRUE	0.00081392	-0.95012	TTC31
PCGF1	1037	4313	5350	2225707	0.566824	0	two.sided	FALSE	TRUE	0.691147	-0.105211	PCGF1
AUP1	1037	4313	5350	2.23803e+06	0.964121	0	two.sided	FALSE	TRUE	0.978194	0.00826148	AUP1
HTRA2	1037	4313	5350	2173790	0.00293531	0	two.sided	FALSE	TRUE	0.0109632	-0.60908	HTRA2
DOK1	1037	4313	5350	2.21053e+06	0.0748595	0	two.sided	FALSE	TRUE	0.156979	-0.534223	DOK1
SEMA4F	1037	4313	5350	2.24937e+06	0.158453	0	two.sided	FALSE	TRUE	0.279382	0.542541	SEMA4F
POLE4	1037	4313	5350	2.22993e+06	0.838047	0	two.sided	FALSE	TRUE	0.898701	-0.00534356	POLE4
MRPL19	1037	4313	5350	2204106	0.101508	0	two.sided	FALSE	TRUE	0.198475	-0.348575	MRPL19
GCFC2	1037	4313	5350	2.282e+06	0.010705	0	two.sided	FALSE	TRUE	0.0330663	0.468789	GCFC2
SUCLG1	1037	4313	5350	2200386	0.183838	0	two.sided	FALSE	TRUE	0.31257	-0.141838	SUCLG1
TRABD2A	1037	4313	5350	2.31718e+06	1.01467e-07	0	two.sided	FALSE	TRUE	1.01738e-06	1.01143	TRABD2A
TMSB10	1037	4313	5350	1538558	3.93654e-55	0	two.sided	FALSE	TRUE	7.02944e-53	-0.139933	TMSB10
KCMF1	1037	4313	5350	2.38101e+06	2.14205e-06	0	two.sided	FALSE	TRUE	1.73186e-05	0.456167	KCMF1
TGOLN2	1037	4313	5350	2238211	0.960839	0	two.sided	FALSE	TRUE	0.975724	0.00337873	TGOLN2
RETSAT	1037	4313	5350	2.21463e+06	0.0846373	0	two.sided	FALSE	TRUE	0.172591	-0.569331	RETSAT
ELMOD3	1037	4313	5350	2224152	0.478084	0	two.sided	FALSE	TRUE	0.616147	-0.173602	ELMOD3
CAPG	1037	4313	5350	2.25182e+06	0.192346	0	two.sided	FALSE	TRUE	0.323031	0.369781	CAPG
MAT2A	1037	4313	5350	2134065	1.12386e-05	0	two.sided	FALSE	TRUE	8.03856e-05	-0.770409	MAT2A
GGCX	1037	4313	5350	2.24819e+06	0.457331	0	two.sided	FALSE	TRUE	0.598884	0.149521	GGCX
VAMP8	1037	4313	5350	2.0099e+06	6.60781e-09	0	two.sided	FALSE	TRUE	7.88446e-08	-0.404081	VAMP8
VAMP5	1037	4313	5350	2.062e+06	9.66798e-07	0	two.sided	FALSE	TRUE	8.34427e-06	-0.444498	VAMP5
RNF181	1037	4313	5350	2225048	0.743677	0	two.sided	FALSE	TRUE	0.832317	-0.0277305	RNF181
TMEM150A	1037	4313	5350	2.22432e+06	0.287864	0	two.sided	FALSE	TRUE	0.432967	-0.36538	TMEM150A
USP39	1037	4313	5350	2.28457e+06	0.040253	0	two.sided	FALSE	TRUE	0.0971343	0.282157	USP39
C2orf68	1037	4313	5350	2204652	0.0535421	0	two.sided	FALSE	TRUE	0.121051	-0.47088	C2orf68
GNLY	1037	4313	5350	1.83939e+06	3.18549e-24	0	two.sided	FALSE	TRUE	1.37467e-22	-0.875514	GNLY
ST3GAL5	1037	4313	5350	2.24331e+06	0.725574	0	two.sided	FALSE	TRUE	0.818335	0.123666	ST3GAL5
POLR1A	1037	4313	5350	2.20916e+06	0.0625528	0	two.sided	FALSE	TRUE	0.136621	-0.49653	POLR1A
PTCD3	1037	4313	5350	2.23586e+06	0.984324	0	two.sided	FALSE	TRUE	0.990444	-0.0194014	PTCD3
IMMT	1037	4313	5350	2192783	0.0782722	0	two.sided	FALSE	TRUE	0.162393	-0.246144	IMMT
MRPL35	1037	4313	5350	2247977	0.301629	0	two.sided	FALSE	TRUE	0.447817	0.399833	MRPL35
KDM3A	1037	4313	5350	2236129	0.994938	0	two.sided	FALSE	TRUE	0.996965	-0.00381651	KDM3A
CHMP3	1037	4313	5350	2279288	0.0662406	0	two.sided	FALSE	TRUE	0.143017	0.235948	CHMP3
RNF103	1037	4313	5350	2.32214e+06	1.4178e-05	0	two.sided	FALSE	TRUE	9.92842e-05	0.684392	RNF103
RMND5A	1037	4313	5350	2.32651e+06	0.00203442	0	two.sided	FALSE	TRUE	0.00804832	0.339986	RMND5A
CD8A	1037	4313	5350	1.82696e+06	2.19914e-20	0	two.sided	FALSE	TRUE	7.41904e-19	-0.259835	CD8A
CD8B	1037	4313	5350	1.66325e+06	6.61348e-39	0	two.sided	FALSE	TRUE	6.1157e-37	-0.514316	CD8B
LINC01943	1037	4313	5350	2291843	9.61517e-05	0	two.sided	FALSE	TRUE	0.000552326	0.987359	LINC01943
CYTOR	1037	4313	5350	2.31591e+06	0.0324083	0	two.sided	FALSE	TRUE	0.0819065	0.204475	CYTOR
KRCC1	1037	4313	5350	2175289	0.00132691	0	two.sided	FALSE	TRUE	0.00549934	-0.703672	KRCC1
EIF2AK3	1037	4313	5350	2.35935e+06	3.81446e-10	0	two.sided	FALSE	TRUE	5.31714e-09	0.946145	EIF2AK3
RPIA	1037	4313	5350	2.16872e+06	0.0222521	0	two.sided	FALSE	TRUE	0.0603786	-0.294913	RPIA
IGKV3-20	1037	4313	5350	2.22959e+06	0.363326	0	two.sided	FALSE	TRUE	0.510163	-0.628232	IGKV3-20
MAL	1037	4313	5350	2311584	3.41416e-11	0	two.sided	FALSE	TRUE	5.34145e-10	1.66235	MAL
MRPS5	1037	4313	5350	2210004	0.357569	0	two.sided	FALSE	TRUE	0.504887	-0.160407	MRPS5
ZNF514	1037	4313	5350	2229626	0.365801	0	two.sided	FALSE	TRUE	0.512319	-0.439395	ZNF514
FAHD2A	1037	4313	5350	2.19759e+06	0.0273769	0	two.sided	FALSE	TRUE	0.0714574	-0.541204	FAHD2A
LINC00342	1037	4313	5350	2233603	0.813782	0	two.sided	FALSE	TRUE	0.88052	0.0836128	LINC00342
ANKRD36C	1037	4313	5350	2261411	0.403783	0	two.sided	FALSE	TRUE	0.549898	0.0881564	ANKRD36C
DUSP2	1037	4313	5350	2.50298e+06	1.91262e-09	0	two.sided	FALSE	TRUE	2.44858e-08	0.179735	DUSP2
STARD7	1037	4313	5350	2323244	0.0118586	0	two.sided	FALSE	TRUE	0.0359647	0.23999	STARD7
TMEM127	1037	4313	5350	2203985	0.153699	0	two.sided	FALSE	TRUE	0.272485	-0.232119	TMEM127
CIAO1	1037	4313	5350	2147940	0.00285513	0	two.sided	FALSE	TRUE	0.0107218	-0.353016	CIAO1
SNRNP200	1037	4313	5350	2.32993e+06	0.0116931	0	two.sided	FALSE	TRUE	0.0355461	0.179576	SNRNP200
AC021188.1	1037	4313	5350	2250775	0.218695	0	two.sided	FALSE	TRUE	0.35608	0.402677	AC021188.1
ITPRIPL1	1037	4313	5350	2.22224e+06	0.309868	0	two.sided	FALSE	TRUE	0.455673	-0.237601	ITPRIPL1
NCAPH	1037	4313	5350	2235555	0.923564	0	two.sided	FALSE	TRUE	0.953063	-0.0665815	NCAPH
ARID5A	1037	4313	5350	2560039	2.16899e-21	0	two.sided	FALSE	TRUE	7.90994e-20	0.752539	ARID5A
KANSL3	1037	4313	5350	2259427	0.271362	0	two.sided	FALSE	TRUE	0.415954	0.171825	KANSL3
LMAN2L	1037	4313	5350	2237033	0.916346	0	two.sided	FALSE	TRUE	0.948809	0.0553378	LMAN2L
CNNM4	1037	4313	5350	2227897	0.442466	0	two.sided	FALSE	TRUE	0.585211	-0.306855	CNNM4
CNNM3	1037	4313	5350	2.2531e+06	0.339546	0	two.sided	FALSE	TRUE	0.485755	0.210325	CNNM3
ANKRD39	1037	4313	5350	2206167	0.199233	0	two.sided	FALSE	TRUE	0.331852	-0.195069	ANKRD39
SEMA4C	1037	4313	5350	2236469	0.986945	0	two.sided	FALSE	TRUE	0.991926	0.00695029	SEMA4C
FAHD2B	1037	4313	5350	2212797	0.105094	0	two.sided	FALSE	TRUE	0.203945	-0.448759	FAHD2B
ANKRD36	1037	4313	5350	2.32964e+06	0.000389959	0	two.sided	FALSE	TRUE	0.00189648	0.421855	ANKRD36
AC092683.1	1037	4313	5350	2.24807e+06	0.41515	0	two.sided	FALSE	TRUE	0.559712	0.218064	AC092683.1
ANKRD36B	1037	4313	5350	2.27261e+06	0.169238	0	two.sided	FALSE	TRUE	0.293654	0.171993	ANKRD36B
COX5B	1037	4313	5350	2.23193e+06	0.918317	0	two.sided	FALSE	TRUE	0.949765	-0.0112274	COX5B
ACTR1B	1037	4313	5350	2.19478e+06	0.123143	0	two.sided	FALSE	TRUE	0.230174	-0.220817	ACTR1B
ZAP70	1037	4313	5350	1922746	1.51222e-13	0	two.sided	FALSE	TRUE	2.91117e-12	-0.361211	ZAP70
TMEM131	1037	4313	5350	2219849	0.502733	0	two.sided	FALSE	TRUE	0.637542	-0.0817379	TMEM131
INPP4A	1037	4313	5350	2.09708e+06	2.25571e-06	0	two.sided	FALSE	TRUE	1.81789e-05	-0.587066	INPP4A
COA5	1037	4313	5350	2.21624e+06	0.363652	0	two.sided	FALSE	TRUE	0.510552	-0.106989	COA5
UNC50	1037	4313	5350	2169638	0.00117161	0	two.sided	FALSE	TRUE	0.00492112	-0.622057	UNC50
MGAT4A	1037	4313	5350	2.38698e+06	0.000122535	0	two.sided	FALSE	TRUE	0.000680844	0.245773	MGAT4A
AC109826.1	1037	4313	5350	2.23339e+06	0.794921	0	two.sided	FALSE	TRUE	0.867727	-0.0653642	AC109826.1
TSGA10	1037	4313	5350	2.2651e+06	0.00458898	0	two.sided	FALSE	TRUE	0.0160513	0.860074	TSGA10
LIPT1	1037	4313	5350	2.209e+06	0.0419091	0	two.sided	FALSE	TRUE	0.100174	-0.685255	LIPT1
MITD1	1037	4313	5350	2190861	0.031159	0	two.sided	FALSE	TRUE	0.0793687	-0.424813	MITD1
MRPL30	1037	4313	5350	2.23874e+06	0.746662	0	two.sided	FALSE	TRUE	0.834216	0.115922	MRPL30
TXNDC9	1037	4313	5350	2.19086e+06	0.0208172	0	two.sided	FALSE	TRUE	0.0569693	-0.484274	TXNDC9
EIF5B	1037	4313	5350	2.22623e+06	0.767662	0	two.sided	FALSE	TRUE	0.848095	-0.0410246	EIF5B
REV1	1037	4313	5350	2280573	0.048078	0	two.sided	FALSE	TRUE	0.111372	0.316956	REV1
CHST10	1037	4313	5350	2216180	0.0681598	0	two.sided	FALSE	TRUE	0.146155	-0.738791	CHST10
PDCL3	1037	4313	5350	2.24116e+06	0.855619	0	two.sided	FALSE	TRUE	0.908994	0.0127864	PDCL3
RPL31	1037	4313	5350	2532043	2.39885e-11	0	two.sided	FALSE	TRUE	3.81642e-10	0.113127	RPL31
CNOT11	1037	4313	5350	2281085	0.0745281	0	two.sided	FALSE	TRUE	0.156411	0.217876	CNOT11
RNF149	1037	4313	5350	2411725	2.70853e-06	0	two.sided	FALSE	TRUE	2.15144e-05	0.346762	RNF149
MAP4K4	1037	4313	5350	2.19399e+06	0.163144	0	two.sided	FALSE	TRUE	0.285709	-0.18709	MAP4K4
IL18R1	1037	4313	5350	2256312	0.18757	0	two.sided	FALSE	TRUE	0.317066	0.373934	IL18R1
IL18RAP	1037	4313	5350	2271406	0.000219666	0	two.sided	FALSE	TRUE	0.00114268	1.21957	IL18RAP
MFSD9	1037	4313	5350	2.23509e+06	0.917001	0	two.sided	FALSE	TRUE	0.948939	-0.0240928	MFSD9
TMEM182	1037	4313	5350	2.24167e+06	0.531868	0	two.sided	FALSE	TRUE	0.661541	0.243935	TMEM182
MRPS9	1037	4313	5350	2.18178e+06	0.00189016	0	two.sided	FALSE	TRUE	0.00753226	-0.758602	MRPS9
TGFBRAP1	1037	4313	5350	2.16453e+06	0.000804287	0	two.sided	FALSE	TRUE	0.00354317	-0.655068	TGFBRAP1
AC012360.3	1037	4313	5350	2213173	0.0208196	0	two.sided	FALSE	TRUE	0.0569693	-1.14589	AC012360.3
C2orf49	1037	4313	5350	2.28626e+06	0.0118177	0	two.sided	FALSE	TRUE	0.0358567	0.445031	C2orf49
NCK2	1037	4313	5350	2186503	0.133683	0	two.sided	FALSE	TRUE	0.244967	-0.112191	NCK2
UXS1	1037	4313	5350	2.23367e+06	0.883169	0	two.sided	FALSE	TRUE	0.926652	0.0169495	UXS1
CD8B2	1037	4313	5350	2.22662e+06	0.460133	0	two.sided	FALSE	TRUE	0.601338	-0.209478	CD8B2
GCC2	1037	4313	5350	2.37338e+06	0.000445566	0	two.sided	FALSE	TRUE	0.00213348	0.23836	GCC2
LIMS1	1037	4313	5350	2246004	0.682559	0	two.sided	FALSE	TRUE	0.784494	0.037913	LIMS1
RANBP2	1037	4313	5350	2589022	6.972e-27	0	two.sided	FALSE	TRUE	3.55709e-25	0.905198	RANBP2
CCDC138	1037	4313	5350	2228719	0.356577	0	two.sided	FALSE	TRUE	0.504105	-0.530379	CCDC138
SMIM37	1037	4313	5350	2102203	1.40645e-08	0	two.sided	FALSE	TRUE	1.59897e-07	-1.08316	SMIM37
MIR4435-2HG	1037	4313	5350	2112954	7.78008e-06	0	two.sided	FALSE	TRUE	5.77622e-05	-0.64188	MIR4435-2HG
BCL2L11	1037	4313	5350	2225566	0.596138	0	two.sided	FALSE	TRUE	0.715518	-0.166754	BCL2L11
ANAPC1	1037	4313	5350	2.23228e+06	0.857787	0	two.sided	FALSE	TRUE	0.90982	-0.00311252	ANAPC1
TMEM87B	1037	4313	5350	2.21971e+06	0.430009	0	two.sided	FALSE	TRUE	0.574398	-0.146138	TMEM87B
ZC3H8	1037	4313	5350	2.26243e+06	0.186843	0	two.sided	FALSE	TRUE	0.316153	0.195614	ZC3H8
ZC3H6	1037	4313	5350	2.27701e+06	0.0382974	0	two.sided	FALSE	TRUE	0.0935045	0.373859	ZC3H6
TTL	1037	4313	5350	2.23019e+06	0.667527	0	two.sided	FALSE	TRUE	0.77264	-0.142582	TTL
POLR1B	1037	4313	5350	2221818	0.281989	0	two.sided	FALSE	TRUE	0.427107	-0.376085	POLR1B
CHCHD5	1037	4313	5350	2198086	0.197713	0	two.sided	FALSE	TRUE	0.330329	-0.144953	CHCHD5
AC079922.2	1037	4313	5350	2.23629e+06	0.999703	0	two.sided	FALSE	TRUE	0.999722	-0.0419388	AC079922.2
SLC20A1	1037	4313	5350	2262043	0.366752	0	two.sided	FALSE	TRUE	0.513443	0.103574	SLC20A1
PSD4	1037	4313	5350	2101729	1.02841e-06	0	two.sided	FALSE	TRUE	8.83921e-06	-0.70341	PSD4
CBWD2	1037	4313	5350	2235118	0.948531	0	two.sided	FALSE	TRUE	0.968625	0.0434009	CBWD2
SLC35F5	1037	4313	5350	2234102	0.890443	0	two.sided	FALSE	TRUE	0.932206	-0.0697809	SLC35F5
ACTR3	1037	4313	5350	1.86834e+06	5.35864e-20	0	two.sided	FALSE	TRUE	1.76189e-18	-0.645258	ACTR3
DDX18	1037	4313	5350	2056290	1.01636e-07	0	two.sided	FALSE	TRUE	1.01803e-06	-0.551653	DDX18
CCDC93	1037	4313	5350	2404541	2.20248e-10	0	two.sided	FALSE	TRUE	3.18146e-09	0.714996	CCDC93
INSIG2	1037	4313	5350	2212195	0.114337	0	two.sided	FALSE	TRUE	0.217203	-0.382929	INSIG2
C2orf76	1037	4313	5350	2230241	0.625426	0	two.sided	FALSE	TRUE	0.739782	-0.0356566	C2orf76
DBI	1037	4313	5350	1858032	1.45795e-20	0	two.sided	FALSE	TRUE	4.96709e-19	-0.594593	DBI
TMEM177	1037	4313	5350	2224775	0.114396	0	two.sided	FALSE	TRUE	0.217235	-1.05895	TMEM177
PTPN4	1037	4313	5350	2042166	5.55879e-08	0	two.sided	FALSE	TRUE	5.81017e-07	-0.479614	PTPN4
EPB41L5	1037	4313	5350	2238399	0.800556	0	two.sided	FALSE	TRUE	0.870398	0.109128	EPB41L5
TMEM185B	1037	4313	5350	2233480	0.872339	0	two.sided	FALSE	TRUE	0.919948	-0.0438822	TMEM185B
RALB	1037	4313	5350	2205592	0.0405334	0	two.sided	FALSE	TRUE	0.0976515	-0.546145	RALB
CLASP1	1037	4313	5350	2.2577e+06	0.30513	0	two.sided	FALSE	TRUE	0.450818	0.171921	CLASP1
NIFK-AS1	1037	4313	5350	2216689	0.101097	0	two.sided	FALSE	TRUE	0.197932	-0.458906	NIFK-AS1
NIFK	1037	4313	5350	2.17222e+06	0.00905618	0	two.sided	FALSE	TRUE	0.0287655	-0.421151	NIFK
TSN	1037	4313	5350	2.2189e+06	0.542025	0	two.sided	FALSE	TRUE	0.670059	-0.0879184	TSN
GYPC	1037	4313	5350	2.29393e+06	0.175081	0	two.sided	FALSE	TRUE	0.301188	0.0692475	GYPC
BIN1	1037	4313	5350	2067254	8.28728e-06	0	two.sided	FALSE	TRUE	6.12206e-05	-0.347988	BIN1
ERCC3	1037	4313	5350	2251760	0.534713	0	two.sided	FALSE	TRUE	0.663617	0.0607066	ERCC3
MAP3K2	1037	4313	5350	2436357	7.97505e-09	0	two.sided	FALSE	TRUE	9.42895e-08	0.475082	MAP3K2
IWS1	1037	4313	5350	2.23443e+06	0.939173	0	two.sided	FALSE	TRUE	0.962785	-0.00125685	IWS1
WDR33	1037	4313	5350	2292672	0.0898877	0	two.sided	FALSE	TRUE	0.180961	0.153835	WDR33
SFT2D3	1037	4313	5350	2.22545e+06	0.403282	0	two.sided	FALSE	TRUE	0.549361	-0.266128	SFT2D3
POLR2D	1037	4313	5350	2231761	0.842424	0	two.sided	FALSE	TRUE	0.90167	-0.053564	POLR2D
AMMECR1L	1037	4313	5350	2240883	0.688489	0	two.sided	FALSE	TRUE	0.788879	0.0799358	AMMECR1L
AC012306.2	1037	4313	5350	2235935	0.969457	0	two.sided	FALSE	TRUE	0.981998	-0.0788184	AC012306.2
SAP130	1037	4313	5350	2274308	0.0465896	0	two.sided	FALSE	TRUE	0.108702	0.316649	SAP130
UGGT1	1037	4313	5350	2197584	0.0554549	0	two.sided	FALSE	TRUE	0.124533	-0.392076	UGGT1
HS6ST1	1037	4313	5350	2218629	0.0371496	0	two.sided	FALSE	TRUE	0.091219	-1.27258	HS6ST1
SMPD4	1037	4313	5350	2365838	1.63791e-07	0	two.sided	FALSE	TRUE	1.59885e-06	0.65103	SMPD4
MZT2B	1037	4313	5350	2318831	0.055005	0	two.sided	FALSE	TRUE	0.12371	0.0743036	MZT2B
CCDC115	1037	4313	5350	2.17389e+06	0.0280399	0	two.sided	FALSE	TRUE	0.0728572	-0.27306	CCDC115
IMP4	1037	4313	5350	2247975	0.696441	0	two.sided	FALSE	TRUE	0.795966	0.0329145	IMP4
PTPN18	1037	4313	5350	2.0622e+06	2.99935e-07	0	two.sided	FALSE	TRUE	2.81379e-06	-0.506171	PTPN18
FAM168B	1037	4313	5350	2260656	0.2719	0	two.sided	FALSE	TRUE	0.416458	0.142405	FAM168B
PLEKHB2	1037	4313	5350	2.299e+06	0.0167327	0	two.sided	FALSE	TRUE	0.0476987	0.299793	PLEKHB2
MZT2A	1037	4313	5350	2.30728e+06	0.0655149	0	two.sided	FALSE	TRUE	0.141835	0.108031	MZT2A
MGAT5	1037	4313	5350	2264777	0.0717613	0	two.sided	FALSE	TRUE	0.151835	0.385945	MGAT5
CCNT2	1037	4313	5350	2.26496e+06	0.29137	0	two.sided	FALSE	TRUE	0.437287	0.107907	CCNT2
RAB3GAP1	1037	4313	5350	2.26915e+06	0.0137224	0	two.sided	FALSE	TRUE	0.0406181	0.708372	RAB3GAP1
ZRANB3	1037	4313	5350	2.23089e+06	0.514488	0	two.sided	FALSE	TRUE	0.647612	-0.317973	ZRANB3
R3HDM1	1037	4313	5350	2.18386e+06	0.0314366	0	two.sided	FALSE	TRUE	0.0799188	-0.31641	R3HDM1
UBXN4	1037	4313	5350	2.46549e+06	1.104e-08	0	two.sided	FALSE	TRUE	1.27899e-07	0.311114	UBXN4
MCM6	1037	4313	5350	2311629	4.01626e-05	0	two.sided	FALSE	TRUE	0.000254257	0.745885	MCM6
DARS	1037	4313	5350	2194623	0.145975	0	two.sided	FALSE	TRUE	0.261704	-0.200091	DARS
CXCR4	1037	4313	5350	2.48905e+06	1.16281e-08	0	two.sided	FALSE	TRUE	1.34111e-07	0.158314	CXCR4
SPOPL	1037	4313	5350	2279496	0.0311084	0	two.sided	FALSE	TRUE	0.0792789	0.395817	SPOPL
ARHGAP15	1037	4313	5350	2.38714e+06	7.60095e-05	0	two.sided	FALSE	TRUE	0.00044882	0.30023	ARHGAP15
GTDC1	1037	4313	5350	2.26964e+06	0.187107	0	two.sided	FALSE	TRUE	0.316443	0.180946	GTDC1
ZEB2	1037	4313	5350	2.16917e+06	0.115293	0	two.sided	FALSE	TRUE	0.218657	-0.0680985	ZEB2
ZEB2-AS1	1037	4313	5350	2.23575e+06	0.948449	0	two.sided	FALSE	TRUE	0.968625	0.0370335	ZEB2-AS1
ORC4	1037	4313	5350	2.2477e+06	0.575462	0	two.sided	FALSE	TRUE	0.697818	0.0948414	ORC4
MBD5	1037	4313	5350	2.3253e+06	0.00204395	0	two.sided	FALSE	TRUE	0.00807984	0.348551	MBD5
EPC2	1037	4313	5350	2.279e+06	0.0407903	0	two.sided	FALSE	TRUE	0.0981317	0.32238	EPC2
MMADHC	1037	4313	5350	2.35135e+06	0.000402089	0	two.sided	FALSE	TRUE	0.001946	0.322282	MMADHC
RBM43	1037	4313	5350	2260313	0.169554	0	two.sided	FALSE	TRUE	0.293952	0.273136	RBM43
NMI	1037	4313	5350	2.22611e+06	0.629201	0	two.sided	FALSE	TRUE	0.742721	-0.0932093	NMI
RIF1	1037	4313	5350	2.31754e+06	0.00207511	0	two.sided	FALSE	TRUE	0.00818738	0.386812	RIF1
ARL5A	1037	4313	5350	2093706	4.56623e-06	0	two.sided	FALSE	TRUE	3.49022e-05	-0.541775	ARL5A
STAM2	1037	4313	5350	2.22005e+06	0.203346	0	two.sided	FALSE	TRUE	0.337185	-0.403232	STAM2
PRPF40A	1037	4313	5350	2591184	1.15773e-20	0	two.sided	FALSE	TRUE	3.99687e-19	0.567107	PRPF40A
ARL6IP6	1037	4313	5350	2196705	0.0628211	0	two.sided	FALSE	TRUE	0.137005	-0.379941	ARL6IP6
NR4A2	1037	4313	5350	2.87232e+06	5.71121e-57	0	two.sided	FALSE	TRUE	1.18302e-54	0.956569	NR4A2
GPD2	1037	4313	5350	2.24177e+06	0.614414	0	two.sided	FALSE	TRUE	0.730008	0.130382	GPD2
ERMN	1037	4313	5350	2264781	0.00653709	0	two.sided	FALSE	TRUE	0.021812	0.916659	ERMN
CYTIP	1037	4313	5350	2.68598e+06	2.75133e-26	0	two.sided	FALSE	TRUE	1.36998e-24	0.460115	CYTIP
ACVR1	1037	4313	5350	2232713	0.604527	0	two.sided	FALSE	TRUE	0.721989	-0.345875	ACVR1
PKP4	1037	4313	5350	2.25014e+06	0.0916896	0	two.sided	FALSE	TRUE	0.183585	0.674723	PKP4
WDSUB1	1037	4313	5350	2234702	0.930196	0	two.sided	FALSE	TRUE	0.957754	-0.0395498	WDSUB1
BAZ2B	1037	4313	5350	2277230	0.0701887	0	two.sided	FALSE	TRUE	0.149515	0.263537	BAZ2B
AC009961.1	1037	4313	5350	2226690	0.361811	0	two.sided	FALSE	TRUE	0.508588	-0.402657	AC009961.1
MARCH7	1037	4313	5350	2.13003e+06	0.000179578	0	two.sided	FALSE	TRUE	0.000957721	-0.446911	MARCH7
LY75	1037	4313	5350	2.20685e+06	0.00454146	0	two.sided	FALSE	TRUE	0.0159282	-1.47361	LY75
RBMS1	1037	4313	5350	2250648	0.691107	0	two.sided	FALSE	TRUE	0.791196	0.0152725	RBMS1
TANK	1037	4313	5350	2437063	6.90101e-12	0	two.sided	FALSE	TRUE	1.15466e-10	0.698344	TANK
PSMD14	1037	4313	5350	2.31513e+06	0.00851604	0	two.sided	FALSE	TRUE	0.0272906	0.260267	PSMD14
DPP4	1037	4313	5350	2268967	0.000129708	0	two.sided	FALSE	TRUE	0.000716853	1.35345	DPP4
IFIH1	1037	4313	5350	2.41146e+06	3.10424e-18	0	two.sided	FALSE	TRUE	8.73657e-17	1.43627	IFIH1
GCA	1037	4313	5350	2.27335e+06	0.000519437	0	two.sided	FALSE	TRUE	0.0024343	1.03366	GCA
GALNT3	1037	4313	5350	2.25787e+06	0.303304	0	two.sided	FALSE	TRUE	0.449149	0.143397	GALNT3
AC009495.3	1037	4313	5350	2.2253e+06	0.325386	0	two.sided	FALSE	TRUE	0.471794	-0.382109	AC009495.3
TTC21B	1037	4313	5350	2265353	0.162574	0	two.sided	FALSE	TRUE	0.285047	0.256059	TTC21B
STK39	1037	4313	5350	2135287	0.00059968	0	two.sided	FALSE	TRUE	0.00274818	-0.463948	STK39
CERS6	1037	4313	5350	2244697	0.522206	0	two.sided	FALSE	TRUE	0.653829	0.13737	CERS6
FASTKD1	1037	4313	5350	2.20801e+06	0.0184267	0	two.sided	FALSE	TRUE	0.0514687	-0.877238	FASTKD1
PPIG	1037	4313	5350	2.33898e+06	0.00469644	0	two.sided	FALSE	TRUE	0.0163885	0.208018	PPIG
PHOSPHO2	1037	4313	5350	2.25154e+06	0.174149	0	two.sided	FALSE	TRUE	0.300111	0.400396	PHOSPHO2
SSB	1037	4313	5350	2319638	0.0264578	0	two.sided	FALSE	TRUE	0.0694777	0.163877	SSB
METTL5	1037	4313	5350	2.15978e+06	0.00345812	0	two.sided	FALSE	TRUE	0.0126112	-0.420612	METTL5
UBR3	1037	4313	5350	2.21186e+06	0.245436	0	two.sided	FALSE	TRUE	0.387749	-0.181823	UBR3
GORASP2	1037	4313	5350	2.33694e+06	0.0021946	0	two.sided	FALSE	TRUE	0.00859661	0.249825	GORASP2
TLK1	1037	4313	5350	2281384	0.149025	0	two.sided	FALSE	TRUE	0.26625	0.132376	TLK1
METTL8	1037	4313	5350	2.21816e+06	0.16097	0	two.sided	FALSE	TRUE	0.282571	-0.350121	METTL8
DCAF17	1037	4313	5350	2.20958e+06	0.103797	0	two.sided	FALSE	TRUE	0.201958	-0.370155	DCAF17
DYNC1I2	1037	4313	5350	2197315	0.0265571	0	two.sided	FALSE	TRUE	0.0696335	-0.510111	DYNC1I2
SLC25A12	1037	4313	5350	2.20295e+06	0.0910766	0	two.sided	FALSE	TRUE	0.182594	-0.31849	SLC25A12
HAT1	1037	4313	5350	2.28122e+06	0.0820061	0	two.sided	FALSE	TRUE	0.168559	0.22728	HAT1
METAP1D	1037	4313	5350	2.24735e+06	0.258508	0	two.sided	FALSE	TRUE	0.401044	0.388291	METAP1D
ITGA6	1037	4313	5350	2.22407e+06	0.528026	0	two.sided	FALSE	TRUE	0.658016	-0.100044	ITGA6
AC078883.1	1037	4313	5350	2219045	0.125837	0	two.sided	FALSE	TRUE	0.233859	-0.489483	AC078883.1
PDK1	1037	4313	5350	2220374	0.331463	0	two.sided	FALSE	TRUE	0.477729	-0.27826	PDK1
MAP3K20	1037	4313	5350	2.24431e+06	0.548979	0	two.sided	FALSE	TRUE	0.675832	0.141737	MAP3K20
CDCA7	1037	4313	5350	2.21213e+06	0.10531	0	two.sided	FALSE	TRUE	0.204174	-0.353947	CDCA7
SP3	1037	4313	5350	2365276	0.000109262	0	two.sided	FALSE	TRUE	0.000616845	0.31659	SP3
OLA1	1037	4313	5350	2.20707e+06	0.345219	0	two.sided	FALSE	TRUE	0.49181	-0.108215	OLA1
CIR1	1037	4313	5350	2.52554e+06	4.20644e-16	0	two.sided	FALSE	TRUE	1.0179e-14	0.612038	CIR1
SCRN3	1037	4313	5350	2226698	0.424072	0	two.sided	FALSE	TRUE	0.568632	-0.269318	SCRN3
GPR155	1037	4313	5350	2.22962e+06	0.591796	0	two.sided	FALSE	TRUE	0.712453	-0.124562	GPR155
WIPF1	1037	4313	5350	2.35449e+06	0.00582585	0	two.sided	FALSE	TRUE	0.0197055	0.115665	WIPF1
AC010894.4	1037	4313	5350	2.22952e+06	0.332535	0	two.sided	FALSE	TRUE	0.478941	-0.637642	AC010894.4
ATF2	1037	4313	5350	2321956	0.000678139	0	two.sided	FALSE	TRUE	0.00306374	0.41771	ATF2
ATP5MC3	1037	4313	5350	2.06659e+06	3.91062e-05	0	two.sided	FALSE	TRUE	0.00024848	-0.227424	ATP5MC3
LNPK	1037	4313	5350	2214705	0.27564	0	two.sided	FALSE	TRUE	0.420566	-0.198814	LNPK
MTX2	1037	4313	5350	2.21626e+06	0.119148	0	two.sided	FALSE	TRUE	0.224245	-0.546482	MTX2
HNRNPA3	1037	4313	5350	2186903	0.247823	0	two.sided	FALSE	TRUE	0.390314	-0.0430311	HNRNPA3
NFE2L2	1037	4313	5350	2.30988e+06	0.0058222	0	two.sided	FALSE	TRUE	0.0196996	0.322817	NFE2L2
AGPS	1037	4313	5350	2.23547e+06	0.970328	0	two.sided	FALSE	TRUE	0.982374	-0.035946	AGPS
TTC30B	1037	4313	5350	2.23147e+06	0.5726	0	two.sided	FALSE	TRUE	0.695997	-0.332134	TTC30B
TTC30A	1037	4313	5350	2.22199e+06	0.113381	0	two.sided	FALSE	TRUE	0.21598	-0.811621	TTC30A
RBM45	1037	4313	5350	2.23196e+06	0.769939	0	two.sided	FALSE	TRUE	0.850088	-0.128686	RBM45
AC009948.1	1037	4313	5350	2230202	0.426783	0	two.sided	FALSE	TRUE	0.571453	-0.465189	AC009948.1
PRKRA	1037	4313	5350	2306727	0.00266368	0	two.sided	FALSE	TRUE	0.0101277	0.434921	PRKRA
PLEKHA3	1037	4313	5350	2.27574e+06	0.1685	0	two.sided	FALSE	TRUE	0.29281	0.158867	PLEKHA3
TTN-AS1	1037	4313	5350	2213645	0.181907	0	two.sided	FALSE	TRUE	0.310158	-0.282801	TTN-AS1
TTN	1037	4313	5350	2.19881e+06	0.0755301	0	two.sided	FALSE	TRUE	0.158033	-0.37137	TTN
CCDC141	1037	4313	5350	2.22573e+06	0.390914	0	two.sided	FALSE	TRUE	0.537319	-0.291476	CCDC141
SESTD1	1037	4313	5350	2.20981e+06	0.00532406	0	two.sided	FALSE	TRUE	0.0182406	-1.63697	SESTD1
CWC22	1037	4313	5350	2240861	0.814311	0	two.sided	FALSE	TRUE	0.880908	0.052407	CWC22
UBE2E3	1037	4313	5350	2195675	0.230893	0	two.sided	FALSE	TRUE	0.371444	-0.0891051	UBE2E3
LINC01934	1037	4313	5350	2.24567e+06	0.565681	0	two.sided	FALSE	TRUE	0.690078	0.106598	LINC01934
ITGA4	1037	4313	5350	2.06648e+06	6.81604e-05	0	two.sided	FALSE	TRUE	0.000406646	-0.184717	ITGA4
SSFA2	1037	4313	5350	2.27918e+06	0.0149745	0	two.sided	FALSE	TRUE	0.0437739	0.480318	SSFA2
DNAJC10	1037	4313	5350	2168379	0.00195237	0	two.sided	FALSE	TRUE	0.00775928	-0.566317	DNAJC10
NCKAP1	1037	4313	5350	2.23616e+06	0.986487	0	two.sided	FALSE	TRUE	0.991658	-0.0257381	NCKAP1
NUP35	1037	4313	5350	2.22912e+06	0.526489	0	two.sided	FALSE	TRUE	0.65697	-0.221485	NUP35
ZC3H15	1037	4313	5350	2581729	1.19536e-17	0	two.sided	FALSE	TRUE	3.22404e-16	0.47179	ZC3H15
ITGAV	1037	4313	5350	2273948	0.0123797	0	two.sided	FALSE	TRUE	0.0372507	0.538219	ITGAV
WDR75	1037	4313	5350	2.26817e+06	0.122242	0	two.sided	FALSE	TRUE	0.22882	0.220348	WDR75
ASNSD1	1037	4313	5350	2.33016e+06	8.69197e-05	0	two.sided	FALSE	TRUE	0.000504895	0.520308	ASNSD1
ANKAR	1037	4313	5350	2.22309e+06	0.520399	0	two.sided	FALSE	TRUE	0.652395	-0.0976238	ANKAR
OSGEPL1	1037	4313	5350	2.21223e+06	0.0203738	0	two.sided	FALSE	TRUE	0.0560753	-1.06337	OSGEPL1
ORMDL1	1037	4313	5350	2157493	0.0124638	0	two.sided	FALSE	TRUE	0.0374711	-0.280943	ORMDL1
PMS1	1037	4313	5350	2.14721e+06	0.000427559	0	two.sided	FALSE	TRUE	0.00205296	-0.552299	PMS1
HIBCH	1037	4313	5350	2.20786e+06	0.0793154	0	two.sided	FALSE	TRUE	0.164163	-0.409293	HIBCH
INPP1	1037	4313	5350	2.22148e+06	0.169401	0	two.sided	FALSE	TRUE	0.293785	-0.512856	INPP1
MFSD6	1037	4313	5350	2236664	0.985957	0	two.sided	FALSE	TRUE	0.991317	-0.0117917	MFSD6
NEMP2	1037	4313	5350	2.21341e+06	0.0338038	0	two.sided	FALSE	TRUE	0.0848125	-0.931505	NEMP2
NAB1	1037	4313	5350	2250898	0.325281	0	two.sided	FALSE	TRUE	0.471773	0.335874	NAB1
AC005540.1	1037	4313	5350	2.23755e+06	0.856811	0	two.sided	FALSE	TRUE	0.909487	0.0952796	AC005540.1
GLS	1037	4313	5350	2.40679e+06	1.23074e-05	0	two.sided	FALSE	TRUE	8.72273e-05	0.293086	GLS
STAT1	1037	4313	5350	2084880	2.09722e-06	0	two.sided	FALSE	TRUE	1.70094e-05	-0.549499	STAT1
STAT4	1037	4313	5350	2363881	0.000617563	0	two.sided	FALSE	TRUE	0.00282139	0.238823	STAT4
NABP1	1037	4313	5350	2.34443e+06	1.97434e-10	0	two.sided	FALSE	TRUE	2.87599e-09	1.16739	NABP1
SLC39A10	1037	4313	5350	2298963	0.0196315	0	two.sided	FALSE	TRUE	0.054321	0.287563	SLC39A10
STK17B	1037	4313	5350	2.69531e+06	1.79925e-26	0	two.sided	FALSE	TRUE	9.00233e-25	0.40502	STK17B
GTF3C3	1037	4313	5350	2221871	0.414902	0	two.sided	FALSE	TRUE	0.559523	-0.171261	GTF3C3
PGAP1	1037	4313	5350	2243732	0.475353	0	two.sided	FALSE	TRUE	0.614466	0.165612	PGAP1
ANKRD44	1037	4313	5350	1.99465e+06	4.59353e-10	0	two.sided	FALSE	TRUE	6.33491e-09	-0.471349	ANKRD44
AC013264.1	1037	4313	5350	2.23119e+06	0.591372	0	two.sided	FALSE	TRUE	0.712219	-0.281854	AC013264.1
SF3B1	1037	4313	5350	2540354	1.36636e-12	0	two.sided	FALSE	TRUE	2.44833e-11	0.282541	SF3B1
COQ10B	1037	4313	5350	2.32528e+06	0.00593893	0	two.sided	FALSE	TRUE	0.0200357	0.217658	COQ10B
HSPD1	1037	4313	5350	2414638	4.95439e-08	0	two.sided	FALSE	TRUE	5.2094e-07	0.537778	HSPD1
HSPE1	1037	4313	5350	2.34857e+06	0.00347777	0	two.sided	FALSE	TRUE	0.0126694	0.247449	HSPE1
MOB4	1037	4313	5350	2276393	0.131329	0	two.sided	FALSE	TRUE	0.241552	0.199603	MOB4
MARS2	1037	4313	5350	2.21756e+06	0.0709565	0	two.sided	FALSE	TRUE	0.150624	-0.806487	MARS2
PLCL1	1037	4313	5350	2.2638e+06	0.0274583	0	two.sided	FALSE	TRUE	0.0716156	0.589441	PLCL1
C2orf69	1037	4313	5350	2302470	0.00010696	0	two.sided	FALSE	TRUE	0.000605678	0.725026	C2orf69
TYW5	1037	4313	5350	2283508	0.000447886	0	two.sided	FALSE	TRUE	0.00214173	0.834136	TYW5
MAIP1	1037	4313	5350	2.23641e+06	0.994251	0	two.sided	FALSE	TRUE	0.99675	0.00755244	MAIP1
SPATS2L	1037	4313	5350	2246082	0.502564	0	two.sided	FALSE	TRUE	0.637409	0.194489	SPATS2L
KCTD18	1037	4313	5350	2214552	0.221928	0	two.sided	FALSE	TRUE	0.35993	-0.237859	KCTD18
SGO2	1037	4313	5350	2222943	0.120747	0	two.sided	FALSE	TRUE	0.226619	-0.842807	SGO2
BZW1	1037	4313	5350	2314361	0.0628379	0	two.sided	FALSE	TRUE	0.137013	0.0967351	BZW1
CLK1	1037	4313	5350	2607166	2.45341e-21	0	two.sided	FALSE	TRUE	8.91578e-20	0.545653	CLK1
PPIL3	1037	4313	5350	2.24387e+06	0.615469	0	two.sided	FALSE	TRUE	0.73101	0.0751598	PPIL3
NIF3L1	1037	4313	5350	2213750	0.0890429	0	two.sided	FALSE	TRUE	0.179594	-0.570959	NIF3L1
ORC2	1037	4313	5350	2217525	0.279268	0	two.sided	FALSE	TRUE	0.423915	-0.230238	ORC2
AC005037.1	1037	4313	5350	2.24722e+06	0.325998	0	two.sided	FALSE	TRUE	0.472483	0.287024	AC005037.1
FAM126B	1037	4313	5350	2.25114e+06	0.454977	0	two.sided	FALSE	TRUE	0.597159	0.164768	FAM126B
NDUFB3	1037	4313	5350	2098512	4.49669e-07	0	two.sided	FALSE	TRUE	4.0817e-06	-0.746236	NDUFB3
CFLAR	1037	4313	5350	2.14484e+06	0.0211664	0	two.sided	FALSE	TRUE	0.0577655	-0.14393	CFLAR
CASP8	1037	4313	5350	2.29011e+06	0.174469	0	two.sided	FALSE	TRUE	0.300562	0.0873871	CASP8
TRAK2	1037	4313	5350	2.21867e+06	0.375159	0	two.sided	FALSE	TRUE	0.521851	-0.145949	TRAK2
STRADB	1037	4313	5350	2.21878e+06	0.158943	0	two.sided	FALSE	TRUE	0.279675	-0.508472	STRADB
TMEM237	1037	4313	5350	2222780	0.0889069	0	two.sided	FALSE	TRUE	0.17946	-1.04548	TMEM237
ALS2	1037	4313	5350	2219916	0.134038	0	two.sided	FALSE	TRUE	0.245401	-0.567207	ALS2
SUMO1	1037	4313	5350	2.2807e+06	0.237327	0	two.sided	FALSE	TRUE	0.378037	0.0986688	SUMO1
NOP58	1037	4313	5350	2571467	8.35703e-18	0	two.sided	FALSE	TRUE	2.27773e-16	0.542473	NOP58
BMPR2	1037	4313	5350	2238784	0.823397	0	two.sided	FALSE	TRUE	0.887217	0.12533	BMPR2
FAM117B	1037	4313	5350	2284148	0.00264105	0	two.sided	FALSE	TRUE	0.010049	0.5468	FAM117B
ICA1L	1037	4313	5350	2234346	0.78317	0	two.sided	FALSE	TRUE	0.860298	-0.243031	ICA1L
WDR12	1037	4313	5350	2.21729e+06	0.0889811	0	two.sided	FALSE	TRUE	0.179524	-0.683684	WDR12
CARF	1037	4313	5350	2.24414e+06	0.500047	0	two.sided	FALSE	TRUE	0.635458	0.153131	CARF
NBEAL1	1037	4313	5350	2.25018e+06	0.510801	0	two.sided	FALSE	TRUE	0.644381	0.154674	NBEAL1
CYP20A1	1037	4313	5350	2.19916e+06	0.120566	0	two.sided	FALSE	TRUE	0.226354	-0.243427	CYP20A1
ABI2	1037	4313	5350	2225279	0.53224	0	two.sided	FALSE	TRUE	0.661754	-0.162993	ABI2
CD28	1037	4313	5350	2442630	2.4205e-29	0	two.sided	FALSE	TRUE	1.45751e-27	1.69912	CD28
CTLA4	1037	4313	5350	2232425	0.770608	0	two.sided	FALSE	TRUE	0.850419	-0.127121	CTLA4
ICOS	1037	4313	5350	2.30747e+06	3.18966e-05	0	two.sided	FALSE	TRUE	0.000205869	0.790412	ICOS
INO80D	1037	4313	5350	2.33895e+06	9.15992e-05	0	two.sided	FALSE	TRUE	0.0005297	0.479729	INO80D
AC007383.2	1037	4313	5350	2233526	0.812285	0	two.sided	FALSE	TRUE	0.87936	-0.0747198	AC007383.2
NDUFS1	1037	4313	5350	2189155	0.0227579	0	two.sided	FALSE	TRUE	0.0615252	-0.4633	NDUFS1
EEF1B2	1037	4313	5350	2.5277e+06	5.1063e-11	0	two.sided	FALSE	TRUE	7.86993e-10	0.0936028	EEF1B2
ZDBF2	1037	4313	5350	2330668	7.51547e-11	0	two.sided	FALSE	TRUE	1.14131e-09	1.36765	ZDBF2
FASTKD2	1037	4313	5350	2228037	0.68742	0	two.sided	FALSE	TRUE	0.788087	-0.102865	FASTKD2
KLF7	1037	4313	5350	2241273	0.578772	0	two.sided	FALSE	TRUE	0.700765	0.278769	KLF7
CREB1	1037	4313	5350	2.23014e+06	0.801923	0	two.sided	FALSE	TRUE	0.870767	-0.0278583	CREB1
METTL21A	1037	4313	5350	2.26569e+06	0.0620371	0	two.sided	FALSE	TRUE	0.135724	0.384844	METTL21A
CCNYL1	1037	4313	5350	2.26274e+06	0.0619808	0	two.sided	FALSE	TRUE	0.13563	0.4033	CCNYL1
PLEKHM3	1037	4313	5350	2.21322e+06	0.0781842	0	two.sided	FALSE	TRUE	0.162308	-0.553589	PLEKHM3
IDH1	1037	4313	5350	2.22337e+06	0.115648	0	two.sided	FALSE	TRUE	0.219171	-0.95253	IDH1
PIKFYVE	1037	4313	5350	2238238	0.931778	0	two.sided	FALSE	TRUE	0.958525	-0.0022165	PIKFYVE
RPE	1037	4313	5350	2212133	0.0626108	0	two.sided	FALSE	TRUE	0.136719	-0.597646	RPE
LANCL1	1037	4313	5350	2.25057e+06	0.525267	0	two.sided	FALSE	TRUE	0.656312	0.0851468	LANCL1
IKZF2	1037	4313	5350	2178608	0.00206217	0	two.sided	FALSE	TRUE	0.00814255	-0.639888	IKZF2
SPAG16	1037	4313	5350	2.24514e+06	0.433927	0	two.sided	FALSE	TRUE	0.577732	0.225051	SPAG16
BARD1	1037	4313	5350	2240017	0.756169	0	two.sided	FALSE	TRUE	0.839855	0.0537587	BARD1
ATIC	1037	4313	5350	2.12655e+06	4.54378e-06	0	two.sided	FALSE	TRUE	3.47562e-05	-0.776868	ATIC
MREG	1037	4313	5350	2.23536e+06	0.918403	0	two.sided	FALSE	TRUE	0.949765	-0.0566634	MREG
PECR	1037	4313	5350	2.19273e+06	0.00397591	0	two.sided	FALSE	TRUE	0.0141799	-0.848428	PECR
XRCC5	1037	4313	5350	2.00987e+06	3.996e-09	0	two.sided	FALSE	TRUE	4.89203e-08	-0.441104	XRCC5
SMARCAL1	1037	4313	5350	2217061	0.112954	0	two.sided	FALSE	TRUE	0.215485	-0.592958	SMARCAL1
RPL37A	1037	4313	5350	2.39782e+06	0.000285135	0	two.sided	FALSE	TRUE	0.00143148	0.0420514	RPL37A
ARPC2	1037	4313	5350	1692033	4.728e-35	0	two.sided	FALSE	TRUE	3.73801e-33	-0.339482	ARPC2
AAMP	1037	4313	5350	2.22187e+06	0.577932	0	two.sided	FALSE	TRUE	0.700156	-0.076765	AAMP
PNKD	1037	4313	5350	2.10629e+06	6.12146e-06	0	two.sided	FALSE	TRUE	4.60755e-05	-0.593046	PNKD
TMBIM1	1037	4313	5350	2237763	0.957519	0	two.sided	FALSE	TRUE	0.973598	0.00210417	TMBIM1
SLC11A1	1037	4313	5350	2247551	0.187246	0	two.sided	FALSE	TRUE	0.31657	0.536049	SLC11A1
CTDSP1	1037	4313	5350	1.97315e+06	1.81663e-14	0	two.sided	FALSE	TRUE	3.86342e-13	-0.806877	CTDSP1
USP37	1037	4313	5350	2.27651e+06	0.00839699	0	two.sided	FALSE	TRUE	0.0270141	0.63231	USP37
CNOT9	1037	4313	5350	2.30562e+06	0.000797502	0	two.sided	FALSE	TRUE	0.00351627	0.545605	CNOT9
ZNF142	1037	4313	5350	2.23111e+06	0.777564	0	two.sided	FALSE	TRUE	0.856082	-0.0365851	ZNF142
BCS1L	1037	4313	5350	2.21878e+06	0.194232	0	two.sided	FALSE	TRUE	0.325881	-0.370931	BCS1L
RNF25	1037	4313	5350	2215275	0.208084	0	two.sided	FALSE	TRUE	0.343228	-0.33347	RNF25
STK36	1037	4313	5350	2.2233e+06	0.0989617	0	two.sided	FALSE	TRUE	0.194598	-1.0015	STK36
TTLL4	1037	4313	5350	2.22033e+06	0.0733552	0	two.sided	FALSE	TRUE	0.154482	-1.03691	TTLL4
CNPPD1	1037	4313	5350	2136331	0.00227507	0	two.sided	FALSE	TRUE	0.00887156	-0.309807	CNPPD1
RETREG2	1037	4313	5350	2130001	0.000214909	0	two.sided	FALSE	TRUE	0.00111962	-0.454484	RETREG2
ZFAND2B	1037	4313	5350	2196574	0.207704	0	two.sided	FALSE	TRUE	0.34282	-0.148686	ZFAND2B
ATG9A	1037	4313	5350	2.2409e+06	0.775367	0	two.sided	FALSE	TRUE	0.854578	0.068453	ATG9A
ANKZF1	1037	4313	5350	2155793	0.000679847	0	two.sided	FALSE	TRUE	0.00306939	-0.517208	ANKZF1
STK16	1037	4313	5350	2211096	0.273749	0	two.sided	FALSE	TRUE	0.418544	-0.142266	STK16
TUBA4A	1037	4313	5350	2569804	2.81064e-17	0	two.sided	FALSE	TRUE	7.35097e-16	0.562214	TUBA4A
DNAJB2	1037	4313	5350	2.35366e+06	2.41299e-08	0	two.sided	FALSE	TRUE	2.66148e-07	0.81921	DNAJB2
DNPEP	1037	4313	5350	2204366	0.253093	0	two.sided	FALSE	TRUE	0.395785	-0.153396	DNPEP
GMPPA	1037	4313	5350	2.20607e+06	0.079421	0	two.sided	FALSE	TRUE	0.164348	-0.415263	GMPPA
CHPF	1037	4313	5350	2.24726e+06	0.380975	0	two.sided	FALSE	TRUE	0.527226	0.262235	CHPF
STK11IP	1037	4313	5350	2.21139e+06	0.0408044	0	two.sided	FALSE	TRUE	0.0981317	-0.640259	STK11IP
EPHA4	1037	4313	5350	2263180	0.0156261	0	two.sided	FALSE	TRUE	0.0452824	0.631443	EPHA4
FARSB	1037	4313	5350	2.23406e+06	0.88591	0	two.sided	FALSE	TRUE	0.928775	-0.054842	FARSB
ACSL3	1037	4313	5350	2305559	0.00212355	0	two.sided	FALSE	TRUE	0.00835622	0.440369	ACSL3
WDFY1	1037	4313	5350	2278050	0.114073	0	two.sided	FALSE	TRUE	0.21686	0.198571	WDFY1
MRPL44	1037	4313	5350	2.18721e+06	0.0798855	0	two.sided	FALSE	TRUE	0.165112	-0.236404	MRPL44
CUL3	1037	4313	5350	2492483	1.59184e-12	0	two.sided	FALSE	TRUE	2.82305e-11	0.502696	CUL3
DOCK10	1037	4313	5350	2.24505e+06	0.792357	0	two.sided	FALSE	TRUE	0.865933	0.0276899	DOCK10
RHBDD1	1037	4313	5350	2233491	0.809955	0	two.sided	FALSE	TRUE	0.877387	-0.104522	RHBDD1
MFF	1037	4313	5350	2236497	0.995017	0	two.sided	FALSE	TRUE	0.996965	0.00444025	MFF
AGFG1	1037	4313	5350	2267975	0.202559	0	two.sided	FALSE	TRUE	0.336214	0.16534	AGFG1
TRIP12	1037	4313	5350	2207222	0.302463	0	two.sided	FALSE	TRUE	0.448476	-0.10361	TRIP12
SP110	1037	4313	5350	2132858	0.00561297	0	two.sided	FALSE	TRUE	0.019104	-0.215224	SP110
SP140	1037	4313	5350	2.30208e+06	0.0493668	0	two.sided	FALSE	TRUE	0.113696	0.199809	SP140
SP140L	1037	4313	5350	2.37235e+06	9.72137e-06	0	two.sided	FALSE	TRUE	7.07244e-05	0.437584	SP140L
SP100	1037	4313	5350	2.20969e+06	0.504529	0	two.sided	FALSE	TRUE	0.639272	-0.0605401	SP100
CAB39	1037	4313	5350	2.21466e+06	0.444302	0	two.sided	FALSE	TRUE	0.586793	-0.0872271	CAB39
ITM2C	1037	4313	5350	2280047	0.00034225	0	two.sided	FALSE	TRUE	0.00169036	0.813883	ITM2C
GPR55	1037	4313	5350	2214165	0.0253307	0	two.sided	FALSE	TRUE	0.0670116	-1.22391	GPR55
PSMD1	1037	4313	5350	2.12636e+06	3.9388e-06	0	two.sided	FALSE	TRUE	3.03754e-05	-0.821088	PSMD1
NCL	1037	4313	5350	1857364	2.72351e-18	0	two.sided	FALSE	TRUE	7.70693e-17	-0.334685	NCL
NMUR1	1037	4313	5350	2.18878e+06	0.000106692	0	two.sided	FALSE	TRUE	0.000604493	-1.81935	NMUR1
PTMA	1037	4313	5350	2702219	1.39417e-25	0	two.sided	FALSE	TRUE	6.62357e-24	0.103015	PTMA
PDE6D	1037	4313	5350	2.14612e+06	6.0489e-05	0	two.sided	FALSE	TRUE	0.000367031	-0.762448	PDE6D
COPS7B	1037	4313	5350	2213036	0.223487	0	two.sided	FALSE	TRUE	0.362061	-0.252264	COPS7B
DIS3L2	1037	4313	5350	2.26637e+06	0.164698	0	two.sided	FALSE	TRUE	0.287812	0.225612	DIS3L2
TIGD1	1037	4313	5350	2.24083e+06	0.742883	0	two.sided	FALSE	TRUE	0.831968	0.0905657	TIGD1
EIF4E2	1037	4313	5350	2221365	0.625099	0	two.sided	FALSE	TRUE	0.739565	-0.0609828	EIF4E2
AC073254.1	1037	4313	5350	2.24045e+06	0.606269	0	two.sided	FALSE	TRUE	0.723203	0.176971	AC073254.1
GIGYF2	1037	4313	5350	2218887	0.386348	0	two.sided	FALSE	TRUE	0.533003	-0.185223	GIGYF2
INPP5D	1037	4313	5350	2183746	0.138818	0	two.sided	FALSE	TRUE	0.252103	-0.121779	INPP5D
ATG16L1	1037	4313	5350	2257096	0.374861	0	two.sided	FALSE	TRUE	0.521674	0.114096	ATG16L1
DGKD	1037	4313	5350	2206673	0.296158	0	two.sided	FALSE	TRUE	0.442463	-0.162709	DGKD
USP40	1037	4313	5350	2226333	0.158686	0	two.sided	FALSE	TRUE	0.279515	-0.923459	USP40
ARL4C	1037	4313	5350	2.30772e+06	0.106215	0	two.sided	FALSE	TRUE	0.205581	0.0403417	ARL4C
AGAP1	1037	4313	5350	2.23783e+06	0.907539	0	two.sided	FALSE	TRUE	0.943145	0.00545371	AGAP1
COPS8	1037	4313	5350	2194597	0.116483	0	two.sided	FALSE	TRUE	0.220149	-0.228064	COPS8
COL6A3	1037	4313	5350	2.2395e+06	0.707167	0	two.sided	FALSE	TRUE	0.804938	0.114038	COL6A3
LRRFIP1	1037	4313	5350	1.99827e+06	1.37036e-08	0	two.sided	FALSE	TRUE	1.56136e-07	-0.300071	LRRFIP1
UBE2F	1037	4313	5350	2.20365e+06	0.0887709	0	two.sided	FALSE	TRUE	0.17929	-0.338461	UBE2F
SCLY	1037	4313	5350	2.21341e+06	0.0338038	0	two.sided	FALSE	TRUE	0.0848125	-0.937705	SCLY
ILKAP	1037	4313	5350	2.26303e+06	0.370866	0	two.sided	FALSE	TRUE	0.517454	0.0994712	ILKAP
HES6	1037	4313	5350	2216481	0.0975241	0	two.sided	FALSE	TRUE	0.192568	-0.619367	HES6
PER2	1037	4313	5350	2.32907e+06	4.50164e-09	0	two.sided	FALSE	TRUE	5.45942e-08	1.14515	PER2
TRAF3IP1	1037	4313	5350	2223614	0.393306	0	two.sided	FALSE	TRUE	0.539461	-0.228343	TRAF3IP1
ASB1	1037	4313	5350	2.18476e+06	0.0120832	0	two.sided	FALSE	TRUE	0.0365283	-0.517096	ASB1
HDAC4	1037	4313	5350	2249353	0.426315	0	two.sided	FALSE	TRUE	0.570901	0.139934	HDAC4
AC062017.1	1037	4313	5350	2.2387e+06	0.800677	0	two.sided	FALSE	TRUE	0.870398	0.0609377	AC062017.1
NDUFA10	1037	4313	5350	2230954	0.868976	0	two.sided	FALSE	TRUE	0.917897	0.00599918	NDUFA10
COPS9	1037	4313	5350	2.10346e+06	0.000459227	0	two.sided	FALSE	TRUE	0.00218572	-0.269293	COPS9
ANKMY1	1037	4313	5350	2.25123e+06	0.306357	0	two.sided	FALSE	TRUE	0.452115	0.223974	ANKMY1
DUSP28	1037	4313	5350	2.22356e+06	0.414356	0	two.sided	FALSE	TRUE	0.559079	-0.0796473	DUSP28
RNPEPL1	1037	4313	5350	1.92849e+06	4.90283e-16	0	two.sided	FALSE	TRUE	1.1809e-14	-0.671313	RNPEPL1
CAPN10	1037	4313	5350	2203061	0.06435	0	two.sided	FALSE	TRUE	0.13981	-0.444387	CAPN10
MTERF4	1037	4313	5350	2.22573e+06	0.692679	0	two.sided	FALSE	TRUE	0.792541	-0.0651433	MTERF4
PASK	1037	4313	5350	2382172	1.00982e-13	0	two.sided	FALSE	TRUE	1.98835e-12	1.13311	PASK
PPP1R7	1037	4313	5350	2.20177e+06	0.288294	0	two.sided	FALSE	TRUE	0.43355	-0.0925435	PPP1R7
HDLBP	1037	4313	5350	2169416	0.00782012	0	two.sided	FALSE	TRUE	0.0254056	-0.438884	HDLBP
SEPT2	1037	4313	5350	2325977	0.0117619	0	two.sided	FALSE	TRUE	0.0357343	0.196629	SEPT2
FARP2	1037	4313	5350	2247654	0.354089	0	two.sided	FALSE	TRUE	0.501202	0.263397	FARP2
STK25	1037	4313	5350	2.18219e+06	0.0340158	0	two.sided	FALSE	TRUE	0.0852205	-0.331555	STK25
THAP4	1037	4313	5350	2179614	0.0123837	0	two.sided	FALSE	TRUE	0.0372519	-0.413217	THAP4
ATG4B	1037	4313	5350	2.18256e+06	0.0473757	0	two.sided	FALSE	TRUE	0.110055	-0.252549	ATG4B
DTYMK	1037	4313	5350	2176250	0.000269466	0	two.sided	FALSE	TRUE	0.00136275	-1.03056	DTYMK
ING5	1037	4313	5350	2.27325e+06	0.148793	0	two.sided	FALSE	TRUE	0.265974	0.198731	ING5
D2HGDH	1037	4313	5350	2.26119e+06	0.206902	0	two.sided	FALSE	TRUE	0.341714	0.176087	D2HGDH
GAL3ST2	1037	4313	5350	2.26858e+06	0.000457761	0	two.sided	FALSE	TRUE	0.00218179	1.13902	GAL3ST2
PDCD1	1037	4313	5350	2276849	0.0183707	0	two.sided	FALSE	TRUE	0.0513814	0.528751	PDCD1
RTP5	1037	4313	5350	2241871	0.689114	0	two.sided	FALSE	TRUE	0.789508	0.0679872	RTP5
IL5RA	1037	4313	5350	2243354	0.434322	0	two.sided	FALSE	TRUE	0.578008	0.21675	IL5RA
TRNT1	1037	4313	5350	2231729	0.828529	0	two.sided	FALSE	TRUE	0.890985	-0.0620566	TRNT1
CRBN	1037	4313	5350	2286607	0.142982	0	two.sided	FALSE	TRUE	0.25808	0.109131	CRBN
SUMF1	1037	4313	5350	2.22377e+06	0.444191	0	two.sided	FALSE	TRUE	0.586793	-0.19038	SUMF1
SETMAR	1037	4313	5350	2.2215e+06	0.0342679	0	two.sided	FALSE	TRUE	0.0856732	-1.66783	SETMAR
ITPR1	1037	4313	5350	2259191	0.248054	0	two.sided	FALSE	TRUE	0.390556	0.16702	ITPR1
BHLHE40	1037	4313	5350	2.53671e+06	6.6403e-15	0	two.sided	FALSE	TRUE	1.45399e-13	0.542023	BHLHE40
ARL8B	1037	4313	5350	2.31278e+06	0.00909813	0	two.sided	FALSE	TRUE	0.0288693	0.251147	ARL8B
EDEM1	1037	4313	5350	2272115	0.0556122	0	two.sided	FALSE	TRUE	0.124859	0.3743	EDEM1
RAD18	1037	4313	5350	2.20434e+06	0.0425728	0	two.sided	FALSE	TRUE	0.101456	-0.520395	RAD18
THUMPD3-AS1	1037	4313	5350	2.25406e+06	0.445472	0	two.sided	FALSE	TRUE	0.587889	0.116468	THUMPD3-AS1
THUMPD3	1037	4313	5350	2.24959e+06	0.558691	0	two.sided	FALSE	TRUE	0.683643	0.0873168	THUMPD3
SETD5	1037	4313	5350	2.22011e+06	0.548689	0	two.sided	FALSE	TRUE	0.675556	-0.0669027	SETD5
MTMR14	1037	4313	5350	2.32513e+06	0.00108068	0	two.sided	FALSE	TRUE	0.00457777	0.346045	MTMR14
BRPF1	1037	4313	5350	2233566	0.893145	0	two.sided	FALSE	TRUE	0.933837	-0.0355856	BRPF1
OGG1	1037	4313	5350	2.19103e+06	0.00117456	0	two.sided	FALSE	TRUE	0.00492906	-1.15677	OGG1
TADA3	1037	4313	5350	2.02234e+06	3.16173e-11	0	two.sided	FALSE	TRUE	4.9766e-10	-0.793702	TADA3
ARPC4	1037	4313	5350	2267866	0.213065	0	two.sided	FALSE	TRUE	0.34944	0.134899	ARPC4
ARPC4-TTLL3	1037	4313	5350	2.22808e+06	0.404274	0	two.sided	FALSE	TRUE	0.550495	-0.402587	ARPC4-TTLL3
TTLL3	1037	4313	5350	2.24251e+06	0.582547	0	two.sided	FALSE	TRUE	0.703854	0.181546	TTLL3
RPUSD3	1037	4313	5350	2169628	0.00122919	0	two.sided	FALSE	TRUE	0.00513957	-0.654607	RPUSD3
JAGN1	1037	4313	5350	2.19022e+06	0.0207582	0	two.sided	FALSE	TRUE	0.0568987	-0.497424	JAGN1
IL17RC	1037	4313	5350	2.24326e+06	0.506052	0	two.sided	FALSE	TRUE	0.640575	0.196772	IL17RC
CRELD1	1037	4313	5350	2243555	0.655762	0	two.sided	FALSE	TRUE	0.763596	0.0953495	CRELD1
PRRT3	1037	4313	5350	2265958	0.00179643	0	two.sided	FALSE	TRUE	0.00720312	0.976732	PRRT3
EMC3	1037	4313	5350	2284445	0.152438	0	two.sided	FALSE	TRUE	0.270714	0.121951	EMC3
FANCD2	1037	4313	5350	2239790	0.757104	0	two.sided	FALSE	TRUE	0.840622	0.0746323	FANCD2
BRK1	1037	4313	5350	1.89639e+06	7.97792e-19	0	two.sided	FALSE	TRUE	2.35405e-17	-0.699845	BRK1
VHL	1037	4313	5350	2251835	0.600299	0	two.sided	FALSE	TRUE	0.718846	0.0648117	VHL
IRAK2	1037	4313	5350	2225830	0.143013	0	two.sided	FALSE	TRUE	0.258092	-0.843313	IRAK2
TATDN2	1037	4313	5350	2.2093e+06	0.175462	0	two.sided	FALSE	TRUE	0.30167	-0.259347	TATDN2
SEC13	1037	4313	5350	2162642	0.013419	0	two.sided	FALSE	TRUE	0.0398569	-0.296371	SEC13
ATG7	1037	4313	5350	2246102	0.547116	0	two.sided	FALSE	TRUE	0.674099	0.101706	ATG7
VGLL4	1037	4313	5350	2202116	0.129527	0	two.sided	FALSE	TRUE	0.239213	-0.218638	VGLL4
TAMM41	1037	4313	5350	2.26653e+06	0.0544459	0	two.sided	FALSE	TRUE	0.12266	0.446466	TAMM41
TSEN2	1037	4313	5350	2.21751e+06	0.023324	0	two.sided	FALSE	TRUE	0.0627773	-1.45681	TSEN2
MKRN2	1037	4313	5350	2.22017e+06	0.364321	0	two.sided	FALSE	TRUE	0.511215	-0.215372	MKRN2
RAF1	1037	4313	5350	2245435	0.714381	0	two.sided	FALSE	TRUE	0.810743	0.0395214	RAF1
RPL32	1037	4313	5350	2682984	1.377e-23	0	two.sided	FALSE	TRUE	5.72755e-22	0.0619523	RPL32
IQSEC1	1037	4313	5350	2.22352e+06	0.637905	0	two.sided	FALSE	TRUE	0.749358	-0.0790597	IQSEC1
NUP210	1037	4313	5350	2093109	1.06966e-05	0	two.sided	FALSE	TRUE	7.67735e-05	-0.488005	NUP210
CHCHD4	1037	4313	5350	2.22286e+06	0.104786	0	two.sided	FALSE	TRUE	0.203463	-0.93348	CHCHD4
TMEM43	1037	4313	5350	2.17299e+06	0.00313813	0	two.sided	FALSE	TRUE	0.0115911	-0.524895	TMEM43
AC093495.1	1037	4313	5350	2.25599e+06	0.0156076	0	two.sided	FALSE	TRUE	0.0452542	0.896244	AC093495.1
XPC	1037	4313	5350	2228469	0.736657	0	two.sided	FALSE	TRUE	0.827052	-0.022769	XPC
LSM3	1037	4313	5350	2143440	0.00428879	0	two.sided	FALSE	TRUE	0.0151469	-0.281982	LSM3
SLC6A6	1037	4313	5350	2269881	0.0658957	0	two.sided	FALSE	TRUE	0.142451	0.340619	SLC6A6
CCDC174	1037	4313	5350	2.27878e+06	0.0709258	0	two.sided	FALSE	TRUE	0.15059	0.227638	CCDC174
FGD5-AS1	1037	4313	5350	2173445	0.00979865	0	two.sided	FALSE	TRUE	0.0306971	-0.414462	FGD5-AS1
NR2C2	1037	4313	5350	2218507	0.429392	0	two.sided	FALSE	TRUE	0.573907	-0.126074	NR2C2
MRPS25	1037	4313	5350	2227588	0.673455	0	two.sided	FALSE	TRUE	0.77733	-0.104523	MRPS25
RBSN	1037	4313	5350	2310171	0.000287198	0	two.sided	FALSE	TRUE	0.00144003	0.603085	RBSN
CAPN7	1037	4313	5350	2377856	3.77324e-06	0	two.sided	FALSE	TRUE	2.92074e-05	0.447103	CAPN7
SH3BP5-AS1	1037	4313	5350	2216420	0.128005	0	two.sided	FALSE	TRUE	0.23691	-0.482934	SH3BP5-AS1
SH3BP5	1037	4313	5350	2.05629e+06	4.35965e-09	0	two.sided	FALSE	TRUE	5.29963e-08	-0.711562	SH3BP5
METTL6	1037	4313	5350	2.213e+06	0.0136711	0	two.sided	FALSE	TRUE	0.0404778	-1.39056	METTL6
EAF1	1037	4313	5350	2.25615e+06	0.344129	0	two.sided	FALSE	TRUE	0.490785	0.197954	EAF1
HACL1	1037	4313	5350	2.24094e+06	0.825026	0	two.sided	FALSE	TRUE	0.88814	0.020088	HACL1
BTD	1037	4313	5350	2.23595e+06	0.985191	0	two.sided	FALSE	TRUE	0.990923	0.0231666	BTD
ANKRD28	1037	4313	5350	2292067	0.000411364	0	two.sided	FALSE	TRUE	0.00198713	0.717514	ANKRD28
DPH3	1037	4313	5350	2.22611e+06	0.676171	0	two.sided	FALSE	TRUE	0.779649	-0.0680563	DPH3
OXNAD1	1037	4313	5350	2509321	1.39292e-17	0	two.sided	FALSE	TRUE	3.73743e-16	0.73331	OXNAD1
RFTN1	1037	4313	5350	2180481	0.104437	0	two.sided	FALSE	TRUE	0.202976	-0.12527	RFTN1
PLCL2	1037	4313	5350	2188880	0.109682	0	two.sided	FALSE	TRUE	0.210951	-0.181013	PLCL2
TBC1D5	1037	4313	5350	2.19687e+06	0.131022	0	two.sided	FALSE	TRUE	0.241028	-0.207254	TBC1D5
SATB1	1037	4313	5350	2429497	2.96928e-17	0	two.sided	FALSE	TRUE	7.68821e-16	1.08858	SATB1
RAB5A	1037	4313	5350	2438510	7.3369e-10	0	two.sided	FALSE	TRUE	9.84304e-09	0.537846	RAB5A
KAT2B	1037	4313	5350	2190261	0.06156	0	two.sided	FALSE	TRUE	0.134966	-0.25351	KAT2B
UBE2E1	1037	4313	5350	2.22726e+06	0.696436	0	two.sided	FALSE	TRUE	0.795966	-0.0968639	UBE2E1
NKIRAS1	1037	4313	5350	2233795	0.786529	0	two.sided	FALSE	TRUE	0.862019	-0.151748	NKIRAS1
RPL15	1037	4313	5350	2.45699e+06	7.18596e-07	0	two.sided	FALSE	TRUE	6.3072e-06	0.0431397	RPL15
NR1D2	1037	4313	5350	2.5389e+06	1.18234e-18	0	two.sided	FALSE	TRUE	3.43012e-17	0.666636	NR1D2
TOP2B	1037	4313	5350	2.21368e+06	0.307517	0	two.sided	FALSE	TRUE	0.453439	-0.174002	TOP2B
NGLY1	1037	4313	5350	2279085	0.150619	0	two.sided	FALSE	TRUE	0.268173	0.140023	NGLY1
OXSM	1037	4313	5350	2.2545e+06	0.119197	0	two.sided	FALSE	TRUE	0.224296	0.50587	OXSM
SLC4A7	1037	4313	5350	2.20453e+06	0.282841	0	two.sided	FALSE	TRUE	0.427648	-0.134201	SLC4A7
LINC02084	1037	4313	5350	2.19636e+06	0.0635323	0	two.sided	FALSE	TRUE	0.138352	-0.369413	LINC02084
EOMES	1037	4313	5350	2.15813e+06	0.0136069	0	two.sided	FALSE	TRUE	0.0403456	-0.256866	EOMES
CMC1	1037	4313	5350	1907894	2.86875e-14	0	two.sided	FALSE	TRUE	5.97819e-13	-0.362786	CMC1
AZI2	1037	4313	5350	2233885	0.917146	0	two.sided	FALSE	TRUE	0.948939	-0.032967	AZI2
TGFBR2	1037	4313	5350	2.3644e+06	0.00039931	0	two.sided	FALSE	TRUE	0.00193435	0.279127	TGFBR2
STT3B	1037	4313	5350	2.2952e+06	0.0797912	0	two.sided	FALSE	TRUE	0.16495	0.155932	STT3B
GPD1L	1037	4313	5350	2228722	0.451694	0	two.sided	FALSE	TRUE	0.594065	-0.289103	GPD1L
CMTM7	1037	4313	5350	2156693	0.00982568	0	two.sided	FALSE	TRUE	0.0307539	-0.304828	CMTM7
CMTM6	1037	4313	5350	2.29051e+06	0.0887977	0	two.sided	FALSE	TRUE	0.179309	0.160302	CMTM6
DYNC1LI1	1037	4313	5350	2.25994e+06	0.355853	0	two.sided	FALSE	TRUE	0.503293	0.085131	DYNC1LI1
CNOT10	1037	4313	5350	2248935	0.523099	0	two.sided	FALSE	TRUE	0.654539	0.0750237	CNOT10
GLB1	1037	4313	5350	2213343	0.212973	0	two.sided	FALSE	TRUE	0.349344	-0.25287	GLB1
CRTAP	1037	4313	5350	2256158	0.440745	0	two.sided	FALSE	TRUE	0.583658	0.147467	CRTAP
UBP1	1037	4313	5350	2207620	0.182755	0	two.sided	FALSE	TRUE	0.311161	-0.23933	UBP1
CLASP2	1037	4313	5350	2270413	0.158366	0	two.sided	FALSE	TRUE	0.279338	0.178159	CLASP2
PDCD6IP	1037	4313	5350	2176040	0.0433592	0	two.sided	FALSE	TRUE	0.10288	-0.234177	PDCD6IP
TRANK1	1037	4313	5350	2.16529e+06	0.00842066	0	two.sided	FALSE	TRUE	0.0270595	-0.327156	TRANK1
EPM2AIP1	1037	4313	5350	2256585	0.361951	0	two.sided	FALSE	TRUE	0.508715	0.134034	EPM2AIP1
MLH1	1037	4313	5350	2.24245e+06	0.75078	0	two.sided	FALSE	TRUE	0.836644	0.0731211	MLH1
LRRFIP2	1037	4313	5350	2.3224e+06	0.00218203	0	two.sided	FALSE	TRUE	0.00855383	0.356003	LRRFIP2
AC097359.2	1037	4313	5350	2234630	0.838514	0	two.sided	FALSE	TRUE	0.899016	-0.0239459	AC097359.2
GOLGA4	1037	4313	5350	2307112	0.0580971	0	two.sided	FALSE	TRUE	0.128957	0.121631	GOLGA4
VILL	1037	4313	5350	2.24173e+06	0.759394	0	two.sided	FALSE	TRUE	0.841811	0.0656887	VILL
PLCD1	1037	4313	5350	2.30673e+06	0.000468636	0	two.sided	FALSE	TRUE	0.00222543	0.566985	PLCD1
DLEC1	1037	4313	5350	2238656	0.743178	0	two.sided	FALSE	TRUE	0.832208	0.100342	DLEC1
ACAA1	1037	4313	5350	2129111	0.000111306	0	two.sided	FALSE	TRUE	0.000626863	-0.534849	ACAA1
MYD88	1037	4313	5350	2.11388e+06	4.38064e-06	0	two.sided	FALSE	TRUE	3.35579e-05	-0.6828	MYD88
OXSR1	1037	4313	5350	2247544	0.653308	0	two.sided	FALSE	TRUE	0.761901	0.0922632	OXSR1
EXOG	1037	4313	5350	2205467	0.103845	0	two.sided	FALSE	TRUE	0.201992	-0.336411	EXOG
WDR48	1037	4313	5350	2314529	0.00166345	0	two.sided	FALSE	TRUE	0.00671669	0.431361	WDR48
CSRNP1	1037	4313	5350	2875540	1.37718e-77	0	two.sided	FALSE	TRUE	4.91842e-75	1.42752	CSRNP1
CX3CR1	1037	4313	5350	1924387	2.21282e-30	0	two.sided	FALSE	TRUE	1.38062e-28	-2.4531	CX3CR1
SLC25A38	1037	4313	5350	2.33277e+06	0.000618417	0	two.sided	FALSE	TRUE	0.00282323	0.360232	SLC25A38
RPSA	1037	4313	5350	2.40199e+06	0.000198526	0	two.sided	FALSE	TRUE	0.00104585	0.0348917	RPSA
EIF1B	1037	4313	5350	2549957	5.38168e-17	0	two.sided	FALSE	TRUE	1.37286e-15	0.582171	EIF1B
ENTPD3-AS1	1037	4313	5350	2200671	0.000134689	0	two.sided	FALSE	TRUE	0.000742006	-3.20976	ENTPD3-AS1
RPL14	1037	4313	5350	2685532	6.83522e-24	0	two.sided	FALSE	TRUE	2.9253e-22	0.0737661	RPL14
ZNF619	1037	4313	5350	2239398	0.705183	0	two.sided	FALSE	TRUE	0.802856	0.0691261	ZNF619
ZNF621	1037	4313	5350	2233302	0.808796	0	two.sided	FALSE	TRUE	0.876591	-0.0272052	ZNF621
CTNNB1	1037	4313	5350	2341132	0.00101202	0	two.sided	FALSE	TRUE	0.00433658	0.291989	CTNNB1
ULK4	1037	4313	5350	2220461	0.369264	0	two.sided	FALSE	TRUE	0.516122	-0.177802	ULK4
TRAK1	1037	4313	5350	2223672	0.484439	0	two.sided	FALSE	TRUE	0.621342	-0.0984834	TRAK1
SEC22C	1037	4313	5350	2317972	0.000136122	0	two.sided	FALSE	TRUE	0.000749102	0.583488	SEC22C
SS18L2	1037	4313	5350	2.27162e+06	0.30862	0	two.sided	FALSE	TRUE	0.454482	0.0538784	SS18L2
NKTR	1037	4313	5350	2387988	8.40786e-05	0	two.sided	FALSE	TRUE	0.000490869	0.267339	NKTR
HIGD1A	1037	4313	5350	2.24165e+06	0.605505	0	two.sided	FALSE	TRUE	0.72274	0.169482	HIGD1A
POMGNT2	1037	4313	5350	2.22879e+06	0.455797	0	two.sided	FALSE	TRUE	0.597707	-0.193594	POMGNT2
SNRK	1037	4313	5350	2.30755e+06	0.0512908	0	two.sided	FALSE	TRUE	0.117163	0.139274	SNRK
ANO10	1037	4313	5350	2235328	0.928558	0	two.sided	FALSE	TRUE	0.956543	-0.0574196	ANO10
ABHD5	1037	4313	5350	2.23631e+06	0.999326	0	two.sided	FALSE	TRUE	0.999722	-0.0426386	ABHD5
TCAIM	1037	4313	5350	2233333	0.786705	0	two.sided	FALSE	TRUE	0.862121	-0.0433814	TCAIM
ZNF445	1037	4313	5350	2.21696e+06	0.173669	0	two.sided	FALSE	TRUE	0.299499	-0.371445	ZNF445
ZNF852	1037	4313	5350	2219270	0.0511606	0	two.sided	FALSE	TRUE	0.116918	-0.961006	ZNF852
ZNF197	1037	4313	5350	2221432	0.168094	0	two.sided	FALSE	TRUE	0.292204	-0.567513	ZNF197
KIAA1143	1037	4313	5350	2.24827e+06	0.676218	0	two.sided	FALSE	TRUE	0.779649	0.0397077	KIAA1143
TMEM42	1037	4313	5350	2216980	0.221295	0	two.sided	FALSE	TRUE	0.359127	-0.338064	TMEM42
ZDHHC3	1037	4313	5350	2.21235e+06	0.362509	0	two.sided	FALSE	TRUE	0.509224	-0.115189	ZDHHC3
EXOSC7	1037	4313	5350	2.20948e+06	0.22436	0	two.sided	FALSE	TRUE	0.363077	-0.248753	EXOSC7
LARS2	1037	4313	5350	2221406	0.276697	0	two.sided	FALSE	TRUE	0.421496	-0.349127	LARS2
LIMD1	1037	4313	5350	2215346	0.1332	0	two.sided	FALSE	TRUE	0.244385	-0.384775	LIMD1
SACM1L	1037	4313	5350	2266184	0.241001	0	two.sided	FALSE	TRUE	0.382419	0.114796	SACM1L
LZTFL1	1037	4313	5350	2.22902e+06	0.51177	0	two.sided	FALSE	TRUE	0.645192	-0.251177	LZTFL1
FYCO1	1037	4313	5350	2.26153e+06	0.211678	0	two.sided	FALSE	TRUE	0.34838	0.181757	FYCO1
CXCR6	1037	4313	5350	2237429	0.893172	0	two.sided	FALSE	TRUE	0.933837	0.244252	CXCR6
CCR5	1037	4313	5350	2.2281e+06	0.405193	0	two.sided	FALSE	TRUE	0.550742	-0.361194	CCR5
CCRL2	1037	4313	5350	2.24697e+06	0.197256	0	two.sided	FALSE	TRUE	0.329894	0.574351	CCRL2
CCDC12	1037	4313	5350	2.23871e+06	0.948725	0	two.sided	FALSE	TRUE	0.968625	0.014312	CCDC12
NBEAL2	1037	4313	5350	2184557	0.0627747	0	two.sided	FALSE	TRUE	0.136945	-0.233486	NBEAL2
SETD2	1037	4313	5350	2.39747e+06	6.93085e-06	0	two.sided	FALSE	TRUE	5.18287e-05	0.337442	SETD2
KIF9	1037	4313	5350	2.22861e+06	0.639232	0	two.sided	FALSE	TRUE	0.750184	-0.12121	KIF9
KLHL18	1037	4313	5350	2.25281e+06	0.417457	0	two.sided	FALSE	TRUE	0.562091	0.11935	KLHL18
AC099778.1	1037	4313	5350	2251417	0.0285216	0	two.sided	FALSE	TRUE	0.073868	0.880676	AC099778.1
PTPN23	1037	4313	5350	2207781	0.0905616	0	two.sided	FALSE	TRUE	0.181878	-0.363346	PTPN23
SCAP	1037	4313	5350	2192844	0.0323371	0	two.sided	FALSE	TRUE	0.0818065	-0.42956	SCAP
ELP6	1037	4313	5350	2172728	0.00167811	0	two.sided	FALSE	TRUE	0.00677064	-0.680652	ELP6
SMARCC1	1037	4313	5350	2173497	0.0769357	0	two.sided	FALSE	TRUE	0.160198	-0.173253	SMARCC1
DHX30	1037	4313	5350	2.22884e+06	0.783947	0	two.sided	FALSE	TRUE	0.860298	-0.0703811	DHX30
MAP4	1037	4313	5350	2039119	4.12902e-09	0	two.sided	FALSE	TRUE	5.04891e-08	-0.604469	MAP4
ZNF589	1037	4313	5350	2226654	0.255491	0	two.sided	FALSE	TRUE	0.397944	-0.602816	ZNF589
NME6	1037	4313	5350	2.15662e+06	2.75581e-06	0	two.sided	FALSE	TRUE	2.18378e-05	-1.42562	NME6
CCDC51	1037	4313	5350	2237033	0.916346	0	two.sided	FALSE	TRUE	0.948809	0.0553378	CCDC51
TMA7	1037	4313	5350	2.27484e+06	0.38245	0	two.sided	FALSE	TRUE	0.528773	0.0325083	TMA7
ATRIP	1037	4313	5350	2225793	0.475445	0	two.sided	FALSE	TRUE	0.614466	-0.161606	ATRIP
SHISA5	1037	4313	5350	1994023	4.97903e-10	0	two.sided	FALSE	TRUE	6.84832e-09	-0.448967	SHISA5
UQCRC1	1037	4313	5350	2.05817e+06	1.73779e-07	0	two.sided	FALSE	TRUE	1.68523e-06	-0.534812	UQCRC1
SLC26A6	1037	4313	5350	2223014	0.280632	0	two.sided	FALSE	TRUE	0.425426	-0.387967	SLC26A6
NCKIPSD	1037	4313	5350	2.23745e+06	0.895503	0	two.sided	FALSE	TRUE	0.935518	0.0556933	NCKIPSD
IP6K2	1037	4313	5350	2266539	0.224758	0	two.sided	FALSE	TRUE	0.363664	0.158481	IP6K2
PRKAR2A	1037	4313	5350	2227170	0.771284	0	two.sided	FALSE	TRUE	0.850942	-0.0205567	PRKAR2A
SLC25A20	1037	4313	5350	2.16379e+06	4.02145e-05	0	two.sided	FALSE	TRUE	0.000254275	-1.04199	SLC25A20
ARIH2OS	1037	4313	5350	2247843	0.488941	0	two.sided	FALSE	TRUE	0.625027	0.180661	ARIH2OS
ARIH2	1037	4313	5350	2364689	0.000862476	0	two.sided	FALSE	TRUE	0.00376112	0.207585	ARIH2
P4HTM	1037	4313	5350	2253643	0.427342	0	two.sided	FALSE	TRUE	0.57197	0.139547	P4HTM
WDR6	1037	4313	5350	2185998	0.0113809	0	two.sided	FALSE	TRUE	0.034791	-0.541204	WDR6
DALRD3	1037	4313	5350	2.18129e+06	0.00558824	0	two.sided	FALSE	TRUE	0.0190323	-0.589965	DALRD3
NDUFAF3	1037	4313	5350	2.08523e+06	2.81537e-07	0	two.sided	FALSE	TRUE	2.65321e-06	-0.700665	NDUFAF3
IMPDH2	1037	4313	5350	2212343	0.339818	0	two.sided	FALSE	TRUE	0.48585	-0.151172	IMPDH2
QRICH1	1037	4313	5350	2360494	5.94447e-05	0	two.sided	FALSE	TRUE	0.00036152	0.395607	QRICH1
QARS	1037	4313	5350	2.2356e+06	0.98074	0	two.sided	FALSE	TRUE	0.987798	0.0189082	QARS
USP19	1037	4313	5350	2.22305e+06	0.424298	0	two.sided	FALSE	TRUE	0.568862	-0.159751	USP19
CCDC71	1037	4313	5350	2.252e+06	0.254809	0	two.sided	FALSE	TRUE	0.397396	0.27985	CCDC71
C3orf62	1037	4313	5350	2252223	0.0448379	0	two.sided	FALSE	TRUE	0.105667	0.873318	C3orf62
USP4	1037	4313	5350	2.2063e+06	0.310099	0	two.sided	FALSE	TRUE	0.455947	-0.117938	USP4
RHOA	1037	4313	5350	2069092	0.000136089	0	two.sided	FALSE	TRUE	0.000749102	-0.0947513	RHOA
TCTA	1037	4313	5350	2221099	0.531302	0	two.sided	FALSE	TRUE	0.661143	-0.103947	TCTA
DAG1	1037	4313	5350	2.22414e+06	0.328574	0	two.sided	FALSE	TRUE	0.474887	-0.341097	DAG1
APEH	1037	4313	5350	2101121	2.57007e-07	0	two.sided	FALSE	TRUE	2.43089e-06	-0.804285	APEH
RNF123	1037	4313	5350	2.23035e+06	0.715673	0	two.sided	FALSE	TRUE	0.81141	-0.0641675	RNF123
GMPPB	1037	4313	5350	2211770	0.135349	0	two.sided	FALSE	TRUE	0.247183	-0.423647	GMPPB
IP6K1	1037	4313	5350	2.29604e+06	0.00120319	0	two.sided	FALSE	TRUE	0.00503901	0.593117	IP6K1
UBA7	1037	4313	5350	2.17884e+06	0.0136424	0	two.sided	FALSE	TRUE	0.0404045	-0.408894	UBA7
MON1A	1037	4313	5350	2.22395e+06	0.229473	0	two.sided	FALSE	TRUE	0.369791	-0.509777	MON1A
RBM6	1037	4313	5350	2.19127e+06	0.139433	0	two.sided	FALSE	TRUE	0.25313	-0.203649	RBM6
RBM5	1037	4313	5350	2.27343e+06	0.153405	0	two.sided	FALSE	TRUE	0.272058	0.199105	RBM5
GNAI2	1037	4313	5350	1852916	9.27155e-19	0	two.sided	FALSE	TRUE	2.72027e-17	-0.339408	GNAI2
IFRD2	1037	4313	5350	2.17058e+06	0.00074271	0	two.sided	FALSE	TRUE	0.00330423	-0.734044	IFRD2
NAA80	1037	4313	5350	2.21522e+06	0.130912	0	two.sided	FALSE	TRUE	0.241028	-0.394792	NAA80
TUSC2	1037	4313	5350	2139577	6.87803e-05	0	two.sided	FALSE	TRUE	0.000410108	-0.656563	TUSC2
RASSF1	1037	4313	5350	2103931	0.000632195	0	two.sided	FALSE	TRUE	0.00287601	-0.261669	RASSF1
RASSF1-AS1	1037	4313	5350	2.25332e+06	0.0365468	0	two.sided	FALSE	TRUE	0.0902085	0.804943	RASSF1-AS1
NPRL2	1037	4313	5350	2.17953e+06	0.0195609	0	two.sided	FALSE	TRUE	0.0541546	-0.358471	NPRL2
CYB561D2	1037	4313	5350	2.04378e+06	3.13247e-11	0	two.sided	FALSE	TRUE	4.93805e-10	-0.960996	CYB561D2
TMEM115	1037	4313	5350	2.18272e+06	0.00122645	0	two.sided	FALSE	TRUE	0.00513018	-0.8788	TMEM115
CACNA2D2	1037	4313	5350	2202955	0.0106678	0	two.sided	FALSE	TRUE	0.0330007	-0.940641	CACNA2D2
CYB561D2.1	1037	4313	5350	2214385	0.142018	0	two.sided	FALSE	TRUE	0.256743	-0.44524	CYB561D2.1
C3orf18	1037	4313	5350	2.20762e+06	0.00173332	0	two.sided	FALSE	TRUE	0.00697706	-1.90589	C3orf18
HEMK1	1037	4313	5350	2218413	0.29279	0	two.sided	FALSE	TRUE	0.438888	-0.230254	HEMK1
CISH	1037	4313	5350	2.21636e+06	0.0450809	0	two.sided	FALSE	TRUE	0.106066	-0.974752	CISH
MAPKAPK3	1037	4313	5350	2.16603e+06	0.00167703	0	two.sided	FALSE	TRUE	0.00676888	-0.5465	MAPKAPK3
MANF	1037	4313	5350	2151065	0.002297	0	two.sided	FALSE	TRUE	0.00893355	-0.399494	MANF
RBM15B	1037	4313	5350	2.20234e+06	0.212717	0	two.sided	FALSE	TRUE	0.349091	-0.192127	RBM15B
DCAF1	1037	4313	5350	2243378	0.670061	0	two.sided	FALSE	TRUE	0.774462	0.108568	DCAF1
RAD54L2	1037	4313	5350	2244092	0.581961	0	two.sided	FALSE	TRUE	0.70331	0.117808	RAD54L2
TEX264	1037	4313	5350	2067822	2.17662e-08	0	two.sided	FALSE	TRUE	2.42401e-07	-0.715152	TEX264
RRP9	1037	4313	5350	2219906	0.277585	0	two.sided	FALSE	TRUE	0.422123	-0.304519	RRP9
PARP3	1037	4313	5350	2254910	0.188858	0	two.sided	FALSE	TRUE	0.318567	0.330926	PARP3
PCBP4	1037	4313	5350	2.2158e+06	0.266058	0	two.sided	FALSE	TRUE	0.409627	-0.245918	PCBP4
ABHD14B	1037	4313	5350	2195953	0.260007	0	two.sided	FALSE	TRUE	0.402466	-0.0898007	ABHD14B
ABHD14A	1037	4313	5350	2244622	0.267683	0	two.sided	FALSE	TRUE	0.411517	0.501864	ABHD14A
ACY1	1037	4313	5350	2.22587e+06	0.272727	0	two.sided	FALSE	TRUE	0.41729	-0.494838	ACY1
RPL29	1037	4313	5350	2.38685e+06	0.000732077	0	two.sided	FALSE	TRUE	0.00326253	0.0270431	RPL29
DUSP7	1037	4313	5350	2227971	0.249107	0	two.sided	FALSE	TRUE	0.391622	-0.702512	DUSP7
ALAS1	1037	4313	5350	2226783	0.493156	0	two.sided	FALSE	TRUE	0.628939	-0.238903	ALAS1
TWF2	1037	4313	5350	2.07005e+06	2.03619e-07	0	two.sided	FALSE	TRUE	1.95992e-06	-0.578927	TWF2
PPM1M	1037	4313	5350	2.12324e+06	1.60396e-05	0	two.sided	FALSE	TRUE	0.000111193	-0.662393	PPM1M
WDR82	1037	4313	5350	2253448	0.573696	0	two.sided	FALSE	TRUE	0.696815	0.0493596	WDR82
GLYCTK	1037	4313	5350	2.22714e+06	0.628639	0	two.sided	FALSE	TRUE	0.742312	-0.123007	GLYCTK
DNAH1	1037	4313	5350	2.23404e+06	0.864204	0	two.sided	FALSE	TRUE	0.914542	-0.0712701	DNAH1
BAP1	1037	4313	5350	2224051	0.559008	0	two.sided	FALSE	TRUE	0.683844	-0.108697	BAP1
PHF7	1037	4313	5350	2221237	0.25036	0	two.sided	FALSE	TRUE	0.392953	-0.3598	PHF7
NISCH	1037	4313	5350	2.22554e+06	0.666606	0	two.sided	FALSE	TRUE	0.772508	-0.0580543	NISCH
SMIM4	1037	4313	5350	2.21526e+06	0.228492	0	two.sided	FALSE	TRUE	0.368555	-0.280599	SMIM4
PBRM1	1037	4313	5350	2097475	4.93099e-06	0	two.sided	FALSE	TRUE	3.75241e-05	-0.54907	PBRM1
GNL3	1037	4313	5350	2259943	0.25829	0	two.sided	FALSE	TRUE	0.400834	0.221414	GNL3
GLT8D1	1037	4313	5350	2149581	2.88237e-06	0	two.sided	FALSE	TRUE	2.2719e-05	-1.21224	GLT8D1
SPCS1	1037	4313	5350	2.10074e+06	0.000952675	0	two.sided	FALSE	TRUE	0.00411977	-0.189432	SPCS1
NEK4	1037	4313	5350	2.23675e+06	0.969194	0	two.sided	FALSE	TRUE	0.981998	-0.0186645	NEK4
SFMBT1	1037	4313	5350	2291417	2.41476e-05	0	two.sided	FALSE	TRUE	0.000160524	1.02919	SFMBT1
RFT1	1037	4313	5350	2.22634e+06	0.368994	0	two.sided	FALSE	TRUE	0.515884	-0.352477	RFT1
PRKCD	1037	4313	5350	2248057	0.492445	0	two.sided	FALSE	TRUE	0.628237	0.167107	PRKCD
TKT	1037	4313	5350	2167891	0.0457863	0	two.sided	FALSE	TRUE	0.107332	-0.17758	TKT
DCP1A	1037	4313	5350	2.40189e+06	2.49399e-08	0	two.sided	FALSE	TRUE	2.74098e-07	0.579913	DCP1A
ACTR8	1037	4313	5350	2.22668e+06	0.544302	0	two.sided	FALSE	TRUE	0.672152	-0.172425	ACTR8
SELENOK	1037	4313	5350	2810705	4.87339e-43	0	two.sided	FALSE	TRUE	5.60819e-41	0.67793	SELENOK
CCDC66	1037	4313	5350	2322868	9.31819e-05	0	two.sided	FALSE	TRUE	0.000537952	0.623723	CCDC66
FAM208A	1037	4313	5350	2.10289e+06	3.40093e-05	0	two.sided	FALSE	TRUE	0.000218507	-0.422102	FAM208A
ARHGEF3	1037	4313	5350	2.10117e+06	3.07524e-05	0	two.sided	FALSE	TRUE	0.000199688	-0.435249	ARHGEF3
APPL1	1037	4313	5350	2196408	0.167345	0	two.sided	FALSE	TRUE	0.291327	-0.133293	APPL1
PDE12	1037	4313	5350	2.29349e+06	0.0158576	0	two.sided	FALSE	TRUE	0.0458123	0.328802	PDE12
ARF4	1037	4313	5350	2303985	0.0352803	0	two.sided	FALSE	TRUE	0.0876885	0.230842	ARF4
ARF4-AS1	1037	4313	5350	2.25403e+06	0.0421195	0	two.sided	FALSE	TRUE	0.10056	0.78042	ARF4-AS1
DENND6A	1037	4313	5350	2.35818e+06	5.36674e-06	0	two.sided	FALSE	TRUE	4.06014e-05	0.550505	DENND6A
SLMAP	1037	4313	5350	2.22044e+06	0.513222	0	two.sided	FALSE	TRUE	0.64654	-0.0720913	SLMAP
FLNB	1037	4313	5350	2271196	0.0100939	0	two.sided	FALSE	TRUE	0.0314507	0.619142	FLNB
ABHD6	1037	4313	5350	2217122	0.0726758	0	two.sided	FALSE	TRUE	0.153188	-0.771774	ABHD6
RPP14	1037	4313	5350	2.26398e+06	0.0494789	0	two.sided	FALSE	TRUE	0.113879	0.481476	RPP14
HTD2	1037	4313	5350	2.23425e+06	0.817333	0	two.sided	FALSE	TRUE	0.882886	-0.114477	HTD2
PXK	1037	4313	5350	2186942	0.00392672	0	two.sided	FALSE	TRUE	0.0140432	-0.701715	PXK
PDHB	1037	4313	5350	2.14631e+06	9.14696e-05	0	two.sided	FALSE	TRUE	0.000529246	-0.701122	PDHB
[truncated: 8,359 more rows]

## Sheet: profile 2 vs 9
Description: This table records the significant differentially expressed genes between profile 2 and profile 9
obs.x	obs.y	obs.tot	statistic	pvalue	location.null	alternative	exact	corrected	qvalue	logFC	gene
AL669831.5	1244	11006	12250	6985303	0.00092843	0	two.sided	FALSE	TRUE	0.00548484	0.547116	AL669831.5
LINC00115	1244	11006	12250	6.94035e+06	0.00113344	0	two.sided	FALSE	TRUE	0.00652289	0.835464	LINC00115
FAM41C	1244	11006	12250	6.87348e+06	0.0234908	0	two.sided	FALSE	TRUE	0.0798356	1.12747	FAM41C
NOC2L	1244	11006	12250	6557354	6.84092e-05	0	two.sided	FALSE	TRUE	0.00054553	-0.485839	NOC2L
KLHL17	1244	11006	12250	6820073	0.461749	0	two.sided	FALSE	TRUE	0.646582	-0.208829	KLHL17
HES4	1244	11006	12250	6970166	2.95387e-10	0	two.sided	FALSE	TRUE	5.82672e-09	1.71708	HES4
ISG15	1244	11006	12250	6914992	0.430595	0	two.sided	FALSE	TRUE	0.620581	0.110464	ISG15
C1orf159	1244	11006	12250	6807665	0.299072	0	two.sided	FALSE	TRUE	0.495699	-0.249705	C1orf159
TNFRSF18	1244	11006	12250	6.89268e+06	0.104948	0	two.sided	FALSE	TRUE	0.240538	0.489416	TNFRSF18
TNFRSF4	1244	11006	12250	6830406	0.452862	0	two.sided	FALSE	TRUE	0.638655	-0.451946	TNFRSF4
SDF4	1244	11006	12250	6217338	6.90476e-11	0	two.sided	FALSE	TRUE	1.46967e-09	-0.503215	SDF4
B3GALT6	1244	11006	12250	6.64497e+06	3.19031e-06	0	two.sided	FALSE	TRUE	3.41411e-05	-1.28822	B3GALT6
UBE2J2	1244	11006	12250	6591964	0.000326367	0	two.sided	FALSE	TRUE	0.00219455	-0.445064	UBE2J2
ACAP3	1244	11006	12250	6.65e+06	0.000209715	0	two.sided	FALSE	TRUE	0.00148701	-0.679236	ACAP3
PUSL1	1244	11006	12250	6791970	0.12603	0	two.sided	FALSE	TRUE	0.274562	-0.418774	PUSL1
INTS11	1244	11006	12250	6733564	0.154538	0	two.sided	FALSE	TRUE	0.31711	-0.16652	INTS11
CPTP	1244	11006	12250	6.77962e+06	0.112227	0	two.sided	FALSE	TRUE	0.252767	-0.38791	CPTP
DVL1	1244	11006	12250	6822111	0.502017	0	two.sided	FALSE	TRUE	0.68186	-0.152469	DVL1
AURKAIP1	1244	11006	12250	6431241	2.80562e-05	0	two.sided	FALSE	TRUE	0.000244258	-0.286206	AURKAIP1
CCNL2	1244	11006	12250	6.93208e+06	0.251688	0	two.sided	FALSE	TRUE	0.441203	0.134498	CCNL2
MRPL20	1244	11006	12250	6.60678e+06	0.00513133	0	two.sided	FALSE	TRUE	0.0232729	-0.227728	MRPL20
ATAD3B	1244	11006	12250	6868075	0.590437	0	two.sided	FALSE	TRUE	0.754492	0.128356	ATAD3B
ATAD3A	1244	11006	12250	6786552	0.108105	0	two.sided	FALSE	TRUE	0.245972	-0.437052	ATAD3A
SSU72	1244	11006	12250	6.24389e+06	2.20194e-09	0	two.sided	FALSE	TRUE	3.86307e-08	-0.412772	SSU72
AL645728.1	1244	11006	12250	6.89494e+06	0.0440533	0	two.sided	FALSE	TRUE	0.129141	0.622962	AL645728.1
FNDC10	1244	11006	12250	6.81985e+06	0.396005	0	two.sided	FALSE	TRUE	0.589297	-0.250721	FNDC10
AL691432.2	1244	11006	12250	6801684	0.134128	0	two.sided	FALSE	TRUE	0.286279	-0.484701	AL691432.2
MIB2	1244	11006	12250	6.62527e+06	0.00640323	0	two.sided	FALSE	TRUE	0.027821	-0.249925	MIB2
MMP23B	1244	11006	12250	6547379	3.77975e-05	0	two.sided	FALSE	TRUE	0.000318065	-0.491259	MMP23B
CDK11B	1244	11006	12250	6999097	0.0236976	0	two.sided	FALSE	TRUE	0.0803262	0.226921	CDK11B
SLC35E2B	1244	11006	12250	6769360	0.129631	0	two.sided	FALSE	TRUE	0.279881	-0.249652	SLC35E2B
CDK11A	1244	11006	12250	6921680	0.369742	0	two.sided	FALSE	TRUE	0.565226	0.0705884	CDK11A
SLC35E2A	1244	11006	12250	6937743	0.00983035	0	two.sided	FALSE	TRUE	0.0394954	0.48481	SLC35E2A
NADK	1244	11006	12250	6680172	0.00424684	0	two.sided	FALSE	TRUE	0.0199328	-0.45943	NADK
GNB1	1244	11006	12250	6.36418e+06	4.23606e-06	0	two.sided	FALSE	TRUE	4.42284e-05	-0.280249	GNB1
PRKCZ	1244	11006	12250	6.76532e+06	0.0299657	0	two.sided	FALSE	TRUE	0.0957958	-0.572792	PRKCZ
FAAP20	1244	11006	12250	6.42181e+06	5.82011e-06	0	two.sided	FALSE	TRUE	5.88569e-05	-0.353498	FAAP20
SKI	1244	11006	12250	6.84361e+06	0.962747	0	two.sided	FALSE	TRUE	0.982518	-0.00392435	SKI
MORN1	1244	11006	12250	6842572	0.842172	0	two.sided	FALSE	TRUE	0.918481	-0.135172	MORN1
RER1	1244	11006	12250	6361717	2.21344e-08	0	two.sided	FALSE	TRUE	3.38566e-07	-0.535183	RER1
PEX10	1244	11006	12250	6796441	0.116993	0	two.sided	FALSE	TRUE	0.260562	-0.470684	PEX10
PLCH2	1244	11006	12250	6.86021e+06	0.579593	0	two.sided	FALSE	TRUE	0.746128	0.122066	PLCH2
PANK4	1244	11006	12250	6.87998e+06	0.339598	0	two.sided	FALSE	TRUE	0.536307	0.20825	PANK4
AL139246.5	1244	11006	12250	7094341	0.000135873	0	two.sided	FALSE	TRUE	0.00101305	0.474608	AL139246.5
TNFRSF14-AS1	1244	11006	12250	6912680	0.00493839	0	two.sided	FALSE	TRUE	0.0225747	0.78845	TNFRSF14-AS1
TNFRSF14	1244	11006	12250	6.86851e+06	0.830309	0	two.sided	FALSE	TRUE	0.91313	0.0197677	TNFRSF14
FAM213B	1244	11006	12250	6851651	0.822571	0	two.sided	FALSE	TRUE	0.908194	0.038219	FAM213B
TPRG1L	1244	11006	12250	6690005	0.0587934	0	two.sided	FALSE	TRUE	0.159617	-0.159421	TPRG1L
WRAP73	1244	11006	12250	6793689	0.381269	0	two.sided	FALSE	TRUE	0.575155	-0.126062	WRAP73
SMIM1	1244	11006	12250	6.83425e+06	0.36945	0	two.sided	FALSE	TRUE	0.565053	-0.745864	SMIM1
LRRC47	1244	11006	12250	6759866	0.180313	0	two.sided	FALSE	TRUE	0.353274	-0.190257	LRRC47
CEP104	1244	11006	12250	6.81626e+06	0.59766	0	two.sided	FALSE	TRUE	0.759034	-0.0950564	CEP104
DFFB	1244	11006	12250	6.79965e+06	0.170712	0	two.sided	FALSE	TRUE	0.339868	-0.383501	DFFB
C1orf174	1244	11006	12250	6.6004e+06	0.00132701	0	two.sided	FALSE	TRUE	0.00745897	-0.34323	C1orf174
NPHP4	1244	11006	12250	6833864	0.492567	0	two.sided	FALSE	TRUE	0.673997	-0.399041	NPHP4
KCNAB2	1244	11006	12250	6.49414e+06	0.0001151	0	two.sided	FALSE	TRUE	0.00086994	-0.343546	KCNAB2
RPL22	1244	11006	12250	6.06077e+06	2.23968e-11	0	two.sided	FALSE	TRUE	5.05522e-10	-0.0901732	RPL22
ICMT	1244	11006	12250	6710444	0.00132862	0	two.sided	FALSE	TRUE	0.0074644	-0.771568	ICMT
GPR153	1244	11006	12250	6.82422e+06	0.466996	0	two.sided	FALSE	TRUE	0.651252	-0.239351	GPR153
ACOT7	1244	11006	12250	6778859	0.164226	0	two.sided	FALSE	TRUE	0.331111	-0.283108	ACOT7
AL031848.2	1244	11006	12250	6836454	0.558763	0	two.sided	FALSE	TRUE	0.728676	-0.348048	AL031848.2
TNFRSF25	1244	11006	12250	6.88005e+06	0.480686	0	two.sided	FALSE	TRUE	0.663221	0.175619	TNFRSF25
NOL9	1244	11006	12250	6853787	0.887316	0	two.sided	FALSE	TRUE	0.941985	0.0084827	NOL9
ZBTB48	1244	11006	12250	6843097	0.951499	0	two.sided	FALSE	TRUE	0.977241	-0.0248768	ZBTB48
KLHL21	1244	11006	12250	6.85355e+06	0.869137	0	two.sided	FALSE	TRUE	0.932185	0.0457003	KLHL21
PHF13	1244	11006	12250	6.81658e+06	0.230352	0	two.sided	FALSE	TRUE	0.416562	-0.431324	PHF13
THAP3	1244	11006	12250	6.83073e+06	0.707776	0	two.sided	FALSE	TRUE	0.835662	-0.0780272	THAP3
DNAJC11	1244	11006	12250	6.77207e+06	0.085585	0	two.sided	FALSE	TRUE	0.209069	-0.356005	DNAJC11
CAMTA1-DT	1244	11006	12250	6845060	0.9653	0	two.sided	FALSE	TRUE	0.983452	-0.0499797	CAMTA1-DT
CAMTA1	1244	11006	12250	7.0811e+06	0.00154359	0	two.sided	FALSE	TRUE	0.00847471	0.286056	CAMTA1
VAMP3	1244	11006	12250	6858902	0.799804	0	two.sided	FALSE	TRUE	0.894258	0.0478393	VAMP3
PER3	1244	11006	12250	6897098	0.1001	0	two.sided	FALSE	TRUE	0.232977	0.440325	PER3
UTS2	1244	11006	12250	6797767	0.0744675	0	two.sided	FALSE	TRUE	0.188513	-0.697397	UTS2
TNFRSF9	1244	11006	12250	6866804	0.440479	0	two.sided	FALSE	TRUE	0.628427	0.189951	TNFRSF9
PARK7	1244	11006	12250	6.55774e+06	0.00894615	0	two.sided	FALSE	TRUE	0.0367462	-0.127764	PARK7
ERRFI1	1244	11006	12250	6806051	0.195553	0	two.sided	FALSE	TRUE	0.373775	-0.314546	ERRFI1
SLC45A1	1244	11006	12250	6796974	0.0400443	0	two.sided	FALSE	TRUE	0.120216	-0.985102	SLC45A1
RERE	1244	11006	12250	6.85342e+06	0.890762	0	two.sided	FALSE	TRUE	0.944172	0.0476607	RERE
ENO1	1244	11006	12250	5.59913e+06	1.12637e-29	0	two.sided	FALSE	TRUE	8.30716e-28	-0.57969	ENO1
GPR157	1244	11006	12250	6838317	0.633375	0	two.sided	FALSE	TRUE	0.785882	-0.29709	GPR157
H6PD	1244	11006	12250	6758973	0.0646616	0	two.sided	FALSE	TRUE	0.170745	-0.340469	H6PD
SPSB1	1244	11006	12250	6836967	0.601854	0	two.sided	FALSE	TRUE	0.762756	-0.331514	SPSB1
SLC25A33	1244	11006	12250	6.8581e+06	0.768956	0	two.sided	FALSE	TRUE	0.875313	0.0767922	SLC25A33
TMEM201	1244	11006	12250	6.84697e+06	0.952413	0	two.sided	FALSE	TRUE	0.977658	0.00321533	TMEM201
PIK3CD	1244	11006	12250	6.98466e+06	0.0739638	0	two.sided	FALSE	TRUE	0.187566	0.156452	PIK3CD
PIK3CD-AS1	1244	11006	12250	6880046	0.0191489	0	two.sided	FALSE	TRUE	0.0680259	1.03495	PIK3CD-AS1
CLSTN1	1244	11006	12250	6609968	0.00341233	0	two.sided	FALSE	TRUE	0.0165473	-0.289185	CLSTN1
CTNNBIP1	1244	11006	12250	6758918	0.0626464	0	two.sided	FALSE	TRUE	0.167216	-0.353826	CTNNBIP1
LZIC	1244	11006	12250	6.77233e+06	0.197198	0	two.sided	FALSE	TRUE	0.3758	-0.205214	LZIC
NMNAT1	1244	11006	12250	6830036	0.40349	0	two.sided	FALSE	TRUE	0.595996	-0.448583	NMNAT1
UBE4B	1244	11006	12250	6.79279e+06	0.373318	0	two.sided	FALSE	TRUE	0.567948	-0.132987	UBE4B
KIF1B	1244	11006	12250	7057703	2.6303e-07	0	two.sided	FALSE	TRUE	3.43363e-06	0.867744	KIF1B
PGD	1244	11006	12250	6728076	0.0473296	0	two.sided	FALSE	TRUE	0.13592	-0.309782	PGD
DFFA	1244	11006	12250	6785438	0.227078	0	two.sided	FALSE	TRUE	0.413161	-0.203696	DFFA
PEX14	1244	11006	12250	6719341	0.0023734	0	two.sided	FALSE	TRUE	0.0122304	-0.770846	PEX14
CASZ1	1244	11006	12250	7067020	3.70689e-06	0	two.sided	FALSE	TRUE	3.90911e-05	0.686888	CASZ1
AL139423.1	1244	11006	12250	6861049	0.299496	0	two.sided	FALSE	TRUE	0.496047	0.521223	AL139423.1
TARDBP	1244	11006	12250	6.83119e+06	0.726177	0	two.sided	FALSE	TRUE	0.848391	-0.058844	TARDBP
AL109811.3	1244	11006	12250	6856590	0.512979	0	two.sided	FALSE	TRUE	0.690511	0.280004	AL109811.3
SRM	1244	11006	12250	6.13878e+06	5.15697e-16	0	two.sided	FALSE	TRUE	1.84869e-14	-0.808913	SRM
EXOSC10	1244	11006	12250	6.85788e+06	0.872643	0	two.sided	FALSE	TRUE	0.933698	0.0205063	EXOSC10
MTOR	1244	11006	12250	6.89311e+06	0.399534	0	two.sided	FALSE	TRUE	0.592344	0.112007	MTOR
UBIAD1	1244	11006	12250	6.68471e+06	0.00420507	0	two.sided	FALSE	TRUE	0.0197688	-0.476544	UBIAD1
FBXO2	1244	11006	12250	6.81626e+06	0.250263	0	two.sided	FALSE	TRUE	0.439793	-0.467413	FBXO2
FBXO44	1244	11006	12250	6.8157e+06	0.648733	0	two.sided	FALSE	TRUE	0.797673	-0.0600279	FBXO44
FBXO6	1244	11006	12250	6806007	0.498942	0	two.sided	FALSE	TRUE	0.679421	-0.0874626	FBXO6
MAD2L2	1244	11006	12250	6.70758e+06	0.101071	0	two.sided	FALSE	TRUE	0.234435	-0.15593	MAD2L2
DRAXIN	1244	11006	12250	6935082	0.000797794	0	two.sided	FALSE	TRUE	0.0048163	0.87341	DRAXIN
AGTRAP	1244	11006	12250	6.2634e+06	1.3525e-11	0	two.sided	FALSE	TRUE	3.13839e-10	-0.676112	AGTRAP
MTHFR	1244	11006	12250	6916692	0.0674812	0	two.sided	FALSE	TRUE	0.175588	0.359159	MTHFR
CLCN6	1244	11006	12250	6813367	0.347428	0	two.sided	FALSE	TRUE	0.544346	-0.282144	CLCN6
KIAA2013	1244	11006	12250	6328395	1.8626e-11	0	two.sided	FALSE	TRUE	4.27071e-10	-0.837785	KIAA2013
PLOD1	1244	11006	12250	6.5609e+06	3.49369e-06	0	two.sided	FALSE	TRUE	3.70792e-05	-0.773483	PLOD1
MFN2	1244	11006	12250	6.90207e+06	0.160342	0	two.sided	FALSE	TRUE	0.325834	0.258717	MFN2
MIIP	1244	11006	12250	6545730	9.26887e-06	0	two.sided	FALSE	TRUE	8.98863e-05	-0.601826	MIIP
TNFRSF1B	1244	11006	12250	6723484	0.237037	0	two.sided	FALSE	TRUE	0.423753	-0.0675314	TNFRSF1B
VPS13D	1244	11006	12250	6.84766e+06	0.97502	0	two.sided	FALSE	TRUE	0.987586	-0.00510482	VPS13D
DHRS3	1244	11006	12250	6842641	0.927821	0	two.sided	FALSE	TRUE	0.965771	0.0493637	DHRS3
PRDM2	1244	11006	12250	7.17489e+06	9.8035e-05	0	two.sided	FALSE	TRUE	0.00075375	0.303703	PRDM2
FHAD1	1244	11006	12250	6850652	0.80729	0	two.sided	FALSE	TRUE	0.898204	0.0218141	FHAD1
AL031283.1	1244	11006	12250	6975513	5.21602e-09	0	two.sided	FALSE	TRUE	8.71519e-08	1.55869	AL031283.1
EFHD2	1244	11006	12250	5262929	1.42642e-41	0	two.sided	FALSE	TRUE	1.60355e-39	-0.248205	EFHD2
CASP9	1244	11006	12250	6.8906e+06	0.150868	0	two.sided	FALSE	TRUE	0.311723	0.333221	CASP9
DNAJC16	1244	11006	12250	6838641	0.821887	0	two.sided	FALSE	TRUE	0.907902	-0.0586906	DNAJC16
AGMAT	1244	11006	12250	6815492	0.0803634	0	two.sided	FALSE	TRUE	0.19947	-1.23037	AGMAT
DDI2	1244	11006	12250	7.08152e+06	1.37565e-07	0	two.sided	FALSE	TRUE	1.87395e-06	0.810218	DDI2
PLEKHM2	1244	11006	12250	6.93859e+06	0.195164	0	two.sided	FALSE	TRUE	0.373337	0.147327	PLEKHM2
UQCRHL	1244	11006	12250	6.8334e+06	0.769536	0	two.sided	FALSE	TRUE	0.875354	-0.0876026	UQCRHL
AL450998.2	1244	11006	12250	6945758	0.0358613	0	two.sided	FALSE	TRUE	0.110436	0.291728	AL450998.2
SPEN	1244	11006	12250	7008569	0.0497354	0	two.sided	FALSE	TRUE	0.140804	0.145235	SPEN
ZBTB17	1244	11006	12250	6847375	0.971395	0	two.sided	FALSE	TRUE	0.985685	0.00514721	ZBTB17
ARHGEF19	1244	11006	12250	6824114	0.488181	0	two.sided	FALSE	TRUE	0.670619	-0.173308	ARHGEF19
CPLANE2	1244	11006	12250	6831668	0.333143	0	two.sided	FALSE	TRUE	0.530527	-0.688394	CPLANE2
FBXO42	1244	11006	12250	7035180	0.000494633	0	two.sided	FALSE	TRUE	0.00316079	0.448046	FBXO42
SZRD1	1244	11006	12250	6.80705e+06	0.658449	0	two.sided	FALSE	TRUE	0.804493	-0.0387982	SZRD1
NECAP2	1244	11006	12250	6827287	0.795588	0	two.sided	FALSE	TRUE	0.891869	-0.0402597	NECAP2
AL137802.2	1244	11006	12250	6872867	0.0285031	0	two.sided	FALSE	TRUE	0.0921633	1.11145	AL137802.2
NBPF1	1244	11006	12250	6951700	0.00363629	0	two.sided	FALSE	TRUE	0.017478	0.590623	NBPF1
CROCC	1244	11006	12250	6.7558e+06	0.0661545	0	two.sided	FALSE	TRUE	0.173343	-0.349105	CROCC
BX284668.5	1244	11006	12250	6.84855e+06	0.919471	0	two.sided	FALSE	TRUE	0.960881	0.090416	BX284668.5
BX284668.6	1244	11006	12250	7.05718e+06	2.41869e-15	0	two.sided	FALSE	TRUE	8.165e-14	1.72453	BX284668.6
ATP13A2	1244	11006	12250	6.708e+06	0.00457323	0	two.sided	FALSE	TRUE	0.0212011	-0.580444	ATP13A2
SDHB	1244	11006	12250	6915256	0.389108	0	two.sided	FALSE	TRUE	0.583536	0.0944281	SDHB
RCC2	1244	11006	12250	6.93186e+06	0.100868	0	two.sided	FALSE	TRUE	0.234057	0.242111	RCC2
IFFO2	1244	11006	12250	7.08584e+06	0.000128916	0	two.sided	FALSE	TRUE	0.000965539	0.500753	IFFO2
UBR4	1244	11006	12250	7.03393e+06	0.0151472	0	two.sided	FALSE	TRUE	0.0565591	0.196935	UBR4
AL035413.1	1244	11006	12250	6842234	0.7777	0	two.sided	FALSE	TRUE	0.880597	-0.28098	AL035413.1
EMC1	1244	11006	12250	6688048	0.000388159	0	two.sided	FALSE	TRUE	0.00254935	-0.892732	EMC1
MRTO4	1244	11006	12250	6755483	0.0440655	0	two.sided	FALSE	TRUE	0.129141	-0.405355	MRTO4
AKR7A2	1244	11006	12250	6.44172e+06	2.3553e-08	0	two.sided	FALSE	TRUE	3.58371e-07	-0.729892	AKR7A2
PQLC2	1244	11006	12250	6802142	0.0444589	0	two.sided	FALSE	TRUE	0.129866	-1.08512	PQLC2
CAPZB	1244	11006	12250	5.62213e+06	1.17073e-26	0	two.sided	FALSE	TRUE	7.53104e-25	-0.385568	CAPZB
MINOS1	1244	11006	12250	6825692	0.780277	0	two.sided	FALSE	TRUE	0.882063	-0.0574374	MINOS1
NBL1	1244	11006	12250	6.87687e+06	0.0559474	0	two.sided	FALSE	TRUE	0.153438	0.842558	NBL1
TMCO4	1244	11006	12250	6838561	0.86819	0	two.sided	FALSE	TRUE	0.931847	-0.0589761	TMCO4
OTUD3	1244	11006	12250	6.89306e+06	0.217208	0	two.sided	FALSE	TRUE	0.400678	0.25939	OTUD3
UBXN10-AS1	1244	11006	12250	6.82093e+06	0.358631	0	two.sided	FALSE	TRUE	0.555233	-0.362001	UBXN10-AS1
UBXN10	1244	11006	12250	6838933	0.659612	0	two.sided	FALSE	TRUE	0.805065	-0.300735	UBXN10
CAMK2N1	1244	11006	12250	6787502	0.372857	0	two.sided	FALSE	TRUE	0.567694	-0.0998062	CAMK2N1
MUL1	1244	11006	12250	6842487	0.950847	0	two.sided	FALSE	TRUE	0.977149	-0.0156464	MUL1
PINK1	1244	11006	12250	6.72672e+06	0.0167769	0	two.sided	FALSE	TRUE	0.0615137	-0.462664	PINK1
PINK1-AS	1244	11006	12250	6.84525e+06	0.970856	0	two.sided	FALSE	TRUE	0.985477	-0.0418464	PINK1-AS
DDOST	1244	11006	12250	5.71945e+06	1.44984e-25	0	two.sided	FALSE	TRUE	8.78202e-24	-0.597992	DDOST
HP1BP3	1244	11006	12250	6.51348e+06	0.00266499	0	two.sided	FALSE	TRUE	0.0134223	-0.140148	HP1BP3
EIF4G3	1244	11006	12250	6.78125e+06	0.395307	0	two.sided	FALSE	TRUE	0.588639	-0.120799	EIF4G3
ECE1	1244	11006	12250	6.81861e+06	0.569317	0	two.sided	FALSE	TRUE	0.738106	-0.0928627	ECE1
NBPF3	1244	11006	12250	6832783	0.717045	0	two.sided	FALSE	TRUE	0.841649	-0.102757	NBPF3
USP48	1244	11006	12250	6.87476e+06	0.695485	0	two.sided	FALSE	TRUE	0.82961	0.022088	USP48
CDC42	1244	11006	12250	6643287	0.0790141	0	two.sided	FALSE	TRUE	0.19722	-0.0518357	CDC42
ZBTB40	1244	11006	12250	6.88487e+06	0.408705	0	two.sided	FALSE	TRUE	0.600616	0.13069	ZBTB40
KDM1A	1244	11006	12250	6.82914e+06	0.791549	0	two.sided	FALSE	TRUE	0.88954	-0.0465863	KDM1A
LUZP1	1244	11006	12250	6830315	0.78322	0	two.sided	FALSE	TRUE	0.883624	-0.0606915	LUZP1
HNRNPR	1244	11006	12250	6.92445e+06	0.45394	0	two.sided	FALSE	TRUE	0.639359	0.0410513	HNRNPR
ZNF436	1244	11006	12250	6.83138e+06	0.416913	0	two.sided	FALSE	TRUE	0.608143	-0.456697	ZNF436
RPL11	1244	11006	12250	5829236	7.36077e-18	0	two.sided	FALSE	TRUE	2.94915e-16	-0.0463251	RPL11
ELOA	1244	11006	12250	6870470	0.678973	0	two.sided	FALSE	TRUE	0.818769	0.0503044	ELOA
ELOA-AS1	1244	11006	12250	6886670	0.00891483	0	two.sided	FALSE	TRUE	0.0366435	1.01845	ELOA-AS1
PITHD1	1244	11006	12250	6.78788e+06	0.503837	0	two.sided	FALSE	TRUE	0.682724	-0.0587267	PITHD1
LYPLA2	1244	11006	12250	6580288	0.000432338	0	two.sided	FALSE	TRUE	0.00280137	-0.400369	LYPLA2
GALE	1244	11006	12250	6832613	0.635497	0	two.sided	FALSE	TRUE	0.788104	-0.127466	GALE
HMGCL	1244	11006	12250	6837633	0.816789	0	two.sided	FALSE	TRUE	0.904763	-0.0237006	HMGCL
FUCA1	1244	11006	12250	6742239	0.00138427	0	two.sided	FALSE	TRUE	0.00771868	-1.18465	FUCA1
PNRC2	1244	11006	12250	7413837	1.27804e-08	0	two.sided	FALSE	TRUE	2.02163e-07	0.325828	PNRC2
SRSF10	1244	11006	12250	7633147	7.66556e-15	0	two.sided	FALSE	TRUE	2.46554e-13	0.416921	SRSF10
IFNLR1	1244	11006	12250	6872387	0.385428	0	two.sided	FALSE	TRUE	0.579293	0.21487	IFNLR1
STPG1	1244	11006	12250	6838689	0.702311	0	two.sided	FALSE	TRUE	0.832273	-0.127071	STPG1
NIPAL3	1244	11006	12250	6760784	0.102054	0	two.sided	FALSE	TRUE	0.236147	-0.258971	NIPAL3
RCAN3	1244	11006	12250	6847190	0.953463	0	two.sided	FALSE	TRUE	0.977966	0.0898308	RCAN3
SRRM1	1244	11006	12250	6.71581e+06	0.254215	0	two.sided	FALSE	TRUE	0.443908	-0.0358559	SRRM1
RUNX3	1244	11006	12250	7183725	0.00146086	0	two.sided	FALSE	TRUE	0.00809346	0.156766	RUNX3
SYF2	1244	11006	12250	6.92346e+06	0.469407	0	two.sided	FALSE	TRUE	0.65361	0.0350781	SYF2
RSRP1	1244	11006	12250	6611860	0.03759	0	two.sided	FALSE	TRUE	0.11439	-0.0884548	RSRP1
TMEM50A	1244	11006	12250	6895416	0.647205	0	two.sided	FALSE	TRUE	0.796132	0.0188776	TMEM50A
MACO1	1244	11006	12250	6.98491e+06	0.0220376	0	two.sided	FALSE	TRUE	0.0760803	0.285479	MACO1
LDLRAP1	1244	11006	12250	6741249	0.0258683	0	two.sided	FALSE	TRUE	0.0858743	-0.449689	LDLRAP1
SELENON	1244	11006	12250	6.80935e+06	0.18671	0	two.sided	FALSE	TRUE	0.361659	-0.444828	SELENON
MTFR1L	1244	11006	12250	6.79635e+06	0.240983	0	two.sided	FALSE	TRUE	0.428755	-0.259746	MTFR1L
STMN1	1244	11006	12250	6.63211e+06	0.00125661	0	two.sided	FALSE	TRUE	0.00711856	-0.347066	STMN1
PAFAH2	1244	11006	12250	6.9078e+06	0.208164	0	two.sided	FALSE	TRUE	0.39021	0.194669	PAFAH2
PDIK1L	1244	11006	12250	6.77067e+06	0.0173429	0	two.sided	FALSE	TRUE	0.0630918	-0.796954	PDIK1L
ZNF593	1244	11006	12250	6.98107e+06	0.0137655	0	two.sided	FALSE	TRUE	0.0521226	0.348885	ZNF593
CEP85	1244	11006	12250	6.90212e+06	0.0715432	0	two.sided	FALSE	TRUE	0.183071	0.39507	CEP85
SH3BGRL3	1244	11006	12250	3.88585e+06	1.09506e-138	0	two.sided	FALSE	TRUE	6.6735e-136	-0.228902	SH3BGRL3
UBXN11	1244	11006	12250	6.79303e+06	0.376458	0	two.sided	FALSE	TRUE	0.570551	-0.0908455	UBXN11
CD52	1244	11006	12250	5241591	4.00094e-42	0	two.sided	FALSE	TRUE	4.58682e-40	-0.169126	CD52
CRYBG2	1244	11006	12250	6.86314e+06	0.344871	0	two.sided	FALSE	TRUE	0.541974	0.368116	CRYBG2
ZNF683	1244	11006	12250	6329115	5.39458e-07	0	two.sided	FALSE	TRUE	6.72184e-06	-0.333517	ZNF683
DHDDS	1244	11006	12250	6875647	0.453332	0	two.sided	FALSE	TRUE	0.638969	0.166432	DHDDS
HMGN2	1244	11006	12250	6650799	0.0840207	0	two.sided	FALSE	TRUE	0.206118	-0.0684524	HMGN2
RPS6KA1	1244	11006	12250	6251636	2.3778e-11	0	two.sided	FALSE	TRUE	5.35653e-10	-0.613801	RPS6KA1
ARID1A	1244	11006	12250	7014312	0.0479042	0	two.sided	FALSE	TRUE	0.136857	0.151771	ARID1A
PIGV	1244	11006	12250	6.86921e+06	0.325706	0	two.sided	FALSE	TRUE	0.523725	0.308151	PIGV
ZDHHC18	1244	11006	12250	6953532	0.119789	0	two.sided	FALSE	TRUE	0.264347	0.180111	ZDHHC18
GPN2	1244	11006	12250	6.84203e+06	0.935602	0	two.sided	FALSE	TRUE	0.968732	0.00798304	GPN2
GPATCH3	1244	11006	12250	6819907	0.641936	0	two.sided	FALSE	TRUE	0.792513	-0.0492662	GPATCH3
NUDC	1244	11006	12250	6.69778e+06	0.10871	0	two.sided	FALSE	TRUE	0.24687	-0.120662	NUDC
SLC9A1	1244	11006	12250	7001911	1.08775e-05	0	two.sided	FALSE	TRUE	0.000104177	0.894843	SLC9A1
WDTC1	1244	11006	12250	6.8022e+06	0.521069	0	two.sided	FALSE	TRUE	0.696704	-0.0905569	WDTC1
TMEM222	1244	11006	12250	6896764	0.434814	0	two.sided	FALSE	TRUE	0.623812	0.0589002	TMEM222
SYTL1	1244	11006	12250	6.28185e+06	1.2623e-07	0	two.sided	FALSE	TRUE	1.73178e-06	-0.304065	SYTL1
MAP3K6	1244	11006	12250	6.88583e+06	0.320996	0	two.sided	FALSE	TRUE	0.517661	0.200647	MAP3K6
WASF2	1244	11006	12250	6706708	0.196504	0	two.sided	FALSE	TRUE	0.374909	-0.0623294	WASF2
AHDC1	1244	11006	12250	6.79646e+06	0.197482	0	two.sided	FALSE	TRUE	0.376154	-0.349544	AHDC1
FGR	1244	11006	12250	6460605	1.47068e-05	0	two.sided	FALSE	TRUE	0.000137441	-0.362258	FGR
IFI6	1244	11006	12250	6804977	0.636709	0	two.sided	FALSE	TRUE	0.789173	-0.00626433	IFI6
FAM76A	1244	11006	12250	6769028	0.150962	0	two.sided	FALSE	TRUE	0.311822	-0.272064	FAM76A
STX12	1244	11006	12250	7.06521e+06	0.000996845	0	two.sided	FALSE	TRUE	0.00582364	0.33395	STX12
PPP1R8	1244	11006	12250	6.85892e+06	0.768942	0	two.sided	FALSE	TRUE	0.875313	0.0818929	PPP1R8
THEMIS2	1244	11006	12250	6769947	0.384349	0	two.sided	FALSE	TRUE	0.578271	-0.038503	THEMIS2
RPA2	1244	11006	12250	6.66404e+06	0.0276572	0	two.sided	FALSE	TRUE	0.0902855	-0.212206	RPA2
XKR8	1244	11006	12250	6634583	2.7282e-05	0	two.sided	FALSE	TRUE	0.000237875	-0.913959	XKR8
EYA3	1244	11006	12250	6871653	0.496852	0	two.sided	FALSE	TRUE	0.677866	0.152999	EYA3
DNAJC8	1244	11006	12250	6.61407e+06	0.0212005	0	two.sided	FALSE	TRUE	0.0736956	-0.149744	DNAJC8
ATP5IF1	1244	11006	12250	6348163	6.89879e-06	0	two.sided	FALSE	TRUE	6.85087e-05	-0.204736	ATP5IF1
AL353622.1	1244	11006	12250	6834183	0.562027	0	two.sided	FALSE	TRUE	0.731286	-0.308241	AL353622.1
SESN2	1244	11006	12250	6753694	0.0864525	0	two.sided	FALSE	TRUE	0.2107	-0.234876	SESN2
MED18	1244	11006	12250	6827068	0.419242	0	two.sided	FALSE	TRUE	0.610463	-0.341638	MED18
PHACTR4	1244	11006	12250	6864048	0.786477	0	two.sided	FALSE	TRUE	0.885857	0.0137238	PHACTR4
RCC1	1244	11006	12250	6819315	0.658	0	two.sided	FALSE	TRUE	0.804284	-0.0497447	RCC1
TRNAU1AP	1244	11006	12250	6.8654e+06	0.759037	0	two.sided	FALSE	TRUE	0.869413	0.036159	TRNAU1AP
SNHG12	1244	11006	12250	7489645	2.28464e-20	0	two.sided	FALSE	TRUE	1.09767e-18	0.857648	SNHG12
TAF12	1244	11006	12250	6748794	0.135627	0	two.sided	FALSE	TRUE	0.288046	-0.171735	TAF12
LINC01715	1244	11006	12250	6889297	0.00194105	0	two.sided	FALSE	TRUE	0.0103335	1.36822	LINC01715
GMEB1	1244	11006	12250	6810717	0.493439	0	two.sided	FALSE	TRUE	0.674322	-0.0648018	GMEB1
YTHDF2	1244	11006	12250	6.71123e+06	0.132057	0	two.sided	FALSE	TRUE	0.28295	-0.120029	YTHDF2
EPB41	1244	11006	12250	6716303	0.207643	0	two.sided	FALSE	TRUE	0.389866	-0.0805131	EPB41
SRSF4	1244	11006	12250	7.09309e+06	0.0102526	0	two.sided	FALSE	TRUE	0.0409081	0.163267	SRSF4
MECR	1244	11006	12250	6755286	0.00384465	0	two.sided	FALSE	TRUE	0.0183274	-1.09194	MECR
MATN1-AS1	1244	11006	12250	6.89983e+06	0.0235192	0	two.sided	FALSE	TRUE	0.0799088	0.665721	MATN1-AS1
LAPTM5	1244	11006	12250	6320886	6.83571e-06	0	two.sided	FALSE	TRUE	6.79989e-05	-0.0907932	LAPTM5
PUM1	1244	11006	12250	7018517	0.0371031	0	two.sided	FALSE	TRUE	0.113355	0.181088	PUM1
SNRNP40	1244	11006	12250	6.85578e+06	0.892544	0	two.sided	FALSE	TRUE	0.945023	0.0308401	SNRNP40
ZCCHC17	1244	11006	12250	6747210	0.138424	0	two.sided	FALSE	TRUE	0.29259	-0.201276	ZCCHC17
PEF1	1244	11006	12250	6817397	0.682748	0	two.sided	FALSE	TRUE	0.820928	-0.0683734	PEF1
ADGRB2	1244	11006	12250	6843484	0.852779	0	two.sided	FALSE	TRUE	0.924215	-0.155067	ADGRB2
PTP4A2	1244	11006	12250	6269125	6.28664e-07	0	two.sided	FALSE	TRUE	7.7357e-06	-0.122637	PTP4A2
KHDRBS1	1244	11006	12250	6744059	0.352452	0	two.sided	FALSE	TRUE	0.54897	-0.0521025	KHDRBS1
TMEM39B	1244	11006	12250	6789462	0.0787606	0	two.sided	FALSE	TRUE	0.196726	-0.568132	TMEM39B
KPNA6	1244	11006	12250	6958439	0.061023	0	two.sided	FALSE	TRUE	0.163941	0.23623	KPNA6
TXLNA	1244	11006	12250	6.83595e+06	0.840437	0	two.sided	FALSE	TRUE	0.917366	-0.0481762	TXLNA
CCDC28B	1244	11006	12250	6831053	0.725793	0	two.sided	FALSE	TRUE	0.848052	-0.0979817	CCDC28B
TMEM234	1244	11006	12250	6847974	0.949659	0	two.sided	FALSE	TRUE	0.976563	-0.0171537	TMEM234
EIF3I	1244	11006	12250	6.80179e+06	0.657997	0	two.sided	FALSE	TRUE	0.804284	-0.0303389	EIF3I
FAM167B	1244	11006	12250	6891660	0.00186421	0	two.sided	FALSE	TRUE	0.00997032	1.24965	FAM167B
LCK	1244	11006	12250	5.90536e+06	7.29027e-17	0	two.sided	FALSE	TRUE	2.73912e-15	-0.34986	LCK
HDAC1	1244	11006	12250	6102420	5.48702e-16	0	two.sided	FALSE	TRUE	1.95288e-14	-0.735518	HDAC1
MARCKSL1	1244	11006	12250	6678156	0.0150871	0	two.sided	FALSE	TRUE	0.0563891	-0.280515	MARCKSL1
FAM229A	1244	11006	12250	6870950	0.205465	0	two.sided	FALSE	TRUE	0.387408	0.472406	FAM229A
BSDC1	1244	11006	12250	7180274	8.07871e-06	0	two.sided	FALSE	TRUE	7.93413e-05	0.422261	BSDC1
ZBTB8OS	1244	11006	12250	6.68358e+06	0.0390342	0	two.sided	FALSE	TRUE	0.117886	-0.209593	ZBTB8OS
RBBP4	1244	11006	12250	6.57105e+06	0.00523375	0	two.sided	FALSE	TRUE	0.0236356	-0.202086	RBBP4
SYNC	1244	11006	12250	6856636	0.616414	0	two.sided	FALSE	TRUE	0.77344	0.175394	SYNC
YARS	1244	11006	12250	7.29946e+06	3.1032e-08	0	two.sided	FALSE	TRUE	4.62444e-07	0.470071	YARS
S100PBP	1244	11006	12250	6.99663e+06	0.00374031	0	two.sided	FALSE	TRUE	0.0179185	0.420394	S100PBP
RNF19B	1244	11006	12250	6817055	0.555707	0	two.sided	FALSE	TRUE	0.726303	-0.0934653	RNF19B
AK2	1244	11006	12250	6724215	0.0618222	0	two.sided	FALSE	TRUE	0.165597	-0.25624	AK2
AZIN2	1244	11006	12250	6821141	0.255194	0	two.sided	FALSE	TRUE	0.445014	-0.531462	AZIN2
TRIM62	1244	11006	12250	6851858	0.80725	0	two.sided	FALSE	TRUE	0.898204	0.0529651	TRIM62
ZNF362	1244	11006	12250	6.89045e+06	0.407663	0	two.sided	FALSE	TRUE	0.599941	0.101632	ZNF362
PHC2	1244	11006	12250	6.82078e+06	0.711676	0	two.sided	FALSE	TRUE	0.838045	-0.0382953	PHC2
SMIM12	1244	11006	12250	6.80099e+06	0.501083	0	two.sided	FALSE	TRUE	0.681071	-0.0588247	SMIM12
DLGAP3	1244	11006	12250	6823919	0.245647	0	two.sided	FALSE	TRUE	0.43445	-0.634228	DLGAP3
AC114490.3	1244	11006	12250	6850828	0.831072	0	two.sided	FALSE	TRUE	0.913289	0.0540191	AC114490.3
AC114490.2	1244	11006	12250	6836117	0.437701	0	two.sided	FALSE	TRUE	0.626284	-0.631835	AC114490.2
TMEM35B	1244	11006	12250	6625117	2.13196e-05	0	two.sided	FALSE	TRUE	0.000191213	-0.899371	TMEM35B
ZMYM6	1244	11006	12250	6849082	0.914322	0	two.sided	FALSE	TRUE	0.957401	0.0253657	ZMYM6
ZMYM1	1244	11006	12250	6792839	0.121572	0	two.sided	FALSE	TRUE	0.267365	-0.427355	ZMYM1
SFPQ	1244	11006	12250	7.76721e+06	1.65256e-16	0	two.sided	FALSE	TRUE	6.11341e-15	0.314895	SFPQ
ZMYM4	1244	11006	12250	6.81699e+06	0.52491	0	two.sided	FALSE	TRUE	0.700223	-0.0763117	ZMYM4
ZMYM4-AS1	1244	11006	12250	6891667	0.00186122	0	two.sided	FALSE	TRUE	0.0099589	1.26574	ZMYM4-AS1
KIAA0319L	1244	11006	12250	6.90495e+06	0.303152	0	two.sided	FALSE	TRUE	0.500028	0.136295	KIAA0319L
NCDN	1244	11006	12250	6825744	0.471125	0	two.sided	FALSE	TRUE	0.654686	-0.258129	NCDN
AC004865.2	1244	11006	12250	6472428	7.26112e-08	0	two.sided	FALSE	TRUE	1.03288e-06	-0.733386	AC004865.2
PSMB2	1244	11006	12250	6619960	0.00952716	0	two.sided	FALSE	TRUE	0.0385044	-0.227599	PSMB2
C1orf216	1244	11006	12250	6738274	0.00619198	0	two.sided	FALSE	TRUE	0.0271066	-0.735858	C1orf216
CLSPN	1244	11006	12250	6.86465e+06	0.245409	0	two.sided	FALSE	TRUE	0.434261	0.619843	CLSPN
AGO4	1244	11006	12250	6.80664e+06	0.460682	0	two.sided	FALSE	TRUE	0.645815	-0.0689653	AGO4
AGO1	1244	11006	12250	6.91159e+06	0.109067	0	two.sided	FALSE	TRUE	0.247334	0.316718	AGO1
AGO3	1244	11006	12250	6851253	0.935059	0	two.sided	FALSE	TRUE	0.968574	0.0110184	AGO3
ADPRHL2	1244	11006	12250	6732156	0.0249566	0	two.sided	FALSE	TRUE	0.0837359	-0.427515	ADPRHL2
TRAPPC3	1244	11006	12250	6735733	0.132543	0	two.sided	FALSE	TRUE	0.283733	-0.179835	TRAPPC3
MAP7D1	1244	11006	12250	6.92451e+06	0.40003	0	two.sided	FALSE	TRUE	0.592775	0.056695	MAP7D1
THRAP3	1244	11006	12250	6907915	0.544096	0	two.sided	FALSE	TRUE	0.715512	0.0377503	THRAP3
EVA1B	1244	11006	12250	6798225	0.16494	0	two.sided	FALSE	TRUE	0.332147	-0.399915	EVA1B
STK40	1244	11006	12250	6764760	0.134962	0	two.sided	FALSE	TRUE	0.287055	-0.253987	STK40
LSM10	1244	11006	12250	6793426	0.499927	0	two.sided	FALSE	TRUE	0.680089	-0.0794173	LSM10
MRPS15	1244	11006	12250	6783932	0.470805	0	two.sided	FALSE	TRUE	0.654647	-0.0663258	MRPS15
LINC01137	1244	11006	12250	6784825	0.0081873	0	two.sided	FALSE	TRUE	0.0341255	-1.4863	LINC01137
ZC3H12A	1244	11006	12250	7.15022e+06	6.01314e-06	0	two.sided	FALSE	TRUE	6.03869e-05	0.518987	ZC3H12A
MEAF6	1244	11006	12250	6530507	0.00112668	0	two.sided	FALSE	TRUE	0.00649047	-0.23372	MEAF6
SNIP1	1244	11006	12250	7.1274e+06	7.46847e-05	0	two.sided	FALSE	TRUE	0.000591906	0.405065	SNIP1
GNL2	1244	11006	12250	6858101	0.834261	0	two.sided	FALSE	TRUE	0.914071	0.0304922	GNL2
C1orf109	1244	11006	12250	6.84769e+06	0.954366	0	two.sided	FALSE	TRUE	0.978182	-0.0231763	C1orf109
CDCA8	1244	11006	12250	6892015	0.00921817	0	two.sided	FALSE	TRUE	0.03761	0.975528	CDCA8
MANEAL	1244	11006	12250	6795079	0.06781	0	two.sided	FALSE	TRUE	0.176162	-0.729076	MANEAL
YRDC	1244	11006	12250	6644340	0.00302134	0	two.sided	FALSE	TRUE	0.014925	-0.403975	YRDC
C1orf122	1244	11006	12250	6.69786e+06	0.067289	0	two.sided	FALSE	TRUE	0.175245	-0.179257	C1orf122
MTF1	1244	11006	12250	6.85676e+06	0.827225	0	two.sided	FALSE	TRUE	0.911364	0.00960791	MTF1
INPP5B	1244	11006	12250	6.852e+06	0.869857	0	two.sided	FALSE	TRUE	0.932427	0.0357715	INPP5B
SF3A3	1244	11006	12250	6712312	0.0806427	0	two.sided	FALSE	TRUE	0.199886	-0.172438	SF3A3
FHL3	1244	11006	12250	6794171	0.193524	0	two.sided	FALSE	TRUE	0.370833	-0.237289	FHL3
UTP11	1244	11006	12250	6799052	0.261695	0	two.sided	FALSE	TRUE	0.45321	-0.225147	UTP11
RRAGC	1244	11006	12250	6743343	0.0652399	0	two.sided	FALSE	TRUE	0.171954	-0.329901	RRAGC
AL139260.1	1244	11006	12250	6838936	0.754043	0	two.sided	FALSE	TRUE	0.866779	-0.0934598	AL139260.1
MYCBP	1244	11006	12250	6.8092e+06	0.134953	0	two.sided	FALSE	TRUE	0.287055	-0.575968	MYCBP
AKIRIN1	1244	11006	12250	6.88673e+06	0.587471	0	two.sided	FALSE	TRUE	0.752448	0.0565837	AKIRIN1
NDUFS5	1244	11006	12250	6893924	0.659467	0	two.sided	FALSE	TRUE	0.805065	0.0115967	NDUFS5
MACF1	1244	11006	12250	6778723	0.531828	0	two.sided	FALSE	TRUE	0.705388	-0.0418429	MACF1
PABPC4	1244	11006	12250	6893259	0.476568	0	two.sided	FALSE	TRUE	0.65926	0.0845474	PABPC4
HPCAL4	1244	11006	12250	6852004	0.627526	0	two.sided	FALSE	TRUE	0.7808	0.294137	HPCAL4
PPIE	1244	11006	12250	6.79549e+06	0.450341	0	two.sided	FALSE	TRUE	0.637164	-0.0952959	PPIE
BMP8B	1244	11006	12250	6.8677e+06	0.163461	0	two.sided	FALSE	TRUE	0.330173	0.624122	BMP8B
AL033527.3	1244	11006	12250	6822623	0.067949	0	two.sided	FALSE	TRUE	0.176211	-2.18915	AL033527.3
TRIT1	1244	11006	12250	6828464	0.56145	0	two.sided	FALSE	TRUE	0.730699	-0.192823	TRIT1
CAP1	1244	11006	12250	6.08514e+06	2.08487e-11	0	two.sided	FALSE	TRUE	4.74277e-10	-0.269975	CAP1
PPT1	1244	11006	12250	6642598	0.00474476	0	two.sided	FALSE	TRUE	0.0218883	-0.334031	PPT1
RLF	1244	11006	12250	7194275	5.5388e-06	0	two.sided	FALSE	TRUE	5.64061e-05	0.408958	RLF
AL050341.2	1244	11006	12250	6.8926e+06	0.038037	0	two.sided	FALSE	TRUE	0.115417	0.61734	AL050341.2
ZMPSTE24	1244	11006	12250	6.76929e+06	0.178123	0	two.sided	FALSE	TRUE	0.350524	-0.219611	ZMPSTE24
SMAP2	1244	11006	12250	6.88566e+06	0.685254	0	two.sided	FALSE	TRUE	0.822746	0.0307693	SMAP2
ZFP69B	1244	11006	12250	6.83674e+06	0.462847	0	two.sided	FALSE	TRUE	0.647493	-0.618032	ZFP69B
ZFP69	1244	11006	12250	6.83843e+06	0.772309	0	two.sided	FALSE	TRUE	0.877143	-0.0993767	ZFP69
EXO5	1244	11006	12250	6.82384e+06	0.378231	0	two.sided	FALSE	TRUE	0.572154	-0.296908	EXO5
ZNF684	1244	11006	12250	6843457	0.944398	0	two.sided	FALSE	TRUE	0.974008	0.00587226	ZNF684
NFYC-AS1	1244	11006	12250	6955585	7.36172e-06	0	two.sided	FALSE	TRUE	7.27936e-05	1.17504	NFYC-AS1
NFYC	1244	11006	12250	6.77463e+06	0.260605	0	two.sided	FALSE	TRUE	0.451729	-0.151673	NFYC
CITED4	1244	11006	12250	6.76207e+06	0.0185971	0	two.sided	FALSE	TRUE	0.066626	-0.649222	CITED4
CTPS1	1244	11006	12250	6794811	0.369957	0	two.sided	FALSE	TRUE	0.565226	-0.133748	CTPS1
SCMH1	1244	11006	12250	6.84341e+06	0.940471	0	two.sided	FALSE	TRUE	0.971255	-0.0603799	SCMH1
HIVEP3	1244	11006	12250	6.68391e+06	0.0128334	0	two.sided	FALSE	TRUE	0.0491233	-0.339665	HIVEP3
FOXJ3	1244	11006	12250	7114959	0.00029389	0	two.sided	FALSE	TRUE	0.00200174	0.345187	FOXJ3
PPCS	1244	11006	12250	6.66385e+06	0.0233934	0	two.sided	FALSE	TRUE	0.0796584	-0.236798	PPCS
CCDC30	1244	11006	12250	6854829	0.56646	0	two.sided	FALSE	TRUE	0.73544	0.286456	CCDC30
PPIH	1244	11006	12250	6674704	0.0371354	0	two.sided	FALSE	TRUE	0.113394	-0.183388	PPIH
YBX1	1244	11006	12250	6561833	0.014872	0	two.sided	FALSE	TRUE	0.0556752	-0.0521844	YBX1
P3H1	1244	11006	12250	6873396	0.551072	0	two.sided	FALSE	TRUE	0.722716	0.111551	P3H1
C1orf50	1244	11006	12250	6842053	0.910466	0	two.sided	FALSE	TRUE	0.955364	-0.0361243	C1orf50
AC098484.3	1244	11006	12250	6.82696e+06	0.640913	0	two.sided	FALSE	TRUE	0.791672	-0.102061	AC098484.3
SVBP	1244	11006	12250	6.75607e+06	0.181345	0	two.sided	FALSE	TRUE	0.354649	-0.149525	SVBP
ERMAP	1244	11006	12250	6888070	0.0350361	0	two.sided	FALSE	TRUE	0.108442	0.723619	ERMAP
ZNF691	1244	11006	12250	6847260	0.932584	0	two.sided	FALSE	TRUE	0.967892	0.0210213	ZNF691
SLC2A1	1244	11006	12250	6805118	0.481221	0	two.sided	FALSE	TRUE	0.663657	-0.0732119	SLC2A1
SLC2A1-AS1	1244	11006	12250	6859373	0.281272	0	two.sided	FALSE	TRUE	0.475662	0.61102	SLC2A1-AS1
EBNA1BP2	1244	11006	12250	6571226	3.06696e-06	0	two.sided	FALSE	TRUE	3.29123e-05	-0.797151	EBNA1BP2
ELOVL1	1244	11006	12250	6528504	3.5531e-05	0	two.sided	FALSE	TRUE	0.000300521	-0.461851	ELOVL1
MED8	1244	11006	12250	6928484	0.106323	0	two.sided	FALSE	TRUE	0.242776	0.237804	MED8
SZT2	1244	11006	12250	6846106	0.99331	0	two.sided	FALSE	TRUE	0.997439	0.00153718	SZT2
HYI	1244	11006	12250	6837771	0.803902	0	two.sided	FALSE	TRUE	0.896502	-0.0933438	HYI
KDM4A	1244	11006	12250	6.84677e+06	0.962673	0	two.sided	FALSE	TRUE	0.982518	-0.000492832	KDM4A
ST3GAL3	1244	11006	12250	6825988	0.509837	0	two.sided	FALSE	TRUE	0.687481	-0.215246	ST3GAL3
IPO13	1244	11006	12250	6790877	0.0905745	0	two.sided	FALSE	TRUE	0.217837	-0.469417	IPO13
DPH2	1244	11006	12250	6760036	0.0234352	0	two.sided	FALSE	TRUE	0.0797167	-0.616173	DPH2
ATP6V0B	1244	11006	12250	6507250	0.000711492	0	two.sided	FALSE	TRUE	0.00436123	-0.214057	ATP6V0B
B4GALT2	1244	11006	12250	6839107	0.7869	0	two.sided	FALSE	TRUE	0.886248	-0.117844	B4GALT2
CCDC24	1244	11006	12250	6.86502e+06	0.288013	0	two.sided	FALSE	TRUE	0.48269	0.436292	CCDC24
DMAP1	1244	11006	12250	6.77311e+06	0.254136	0	two.sided	FALSE	TRUE	0.443854	-0.150353	DMAP1
ERI3	1244	11006	12250	6.68902e+06	0.0102026	0	two.sided	FALSE	TRUE	0.0407507	-0.389191	ERI3
RNF220	1244	11006	12250	6.66987e+06	0.060168	0	two.sided	FALSE	TRUE	0.162381	-0.157256	RNF220
TMEM53	1244	11006	12250	6817576	0.169578	0	two.sided	FALSE	TRUE	0.338411	-0.754652	TMEM53
ARMH1	1244	11006	12250	6.83995e+06	0.83392	0	two.sided	FALSE	TRUE	0.913958	-0.0362988	ARMH1
RPS8	1244	11006	12250	5844753	2.30037e-17	0	two.sided	FALSE	TRUE	8.98875e-16	-0.0511178	RPS8
PLK3	1244	11006	12250	7.3052e+06	1.27643e-24	0	two.sided	FALSE	TRUE	7.46451e-23	1.47606	PLK3
EIF2B3	1244	11006	12250	6.80196e+06	0.360714	0	two.sided	FALSE	TRUE	0.557266	-0.153777	EIF2B3
HECTD3	1244	11006	12250	6892147	0.373267	0	two.sided	FALSE	TRUE	0.567944	0.15612	HECTD3
UROD	1244	11006	12250	6.77352e+06	0.229652	0	two.sided	FALSE	TRUE	0.415849	-0.200781	UROD
ZSWIM5	1244	11006	12250	6829858	0.522823	0	two.sided	FALSE	TRUE	0.698404	-0.265759	ZSWIM5
MUTYH	1244	11006	12250	6716847	0.0140792	0	two.sided	FALSE	TRUE	0.0531192	-0.448435	MUTYH
TOE1	1244	11006	12250	6.7606e+06	0.0883193	0	two.sided	FALSE	TRUE	0.213943	-0.290595	TOE1
TESK2	1244	11006	12250	6831322	0.596212	0	two.sided	FALSE	TRUE	0.757904	-0.207136	TESK2
CCDC163	1244	11006	12250	6856523	0.631843	0	two.sided	FALSE	TRUE	0.784569	0.150575	CCDC163
PRDX1	1244	11006	12250	6128706	1.81895e-14	0	two.sided	FALSE	TRUE	5.69232e-13	-0.655235	PRDX1
AKR1A1	1244	11006	12250	6.57906e+06	0.00031099	0	two.sided	FALSE	TRUE	0.00210615	-0.42064	AKR1A1
NASP	1244	11006	12250	6863293	0.820374	0	two.sided	FALSE	TRUE	0.907009	0.0167736	NASP
GPBP1L1	1244	11006	12250	6.98443e+06	0.0487822	0	two.sided	FALSE	TRUE	0.138715	0.242737	GPBP1L1
TMEM69	1244	11006	12250	6.95628e+06	0.0024737	0	two.sided	FALSE	TRUE	0.0126403	0.58498	TMEM69
IPP	1244	11006	12250	6.80165e+06	0.319686	0	two.sided	FALSE	TRUE	0.516374	-0.187267	IPP
MAST2	1244	11006	12250	6878904	0.303105	0	two.sided	FALSE	TRUE	0.500021	0.253527	MAST2
PIK3R3	1244	11006	12250	6850262	0.875446	0	two.sided	FALSE	TRUE	0.9353	0.088866	PIK3R3
POMGNT1	1244	11006	12250	6.73434e+06	0.0249319	0	two.sided	FALSE	TRUE	0.0836816	-0.438837	POMGNT1
LRRC41	1244	11006	12250	6.74112e+06	0.0237642	0	two.sided	FALSE	TRUE	0.0804344	-0.438821	LRRC41
UQCRH	1244	11006	12250	6884519	0.722507	0	two.sided	FALSE	TRUE	0.845725	0.0106697	UQCRH
NSUN4	1244	11006	12250	6936711	0.0189376	0	two.sided	FALSE	TRUE	0.0674704	0.514775	NSUN4
MKNK1	1244	11006	12250	6857795	0.843652	0	two.sided	FALSE	TRUE	0.919056	0.0386274	MKNK1
MOB3C	1244	11006	12250	6.82687e+06	0.441431	0	two.sided	FALSE	TRUE	0.62932	-0.308733	MOB3C
ATPAF1	1244	11006	12250	6651436	0.00203093	0	two.sided	FALSE	TRUE	0.0107282	-0.462194	ATPAF1
EFCAB14	1244	11006	12250	6.77382e+06	0.416179	0	two.sided	FALSE	TRUE	0.607769	-0.0934201	EFCAB14
CMPK1	1244	11006	12250	6633311	0.0350554	0	two.sided	FALSE	TRUE	0.108473	-0.150669	CMPK1
FOXD2-AS1	1244	11006	12250	6850155	0.739751	0	two.sided	FALSE	TRUE	0.857467	0.295641	FOXD2-AS1
FOXD2	1244	11006	12250	6.82348e+06	0.190515	0	two.sided	FALSE	TRUE	0.36678	-0.862948	FOXD2
SPATA6	1244	11006	12250	6.86014e+06	0.422667	0	two.sided	FALSE	TRUE	0.612971	0.339226	SPATA6
FAF1	1244	11006	12250	6.65805e+06	0.00838332	0	two.sided	FALSE	TRUE	0.0348798	-0.314566	FAF1
CDKN2C	1244	11006	12250	7005917	1.83526e-05	0	two.sided	FALSE	TRUE	0.00016759	0.841225	CDKN2C
RNF11	1244	11006	12250	6974101	0.080484	0	two.sided	FALSE	TRUE	0.199641	0.168676	RNF11
EPS15	1244	11006	12250	7235039	2.11223e-05	0	two.sided	FALSE	TRUE	0.000189593	0.288271	EPS15
OSBPL9	1244	11006	12250	6841994	0.957233	0	two.sided	FALSE	TRUE	0.979827	0.000895381	OSBPL9
NRDC	1244	11006	12250	6536160	0.000343782	0	two.sided	FALSE	TRUE	0.00229697	-0.319501	NRDC
TXNDC12	1244	11006	12250	6642219	0.00765667	0	two.sided	FALSE	TRUE	0.0323369	-0.292694	TXNDC12
KTI12	1244	11006	12250	6.70993e+06	0.00311522	0	two.sided	FALSE	TRUE	0.0153103	-0.662168	KTI12
BTF3L4	1244	11006	12250	6.86496e+06	0.735261	0	two.sided	FALSE	TRUE	0.854723	0.0357858	BTF3L4
ZFYVE9	1244	11006	12250	6863958	0.26619	0	two.sided	FALSE	TRUE	0.458253	0.483196	ZFYVE9
CC2D1B	1244	11006	12250	6904463	0.20174	0	two.sided	FALSE	TRUE	0.38244	0.19563	CC2D1B
PRPF38A	1244	11006	12250	6816404	0.671085	0	two.sided	FALSE	TRUE	0.81281	-0.0527788	PRPF38A
TUT4	1244	11006	12250	7.33662e+06	3.2608e-08	0	two.sided	FALSE	TRUE	4.84684e-07	0.400657	TUT4
GPX7	1244	11006	12250	6751116	0.00841515	0	two.sided	FALSE	TRUE	0.0349871	-0.716194	GPX7
SHISAL2A	1244	11006	12250	6.85993e+06	0.74353	0	two.sided	FALSE	TRUE	0.859559	0.0353711	SHISAL2A
COA7	1244	11006	12250	6835004	0.552447	0	two.sided	FALSE	TRUE	0.723863	-0.351687	COA7
ZYG11B	1244	11006	12250	6.88059e+06	0.342229	0	two.sided	FALSE	TRUE	0.538919	0.216198	ZYG11B
ECHDC2	1244	11006	12250	6759724	0.188275	0	two.sided	FALSE	TRUE	0.363825	-0.162701	ECHDC2
SCP2	1244	11006	12250	6.14217e+06	2.92479e-12	0	two.sided	FALSE	TRUE	7.3145e-11	-0.484048	SCP2
PODN	1244	11006	12250	6.78821e+06	0.0198999	0	two.sided	FALSE	TRUE	0.0700155	-1.16702	PODN
SLC1A7	1244	11006	12250	6680186	0.00127693	0	two.sided	FALSE	TRUE	0.00721599	-0.620594	SLC1A7
CPT2	1244	11006	12250	6835248	0.702389	0	two.sided	FALSE	TRUE	0.832273	-0.0473926	CPT2
C1orf123	1244	11006	12250	6.755e+06	0.193593	0	two.sided	FALSE	TRUE	0.370883	-0.159024	C1orf123
MAGOH	1244	11006	12250	6734716	0.240862	0	two.sided	FALSE	TRUE	0.428673	-0.0784141	MAGOH
LRP8	1244	11006	12250	6850247	0.889734	0	two.sided	FALSE	TRUE	0.943898	0.0670501	LRP8
NDC1	1244	11006	12250	6.79696e+06	0.0399895	0	two.sided	FALSE	TRUE	0.12018	-1.00077	NDC1
YIPF1	1244	11006	12250	6.85855e+06	0.770067	0	two.sided	FALSE	TRUE	0.875503	0.0561773	YIPF1
HSPB11	1244	11006	12250	6.76936e+06	0.345925	0	two.sided	FALSE	TRUE	0.542819	-0.0862028	HSPB11
LRRC42	1244	11006	12250	6.84639e+06	0.98608	0	two.sided	FALSE	TRUE	0.993318	-0.0110908	LRRC42
TMEM59	1244	11006	12250	6.35537e+06	7.00802e-06	0	two.sided	FALSE	TRUE	6.95337e-05	-0.222236	TMEM59
TCEANC2	1244	11006	12250	6.83765e+06	0.761002	0	two.sided	FALSE	TRUE	0.870543	-0.0898436	TCEANC2
MRPL37	1244	11006	12250	6894017	0.475054	0	two.sided	FALSE	TRUE	0.657815	0.0921083	MRPL37
SSBP3	1244	11006	12250	6197904	2.78271e-10	0	two.sided	FALSE	TRUE	5.50785e-09	-0.418263	SSBP3
TTC4	1244	11006	12250	6824358	0.388285	0	two.sided	FALSE	TRUE	0.582452	-0.357802	TTC4
TTC22	1244	11006	12250	6765762	0.0287621	0	two.sided	FALSE	TRUE	0.0928194	-0.629184	TTC22
LEXM	1244	11006	12250	6791128	0.0618078	0	two.sided	FALSE	TRUE	0.165597	-0.70988	LEXM
DHCR24	1244	11006	12250	6793910	0.036461	0	two.sided	FALSE	TRUE	0.111675	-0.828125	DHCR24
USP24	1244	11006	12250	7.06669e+06	0.00147287	0	two.sided	FALSE	TRUE	0.00815217	0.358269	USP24
MIR4422HG	1244	11006	12250	6.87227e+06	0.0341195	0	two.sided	FALSE	TRUE	0.106145	1.18247	MIR4422HG
OMA1	1244	11006	12250	6803805	0.21459	0	two.sided	FALSE	TRUE	0.398131	-0.361468	OMA1
MYSM1	1244	11006	12250	6992380	0.0190825	0	two.sided	FALSE	TRUE	0.0678909	0.291286	MYSM1
JUN	1244	11006	12250	10173808	3.45794e-181	0	two.sided	FALSE	TRUE	5.71992e-178	1.164	JUN
FGGY	1244	11006	12250	6780923	0.0229496	0	two.sided	FALSE	TRUE	0.0785961	-0.890202	FGGY
NFIA	1244	11006	12250	6850503	0.885085	0	two.sided	FALSE	TRUE	0.940531	0.0378042	NFIA
TM2D1	1244	11006	12250	6.62177e+06	0.000215564	0	two.sided	FALSE	TRUE	0.00152104	-0.6052	TM2D1
PATJ	1244	11006	12250	6884104	0.152644	0	two.sided	FALSE	TRUE	0.314104	0.39826	PATJ
USP1	1244	11006	12250	6804938	0.598102	0	two.sided	FALSE	TRUE	0.759418	-0.04408	USP1
DOCK7	1244	11006	12250	6.89715e+06	0.0198233	0	two.sided	FALSE	TRUE	0.069767	0.806898	DOCK7
ATG4C	1244	11006	12250	6812622	0.252823	0	two.sided	FALSE	TRUE	0.442612	-0.414905	ATG4C
ALG6	1244	11006	12250	6.83826e+06	0.859553	0	two.sided	FALSE	TRUE	0.928084	0.0076867	ALG6
ITGB3BP	1244	11006	12250	6.76505e+06	0.0618494	0	two.sided	FALSE	TRUE	0.165597	-0.442705	ITGB3BP
EFCAB7	1244	11006	12250	6822369	0.440405	0	two.sided	FALSE	TRUE	0.628427	-0.216164	EFCAB7
PGM1	1244	11006	12250	6590617	3.09414e-05	0	two.sided	FALSE	TRUE	0.000266372	-0.675891	PGM1
JAK1	1244	11006	12250	6009897	3.24369e-13	0	two.sided	FALSE	TRUE	8.87913e-12	-0.243483	JAK1
DNAJC6	1244	11006	12250	6843391	0.861755	0	two.sided	FALSE	TRUE	0.92847	-0.113878	DNAJC6
LEPROT	1244	11006	12250	6.84507e+06	0.989941	0	two.sided	FALSE	TRUE	0.99527	0.000344466	LEPROT
LEPR	1244	11006	12250	6841228	0.792241	0	two.sided	FALSE	TRUE	0.889581	-0.168702	LEPR
PDE4B	1244	11006	12250	6.9741e+06	0.0207142	0	two.sided	FALSE	TRUE	0.0724404	0.328691	PDE4B
MIER1	1244	11006	12250	7337133	1.96561e-07	0	two.sided	FALSE	TRUE	2.61306e-06	0.348183	MIER1
SLC35D1	1244	11006	12250	6.82469e+06	0.530966	0	two.sided	FALSE	TRUE	0.70489	-0.179183	SLC35D1
SERBP1	1244	11006	12250	6655994	0.0772988	0	two.sided	FALSE	TRUE	0.194026	-0.0874409	SERBP1
GADD45A	1244	11006	12250	6844795	0.987381	0	two.sided	FALSE	TRUE	0.993992	0.0702514	GADD45A
LRRC40	1244	11006	12250	6893179	0.318537	0	two.sided	FALSE	TRUE	0.515707	0.153297	LRRC40
SRSF11	1244	11006	12250	7.59426e+06	8.95073e-12	0	two.sided	FALSE	TRUE	2.11511e-10	0.292361	SRSF11
ANKRD13C	1244	11006	12250	7.10295e+06	2.25165e-05	0	two.sided	FALSE	TRUE	0.000200398	0.53405	ANKRD13C
HHLA3	1244	11006	12250	6811408	0.1783	0	two.sided	FALSE	TRUE	0.350675	-0.547435	HHLA3
CTH	1244	11006	12250	6853288	0.690359	0	two.sided	FALSE	TRUE	0.825707	0.155306	CTH
ZRANB2	1244	11006	12250	6.80697e+06	0.679891	0	two.sided	FALSE	TRUE	0.81945	-0.0242546	ZRANB2
LRRIQ3	1244	11006	12250	6.84774e+06	0.872503	0	two.sided	FALSE	TRUE	0.933698	0.0859862	LRRIQ3
FPGT	1244	11006	12250	6859796	0.348157	0	two.sided	FALSE	TRUE	0.544919	0.442589	FPGT
CRYZ	1244	11006	12250	6.83401e+06	0.817391	0	two.sided	FALSE	TRUE	0.905181	-0.0484381	CRYZ
TYW3	1244	11006	12250	6.91545e+06	0.176849	0	two.sided	FALSE	TRUE	0.34855	0.234134	TYW3
ACADM	1244	11006	12250	6.80988e+06	0.427683	0	two.sided	FALSE	TRUE	0.618168	-0.14221	ACADM
RABGGTB	1244	11006	12250	7343515	4.21323e-10	0	two.sided	FALSE	TRUE	8.14441e-09	0.524744	RABGGTB
PIGK	1244	11006	12250	6.69438e+06	0.00200031	0	two.sided	FALSE	TRUE	0.0105954	-0.610419	PIGK
AK5	1244	11006	12250	6.78683e+06	0.00761227	0	two.sided	FALSE	TRUE	0.032204	-1.5413	AK5
AC118549.1	1244	11006	12250	6.91603e+06	0.215801	0	two.sided	FALSE	TRUE	0.399576	0.15892	AC118549.1
USP33	1244	11006	12250	6750431	0.241911	0	two.sided	FALSE	TRUE	0.430092	-0.112795	USP33
MIGA1	1244	11006	12250	7120502	1.1238e-06	0	two.sided	FALSE	TRUE	1.31972e-05	0.584294	MIGA1
FUBP1	1244	11006	12250	7149849	0.000445214	0	two.sided	FALSE	TRUE	0.00287354	0.311246	FUBP1
DNAJB4	1244	11006	12250	7.73238e+06	1.22564e-113	0	two.sided	FALSE	TRUE	5.45836e-111	2.86034	DNAJB4
AC103591.3	1244	11006	12250	7051856	7.5906e-06	0	two.sided	FALSE	TRUE	7.4865e-05	0.687537	AC103591.3
IFI44L	1244	11006	12250	6.88386e+06	0.00259624	0	two.sided	FALSE	TRUE	0.0131332	1.32084	IFI44L
IFI44	1244	11006	12250	6.99516e+06	1.72243e-06	0	two.sided	FALSE	TRUE	1.94766e-05	1.0437	IFI44
AL359504.2	1244	11006	12250	6.89288e+06	0.0692761	0	two.sided	FALSE	TRUE	0.178612	0.534001	AL359504.2
PRKACB	1244	11006	12250	7039650	0.031292	0	two.sided	FALSE	TRUE	0.09916	0.166955	PRKACB
RPF1	1244	11006	12250	6735455	0.146616	0	two.sided	FALSE	TRUE	0.30556	-0.168699	RPF1
GNG5	1244	11006	12250	6.36039e+06	5.67002e-06	0	two.sided	FALSE	TRUE	5.74897e-05	-0.227223	GNG5
SPATA1	1244	11006	12250	6.84899e+06	0.790532	0	two.sided	FALSE	TRUE	0.888869	0.154417	SPATA1
CTBS	1244	11006	12250	7114990	2.439e-05	0	two.sided	FALSE	TRUE	0.000215581	0.511626	CTBS
SSX2IP	1244	11006	12250	6845584	0.997276	0	two.sided	FALSE	TRUE	0.998869	0.0166491	SSX2IP
MCOLN2	1244	11006	12250	7.31335e+06	2.40656e-10	0	two.sided	FALSE	TRUE	4.8044e-09	0.558078	MCOLN2
WDR63	1244	11006	12250	6868075	0.229868	0	two.sided	FALSE	TRUE	0.415998	0.534666	WDR63
C1orf52	1244	11006	12250	7100821	0.00085292	0	two.sided	FALSE	TRUE	0.00511443	0.296025	C1orf52
BCL10	1244	11006	12250	6933115	0.194682	0	two.sided	FALSE	TRUE	0.372494	0.170199	BCL10
ZNHIT6	1244	11006	12250	6.83171e+06	0.801482	0	two.sided	FALSE	TRUE	0.895097	-0.0350238	ZNHIT6
ODF2L	1244	11006	12250	6962513	0.13561	0	two.sided	FALSE	TRUE	0.288046	0.126448	ODF2L
AL049597.2	1244	11006	12250	6863442	0.251245	0	two.sided	FALSE	TRUE	0.440582	0.548249	AL049597.2
SH3GLB1	1244	11006	12250	7.2512e+06	1.30741e-05	0	two.sided	FALSE	TRUE	0.000123278	0.308688	SH3GLB1
SELENOF	1244	11006	12250	6261607	5.39543e-09	0	two.sided	FALSE	TRUE	8.98902e-08	-0.411275	SELENOF
HS2ST1	1244	11006	12250	6905380	0.153726	0	two.sided	FALSE	TRUE	0.315882	0.254379	HS2ST1
LMO4	1244	11006	12250	7137635	8.92228e-06	0	two.sided	FALSE	TRUE	8.68891e-05	0.482926	LMO4
PKN2	1244	11006	12250	7214517	8.571e-07	0	two.sided	FALSE	TRUE	1.03057e-05	0.456916	PKN2
GTF2B	1244	11006	12250	7003729	0.0591437	0	two.sided	FALSE	TRUE	0.160377	0.167295	GTF2B
KYAT3	1244	11006	12250	6.82288e+06	0.650813	0	two.sided	FALSE	TRUE	0.798703	-0.0603264	KYAT3
RBMXL1	1244	11006	12250	6.88638e+06	0.273632	0	two.sided	FALSE	TRUE	0.466832	0.225044	RBMXL1
GBP3	1244	11006	12250	7.0063e+06	0.00248566	0	two.sided	FALSE	TRUE	0.0126735	0.441492	GBP3
GBP1	1244	11006	12250	7.33728e+06	2.66373e-13	0	two.sided	FALSE	TRUE	7.39435e-12	0.758993	GBP1
GBP2	1244	11006	12250	7566742	9.20377e-18	0	two.sided	FALSE	TRUE	3.67484e-16	0.633373	GBP2
GBP4	1244	11006	12250	6897188	0.475842	0	two.sided	FALSE	TRUE	0.658512	0.0875434	GBP4
AC099063.4	1244	11006	12250	6.88998e+06	0.0256617	0	two.sided	FALSE	TRUE	0.085517	0.809709	AC099063.4
GBP5	1244	11006	12250	8.20834e+06	3.89873e-43	0	two.sided	FALSE	TRUE	4.51433e-41	0.806345	GBP5
LRRC8B	1244	11006	12250	6975752	7.11384e-12	0	two.sided	FALSE	TRUE	1.70541e-10	1.88011	LRRC8B
LRRC8C-DT	1244	11006	12250	6885549	0.0606193	0	two.sided	FALSE	TRUE	0.163197	0.670391	LRRC8C-DT
LRRC8C	1244	11006	12250	7.14141e+06	1.54633e-08	0	two.sided	FALSE	TRUE	2.41633e-07	0.785186	LRRC8C
LRRC8D	1244	11006	12250	6850413	0.882059	0	two.sided	FALSE	TRUE	0.939073	0.0882119	LRRC8D
ZNF326	1244	11006	12250	7.15283e+06	1.94363e-05	0	two.sided	FALSE	TRUE	0.00017596	0.397018	ZNF326
ZNF644	1244	11006	12250	7194279	3.38632e-05	0	two.sided	FALSE	TRUE	0.000288099	0.326231	ZNF644
CDC7	1244	11006	12250	6.95873e+06	0.000290594	0	two.sided	FALSE	TRUE	0.00198162	0.801631	CDC7
TGFBR3	1244	11006	12250	6716696	0.235999	0	two.sided	FALSE	TRUE	0.422615	-0.0587122	TGFBR3
EPHX4	1244	11006	12250	6807971	0.2657	0	two.sided	FALSE	TRUE	0.457751	-0.334876	EPHX4
BTBD8	1244	11006	12250	6847255	0.932804	0	two.sided	FALSE	TRUE	0.967892	0.00485788	BTBD8
GLMN	1244	11006	12250	6.83923e+06	0.896426	0	two.sided	FALSE	TRUE	0.947919	-0.0253505	GLMN
RPAP2	1244	11006	12250	7001745	0.0277821	0	two.sided	FALSE	TRUE	0.0904985	0.231884	RPAP2
GFI1	1244	11006	12250	7.07408e+06	6.34784e-05	0	two.sided	FALSE	TRUE	0.000510074	0.486436	GFI1
EVI5	1244	11006	12250	6849708	0.822085	0	two.sided	FALSE	TRUE	0.907929	0.0100153	EVI5
RPL5	1244	11006	12250	5894717	6.60489e-16	0	two.sided	FALSE	TRUE	2.31751e-14	-0.0780365	RPL5
FAM69A	1244	11006	12250	6857896	0.736377	0	two.sided	FALSE	TRUE	0.855093	0.0870164	FAM69A
MTF2	1244	11006	12250	7019509	0.0104077	0	two.sided	FALSE	TRUE	0.0414383	0.280577	MTF2
TMED5	1244	11006	12250	7131947	0.000394322	0	two.sided	FALSE	TRUE	0.00258835	0.302318	TMED5
CCDC18	1244	11006	12250	6927236	0.0649767	0	two.sided	FALSE	TRUE	0.17146	0.349056	CCDC18
DR1	1244	11006	12250	6.97428e+06	0.126123	0	two.sided	FALSE	TRUE	0.274714	0.137585	DR1
DNTTIP2	1244	11006	12250	6866859	0.828392	0	two.sided	FALSE	TRUE	0.912179	0.0303061	DNTTIP2
GCLM	1244	11006	12250	6861276	0.783287	0	two.sided	FALSE	TRUE	0.883624	0.0185683	GCLM
ABCD3	1244	11006	12250	6.94094e+06	0.0520453	0	two.sided	FALSE	TRUE	0.145458	0.364928	ABCD3
ALG14	1244	11006	12250	6820322	0.272956	0	two.sided	FALSE	TRUE	0.46616	-0.474875	ALG14
RWDD3	1244	11006	12250	6858321	0.829849	0	two.sided	FALSE	TRUE	0.913102	0.0246286	RWDD3
PTBP2	1244	11006	12250	6983162	0.000961922	0	two.sided	FALSE	TRUE	0.00564526	0.611322	PTBP2
DPYD	1244	11006	12250	6.97596e+06	0.0887945	0	two.sided	FALSE	TRUE	0.21478	0.178383	DPYD
AGL	1244	11006	12250	6.76617e+06	0.206929	0	two.sided	FALSE	TRUE	0.388776	-0.181772	AGL
AC118553.1	1244	11006	12250	6864250	0.151956	0	two.sided	FALSE	TRUE	0.313078	0.745189	AC118553.1
SLC35A3	1244	11006	12250	6934305	0.00942577	0	two.sided	FALSE	TRUE	0.0382682	0.556733	SLC35A3
AC118553.2	1244	11006	12250	6844635	0.933724	0	two.sided	FALSE	TRUE	0.967892	-0.0544841	AC118553.2
MFSD14A	1244	11006	12250	6.96217e+06	0.103582	0	two.sided	FALSE	TRUE	0.238588	0.180436	MFSD14A
SASS6	1244	11006	12250	6848957	0.931665	0	two.sided	FALSE	TRUE	0.967892	0.00969083	SASS6
TRMT13	1244	11006	12250	6855596	0.797274	0	two.sided	FALSE	TRUE	0.893046	0.0563922	TRMT13
DBT	1244	11006	12250	6833824	0.616054	0	two.sided	FALSE	TRUE	0.773256	-0.133603	DBT
RTCA	1244	11006	12250	7.03135e+06	0.00410369	0	two.sided	FALSE	TRUE	0.0193708	0.312769	RTCA
CDC14A	1244	11006	12250	7281130	8.49841e-12	0	two.sided	FALSE	TRUE	2.01233e-10	0.703276	CDC14A
EXTL2	1244	11006	12250	6821699	0.428232	0	two.sided	FALSE	TRUE	0.618575	-0.237293	EXTL2
AC104506.1	1244	11006	12250	6.93352e+06	2.40461e-12	0	two.sided	FALSE	TRUE	6.066e-11	2.63784	AC104506.1
SLC30A7	1244	11006	12250	6.89373e+06	0.412703	0	two.sided	FALSE	TRUE	0.604821	0.0839459	SLC30A7
DPH5	1244	11006	12250	6.79233e+06	0.187491	0	two.sided	FALSE	TRUE	0.362776	-0.277142	DPH5
AC093157.1	1244	11006	12250	6.83015e+06	0.493131	0	two.sided	FALSE	TRUE	0.6743	-0.321232	AC093157.1
AL109741.1	1244	11006	12250	6939453	4.0509e-10	0	two.sided	FALSE	TRUE	7.87004e-09	2.18824	AL109741.1
S1PR1	1244	11006	12250	7221406	2.428e-06	0	two.sided	FALSE	TRUE	2.64476e-05	0.405246	S1PR1
RNPC3	1244	11006	12250	6.85204e+06	0.940676	0	two.sided	FALSE	TRUE	0.971294	0.0239197	RNPC3
AMY2B	1244	11006	12250	6853054	0.627835	0	two.sided	FALSE	TRUE	0.781101	0.242421	AMY2B
PRMT6	1244	11006	12250	6.82725e+06	0.392581	0	two.sided	FALSE	TRUE	0.585844	-0.398154	PRMT6
VAV3	1244	11006	12250	6.713e+06	0.100547	0	two.sided	FALSE	TRUE	0.233687	-0.162927	VAV3
SLC25A24	1244	11006	12250	6.82458e+06	0.719876	0	two.sided	FALSE	TRUE	0.843424	-0.0549872	SLC25A24
AL359258.2	1244	11006	12250	6823482	0.190565	0	two.sided	FALSE	TRUE	0.36678	-0.852786	AL359258.2
FAM102B	1244	11006	12250	6893870	0.398088	0	two.sided	FALSE	TRUE	0.59088	0.11501	FAM102B
HENMT1	1244	11006	12250	6572253	7.36995e-06	0	two.sided	FALSE	TRUE	7.28129e-05	-0.743925	HENMT1
PRPF38B	1244	11006	12250	7.30567e+06	3.64564e-06	0	two.sided	FALSE	TRUE	3.85154e-05	0.277009	PRPF38B
STXBP3	1244	11006	12250	6834442	0.836179	0	two.sided	FALSE	TRUE	0.914982	-0.0373716	STXBP3
GPSM2	1244	11006	12250	6851192	0.723563	0	two.sided	FALSE	TRUE	0.846704	0.186561	GPSM2
CLCC1	1244	11006	12250	6830754	0.62456	0	two.sided	FALSE	TRUE	0.779218	-0.158895	CLCC1
WDR47	1244	11006	12250	6846046	0.994341	0	two.sided	FALSE	TRUE	0.998134	-0.00818963	WDR47
TAF13	1244	11006	12250	6856174	0.752106	0	two.sided	FALSE	TRUE	0.865497	0.0925634	TAF13
AL356488.3	1244	11006	12250	6910766	1.30696e-06	0	two.sided	FALSE	TRUE	1.51333e-05	1.89125	AL356488.3
TMEM167B	1244	11006	12250	6996641	0.0193455	0	two.sided	FALSE	TRUE	0.0684393	0.296174	TMEM167B
AL356488.2	1244	11006	12250	6867105	0.178005	0	two.sided	FALSE	TRUE	0.350353	0.675394	AL356488.2
KIAA1324	1244	11006	12250	6848749	0.886965	0	two.sided	FALSE	TRUE	0.941907	0.0500417	KIAA1324
SARS	1244	11006	12250	6.76552e+06	0.315676	0	two.sided	FALSE	TRUE	0.513156	-0.103868	SARS
CELSR2	1244	11006	12250	6.83322e+06	0.47204	0	two.sided	FALSE	TRUE	0.655444	-0.465109	CELSR2
PSRC1	1244	11006	12250	6850760	0.702985	0	two.sided	FALSE	TRUE	0.832502	0.230834	PSRC1
PSMA5	1244	11006	12250	6888978	0.626796	0	two.sided	FALSE	TRUE	0.780563	0.0385401	PSMA5
ATXN7L2	1244	11006	12250	6832695	0.678946	0	two.sided	FALSE	TRUE	0.818769	-0.0793447	ATXN7L2
CYB561D1	1244	11006	12250	6791127	0.174021	0	two.sided	FALSE	TRUE	0.344914	-0.340671	CYB561D1
AMIGO1	1244	11006	12250	6848642	0.863303	0	two.sided	FALSE	TRUE	0.929162	0.162748	AMIGO1
GNAI3	1244	11006	12250	6654546	0.0192959	0	two.sided	FALSE	TRUE	0.0683056	-0.211648	GNAI3
AMPD2	1244	11006	12250	6.82205e+06	0.57948	0	two.sided	FALSE	TRUE	0.746128	-0.151816	AMPD2
GSTM4	1244	11006	12250	6676343	0.00107248	0	two.sided	FALSE	TRUE	0.00621843	-0.668266	GSTM4
GSTM2	1244	11006	12250	6.86774e+06	0.493052	0	two.sided	FALSE	TRUE	0.67427	0.14082	GSTM2
AC000032.1	1244	11006	12250	6841525	0.760735	0	two.sided	FALSE	TRUE	0.870411	-0.19862	AC000032.1
GSTM3	1244	11006	12250	6847233	0.949316	0	two.sided	FALSE	TRUE	0.976384	0.026861	GSTM3
CSF1	1244	11006	12250	6853664	0.596731	0	two.sided	FALSE	TRUE	0.758208	0.205518	CSF1
AHCYL1	1244	11006	12250	6706337	0.00952546	0	two.sided	FALSE	TRUE	0.0385044	-0.470007	AHCYL1
STRIP1	1244	11006	12250	6.83383e+06	0.844473	0	two.sided	FALSE	TRUE	0.91971	-0.0349423	STRIP1
RBM15	1244	11006	12250	7227624	2.5232e-09	0	two.sided	FALSE	TRUE	4.37367e-08	0.618583	RBM15
AL355488.1	1244	11006	12250	6845067	0.965661	0	two.sided	FALSE	TRUE	0.983498	-0.024081	AL355488.1
LAMTOR5	1244	11006	12250	7135514	0.00261294	0	two.sided	FALSE	TRUE	0.0131946	0.19776	LAMTOR5
AL365361.1	1244	11006	12250	6.90829e+06	0.0287916	0	two.sided	FALSE	TRUE	0.0928405	0.551643	AL365361.1
KCNA3	1244	11006	12250	7188048	2.23086e-07	0	two.sided	FALSE	TRUE	2.94876e-06	0.557643	KCNA3
CD53	1244	11006	12250	6.35419e+06	5.58798e-06	0	two.sided	FALSE	TRUE	5.67152e-05	-0.233907	CD53
AL360270.1	1244	11006	12250	6.87152e+06	0.211943	0	two.sided	FALSE	TRUE	0.395248	0.491921	AL360270.1
LRIF1	1244	11006	12250	7.065e+06	1.48716e-05	0	two.sided	FALSE	TRUE	0.000138534	0.606184	LRIF1
AL360270.3	1244	11006	12250	6959402	1.20791e-09	0	two.sided	FALSE	TRUE	2.19222e-08	1.90219	AL360270.3
DRAM2	1244	11006	12250	6727298	0.0504645	0	two.sided	FALSE	TRUE	0.142098	-0.279985	DRAM2
CEPT1	1244	11006	12250	6880848	0.332275	0	two.sided	FALSE	TRUE	0.53002	0.181788	CEPT1
AL355816.2	1244	11006	12250	6886691	0.00887982	0	two.sided	FALSE	TRUE	0.0365515	1.05992	AL355816.2
DENND2D	1244	11006	12250	7102897	0.000783259	0	two.sided	FALSE	TRUE	0.00474339	0.32919	DENND2D
CHI3L2	1244	11006	12250	6.74323e+06	0.00653669	0	two.sided	FALSE	TRUE	0.0282928	-0.804961	CHI3L2
WDR77	1244	11006	12250	6669777	0.000271443	0	two.sided	FALSE	TRUE	0.0018642	-0.804187	WDR77
ATP5PB	1244	11006	12250	6.64491e+06	0.055992	0	two.sided	FALSE	TRUE	0.153488	-0.109433	ATP5PB
C1orf162	1244	11006	12250	7.00505e+06	0.00928609	0	two.sided	FALSE	TRUE	0.0378338	0.327723	C1orf162
RAP1A	1244	11006	12250	6598634	0.0103576	0	two.sided	FALSE	TRUE	0.04127	-0.19292	RAP1A
DDX20	1244	11006	12250	6812470	0.505959	0	two.sided	FALSE	TRUE	0.684564	-0.157242	DDX20
ST7L	1244	11006	12250	7.01683e+06	1.20494e-05	0	two.sided	FALSE	TRUE	0.000114548	0.784135	ST7L
CAPZA1	1244	11006	12250	7126820	0.00294454	0	two.sided	FALSE	TRUE	0.0146204	0.181103	CAPZA1
MOV10	1244	11006	12250	6853312	0.868571	0	two.sided	FALSE	TRUE	0.931997	0.0131661	MOV10
RHOC	1244	11006	12250	6.8382e+06	0.905871	0	two.sided	FALSE	TRUE	0.952725	-0.0338747	RHOC
SLC16A1	1244	11006	12250	6.88906e+06	0.257044	0	two.sided	FALSE	TRUE	0.44723	0.264397	SLC16A1
SLC16A1-AS1	1244	11006	12250	6895572	0.123554	0	two.sided	FALSE	TRUE	0.270457	0.385432	SLC16A1-AS1
LRIG2	1244	11006	12250	6.89261e+06	0.212055	0	two.sided	FALSE	TRUE	0.395391	0.265616	LRIG2
PHTF1	1244	11006	12250	6962285	0.0123154	0	two.sided	FALSE	TRUE	0.0474857	0.416875	PHTF1
RSBN1	1244	11006	12250	6943572	0.266073	0	two.sided	FALSE	TRUE	0.458238	0.0769805	RSBN1
PTPN22	1244	11006	12250	7143923	0.00047409	0	two.sided	FALSE	TRUE	0.00304127	0.29408	PTPN22
AP4B1	1244	11006	12250	6888419	0.372378	0	two.sided	FALSE	TRUE	0.567188	0.161317	AP4B1
DCLRE1B	1244	11006	12250	6835535	0.673906	0	two.sided	FALSE	TRUE	0.815377	-0.137028	DCLRE1B
HIPK1-AS1	1244	11006	12250	6873156	0.104633	0	two.sided	FALSE	TRUE	0.240049	0.801859	HIPK1-AS1
HIPK1	1244	11006	12250	7.27814e+06	3.87649e-08	0	two.sided	FALSE	TRUE	5.68926e-07	0.480819	HIPK1
TRIM33	1244	11006	12250	6985494	0.0729661	0	two.sided	FALSE	TRUE	0.185734	0.149815	TRIM33
BCAS2	1244	11006	12250	7525747	5.28107e-14	0	two.sided	FALSE	TRUE	1.5883e-12	0.502564	BCAS2
DENND2C	1244	11006	12250	6864695	0.212639	0	two.sided	FALSE	TRUE	0.395942	0.62092	DENND2C
NRAS	1244	11006	12250	6.81473e+06	0.619311	0	two.sided	FALSE	TRUE	0.775663	-0.0845099	NRAS
CSDE1	1244	11006	12250	7.0749e+06	0.038236	0	two.sided	FALSE	TRUE	0.115839	0.0838844	CSDE1
SIKE1	1244	11006	12250	6928777	0.169906	0	two.sided	FALSE	TRUE	0.338866	0.163564	SIKE1
TSPAN2	1244	11006	12250	6609331	0.000247387	0	two.sided	FALSE	TRUE	0.00171321	-0.512213	TSPAN2
VANGL1	1244	11006	12250	6799218	0.148739	0	two.sided	FALSE	TRUE	0.308536	-0.449364	VANGL1
ATP1A1	1244	11006	12250	6785458	0.515931	0	two.sided	FALSE	TRUE	0.692844	-0.0549523	ATP1A1
CD58	1244	11006	12250	6.78215e+06	0.385986	0	two.sided	FALSE	TRUE	0.57983	-0.091728	CD58
CD2	1244	11006	12250	6688263	0.158893	0	two.sided	FALSE	TRUE	0.323517	-0.0658352	CD2
CD101	1244	11006	12250	6841472	0.899526	0	two.sided	FALSE	TRUE	0.950178	0.00839568	CD101
TTF2	1244	11006	12250	6.90406e+06	0.164181	0	two.sided	FALSE	TRUE	0.331111	0.272643	TTF2
MAN1A2	1244	11006	12250	6888529	0.60988	0	two.sided	FALSE	TRUE	0.769091	0.0325911	MAN1A2
TENT5C	1244	11006	12250	6.9295e+06	0.365812	0	two.sided	FALSE	TRUE	0.561935	0.0532329	TENT5C
GDAP2	1244	11006	12250	6.84338e+06	0.960079	0	two.sided	FALSE	TRUE	0.981282	-0.0159495	GDAP2
WDR3	1244	11006	12250	6833473	0.700839	0	two.sided	FALSE	TRUE	0.831633	-0.142818	WDR3
WARS2	1244	11006	12250	6882431	0.403006	0	two.sided	FALSE	TRUE	0.595509	0.152486	WARS2
AL359915.2	1244	11006	12250	6876758	0.297677	0	two.sided	FALSE	TRUE	0.494237	0.244803	AL359915.2
PHGDH	1244	11006	12250	6834752	0.608854	0	two.sided	FALSE	TRUE	0.7683	-0.101996	PHGDH
NOTCH2	1244	11006	12250	6783185	0.231469	0	two.sided	FALSE	TRUE	0.417669	-0.205425	NOTCH2
SEC22B	1244	11006	12250	6934444	0.138512	0	two.sided	FALSE	TRUE	0.292723	0.177524	SEC22B
NBPF26	1244	11006	12250	6861547	0.689748	0	two.sided	FALSE	TRUE	0.82557	0.090217	NBPF26
LINC00623	1244	11006	12250	6765704	0.211243	0	two.sided	FALSE	TRUE	0.394323	-0.144022	LINC00623
SRGAP2C	1244	11006	12250	6.8523e+06	0.828615	0	two.sided	FALSE	TRUE	0.912201	0.0585972	SRGAP2C
AC239800.3	1244	11006	12250	6.84386e+06	0.953462	0	two.sided	FALSE	TRUE	0.977966	-0.0492744	AC239800.3
AC246785.3	1244	11006	12250	6.83674e+06	0.462847	0	two.sided	FALSE	TRUE	0.647493	-0.618032	AC246785.3
NBPF15	1244	11006	12250	7.01561e+06	0.000142031	0	two.sided	FALSE	TRUE	0.00105378	0.605861	NBPF15
SRGAP2B	1244	11006	12250	6873109	0.105228	0	two.sided	FALSE	TRUE	0.240941	0.683797	SRGAP2B
AC245014.3	1244	11006	12250	7.21519e+06	3.15715e-13	0	two.sided	FALSE	TRUE	8.66271e-12	0.983185	AC245014.3
NBPF20	1244	11006	12250	6.88275e+06	0.108009	0	two.sided	FALSE	TRUE	0.245801	0.482091	NBPF20
GPR89A	1244	11006	12250	6792483	0.223465	0	two.sided	FALSE	TRUE	0.408703	-0.279781	GPR89A
CD160	1244	11006	12250	6.87589e+06	0.440434	0	two.sided	FALSE	TRUE	0.628427	0.166507	CD160
RNF115	1244	11006	12250	7.21585e+06	3.59262e-05	0	two.sided	FALSE	TRUE	0.0003032	0.337345	RNF115
POLR3C	1244	11006	12250	6772253	0.172353	0	two.sided	FALSE	TRUE	0.342324	-0.225728	POLR3C
NUDT17	1244	11006	12250	6.842e+06	0.861023	0	two.sided	FALSE	TRUE	0.92847	-0.0790874	NUDT17
PIAS3	1244	11006	12250	6.81754e+06	0.54348	0	two.sided	FALSE	TRUE	0.715013	-0.129751	PIAS3
ANKRD35	1244	11006	12250	6764088	0.00212977	0	two.sided	FALSE	TRUE	0.0111486	-1.51982	ANKRD35
PEX11B	1244	11006	12250	6.81743e+06	0.563068	0	two.sided	FALSE	TRUE	0.732228	-0.0891304	PEX11B
RBM8A	1244	11006	12250	6.72589e+06	0.264697	0	two.sided	FALSE	TRUE	0.456295	-0.0583366	RBM8A
LIX1L-AS1	1244	11006	12250	6.84506e+06	0.965481	0	two.sided	FALSE	TRUE	0.983452	-0.0370885	LIX1L-AS1
LIX1L	1244	11006	12250	6.58483e+06	0.000436098	0	two.sided	FALSE	TRUE	0.00282415	-0.419063	LIX1L
ANKRD34A	1244	11006	12250	6855351	0.566933	0	two.sided	FALSE	TRUE	0.735932	0.260684	ANKRD34A
POLR3GL	1244	11006	12250	6241032	7.38368e-11	0	two.sided	FALSE	TRUE	1.56585e-09	-0.5674	POLR3GL
TXNIP	1244	11006	12250	5495192	1.83497e-30	0	two.sided	FALSE	TRUE	1.37968e-28	-0.230414	TXNIP
NBPF10	1244	11006	12250	6907539	0.108996	0	two.sided	FALSE	TRUE	0.247221	0.274705	NBPF10
NOTCH2NL	1244	11006	12250	6871749	0.149637	0	two.sided	FALSE	TRUE	0.309732	0.555768	NOTCH2NL
NBPF12	1244	11006	12250	6842547	0.936564	0	two.sided	FALSE	TRUE	0.969035	-0.0525405	NBPF12
PRKAB2	1244	11006	12250	6845190	0.989468	0	two.sided	FALSE	TRUE	0.99527	-0.00111803	PRKAB2
AC242426.2	1244	11006	12250	6824246	0.311319	0	two.sided	FALSE	TRUE	0.509244	-0.481681	AC242426.2
FMO5	1244	11006	12250	6851518	0.752342	0	two.sided	FALSE	TRUE	0.865597	0.124063	FMO5
CHD1L	1244	11006	12250	6787457	0.26441	0	two.sided	FALSE	TRUE	0.455934	-0.117752	CHD1L
LINC00624	1244	11006	12250	6841525	0.760735	0	two.sided	FALSE	TRUE	0.870411	-0.19862	LINC00624
BCL9	1244	11006	12250	6831991	0.434552	0	two.sided	FALSE	TRUE	0.623736	-0.47593	BCL9
ACP6	1244	11006	12250	6846644	0.968334	0	two.sided	FALSE	TRUE	0.98434	-0.033557	ACP6
GPR89B	1244	11006	12250	6852992	0.842274	0	two.sided	FALSE	TRUE	0.918505	0.051433	GPR89B
NBPF11	1244	11006	12250	6.8064e+06	0.416019	0	two.sided	FALSE	TRUE	0.607757	-0.0723044	NBPF11
NBPF14	1244	11006	12250	6.89309e+06	0.396973	0	two.sided	FALSE	TRUE	0.590043	0.0723717	NBPF14
PDE4DIP	1244	11006	12250	6851579	0.890535	0	two.sided	FALSE	TRUE	0.944172	0.0367539	PDE4DIP
NBPF9	1244	11006	12250	6.8428e+06	0.881148	0	two.sided	FALSE	TRUE	0.938621	-0.0909349	NBPF9
AC245297.3	1244	11006	12250	6863735	0.727983	0	two.sided	FALSE	TRUE	0.849901	0.0847269	AC245297.3
AC245297.2	1244	11006	12250	6852617	0.590484	0	two.sided	FALSE	TRUE	0.754492	0.269916	AC245297.2
NBPF19	1244	11006	12250	7078100	0.00214427	0	two.sided	FALSE	TRUE	0.0112179	0.285305	NBPF19
HIST2H2BF	1244	11006	12250	7314667	6.33102e-44	0	two.sided	FALSE	TRUE	7.40473e-42	2.22488	HIST2H2BF
HIST2H3D	1244	11006	12250	7001248	2.85141e-13	0	two.sided	FALSE	TRUE	7.87982e-12	1.83889	HIST2H3D
HIST2H2AA4	1244	11006	12250	7.0147e+06	8.11672e-27	0	two.sided	FALSE	TRUE	5.27997e-25	2.97754	HIST2H2AA4
HIST2H2BE	1244	11006	12250	7092783	2.07986e-24	0	two.sided	FALSE	TRUE	1.18634e-22	2.13758	HIST2H2BE
HIST2H2AC	1244	11006	12250	7123026	0.00012091	0	two.sided	FALSE	TRUE	0.000910281	0.393723	HIST2H2AC
HIST2H2AB	1244	11006	12250	7.16732e+06	2.74567e-16	0	two.sided	FALSE	TRUE	9.99753e-15	1.29369	HIST2H2AB
BOLA1	1244	11006	12250	6911052	0.0325088	0	two.sided	FALSE	TRUE	0.102094	0.515552	BOLA1
SV2A	1244	11006	12250	6.87105e+06	0.184031	0	two.sided	FALSE	TRUE	0.358529	0.512043	SV2A
SF3B4	1244	11006	12250	6.31157e+06	8.07937e-09	0	two.sided	FALSE	TRUE	1.30476e-07	-0.480233	SF3B4
OTUD7B	1244	11006	12250	6865514	0.573475	0	two.sided	FALSE	TRUE	0.741532	0.131554	OTUD7B
VPS45	1244	11006	12250	6.91464e+06	0.143883	0	two.sided	FALSE	TRUE	0.301401	0.261137	VPS45
PLEKHO1	1244	11006	12250	6.88012e+06	0.593231	0	two.sided	FALSE	TRUE	0.756167	0.0567494	PLEKHO1
ANP32E	1244	11006	12250	6738814	0.251316	0	two.sided	FALSE	TRUE	0.44064	-0.0911936	ANP32E
APH1A	1244	11006	12250	6529522	0.00114414	0	two.sided	FALSE	TRUE	0.00657468	-0.232359	APH1A
C1orf54	1244	11006	12250	6907989	0.00029412	0	two.sided	FALSE	TRUE	0.00200213	1.28159	C1orf54
MRPS21	1244	11006	12250	6.81479e+06	0.757528	0	two.sided	FALSE	TRUE	0.868629	-0.0212878	MRPS21
PRPF3	1244	11006	12250	6905193	0.373139	0	two.sided	FALSE	TRUE	0.567874	0.14531	PRPF3
RPRD2	1244	11006	12250	6947792	0.100174	0	two.sided	FALSE	TRUE	0.233101	0.189152	RPRD2
TARS2	1244	11006	12250	6825620	0.621318	0	two.sided	FALSE	TRUE	0.777252	-0.109229	TARS2
MCL1	1244	11006	12250	8.11674e+06	4.20056e-32	0	two.sided	FALSE	TRUE	3.37766e-30	0.5538	MCL1
ENSA	1244	11006	12250	6.86633e+06	0.836833	0	two.sided	FALSE	TRUE	0.915244	0.00981782	ENSA
GOLPH3L	1244	11006	12250	6856252	0.669428	0	two.sided	FALSE	TRUE	0.811655	0.129792	GOLPH3L
CTSS	1244	11006	12250	6.60612e+06	0.0111656	0	two.sided	FALSE	TRUE	0.0438112	-0.204939	CTSS
CTSK	1244	11006	12250	6861662	0.276806	0	two.sided	FALSE	TRUE	0.470582	0.516897	CTSK
ARNT	1244	11006	12250	6802584	0.332749	0	two.sided	FALSE	TRUE	0.530527	-0.222722	ARNT
SETDB1	1244	11006	12250	6.91622e+06	0.220137	0	two.sided	FALSE	TRUE	0.404791	0.147292	SETDB1
CERS2	1244	11006	12250	6.76495e+06	0.282026	0	two.sided	FALSE	TRUE	0.476171	-0.12439	CERS2
MINDY1	1244	11006	12250	6.83736e+06	0.489242	0	two.sided	FALSE	TRUE	0.671414	-0.623699	MINDY1
PRUNE1	1244	11006	12250	6853336	0.836635	0	two.sided	FALSE	TRUE	0.915201	0.0340962	PRUNE1
C1orf56	1244	11006	12250	6885283	0.0820189	0	two.sided	FALSE	TRUE	0.202273	0.546611	C1orf56
CDC42SE1	1244	11006	12250	7.15819e+06	0.00364635	0	two.sided	FALSE	TRUE	0.0175191	0.141248	CDC42SE1
MLLT11	1244	11006	12250	6984758	3.49211e-05	0	two.sided	FALSE	TRUE	0.000295795	0.911175	MLLT11
GABPB2	1244	11006	12250	6750054	0.0340054	0	two.sided	FALSE	TRUE	0.105847	-0.428369	GABPB2
TNFAIP8L2	1244	11006	12250	6.80408e+06	0.104128	0	two.sided	FALSE	TRUE	0.239225	-0.655748	TNFAIP8L2
SCNM1	1244	11006	12250	6911855	0.41738	0	two.sided	FALSE	TRUE	0.608517	0.060707	SCNM1
VPS72	1244	11006	12250	6.7536e+06	0.118747	0	two.sided	FALSE	TRUE	0.262934	-0.245192	VPS72
PIP5K1A	1244	11006	12250	6884310	0.370728	0	two.sided	FALSE	TRUE	0.565678	0.188694	PIP5K1A
PSMD4	1244	11006	12250	6.38992e+06	1.93618e-06	0	two.sided	FALSE	TRUE	2.16191e-05	-0.358235	PSMD4
AL391069.2	1244	11006	12250	6898502	8.62941e-05	0	two.sided	FALSE	TRUE	0.000672409	1.57272	AL391069.2
ZNF687	1244	11006	12250	6876766	0.448481	0	two.sided	FALSE	TRUE	0.635536	0.141121	ZNF687
PI4KB	1244	11006	12250	6.7926e+06	0.420024	0	two.sided	FALSE	TRUE	0.611187	-0.0941116	PI4KB
RFX5	1244	11006	12250	6.86438e+06	0.677907	0	two.sided	FALSE	TRUE	0.818592	0.0742778	RFX5
AL391069.3	1244	11006	12250	6866108	0.10378	0	two.sided	FALSE	TRUE	0.238686	0.773197	AL391069.3
PSMB4	1244	11006	12250	6938758	0.26612	0	two.sided	FALSE	TRUE	0.458238	0.083223	PSMB4
POGZ	1244	11006	12250	6.77427e+06	0.310217	0	two.sided	FALSE	TRUE	0.507991	-0.134662	POGZ
SNX27	1244	11006	12250	6.79001e+06	0.291009	0	two.sided	FALSE	TRUE	0.486302	-0.194463	SNX27
AL589765.7	1244	11006	12250	6861698	0.275721	0	two.sided	FALSE	TRUE	0.469497	0.636071	AL589765.7
MRPL9	1244	11006	12250	6.89001e+06	0.598811	0	two.sided	FALSE	TRUE	0.760017	0.0460955	MRPL9
TDRKH	1244	11006	12250	6804218	0.0964648	0	two.sided	FALSE	TRUE	0.227349	-0.655858	TDRKH
TDRKH-AS1	1244	11006	12250	6815738	0.14817	0	two.sided	FALSE	TRUE	0.307942	-0.736701	TDRKH-AS1
THEM4	1244	11006	12250	6.89933e+06	0.401694	0	two.sided	FALSE	TRUE	0.594252	0.0821017	THEM4
S100A10	1244	11006	12250	6.08585e+06	8.16054e-11	0	two.sided	FALSE	TRUE	1.72115e-09	-0.139136	S100A10
S100A11	1244	11006	12250	6.14629e+06	1.06141e-11	0	two.sided	FALSE	TRUE	2.49292e-10	-0.466996	S100A11
S100A9	1244	11006	12250	6804501	0.233851	0	two.sided	FALSE	TRUE	0.420199	-0.406998	S100A9
S100A8	1244	11006	12250	6832158	0.644356	0	two.sided	FALSE	TRUE	0.793808	-0.189016	S100A8
S100A6	1244	11006	12250	4.74164e+06	1.54552e-71	0	two.sided	FALSE	TRUE	3.89035e-69	-0.266691	S100A6
S100A4	1244	11006	12250	3.85134e+06	6.48304e-142	0	two.sided	FALSE	TRUE	5.00447e-139	-0.304947	S100A4
AL162258.2	1244	11006	12250	6.86997e+06	0.163475	0	two.sided	FALSE	TRUE	0.330173	0.526891	AL162258.2
CHTOP	1244	11006	12250	6.96817e+06	0.0577145	0	two.sided	FALSE	TRUE	0.157205	0.203746	CHTOP
SNAPIN	1244	11006	12250	6837794	0.879358	0	two.sided	FALSE	TRUE	0.937673	-0.0339626	SNAPIN
ILF2	1244	11006	12250	6659598	0.0522313	0	two.sided	FALSE	TRUE	0.145837	-0.126658	ILF2
INTS3	1244	11006	12250	6732113	0.0178129	0	two.sided	FALSE	TRUE	0.0643342	-0.505507	INTS3
SLC27A3	1244	11006	12250	6.61768e+06	4.69426e-05	0	two.sided	FALSE	TRUE	0.000388249	-0.70207	SLC27A3
GATAD2B	1244	11006	12250	6922411	0.267949	0	two.sided	FALSE	TRUE	0.460051	0.144416	GATAD2B
DENND4B	1244	11006	12250	6908841	0.307486	0	two.sided	FALSE	TRUE	0.505001	0.148114	DENND4B
CRTC2	1244	11006	12250	6850268	0.950893	0	two.sided	FALSE	TRUE	0.977149	0.00658065	CRTC2
SLC39A1	1244	11006	12250	6680560	0.000233703	0	two.sided	FALSE	TRUE	0.00163113	-0.873981	SLC39A1
CREB3L4	1244	11006	12250	6821424	0.204153	0	two.sided	FALSE	TRUE	0.385605	-0.707966	CREB3L4
JTB	1244	11006	12250	6281183	2.55589e-07	0	two.sided	FALSE	TRUE	3.35074e-06	-0.247987	JTB
RPS27	1244	11006	12250	5974315	1.6719e-13	0	two.sided	FALSE	TRUE	4.79181e-12	-0.0422277	RPS27
TPM3	1244	11006	12250	6.12269e+06	5.89704e-10	0	two.sided	FALSE	TRUE	1.12121e-08	-0.114688	TPM3
C1orf43	1244	11006	12250	6.84603e+06	0.997188	0	two.sided	FALSE	TRUE	0.998869	0.0169438	C1orf43
UBAP2L	1244	11006	12250	6839572	0.922078	0	two.sided	FALSE	TRUE	0.962129	0.00657734	UBAP2L
HAX1	1244	11006	12250	6.64059e+06	0.00451703	0	two.sided	FALSE	TRUE	0.0210051	-0.3461	HAX1
ATP8B2	1244	11006	12250	6.78918e+06	0.324914	0	two.sided	FALSE	TRUE	0.522815	-0.158287	ATP8B2
UBE2Q1	1244	11006	12250	6777513	0.30139	0	two.sided	FALSE	TRUE	0.49792	-0.118088	UBE2Q1
ADAR	1244	11006	12250	6980875	0.198965	0	two.sided	FALSE	TRUE	0.37842	0.069299	ADAR
PMVK	1244	11006	12250	6.64876e+06	0.000941407	0	two.sided	FALSE	TRUE	0.00554714	-0.532903	PMVK
AL451085.1	1244	11006	12250	6.88784e+06	0.0106856	0	two.sided	FALSE	TRUE	0.0423295	0.999476	AL451085.1
PBXIP1	1244	11006	12250	6750231	0.2763	0	two.sided	FALSE	TRUE	0.470131	-0.108759	PBXIP1
PYGO2	1244	11006	12250	6876400	0.431806	0	two.sided	FALSE	TRUE	0.621257	0.127725	PYGO2
AL451085.2	1244	11006	12250	6811429	0.264005	0	two.sided	FALSE	TRUE	0.455507	-0.259879	AL451085.2
SHC1	1244	11006	12250	6782556	0.254672	0	two.sided	FALSE	TRUE	0.444468	-0.194116	SHC1
CKS1B	1244	11006	12250	6.75693e+06	0.0145673	0	two.sided	FALSE	TRUE	0.0546936	-0.625801	CKS1B
FLAD1	1244	11006	12250	6.72962e+06	0.0422411	0	two.sided	FALSE	TRUE	0.125284	-0.321209	FLAD1
ZBTB7B	1244	11006	12250	6759022	0.0346965	0	two.sided	FALSE	TRUE	0.107679	-0.477171	ZBTB7B
ADAM15	1244	11006	12250	6641444	0.000958657	0	two.sided	FALSE	TRUE	0.00563467	-0.50192	ADAM15
EFNA4	1244	11006	12250	6839301	0.780778	0	two.sided	FALSE	TRUE	0.882185	-0.129681	EFNA4
SLC50A1	1244	11006	12250	6690837	0.00487292	0	two.sided	FALSE	TRUE	0.0223637	-0.462565	SLC50A1
DPM3	1244	11006	12250	6.5605e+06	0.000503968	0	two.sided	FALSE	TRUE	0.00320629	-0.335444	DPM3
KRTCAP2	1244	11006	12250	6.29361e+06	5.76405e-07	0	two.sided	FALSE	TRUE	7.13817e-06	-0.232797	KRTCAP2
TRIM46	1244	11006	12250	6.87417e+06	0.126471	0	two.sided	FALSE	TRUE	0.275157	0.601406	TRIM46
THBS3	1244	11006	12250	6.87148e+06	0.212759	0	two.sided	FALSE	TRUE	0.396067	0.451186	THBS3
MTX1	1244	11006	12250	6.69822e+06	0.01115	0	two.sided	FALSE	TRUE	0.0437646	-0.413598	MTX1
GBA	1244	11006	12250	6.76896e+06	0.134298	0	two.sided	FALSE	TRUE	0.28659	-0.251021	GBA
FAM189B	1244	11006	12250	6.74097e+06	0.00298071	0	two.sided	FALSE	TRUE	0.0147747	-0.956411	FAM189B
SCAMP3	1244	11006	12250	6.59794e+06	0.00304987	0	two.sided	FALSE	TRUE	0.0150466	-0.302506	SCAMP3
CLK2	1244	11006	12250	6.86371e+06	0.739796	0	two.sided	FALSE	TRUE	0.857467	0.0327671	CLK2
HCN3	1244	11006	12250	6842238	0.777948	0	two.sided	FALSE	TRUE	0.880792	-0.242915	HCN3
FDPS	1244	11006	12250	6624851	0.00792455	0	two.sided	FALSE	TRUE	0.0332458	-0.267068	FDPS
RUSC1-AS1	1244	11006	12250	6823772	0.108713	0	two.sided	FALSE	TRUE	0.24687	-1.5013	RUSC1-AS1
RUSC1	1244	11006	12250	6.74208e+06	0.0460536	0	two.sided	FALSE	TRUE	0.133314	-0.334222	RUSC1
ASH1L	1244	11006	12250	7249681	6.85087e-06	0	two.sided	FALSE	TRUE	6.80912e-05	0.305094	ASH1L
ASH1L-AS1	1244	11006	12250	6.98165e+06	0.00706194	0	two.sided	FALSE	TRUE	0.0302254	0.388377	ASH1L-AS1
MSTO1	1244	11006	12250	6801060	0.297942	0	two.sided	FALSE	TRUE	0.494463	-0.226302	MSTO1
YY1AP1	1244	11006	12250	7235889	9.2886e-07	0	two.sided	FALSE	TRUE	1.10879e-05	0.403979	YY1AP1
DAP3	1244	11006	12250	6.7459e+06	0.244872	0	two.sided	FALSE	TRUE	0.433609	-0.085719	DAP3
GON4L	1244	11006	12250	6.90147e+06	0.520032	0	two.sided	FALSE	TRUE	0.695961	0.0384326	GON4L
SYT11	1244	11006	12250	6.60857e+06	0.00527488	0	two.sided	FALSE	TRUE	0.0237749	-0.239262	SYT11
RIT1	1244	11006	12250	6.94932e+06	0.0605911	0	two.sided	FALSE	TRUE	0.163197	0.260499	RIT1
KHDC4	1244	11006	12250	6966009	0.0326141	0	two.sided	FALSE	TRUE	0.102203	0.280429	KHDC4
ARHGEF2	1244	11006	12250	6.88579e+06	0.526257	0	two.sided	FALSE	TRUE	0.701292	0.0882828	ARHGEF2
SSR2	1244	11006	12250	6705662	0.22141	0	two.sided	FALSE	TRUE	0.406164	-0.0350509	SSR2
UBQLN4	1244	11006	12250	6769678	0.0669523	0	two.sided	FALSE	TRUE	0.174722	-0.418091	UBQLN4
LAMTOR2	1244	11006	12250	6.6398e+06	0.011233	0	two.sided	FALSE	TRUE	0.0440009	-0.247074	LAMTOR2
LMNA	1244	11006	12250	7305337	2.97968e-14	0	two.sided	FALSE	TRUE	9.12742e-13	0.912887	LMNA
SEMA4A	1244	11006	12250	6802426	0.0243259	0	two.sided	FALSE	TRUE	0.081976	-1.55867	SEMA4A
SLC25A44	1244	11006	12250	6868579	0.353811	0	two.sided	FALSE	TRUE	0.550198	0.325197	SLC25A44
PMF1	1244	11006	12250	6.83586e+06	0.743434	0	two.sided	FALSE	TRUE	0.859533	-0.0836507	PMF1
SMG5	1244	11006	12250	6843161	0.965408	0	two.sided	FALSE	TRUE	0.983452	0.0159538	SMG5
TMEM79	1244	11006	12250	6868672	0.323812	0	two.sided	FALSE	TRUE	0.521332	0.310848	TMEM79
GLMP	1244	11006	12250	6.68597e+06	0.00426253	0	two.sided	FALSE	TRUE	0.0199902	-0.50626	GLMP
CCT3	1244	11006	12250	6696346	0.105714	0	two.sided	FALSE	TRUE	0.241862	-0.136029	CCT3
C1orf61	1244	11006	12250	6878386	0.243064	0	two.sided	FALSE	TRUE	0.431332	0.305379	C1orf61
MEF2D	1244	11006	12250	7.04671e+06	0.0104561	0	two.sided	FALSE	TRUE	0.0415911	0.246065	MEF2D
TTC24	1244	11006	12250	6842799	0.880926	0	two.sided	FALSE	TRUE	0.93849	-0.0989239	TTC24
NAXE	1244	11006	12250	6342886	2.6337e-08	0	two.sided	FALSE	TRUE	3.97596e-07	-0.4913	NAXE
GPATCH4	1244	11006	12250	6757621	0.0835976	0	two.sided	FALSE	TRUE	0.205384	-0.313182	GPATCH4
ISG20L2	1244	11006	12250	6.92828e+06	0.287345	0	two.sided	FALSE	TRUE	0.48171	0.0807189	ISG20L2
RRNAD1	1244	11006	12250	6885430	0.280551	0	two.sided	FALSE	TRUE	0.474926	0.241006	RRNAD1
MRPL24	1244	11006	12250	6553526	3.01845e-06	0	two.sided	FALSE	TRUE	3.24518e-05	-0.720566	MRPL24
HDGF	1244	11006	12250	6.69654e+06	0.0798227	0	two.sided	FALSE	TRUE	0.198511	-0.174723	HDGF
PRCC	1244	11006	12250	6893953	0.447012	0	two.sided	FALSE	TRUE	0.633997	0.111468	PRCC
SH2D2A	1244	11006	12250	6.62314e+06	0.0281604	0	two.sided	FALSE	TRUE	0.0915667	-0.134449	SH2D2A
NTRK1	1244	11006	12250	6888754	0.000873232	0	two.sided	FALSE	TRUE	0.0052227	1.48154	NTRK1
ETV3	1244	11006	12250	6824193	0.707935	0	two.sided	FALSE	TRUE	0.835764	-0.0839989	ETV3
FCRL3	1244	11006	12250	6788405	0.354759	0	two.sided	FALSE	TRUE	0.551235	-0.107793	FCRL3
MNDA	1244	11006	12250	6.85512e+06	0.443626	0	two.sided	FALSE	TRUE	0.63122	0.479365	MNDA
PYHIN1	1244	11006	12250	7.31616e+06	7.06964e-06	0	two.sided	FALSE	TRUE	7.00251e-05	0.247158	PYHIN1
IFI16	1244	11006	12250	7242382	1.84299e-05	0	two.sided	FALSE	TRUE	0.000168031	0.288305	IFI16
AIM2	1244	11006	12250	6869642	0.0944395	0	two.sided	FALSE	TRUE	0.224291	0.739868	AIM2
DUSP23	1244	11006	12250	6.38383e+06	1.53464e-10	0	two.sided	FALSE	TRUE	3.16748e-09	-0.857677	DUSP23
FCRL6	1244	11006	12250	6030949	3.89678e-15	0	two.sided	FALSE	TRUE	1.28184e-13	-0.494194	FCRL6
SLAMF8	1244	11006	12250	6821036	0.155603	0	two.sided	FALSE	TRUE	0.318664	-0.76651	SLAMF8
VSIG8	1244	11006	12250	6.8569e+06	0.396868	0	two.sided	FALSE	TRUE	0.590043	0.573141	VSIG8
TAGLN2	1244	11006	12250	6.36122e+06	3.23587e-05	0	two.sided	FALSE	TRUE	0.000276926	-0.113455	TAGLN2
PIGM	1244	11006	12250	6868040	0.353139	0	two.sided	FALSE	TRUE	0.549597	0.328761	PIGM
IGSF8	1244	11006	12250	6.55379e+06	3.30676e-06	0	two.sided	FALSE	TRUE	3.5322e-05	-0.728203	IGSF8
PEA15	1244	11006	12250	6774632	0.186247	0	two.sided	FALSE	TRUE	0.36105	-0.195132	PEA15
DCAF8	1244	11006	12250	7043370	0.00201912	0	two.sided	FALSE	TRUE	0.0106755	0.374226	DCAF8
AL139011.1	1244	11006	12250	6885344	0.0190767	0	two.sided	FALSE	TRUE	0.0678909	0.904219	AL139011.1
PEX19	1244	11006	12250	6734515	0.0170005	0	two.sided	FALSE	TRUE	0.0621561	-0.494346	PEX19
COPA	1244	11006	12250	6959883	0.186172	0	two.sided	FALSE	TRUE	0.360966	0.126283	COPA
NCSTN	1244	11006	12250	6.68889e+06	0.0108234	0	two.sided	FALSE	TRUE	0.0427205	-0.341237	NCSTN
SLAMF6	1244	11006	12250	6.85195e+06	0.931255	0	two.sided	FALSE	TRUE	0.967892	-0.00785999	SLAMF6
CD84	1244	11006	12250	6.9044e+06	0.391124	0	two.sided	FALSE	TRUE	0.58459	0.112315	CD84
SLAMF1	1244	11006	12250	7108036	4.99078e-12	0	two.sided	FALSE	TRUE	1.21149e-10	1.21173	SLAMF1
AL121985.1	1244	11006	12250	6853153	0.5944	0	two.sided	FALSE	TRUE	0.757074	0.300151	AL121985.1
CD48	1244	11006	12250	7269897	0.000186504	0	two.sided	FALSE	TRUE	0.00134049	0.130494	CD48
SLAMF7	1244	11006	12250	7.14826e+06	0.000229035	0	two.sided	FALSE	TRUE	0.00160533	0.298353	SLAMF7
LY9	1244	11006	12250	7114343	0.000405085	0	two.sided	FALSE	TRUE	0.00265449	0.35289	LY9
CD244	1244	11006	12250	6785564	0.357655	0	two.sided	FALSE	TRUE	0.554212	-0.0890685	CD244
F11R	1244	11006	12250	6813960	0.11518	0	two.sided	FALSE	TRUE	0.257565	-0.865856	F11R
TSTD1	1244	11006	12250	6.20756e+06	3.28362e-11	0	two.sided	FALSE	TRUE	7.21463e-10	-0.495839	TSTD1
USF1	1244	11006	12250	6.97776e+06	0.0176081	0	two.sided	FALSE	TRUE	0.0638333	0.338376	USF1
ARHGAP30	1244	11006	12250	6.40099e+06	1.74491e-05	0	two.sided	FALSE	TRUE	0.000159971	-0.275792	ARHGAP30
PFDN2	1244	11006	12250	7209201	2.10881e-05	0	two.sided	FALSE	TRUE	0.000189433	0.360346	PFDN2
NIT1	1244	11006	12250	6869903	0.569372	0	two.sided	FALSE	TRUE	0.738106	0.107918	NIT1
DEDD	1244	11006	12250	6849297	0.954528	0	two.sided	FALSE	TRUE	0.978182	-0.00218818	DEDD
UFC1	1244	11006	12250	6.83083e+06	0.89002	0	two.sided	FALSE	TRUE	0.943898	-0.0190063	UFC1
USP21	1244	11006	12250	6806447	0.364819	0	two.sided	FALSE	TRUE	0.561502	-0.147819	USP21
PPOX	1244	11006	12250	6.86435e+06	0.697077	0	two.sided	FALSE	TRUE	0.830707	0.0738305	PPOX
B4GALT3	1244	11006	12250	6881470	0.604236	0	two.sided	FALSE	TRUE	0.765057	0.0500015	B4GALT3
NDUFS2	1244	11006	12250	6.7585e+06	0.251083	0	two.sided	FALSE	TRUE	0.440546	-0.104565	NDUFS2
FCER1G	1244	11006	12250	6773884	0.00611263	0	two.sided	FALSE	TRUE	0.0268201	-1.34277	FCER1G
TOMM40L	1244	11006	12250	6834588	0.702544	0	two.sided	FALSE	TRUE	0.83237	-0.161085	TOMM40L
MPZ	1244	11006	12250	6844431	0.933325	0	two.sided	FALSE	TRUE	0.967892	-0.0968182	MPZ
SDHC	1244	11006	12250	6315895	3.93763e-10	0	two.sided	FALSE	TRUE	7.66283e-09	-0.640106	SDHC
AL592295.4	1244	11006	12250	6.79467e+06	0.0238412	0	two.sided	FALSE	TRUE	0.0806476	-1.21392	AL592295.4
FCGR2A	1244	11006	12250	6831664	0.333006	0	two.sided	FALSE	TRUE	0.530527	-0.726266	FCGR2A
HSPA6	1244	11006	12250	7.1779e+06	2.75952e-57	0	two.sided	FALSE	TRUE	4.56464e-55	4.75302	HSPA6
FCGR3A	1244	11006	12250	5798634	6.83806e-22	0	two.sided	FALSE	TRUE	3.55058e-20	-0.531149	FCGR3A
FCGR3B	1244	11006	12250	6908141	0.00497899	0	two.sided	FALSE	TRUE	0.0227086	0.913555	FCGR3B
FCGR2B	1244	11006	12250	6.83744e+06	0.765397	0	two.sided	FALSE	TRUE	0.8735	-0.0921197	FCGR2B
FCRLB	1244	11006	12250	6798694	0.0994919	0	two.sided	FALSE	TRUE	0.232043	-0.589831	FCRLB
DUSP12	1244	11006	12250	6.57452e+06	0.000303104	0	two.sided	FALSE	TRUE	0.00205724	-0.396646	DUSP12
ATF6	1244	11006	12250	6.87437e+06	0.597423	0	two.sided	FALSE	TRUE	0.75892	0.0803323	ATF6
SH2D1B	1244	11006	12250	6781354	0.0159239	0	two.sided	FALSE	TRUE	0.0590593	-0.97764	SH2D1B
UHMK1	1244	11006	12250	6574907	0.00476139	0	two.sided	FALSE	TRUE	0.0219562	-0.204367	UHMK1
AL596325.1	1244	11006	12250	6847555	0.903233	0	two.sided	FALSE	TRUE	0.951854	0.0681533	AL596325.1
UAP1	1244	11006	12250	6841156	0.951227	0	two.sided	FALSE	TRUE	0.977202	-0.0132259	UAP1
HSD17B7	1244	11006	12250	6848243	0.950501	0	two.sided	FALSE	TRUE	0.977149	0.00562271	HSD17B7
NUF2	1244	11006	12250	6855108	0.632002	0	two.sided	FALSE	TRUE	0.784683	0.245002	NUF2
MGST3	1244	11006	12250	6221616	2.14421e-11	0	two.sided	FALSE	TRUE	4.8682e-10	-0.536234	MGST3
ALDH9A1	1244	11006	12250	6.70542e+06	0.0396527	0	two.sided	FALSE	TRUE	0.119474	-0.260102	ALDH9A1
TMCO1	1244	11006	12250	6715013	0.126603	0	two.sided	FALSE	TRUE	0.275242	-0.143113	TMCO1
AL451074.2	1244	11006	12250	6888754	0.000873232	0	two.sided	FALSE	TRUE	0.0052227	1.48154	AL451074.2
UCK2	1244	11006	12250	6862698	0.59668	0	two.sided	FALSE	TRUE	0.758208	0.184877	UCK2
POGK	1244	11006	12250	6.77964e+06	0.160412	0	two.sided	FALSE	TRUE	0.325919	-0.299283	POGK
TADA1	1244	11006	12250	6.81242e+06	0.390704	0	two.sided	FALSE	TRUE	0.584492	-0.217188	TADA1
GPA33	1244	11006	12250	6899150	0.00590757	0	two.sided	FALSE	TRUE	0.0260586	0.911291	GPA33
POU2F1	1244	11006	12250	6929858	0.0499799	0	two.sided	FALSE	TRUE	0.1413	0.349158	POU2F1
CD247	1244	11006	12250	6.91106e+06	0.562852	0	two.sided	FALSE	TRUE	0.732112	0.01429	CD247
AL359962.2	1244	11006	12250	6.86478e+06	0.175494	0	two.sided	FALSE	TRUE	0.346648	0.666338	AL359962.2
CREG1	1244	11006	12250	6.85606e+06	0.74384	0	two.sided	FALSE	TRUE	0.859725	0.141926	CREG1
RCSD1	1244	11006	12250	6591631	0.00657891	0	two.sided	FALSE	TRUE	0.0284031	-0.188347	RCSD1
MPZL1	1244	11006	12250	6849873	0.873235	0	two.sided	FALSE	TRUE	0.933926	0.0163603	MPZL1
MPC2	1244	11006	12250	7.03913e+06	0.032188	0	two.sided	FALSE	TRUE	0.101397	0.171936	MPC2
DCAF6	1244	11006	12250	6978220	0.00374618	0	two.sided	FALSE	TRUE	0.0179392	0.47493	DCAF6
TIPRL	1244	11006	12250	7.02636e+06	0.0212177	0	two.sided	FALSE	TRUE	0.0737334	0.19491	TIPRL
SFT2D2	1244	11006	12250	7.00302e+06	0.0279705	0	two.sided	FALSE	TRUE	0.091026	0.20493	SFT2D2
TBX19	1244	11006	12250	6839748	0.643415	0	two.sided	FALSE	TRUE	0.793438	-0.386674	TBX19
XCL2	1244	11006	12250	7029804	4.72799e-05	0	two.sided	FALSE	TRUE	0.000390481	0.908399	XCL2
XCL1	1244	11006	12250	7.01208e+06	2.99111e-07	0	two.sided	FALSE	TRUE	3.8871e-06	1.41695	XCL1
ATP1B1	1244	11006	12250	6888550	0.0052077	0	two.sided	FALSE	TRUE	0.0235363	1.11902	ATP1B1
NME7	1244	11006	12250	6845052	0.9833	0	two.sided	FALSE	TRUE	0.992039	-0.0300002	NME7
BLZF1	1244	11006	12250	6.88154e+06	0.355155	0	two.sided	FALSE	TRUE	0.551621	0.215291	BLZF1
SLC19A2	1244	11006	12250	6850907	0.778845	0	two.sided	FALSE	TRUE	0.880946	0.126767	SLC19A2
C1orf112	1244	11006	12250	6.87311e+06	0.213187	0	two.sided	FALSE	TRUE	0.396544	0.400956	C1orf112
SELL	1244	11006	12250	6612585	0.00112513	0	two.sided	FALSE	TRUE	0.00648473	-0.462281	SELL
METTL18	1244	11006	12250	6797689	0.227552	0	two.sided	FALSE	TRUE	0.413891	-0.223706	METTL18
SCYL3	1244	11006	12250	6865599	0.571831	0	two.sided	FALSE	TRUE	0.739803	0.144991	SCYL3
KIFAP3	1244	11006	12250	6.8112e+06	0.624364	0	two.sided	FALSE	TRUE	0.779218	-0.0508553	KIFAP3
GORAB	1244	11006	12250	6949654	0.000119492	0	two.sided	FALSE	TRUE	0.000900781	0.950803	GORAB
FMO4	1244	11006	12250	6861996	0.357621	0	two.sided	FALSE	TRUE	0.554212	0.380789	FMO4
PRRC2C	1244	11006	12250	7.52713e+06	2.2407e-09	0	two.sided	FALSE	TRUE	3.9192e-08	0.200752	PRRC2C
VAMP4	1244	11006	12250	6.89949e+06	0.416829	0	two.sided	FALSE	TRUE	0.608127	0.104495	VAMP4
METTL13	1244	11006	12250	6873692	0.398361	0	two.sided	FALSE	TRUE	0.591134	0.184339	METTL13
DNM3	1244	11006	12250	6863628	0.170477	0	two.sided	FALSE	TRUE	0.33975	0.712153	DNM3
PIGC	1244	11006	12250	6709540	0.071917	0	two.sided	FALSE	TRUE	0.18379	-0.184064	PIGC
SUCO	1244	11006	12250	6957803	0.128193	0	two.sided	FALSE	TRUE	0.277551	0.165303	SUCO
FASLG	1244	11006	12250	6.96941e+06	0.00209913	0	two.sided	FALSE	TRUE	0.0110131	0.60082	FASLG
PRDX6	1244	11006	12250	7015130	0.0871107	0	two.sided	FALSE	TRUE	0.211724	0.0906129	PRDX6
KLHL20	1244	11006	12250	6851141	0.920187	0	two.sided	FALSE	TRUE	0.961282	0.0543508	KLHL20
CENPL	1244	11006	12250	6.87167e+06	0.354715	0	two.sided	FALSE	TRUE	0.551235	0.258888	CENPL
DARS2	1244	11006	12250	6846260	0.981126	0	two.sided	FALSE	TRUE	0.990896	0.0773377	DARS2
ZBTB37	1244	11006	12250	6.9395e+06	0.0218915	0	two.sided	FALSE	TRUE	0.0756887	0.452021	ZBTB37
RC3H1	1244	11006	12250	6.99388e+06	0.0883133	0	two.sided	FALSE	TRUE	0.213943	0.149075	RC3H1
AL121983.2	1244	11006	12250	6881037	0.128892	0	two.sided	FALSE	TRUE	0.278649	0.555108	AL121983.2
RABGAP1L	1244	11006	12250	7.27517e+06	1.56332e-05	0	two.sided	FALSE	TRUE	0.000144929	0.23986	RABGAP1L
CACYBP	1244	11006	12250	7.4387e+06	8.19734e-12	0	two.sided	FALSE	TRUE	1.95303e-10	0.565871	CACYBP
MRPS14	1244	11006	12250	6872602	0.554568	0	two.sided	FALSE	TRUE	0.726068	0.121737	MRPS14
KIAA0040	1244	11006	12250	6843477	0.9678	0	two.sided	FALSE	TRUE	0.98434	0.0204202	KIAA0040
COP1	1244	11006	12250	6939159	0.134386	0	two.sided	FALSE	TRUE	0.286644	0.181314	COP1
FAM20B	1244	11006	12250	6865259	0.626544	0	two.sided	FALSE	TRUE	0.780333	0.077057	FAM20B
TOR3A	1244	11006	12250	6759906	0.139776	0	two.sided	FALSE	TRUE	0.294965	-0.231857	TOR3A
ABL2	1244	11006	12250	6853810	0.82025	0	two.sided	FALSE	TRUE	0.907009	0.0575868	ABL2
SOAT1	1244	11006	12250	6982450	0.0254476	0	two.sided	FALSE	TRUE	0.0851541	0.294623	SOAT1
TOR1AIP2	1244	11006	12250	6762616	0.0732672	0	two.sided	FALSE	TRUE	0.186225	-0.364207	TOR1AIP2
AL353708.3	1244	11006	12250	6936395	1.55497e-05	0	two.sided	FALSE	TRUE	0.000144271	1.28053	AL353708.3
TOR1AIP1	1244	11006	12250	7162012	3.49865e-05	0	two.sided	FALSE	TRUE	0.000296132	0.375465	TOR1AIP1
AL353708.1	1244	11006	12250	6881374	0.00686937	0	two.sided	FALSE	TRUE	0.0294922	1.2099	AL353708.1
CEP350	1244	11006	12250	6.85697e+06	0.899746	0	two.sided	FALSE	TRUE	0.950301	0.00838525	CEP350
QSOX1	1244	11006	12250	6695294	0.0030143	0	two.sided	FALSE	TRUE	0.0149029	-0.545339	QSOX1
ACBD6	1244	11006	12250	6715071	0.0866555	0	two.sided	FALSE	TRUE	0.210928	-0.179724	ACBD6
XPR1	1244	11006	12250	6.92482e+06	0.119975	0	two.sided	FALSE	TRUE	0.264657	0.244689	XPR1
STX6	1244	11006	12250	6753631	0.043429	0	two.sided	FALSE	TRUE	0.127793	-0.400814	STX6
MR1	1244	11006	12250	6908380	0.18991	0	two.sided	FALSE	TRUE	0.366068	0.234929	MR1
IER5	1244	11006	12250	7.92207e+06	6.26376e-46	0	two.sided	FALSE	TRUE	8.05868e-44	1.19662	IER5
GLUL	1244	11006	12250	6829066	0.83278	0	two.sided	FALSE	TRUE	0.913573	-0.00657102	GLUL
RNASEL	1244	11006	12250	6811688	0.14681	0	two.sided	FALSE	TRUE	0.30574	-0.667505	RNASEL
NPL	1244	11006	12250	6.81561e+06	0.176674	0	two.sided	FALSE	TRUE	0.348325	-0.553352	NPL
DHX9	1244	11006	12250	6923448	0.334348	0	two.sided	FALSE	TRUE	0.531948	0.0991495	DHX9
SMG7	1244	11006	12250	6.94574e+06	0.159446	0	two.sided	FALSE	TRUE	0.324355	0.141895	SMG7
ARPC5	1244	11006	12250	6.00317e+06	1.00777e-14	0	two.sided	FALSE	TRUE	3.20574e-13	-0.413579	ARPC5
COLGALT2	1244	11006	12250	6775890	0.0719192	0	two.sided	FALSE	TRUE	0.18379	-0.440604	COLGALT2
TSEN15	1244	11006	12250	6760448	0.236044	0	two.sided	FALSE	TRUE	0.422631	-0.125952	TSEN15
C1orf21	1244	11006	12250	6.67093e+06	0.0836197	0	two.sided	FALSE	TRUE	0.205395	-0.110847	C1orf21
EDEM3	1244	11006	12250	6.83845e+06	0.895185	0	two.sided	FALSE	TRUE	0.947126	0.00440055	EDEM3
FAM129A	1244	11006	12250	6.74912e+06	0.231176	0	two.sided	FALSE	TRUE	0.417335	-0.113898	FAM129A
RNF2	1244	11006	12250	6.80167e+06	0.323729	0	two.sided	FALSE	TRUE	0.521332	-0.169226	RNF2
TRMT1L	1244	11006	12250	6922493	0.0138374	0	two.sided	FALSE	TRUE	0.0523776	0.650936	TRMT1L
SWT1	1244	11006	12250	6829349	0.49899	0	two.sided	FALSE	TRUE	0.679421	-0.278806	SWT1
IVNS1ABP	1244	11006	12250	6994592	0.0445187	0	two.sided	FALSE	TRUE	0.129894	0.203155	IVNS1ABP
TPR	1244	11006	12250	6816164	0.771924	0	two.sided	FALSE	TRUE	0.876973	-0.0357043	TPR
ODR4	1244	11006	12250	6.86717e+06	0.623727	0	two.sided	FALSE	TRUE	0.778919	0.0934547	ODR4
RGS1	1244	11006	12250	7.58658e+06	1.00244e-35	0	two.sided	FALSE	TRUE	9.28579e-34	1.5477	RGS1
AL136454.1	1244	11006	12250	6.857e+06	0.683824	0	two.sided	FALSE	TRUE	0.821711	0.110509	AL136454.1
RGS2	1244	11006	12250	7810545	3.91547e-49	0	two.sided	FALSE	TRUE	5.39728e-47	1.46242	RGS2
UCHL5	1244	11006	12250	6670441	0.0181326	0	two.sided	FALSE	TRUE	0.0653056	-0.264378	UCHL5
TROVE2	1244	11006	12250	6862879	0.851547	0	two.sided	FALSE	TRUE	0.923769	0.0163987	TROVE2
GLRX2	1244	11006	12250	6900558	0.151565	0	two.sided	FALSE	TRUE	0.31255	0.260969	GLRX2
CDC73	1244	11006	12250	7.12297e+06	0.00188636	0	two.sided	FALSE	TRUE	0.0100795	0.251418	CDC73
CFH	1244	11006	12250	6848353	0.913638	0	two.sided	FALSE	TRUE	0.956771	0.0124326	CFH
ZBTB41	1244	11006	12250	6.92018e+06	0.0214324	0	two.sided	FALSE	TRUE	0.0743903	0.568509	ZBTB41
DENND1B	1244	11006	12250	6.98828e+06	0.025763	0	two.sided	FALSE	TRUE	0.0856967	0.263753	DENND1B
NEK7	1244	11006	12250	6.90446e+06	0.344458	0	two.sided	FALSE	TRUE	0.541471	0.119715	NEK7
PTPRC	1244	11006	12250	5.47348e+06	1.47396e-31	0	two.sided	FALSE	TRUE	1.15317e-29	-0.172654	PTPRC
MIR181A1HG	1244	11006	12250	7062777	2.36913e-13	0	two.sided	FALSE	TRUE	6.61016e-12	1.48222	MIR181A1HG
ZNF281	1244	11006	12250	6.79354e+06	0.386183	0	two.sided	FALSE	TRUE	0.579901	-0.0796846	ZNF281
DDX59	1244	11006	12250	6856378	0.834221	0	two.sided	FALSE	TRUE	0.914071	0.0158783	DDX59
GPR25	1244	11006	12250	6.80917e+06	0.0561298	0	two.sided	FALSE	TRUE	0.153792	-1.23033	GPR25
KIF21B	1244	11006	12250	6.93586e+06	0.23533	0	two.sided	FALSE	TRUE	0.422071	0.111051	KIF21B
TMEM9	1244	11006	12250	6.83439e+06	0.797301	0	two.sided	FALSE	TRUE	0.893046	-0.0581097	TMEM9
PHLDA3	1244	11006	12250	6826877	0.148703	0	two.sided	FALSE	TRUE	0.308518	-1.44538	PHLDA3
CSRP1	1244	11006	12250	6.78857e+06	0.39953	0	two.sided	FALSE	TRUE	0.592344	-0.114652	CSRP1
AC096677.1	1244	11006	12250	6838510	0.583904	0	two.sided	FALSE	TRUE	0.74931	-0.393971	AC096677.1
IPO9-AS1	1244	11006	12250	6868726	0.214334	0	two.sided	FALSE	TRUE	0.397785	0.588005	IPO9-AS1
IPO9	1244	11006	12250	6.80844e+06	0.473712	0	two.sided	FALSE	TRUE	0.656663	-0.0669753	IPO9
SHISA4	1244	11006	12250	6823570	0.165332	0	two.sided	FALSE	TRUE	0.332589	-1.04123	SHISA4
TIMM17A	1244	11006	12250	6.97004e+06	0.0672213	0	two.sided	FALSE	TRUE	0.175147	0.212065	TIMM17A
RNPEP	1244	11006	12250	6770703	0.220284	0	two.sided	FALSE	TRUE	0.404803	-0.146951	RNPEP
ARL8A	1244	11006	12250	6.71879e+06	0.144996	0	two.sided	FALSE	TRUE	0.303213	-0.122161	ARL8A
PTPN7	1244	11006	12250	7.40475e+06	6.96491e-10	0	two.sided	FALSE	TRUE	1.31561e-08	0.442544	PTPN7
LGR6	1244	11006	12250	6781190	0.239239	0	two.sided	FALSE	TRUE	0.426504	-0.15299	LGR6
UBE2T	1244	11006	12250	6.87365e+06	0.116207	0	two.sided	FALSE	TRUE	0.259361	0.665717	UBE2T
PPP1R12B	1244	11006	12250	6835509	0.788502	0	two.sided	FALSE	TRUE	0.887394	-0.0406557	PPP1R12B
KDM5B	1244	11006	12250	6870206	0.654437	0	two.sided	FALSE	TRUE	0.801992	0.0727436	KDM5B
RABIF	1244	11006	12250	6618540	0.000169662	0	two.sided	FALSE	TRUE	0.00123322	-0.621074	RABIF
KLHL12	1244	11006	12250	6.8657e+06	0.637686	0	two.sided	FALSE	TRUE	0.789623	0.127102	KLHL12
ADIPOR1	1244	11006	12250	6901949	0.48899	0	two.sided	FALSE	TRUE	0.671411	0.0749399	ADIPOR1
CYB5R1	1244	11006	12250	6741609	0.0262793	0	two.sided	FALSE	TRUE	0.0869147	-0.46073	CYB5R1
TMEM183A	1244	11006	12250	7021846	0.0346448	0	two.sided	FALSE	TRUE	0.107548	0.191987	TMEM183A
LINC01136	1244	11006	12250	6.89835e+06	0.000841397	0	two.sided	FALSE	TRUE	0.00505318	1.34003	LINC01136
BTG2	1244	11006	12250	8.6298e+06	7.18864e-80	0	two.sided	FALSE	TRUE	2.13429e-77	1.26952	BTG2
ATP2B4	1244	11006	12250	6600955	0.0124045	0	two.sided	FALSE	TRUE	0.0477659	-0.179161	ATP2B4
LAX1	1244	11006	12250	7.20364e+06	1.41133e-11	0	two.sided	FALSE	TRUE	3.26835e-10	0.841875	LAX1
ZC3H11A	1244	11006	12250	6808795	0.34424	0	two.sided	FALSE	TRUE	0.541202	-0.224709	ZC3H11A
ZBED6	1244	11006	12250	6911482	0.13154	0	two.sided	FALSE	TRUE	0.282213	0.252549	ZBED6
SNRPE	1244	11006	12250	6709609	0.0961443	0	two.sided	FALSE	TRUE	0.22701	-0.16936	SNRPE
SOX13	1244	11006	12250	6.74374e+06	0.0394531	0	two.sided	FALSE	TRUE	0.119027	-0.397638	SOX13
ETNK2	1244	11006	12250	6.85319e+06	0.707067	0	two.sided	FALSE	TRUE	0.835251	0.132875	ETNK2
PPP1R15B	1244	11006	12250	7.34955e+06	5.58374e-17	0	two.sided	FALSE	TRUE	2.1338e-15	0.924121	PPP1R15B
PIK3C2B	1244	11006	12250	6905287	0.0317747	0	two.sided	FALSE	TRUE	0.100305	0.53733	PIK3C2B
MDM4	1244	11006	12250	7228431	8.59525e-06	0	two.sided	FALSE	TRUE	8.39868e-05	0.350018	MDM4
RBBP5	1244	11006	12250	6882960	0.433242	0	two.sided	FALSE	TRUE	0.62255	0.149726	RBBP5
DSTYK	1244	11006	12250	6.91516e+06	0.124542	0	two.sided	FALSE	TRUE	0.27214	0.30762	DSTYK
NUAK2	1244	11006	12250	6868210	0.408507	0	two.sided	FALSE	TRUE	0.600571	0.28324	NUAK2
ELK4	1244	11006	12250	6.86139e+06	0.826685	0	two.sided	FALSE	TRUE	0.910943	0.032633	ELK4
NUCKS1	1244	11006	12250	6932882	0.414308	0	two.sided	FALSE	TRUE	0.606252	0.0315998	NUCKS1
RAB29	1244	11006	12250	6.47612e+06	3.8529e-05	0	two.sided	FALSE	TRUE	0.00032375	-0.348607	RAB29
SLC41A1	1244	11006	12250	6902613	0.171807	0	two.sided	FALSE	TRUE	0.341539	0.256609	SLC41A1
PM20D1	1244	11006	12250	6840281	0.698209	0	two.sided	FALSE	TRUE	0.830719	-0.252471	PM20D1
SRGAP2	1244	11006	12250	6857576	0.668028	0	two.sided	FALSE	TRUE	0.810552	0.0993404	SRGAP2
IKBKE	1244	11006	12250	6981670	0.0183952	0	two.sided	FALSE	TRUE	0.0661073	0.311598	IKBKE
RASSF5	1244	11006	12250	6.86583e+06	0.837344	0	two.sided	FALSE	TRUE	0.91537	-0.00364937	RASSF5
EIF2D	1244	11006	12250	6790658	0.311666	0	two.sided	FALSE	TRUE	0.509642	-0.141628	EIF2D
MAPKAPK2	1244	11006	12250	7156620	0.000746191	0	two.sided	FALSE	TRUE	0.00456185	0.245669	MAPKAPK2
FCMR	1244	11006	12250	6460378	5.3604e-05	0	two.sided	FALSE	TRUE	0.000436178	-0.290335	FCMR
YOD1	1244	11006	12250	6934032	0.00964792	0	two.sided	FALSE	TRUE	0.0389245	0.530452	YOD1
CD55	1244	11006	12250	7.1468e+06	0.000120901	0	two.sided	FALSE	TRUE	0.000910281	0.32766	CD55
CD46	1244	11006	12250	6.69958e+06	0.122349	0	two.sided	FALSE	TRUE	0.268666	-0.107118	CD46
MIR29B2CHG	1244	11006	12250	6987647	8.39704e-06	0	two.sided	FALSE	TRUE	8.21193e-05	0.956453	MIR29B2CHG
AL031316.1	1244	11006	12250	6829990	0.203853	0	two.sided	FALSE	TRUE	0.385311	-1.24673	AL031316.1
TRAF3IP3	1244	11006	12250	6.24917e+06	5.26581e-08	0	two.sided	FALSE	TRUE	7.60259e-07	-0.267277	TRAF3IP3
UTP25	1244	11006	12250	6.78508e+06	0.0928217	0	two.sided	FALSE	TRUE	0.221468	-0.442383	UTP25
HHAT	1244	11006	12250	6866254	0.25328	0	two.sided	FALSE	TRUE	0.442877	0.460179	HHAT
RCOR3	1244	11006	12250	6.99226e+06	0.0237313	0	two.sided	FALSE	TRUE	0.0803701	0.261366	RCOR3
TRAF5	1244	11006	12250	6.98941e+06	0.00697004	0	two.sided	FALSE	TRUE	0.029869	0.384227	TRAF5
LINC00467	1244	11006	12250	6855181	0.613336	0	two.sided	FALSE	TRUE	0.771266	0.235414	LINC00467
SLC30A1	1244	11006	12250	6839027	0.639092	0	two.sided	FALSE	TRUE	0.79035	-0.362837	SLC30A1
LPGAT1	1244	11006	12250	6859115	0.864212	0	two.sided	FALSE	TRUE	0.929347	0.0239028	LPGAT1
INTS7	1244	11006	12250	6806489	0.191802	0	two.sided	FALSE	TRUE	0.368426	-0.396781	INTS7
PPP2R5A	1244	11006	12250	6.77083e+06	0.396925	0	two.sided	FALSE	TRUE	0.590043	-0.0804445	PPP2R5A
TMEM206	1244	11006	12250	6.77543e+06	0.0703433	0	two.sided	FALSE	TRUE	0.18076	-0.426438	TMEM206
NENF	1244	11006	12250	6.68034e+06	0.0628698	0	two.sided	FALSE	TRUE	0.167619	-0.166481	NENF
AC092803.2	1244	11006	12250	6.9525e+06	6.77696e-18	0	two.sided	FALSE	TRUE	2.74372e-16	3.06217	AC092803.2
ATF3	1244	11006	12250	7825385	7.77613e-139	0	two.sided	FALSE	TRUE	5.00221e-136	3.45554	ATF3
NSL1	1244	11006	12250	6.77664e+06	0.276095	0	two.sided	FALSE	TRUE	0.469995	-0.177135	NSL1
TATDN3	1244	11006	12250	6943776	0.0244115	0	two.sided	FALSE	TRUE	0.0821687	0.422391	TATDN3
FLVCR1-DT	1244	11006	12250	6.81481e+06	0.180878	0	two.sided	FALSE	TRUE	0.354021	-0.604099	FLVCR1-DT
FLVCR1	1244	11006	12250	6866600	0.413171	0	two.sided	FALSE	TRUE	0.605354	0.27362	FLVCR1
ANGEL2	1244	11006	12250	6.97909e+06	0.0439436	0	two.sided	FALSE	TRUE	0.128914	0.218394	ANGEL2
RPS6KC1	1244	11006	12250	6.86658e+06	0.657924	0	two.sided	FALSE	TRUE	0.804284	0.0975568	RPS6KC1
SMYD2	1244	11006	12250	6788195	0.314619	0	two.sided	FALSE	TRUE	0.512493	-0.172144	SMYD2
CENPF	1244	11006	12250	6.88069e+06	0.0255293	0	two.sided	FALSE	TRUE	0.085262	1.20234	CENPF
GPATCH2	1244	11006	12250	6.97087e+06	0.00744697	0	two.sided	FALSE	TRUE	0.0315971	0.43811	GPATCH2
RRP15	1244	11006	12250	6.80388e+06	0.339077	0	two.sided	FALSE	TRUE	0.535631	-0.23456	RRP15
LYPLAL1	1244	11006	12250	6924123	0.04964	0	two.sided	FALSE	TRUE	0.140602	0.391697	LYPLAL1
ZC3H11B	1244	11006	12250	6864496	0.277926	0	two.sided	FALSE	TRUE	0.471725	0.473853	ZC3H11B
EPRS	1244	11006	12250	6.65422e+06	0.0132716	0	two.sided	FALSE	TRUE	0.0505168	-0.278314	EPRS
BPNT1	1244	11006	12250	6.75652e+06	0.00422766	0	two.sided	FALSE	TRUE	0.0198589	-1.08058	BPNT1
IARS2	1244	11006	12250	6.65963e+06	0.00748888	0	two.sided	FALSE	TRUE	0.0317633	-0.32982	IARS2
RAB3GAP2	1244	11006	12250	6902469	0.346995	0	two.sided	FALSE	TRUE	0.543959	0.152433	RAB3GAP2
DUSP10	1244	11006	12250	7554828	5.31227e-27	0	two.sided	FALSE	TRUE	3.5351e-25	1.1203	DUSP10
TAF1A	1244	11006	12250	6827249	0.39244	0	two.sided	FALSE	TRUE	0.585802	-0.404614	TAF1A
MIA3	1244	11006	12250	6939392	0.242959	0	two.sided	FALSE	TRUE	0.431211	0.103155	MIA3
AL592148.3	1244	11006	12250	6.84923e+06	0.835235	0	two.sided	FALSE	TRUE	0.914619	0.092439	AL592148.3
AIDA	1244	11006	12250	6.62571e+06	0.000876818	0	two.sided	FALSE	TRUE	0.00523646	-0.448904	AIDA
BROX	1244	11006	12250	7197379	7.63001e-07	0	two.sided	FALSE	TRUE	9.24141e-06	0.500852	BROX
AL392172.1	1244	11006	12250	6839255	0.86264	0	two.sided	FALSE	TRUE	0.928848	-0.0438595	AL392172.1
DISP1	1244	11006	12250	6812996	0.0640824	0	two.sided	FALSE	TRUE	0.169835	-1.33212	DISP1
CAPN2	1244	11006	12250	6.1396e+06	7.40228e-11	0	two.sided	FALSE	TRUE	1.56693e-09	-0.349388	CAPN2
TP53BP2	1244	11006	12250	7.08258e+06	0.000241806	0	two.sided	FALSE	TRUE	0.0016806	0.424055	TP53BP2
FBXO28	1244	11006	12250	6821419	0.687818	0	two.sided	FALSE	TRUE	0.824626	-0.0464504	FBXO28
DEGS1	1244	11006	12250	6.85545e+06	0.87485	0	two.sided	FALSE	TRUE	0.934929	0.0225668	DEGS1
NVL	1244	11006	12250	6.91634e+06	0.122647	0	two.sided	FALSE	TRUE	0.268951	0.268117	NVL
CNIH4	1244	11006	12250	6.82972e+06	0.803654	0	two.sided	FALSE	TRUE	0.896469	-0.00105014	CNIH4
WDR26	1244	11006	12250	7196865	5.19984e-08	0	two.sided	FALSE	TRUE	7.51672e-07	0.575125	WDR26
CNIH3	1244	11006	12250	6.85065e+06	0.732753	0	two.sided	FALSE	TRUE	0.852889	0.147571	CNIH3
LBR	1244	11006	12250	6695020	0.097065	0	two.sided	FALSE	TRUE	0.228206	-0.150407	LBR
SRP9	1244	11006	12250	6709487	0.179972	0	two.sided	FALSE	TRUE	0.352701	-0.0815986	SRP9
TMEM63A	1244	11006	12250	6873501	0.53145	0	two.sided	FALSE	TRUE	0.705147	0.112399	TMEM63A
PYCR2	1244	11006	12250	6.82878e+06	0.649928	0	two.sided	FALSE	TRUE	0.798325	-0.0554109	PYCR2
SDE2	1244	11006	12250	7036221	0.0113337	0	two.sided	FALSE	TRUE	0.0443354	0.240471	SDE2
H3F3A	1244	11006	12250	4512874	1.48882e-88	0	two.sided	FALSE	TRUE	4.78863e-86	-0.444682	H3F3A
ACBD3	1244	11006	12250	6771475	0.338593	0	two.sided	FALSE	TRUE	0.535053	-0.0465561	ACBD3
ACBD3-AS1	1244	11006	12250	6817551	0.0581934	0	two.sided	FALSE	TRUE	0.158248	-1.75699	ACBD3-AS1
LIN9	1244	11006	12250	6.84598e+06	0.989705	0	two.sided	FALSE	TRUE	0.99527	0.0782542	LIN9
PARP1	1244	11006	12250	6200872	3.44841e-13	0	two.sided	FALSE	TRUE	9.39508e-12	-0.679955	PARP1
ITPKB	1244	11006	12250	6910770	0.341694	0	two.sided	FALSE	TRUE	0.538579	0.115236	ITPKB
PSEN2	1244	11006	12250	6.86085e+06	0.370898	0	two.sided	FALSE	TRUE	0.565678	0.395873	PSEN2
COQ8A	1244	11006	12250	6.9087e+06	0.2276	0	two.sided	FALSE	TRUE	0.413912	0.192393	COQ8A
ZNF678	1244	11006	12250	6808890	0.329915	0	two.sided	FALSE	TRUE	0.527199	-0.261028	ZNF678
SNAP47	1244	11006	12250	6.85378e+06	0.891438	0	two.sided	FALSE	TRUE	0.944489	-0.00861657	SNAP47
JMJD4	1244	11006	12250	6814141	0.414161	0	two.sided	FALSE	TRUE	0.60619	-0.218656	JMJD4
ARF1	1244	11006	12250	6.43402e+06	0.000311039	0	two.sided	FALSE	TRUE	0.00210615	-0.119715	ARF1
C1orf35	1244	11006	12250	6.86873e+06	0.722447	0	two.sided	FALSE	TRUE	0.845725	0.0247329	C1orf35
MRPL55	1244	11006	12250	6748041	0.214683	0	two.sided	FALSE	TRUE	0.398214	-0.130259	MRPL55
GUK1	1244	11006	12250	6591620	0.0269607	0	two.sided	FALSE	TRUE	0.0885861	-0.0697594	GUK1
IBA57	1244	11006	12250	6863730	0.523431	0	two.sided	FALSE	TRUE	0.698652	0.19269	IBA57
OBSCN	1244	11006	12250	6836111	0.62464	0	two.sided	FALSE	TRUE	0.779218	-0.172648	OBSCN
TRIM11	1244	11006	12250	6844542	0.985035	0	two.sided	FALSE	TRUE	0.992813	0.0205271	TRIM11
TRIM17	1244	11006	12250	6831763	0.294085	0	two.sided	FALSE	TRUE	0.489888	-0.8467	TRIM17
HIST3H2A	1244	11006	12250	7094226	3.93075e-05	0	two.sided	FALSE	TRUE	0.000329574	0.503266	HIST3H2A
RNF187	1244	11006	12250	6393544	3.66691e-07	0	two.sided	FALSE	TRUE	4.70201e-06	-0.454876	RNF187
RHOU	1244	11006	12250	6937735	0.000166584	0	two.sided	FALSE	TRUE	0.00121465	0.994541	RHOU
RAB4A	1244	11006	12250	6.75003e+06	0.241872	0	two.sided	FALSE	TRUE	0.430092	-0.0961352	RAB4A
CCSAP	1244	11006	12250	6.92029e+06	0.029518	0	two.sided	FALSE	TRUE	0.0947047	0.500947	CCSAP
NUP133	1244	11006	12250	6.87903e+06	0.634515	0	two.sided	FALSE	TRUE	0.787212	0.0636438	NUP133
ABCB10	1244	11006	12250	6815569	0.429653	0	two.sided	FALSE	TRUE	0.6197	-0.207553	ABCB10
TAF5L	1244	11006	12250	6.83387e+06	0.781911	0	two.sided	FALSE	TRUE	0.882861	-0.0132824	TAF5L
URB2	1244	11006	12250	6793639	0.0405553	0	two.sided	FALSE	TRUE	0.121372	-0.924139	URB2
GALNT2	1244	11006	12250	6.87253e+06	0.597709	0	two.sided	FALSE	TRUE	0.759034	0.118748	GALNT2
COG2	1244	11006	12250	6767966	0.116807	0	two.sided	FALSE	TRUE	0.260247	-0.259114	COG2
C1orf198	1244	11006	12250	6840990	0.708009	0	two.sided	FALSE	TRUE	0.835766	-0.343815	C1orf198
TTC13	1244	11006	12250	6.79797e+06	0.401638	0	two.sided	FALSE	TRUE	0.594252	-0.101965	TTC13
ARV1	1244	11006	12250	6778949	0.0902009	0	two.sided	FALSE	TRUE	0.217184	-0.390576	ARV1
FAM89A	1244	11006	12250	6798908	0.0401427	0	two.sided	FALSE	TRUE	0.1204	-1.08267	FAM89A
C1orf131	1244	11006	12250	6.81957e+06	0.62213	0	two.sided	FALSE	TRUE	0.777847	-0.0994717	C1orf131
GNPAT	1244	11006	12250	6.79696e+06	0.480704	0	two.sided	FALSE	TRUE	0.663221	-0.114189	GNPAT
EXOC8	1244	11006	12250	6840501	0.933641	0	two.sided	FALSE	TRUE	0.967892	-0.00839548	EXOC8
SPRTN	1244	11006	12250	6801264	0.504636	0	two.sided	FALSE	TRUE	0.683253	-0.0613481	SPRTN
EGLN1	1244	11006	12250	6683527	0.016361	0	two.sided	FALSE	TRUE	0.060371	-0.304005	EGLN1
AL445524.1	1244	11006	12250	6.83491e+06	0.568345	0	two.sided	FALSE	TRUE	0.737348	-0.311104	AL445524.1
TSNAX	1244	11006	12250	6827663	0.512027	0	two.sided	FALSE	TRUE	0.689631	-0.216395	TSNAX
DISC1	1244	11006	12250	6890232	0.00924947	0	two.sided	FALSE	TRUE	0.0377111	0.987941	DISC1
NTPCR	1244	11006	12250	6.8107e+06	0.460263	0	two.sided	FALSE	TRUE	0.645815	-0.124146	NTPCR
PCNX2	1244	11006	12250	6.78915e+06	0.291904	0	two.sided	FALSE	TRUE	0.487326	-0.15811	PCNX2
AL355472.1	1244	11006	12250	6879540	0.499772	0	two.sided	FALSE	TRUE	0.680089	0.109311	AL355472.1
COA6	1244	11006	12250	6821084	0.669175	0	two.sided	FALSE	TRUE	0.811573	-0.0628588	COA6
TARBP1	1244	11006	12250	6.86866e+06	0.541585	0	two.sided	FALSE	TRUE	0.713913	0.193293	TARBP1
IRF2BP2	1244	11006	12250	7.01668e+06	0.0404725	0	two.sided	FALSE	TRUE	0.121187	0.175183	IRF2BP2
AL160408.2	1244	11006	12250	6.87064e+06	0.263879	0	two.sided	FALSE	TRUE	0.455426	0.36953	AL160408.2
TOMM20	1244	11006	12250	6828266	0.871754	0	two.sided	FALSE	TRUE	0.933652	-0.00887242	TOMM20
RBM34	1244	11006	12250	7.02403e+06	0.0110201	0	two.sided	FALSE	TRUE	0.0432987	0.248755	RBM34
ARID4B	1244	11006	12250	7.9643e+06	4.52758e-25	0	two.sided	FALSE	TRUE	2.70231e-23	0.450292	ARID4B
GGPS1	1244	11006	12250	6841577	0.833371	0	two.sided	FALSE	TRUE	0.913714	-0.0942879	GGPS1
TBCE	1244	11006	12250	6890874	0.0119711	0	two.sided	FALSE	TRUE	0.0463901	1.05568	TBCE
TBCE.1	1244	11006	12250	6858751	0.308865	0	two.sided	FALSE	TRUE	0.506442	0.57674	TBCE.1
B3GALNT2	1244	11006	12250	6846339	0.980677	0	two.sided	FALSE	TRUE	0.990687	-0.0301346	B3GALNT2
LYST	1244	11006	12250	6.91518e+06	0.451108	0	two.sided	FALSE	TRUE	0.637464	0.0963508	LYST
GPR137B	1244	11006	12250	6849357	0.956617	0	two.sided	FALSE	TRUE	0.979517	0.0124759	GPR137B
ERO1B	1244	11006	12250	7026651	0.00329787	0	two.sided	FALSE	TRUE	0.0160648	0.359811	ERO1B
EDARADD	1244	11006	12250	6.88877e+06	0.227772	0	two.sided	FALSE	TRUE	0.413966	0.27964	EDARADD
LGALS8	1244	11006	12250	6.90868e+06	0.319279	0	two.sided	FALSE	TRUE	0.516204	0.108904	LGALS8
HEATR1	1244	11006	12250	6822190	0.68205	0	two.sided	FALSE	TRUE	0.820685	-0.0377793	HEATR1
MTR	1244	11006	12250	6919678	0.235903	0	two.sided	FALSE	TRUE	0.422579	0.126669	MTR
CHRM3-AS2	1244	11006	12250	6841990	0.869739	0	two.sided	FALSE	TRUE	0.932427	0.0620793	CHRM3-AS2
FH	1244	11006	12250	6827921	0.679676	0	two.sided	FALSE	TRUE	0.819276	-0.091122	FH
KMO	1244	11006	12250	6825353	0.222304	0	two.sided	FALSE	TRUE	0.407094	-0.778197	KMO
OPN3	1244	11006	12250	6.83845e+06	0.718088	0	two.sided	FALSE	TRUE	0.842256	-0.183751	OPN3
CHML	1244	11006	12250	6852531	0.628646	0	two.sided	FALSE	TRUE	0.781773	0.272452	CHML
CEP170	1244	11006	12250	6890568	0.17114	0	two.sided	FALSE	TRUE	0.340427	0.338008	CEP170
SDCCAG8	1244	11006	12250	6.88684e+06	0.422213	0	two.sided	FALSE	TRUE	0.612555	0.130583	SDCCAG8
AKT3	1244	11006	12250	7.18688e+06	6.30057e-08	0	two.sided	FALSE	TRUE	9.029e-07	0.597717	AKT3
ZBTB18	1244	11006	12250	6870608	0.150317	0	two.sided	FALSE	TRUE	0.310864	0.576858	ZBTB18
ADSS	1244	11006	12250	7.00096e+06	0.0806052	0	two.sided	FALSE	TRUE	0.199856	0.11908	ADSS
DESI2	1244	11006	12250	7036327	0.00320977	0	two.sided	FALSE	TRUE	0.0157084	0.314112	DESI2
COX20	1244	11006	12250	6461077	1.86073e-06	0	two.sided	FALSE	TRUE	2.08975e-05	-0.53648	COX20
HNRNPU	1244	11006	12250	7.09365e+06	0.0307543	0	two.sided	FALSE	TRUE	0.0978845	0.0710086	HNRNPU
AL356512.1	1244	11006	12250	6.95162e+06	7.92418e-05	0	two.sided	FALSE	TRUE	0.000625881	1.0012	AL356512.1
EFCAB2	1244	11006	12250	6.83281e+06	0.752755	0	two.sided	FALSE	TRUE	0.865642	-0.0761516	EFCAB2
SMYD3	1244	11006	12250	6.86169e+06	0.780399	0	two.sided	FALSE	TRUE	0.882063	0.0254628	SMYD3
TFB2M	1244	11006	12250	6765932	0.124993	0	two.sided	FALSE	TRUE	0.272919	-0.221675	TFB2M
CNST	1244	11006	12250	6.98097e+06	0.116497	0	two.sided	FALSE	TRUE	0.259857	0.140347	CNST
SCCPDH	1244	11006	12250	6748588	0.0751874	0	two.sided	FALSE	TRUE	0.190211	-0.30084	SCCPDH
AHCTF1	1244	11006	12250	7002596	0.00829281	0	two.sided	FALSE	TRUE	0.034528	0.322503	AHCTF1
ZNF669	1244	11006	12250	6814079	0.448662	0	two.sided	FALSE	TRUE	0.635714	-0.176862	ZNF669
ZNF124	1244	11006	12250	6822756	0.455156	0	two.sided	FALSE	TRUE	0.640681	-0.240046	ZNF124
AL390728.6	1244	11006	12250	6825991	0.555618	0	two.sided	FALSE	TRUE	0.726303	-0.157462	AL390728.6
AL390728.5	1244	11006	12250	6948578	0.000105216	0	two.sided	FALSE	TRUE	0.000800456	0.989468	AL390728.5
ZNF496	1244	11006	12250	6845823	0.998046	0	two.sided	FALSE	TRUE	0.999065	-0.0284588	ZNF496
SH3BP5L	1244	11006	12250	6.78355e+06	0.0483441	0	two.sided	FALSE	TRUE	0.137672	-0.627723	SH3BP5L
ZNF672	1244	11006	12250	6850074	0.904702	0	two.sided	FALSE	TRUE	0.952363	0.043938	ZNF672
ZNF692	1244	11006	12250	6782382	0.133521	0	two.sided	FALSE	TRUE	0.285405	-0.315498	ZNF692
PGBD2	1244	11006	12250	6833571	0.543192	0	two.sided	FALSE	TRUE	0.714903	-0.306041	PGBD2
SH3YL1	1244	11006	12250	6.79276e+06	0.131183	0	two.sided	FALSE	TRUE	0.281864	-0.387615	SH3YL1
ACP1	1244	11006	12250	6.74318e+06	0.294858	0	two.sided	FALSE	TRUE	0.49061	-0.0682476	ACP1
TMEM18	1244	11006	12250	6.96949e+06	0.0428215	0	two.sided	FALSE	TRUE	0.126528	0.305522	TMEM18
EIPR1	1244	11006	12250	6764699	0.131159	0	two.sided	FALSE	TRUE	0.281864	-0.23654	EIPR1
TRAPPC12	1244	11006	12250	6.69761e+06	0.00779637	0	two.sided	FALSE	TRUE	0.0328389	-0.464851	TRAPPC12
ADI1	1244	11006	12250	6723347	0.0264072	0	two.sided	FALSE	TRUE	0.0871881	-0.394304	ADI1
RNASEH1	1244	11006	12250	6.76277e+06	0.247154	0	two.sided	FALSE	TRUE	0.43625	-0.130693	RNASEH1
RNASEH1-AS1	1244	11006	12250	6779589	0.0234068	0	two.sided	FALSE	TRUE	0.0796584	-0.857564	RNASEH1-AS1
RPS7	1244	11006	12250	6060592	2.85836e-11	0	two.sided	FALSE	TRUE	6.3404e-10	-0.042673	RPS7
CMPK2	1244	11006	12250	6.86859e+06	0.340093	0	two.sided	FALSE	TRUE	0.536869	0.29865	CMPK2
RSAD2	1244	11006	12250	6882330	0.0255689	0	two.sided	FALSE	TRUE	0.0853205	0.873043	RSAD2
RNF144A	1244	11006	12250	6919430	0.093592	0	two.sided	FALSE	TRUE	0.222892	0.355825	RNF144A
LINC01871	1244	11006	12250	6.70911e+06	0.0868532	0	two.sided	FALSE	TRUE	0.21132	-0.164163	LINC01871
LINC00299	1244	11006	12250	6851936	0.829025	0	two.sided	FALSE	TRUE	0.912479	0.0471749	LINC00299
ID2	1244	11006	12250	7836264	5.14828e-20	0	two.sided	FALSE	TRUE	2.43314e-18	0.512138	ID2
KIDINS220	1244	11006	12250	6827148	0.79215	0	two.sided	FALSE	TRUE	0.889581	-0.0439422	KIDINS220
ITGB1BP1	1244	11006	12250	6.39895e+06	3.32813e-07	0	two.sided	FALSE	TRUE	4.29593e-06	-0.454078	ITGB1BP1
CPSF3	1244	11006	12250	6832391	0.770043	0	two.sided	FALSE	TRUE	0.875503	-0.0527168	CPSF3
IAH1	1244	11006	12250	6.63215e+06	0.0041579	0	two.sided	FALSE	TRUE	0.0195709	-0.34271	IAH1
ADAM17	1244	11006	12250	7128414	1.76622e-06	0	two.sided	FALSE	TRUE	1.98746e-05	0.578219	ADAM17
AC073195.1	1244	11006	12250	6931179	3.15553e-06	0	two.sided	FALSE	TRUE	3.38001e-05	1.49767	AC073195.1
YWHAQ	1244	11006	12250	6.46225e+06	0.000702858	0	two.sided	FALSE	TRUE	0.00431516	-0.131818	YWHAQ
TAF1B	1244	11006	12250	6.65615e+06	0.000590391	0	two.sided	FALSE	TRUE	0.00369521	-0.58929	TAF1B
AC010969.2	1244	11006	12250	6828028	0.207887	0	two.sided	FALSE	TRUE	0.39007	-1.03792	AC010969.2
AC104794.2	1244	11006	12250	6856864	0.65054	0	two.sided	FALSE	TRUE	0.798703	0.137149	AC104794.2
KLF11	1244	11006	12250	6.84177e+06	0.937337	0	two.sided	FALSE	TRUE	0.969165	-0.0280455	KLF11
RRM2	1244	11006	12250	6874662	0.1696	0	two.sided	FALSE	TRUE	0.338411	0.628132	RRM2
HPCAL1	1244	11006	12250	6.70167e+06	0.0153579	0	two.sided	FALSE	TRUE	0.0572533	-0.361664	HPCAL1
ODC1	1244	11006	12250	7.48624e+06	5.2141e-11	0	two.sided	FALSE	TRUE	1.1306e-09	0.4431	ODC1
AC007249.2	1244	11006	12250	6895933	0.000887657	0	two.sided	FALSE	TRUE	0.00528985	1.32545	AC007249.2
NOL10	1244	11006	12250	6933124	0.0632783	0	two.sided	FALSE	TRUE	0.168514	0.270945	NOL10
ATP6V1C2	1244	11006	12250	6843386	0.861463	0	two.sided	FALSE	TRUE	0.92847	-0.14752	ATP6V1C2
PDIA6	1244	11006	12250	6213465	7.45706e-10	0	two.sided	FALSE	TRUE	1.40171e-08	-0.389905	PDIA6
PQLC3	1244	11006	12250	6407417	1.61341e-08	0	two.sided	FALSE	TRUE	2.51436e-07	-0.652662	PQLC3
ROCK2	1244	11006	12250	6712181	0.00816081	0	two.sided	FALSE	TRUE	0.0340519	-0.486626	ROCK2
E2F6	1244	11006	12250	6815437	0.260993	0	two.sided	FALSE	TRUE	0.452197	-0.433516	E2F6
LPIN1	1244	11006	12250	7086837	0.00100573	0	two.sided	FALSE	TRUE	0.00586961	0.324193	LPIN1
TRIB2	1244	11006	12250	6835190	0.844637	0	two.sided	FALSE	TRUE	0.919783	-0.0299479	TRIB2
NBAS	1244	11006	12250	6889620	0.456858	0	two.sided	FALSE	TRUE	0.642327	0.0726533	NBAS
DDX1	1244	11006	12250	6.78593e+06	0.279997	0	two.sided	FALSE	TRUE	0.474301	-0.176876	DDX1
FAM49A	1244	11006	12250	6923828	0.0527871	0	two.sided	FALSE	TRUE	0.147211	0.371898	FAM49A
SMC6	1244	11006	12250	6781447	0.221507	0	two.sided	FALSE	TRUE	0.406253	-0.242649	SMC6
GEN1	1244	11006	12250	6.85736e+06	0.577984	0	two.sided	FALSE	TRUE	0.745348	0.209153	GEN1
RDH14	1244	11006	12250	6.78242e+06	0.236088	0	two.sided	FALSE	TRUE	0.422645	-0.180692	RDH14
LINC00954	1244	11006	12250	6779531	0.00979637	0	two.sided	FALSE	TRUE	0.0393862	-1.24954	LINC00954
TTC32	1244	11006	12250	6.95323e+06	0.0488435	0	two.sided	FALSE	TRUE	0.138822	0.287324	TTC32
AC013400.1	1244	11006	12250	6851188	0.723758	0	two.sided	FALSE	TRUE	0.846812	0.17335	AC013400.1
WDR35	1244	11006	12250	6845601	0.996689	0	two.sided	FALSE	TRUE	0.998869	0.0397557	WDR35
LAPTM4A	1244	11006	12250	6.58978e+06	0.00550668	0	two.sided	FALSE	TRUE	0.0245967	-0.225615	LAPTM4A
PUM2	1244	11006	12250	7.116e+06	0.00151147	0	two.sided	FALSE	TRUE	0.00832999	0.256896	PUM2
RHOB	1244	11006	12250	9.68061e+06	0	0	two.sided	FALSE	TRUE	0	2.98206	RHOB
HS1BP3	1244	11006	12250	6859600	0.763739	0	two.sided	FALSE	TRUE	0.872468	0.0487924	HS1BP3
LDAH	1244	11006	12250	6849067	0.914704	0	two.sided	FALSE	TRUE	0.957412	0.0222135	LDAH
ATAD2B	1244	11006	12250	7016302	0.0163128	0	two.sided	FALSE	TRUE	0.0602697	0.246033	ATAD2B
UBXN2A	1244	11006	12250	6835840	0.868298	0	two.sided	FALSE	TRUE	0.931877	-0.0350744	UBXN2A
WDCP	1244	11006	12250	6873530	0.234716	0	two.sided	FALSE	TRUE	0.421361	0.359038	WDCP
FKBP1B	1244	11006	12250	6765550	0.00534133	0	two.sided	FALSE	TRUE	0.024009	-1.1703	FKBP1B
SF3B6	1244	11006	12250	6.56572e+06	0.00629398	0	two.sided	FALSE	TRUE	0.0274761	-0.151476	SF3B6
FAM228B	1244	11006	12250	6816145	0.589322	0	two.sided	FALSE	TRUE	0.753923	-0.110586	FAM228B
ITSN2	1244	11006	12250	7.19877e+06	0.000263369	0	two.sided	FALSE	TRUE	0.00181305	0.213098	ITSN2
NCOA1	1244	11006	12250	6.8726e+06	0.687401	0	two.sided	FALSE	TRUE	0.824298	0.0670269	NCOA1
PTRHD1	1244	11006	12250	6773249	0.385235	0	two.sided	FALSE	TRUE	0.579126	-0.0882123	PTRHD1
CENPO	1244	11006	12250	6840774	0.850306	0	two.sided	FALSE	TRUE	0.923091	-0.0435817	CENPO
DNAJC27	1244	11006	12250	6965887	0.00319351	0	two.sided	FALSE	TRUE	0.0156469	0.527911	DNAJC27
DNAJC27-AS1	1244	11006	12250	6874975	0.0780734	0	two.sided	FALSE	TRUE	0.195378	0.744689	DNAJC27-AS1
POMC	1244	11006	12250	6.81284e+06	0.46575	0	two.sided	FALSE	TRUE	0.649906	-0.0787488	POMC
DNMT3A	1244	11006	12250	6907462	0.149315	0	two.sided	FALSE	TRUE	0.309244	0.276756	DNMT3A
DTNB	1244	11006	12250	6845840	0.998116	0	two.sided	FALSE	TRUE	0.999065	-0.0240764	DTNB
ASXL2	1244	11006	12250	6.82943e+06	0.791711	0	two.sided	FALSE	TRUE	0.88954	-0.0294159	ASXL2
KIF3C	1244	11006	12250	6816541	0.123784	0	two.sided	FALSE	TRUE	0.270738	-0.92436	KIF3C
RAB10	1244	11006	12250	6949723	0.160487	0	two.sided	FALSE	TRUE	0.326014	0.137376	RAB10
GAREM2	1244	11006	12250	6834702	0.658757	0	two.sided	FALSE	TRUE	0.804614	-0.206967	GAREM2
HADHA	1244	11006	12250	6.78814e+06	0.542235	0	two.sided	FALSE	TRUE	0.714283	-0.0507778	HADHA
HADHB	1244	11006	12250	6.7275e+06	0.0605261	0	two.sided	FALSE	TRUE	0.16308	-0.238122	HADHB
ADGRF3	1244	11006	12250	6844127	0.893368	0	two.sided	FALSE	TRUE	0.945549	0.298045	ADGRF3
SELENOI	1244	11006	12250	6950090	0.027195	0	two.sided	FALSE	TRUE	0.0891286	0.391129	SELENOI
OTOF	1244	11006	12250	6.83637e+06	0.57962	0	two.sided	FALSE	TRUE	0.746128	-0.212542	OTOF
SLC35F6	1244	11006	12250	6890655	0.252947	0	two.sided	FALSE	TRUE	0.442654	0.21255	SLC35F6
MAPRE3	1244	11006	12250	6869454	0.150389	0	two.sided	FALSE	TRUE	0.310956	0.594917	MAPRE3
TMEM214	1244	11006	12250	6767115	0.11744	0	two.sided	FALSE	TRUE	0.261154	-0.263749	TMEM214
AGBL5	1244	11006	12250	6854969	0.729439	0	two.sided	FALSE	TRUE	0.851	0.189011	AGBL5
OST4	1244	11006	12250	6.26758e+06	4.5813e-07	0	two.sided	FALSE	TRUE	5.78483e-06	-0.172089	OST4
KHK	1244	11006	12250	6835736	0.661311	0	two.sided	FALSE	TRUE	0.806203	-0.139914	KHK
ABHD1	1244	11006	12250	6858644	0.358356	0	two.sided	FALSE	TRUE	0.55503	0.44002	ABHD1
PREB	1244	11006	12250	6.73019e+06	0.0423534	0	two.sided	FALSE	TRUE	0.125449	-0.308912	PREB
SLC5A6	1244	11006	12250	6865332	0.628596	0	two.sided	FALSE	TRUE	0.781773	0.0862064	SLC5A6
ATRAID	1244	11006	12250	6.46594e+06	8.58102e-05	0	two.sided	FALSE	TRUE	0.000669601	-0.285256	ATRAID
CAD	1244	11006	12250	6815578	0.358811	0	two.sided	FALSE	TRUE	0.555435	-0.284616	CAD
MPV17	1244	11006	12250	6.63165e+06	0.00150119	0	two.sided	FALSE	TRUE	0.00828124	-0.417754	MPV17
GTF3C2	1244	11006	12250	6799031	0.359621	0	two.sided	FALSE	TRUE	0.556171	-0.167616	GTF3C2
AC074117.1	1244	11006	12250	6829800	0.284222	0	two.sided	FALSE	TRUE	0.478361	-0.772679	AC074117.1
EIF2B4	1244	11006	12250	6855492	0.84572	0	two.sided	FALSE	TRUE	0.920183	0.0833116	EIF2B4
SNX17	1244	11006	12250	6463615	2.87353e-05	0	two.sided	FALSE	TRUE	0.000249233	-0.360694	SNX17
ZNF513	1244	11006	12250	6861609	0.672867	0	two.sided	FALSE	TRUE	0.814205	0.122972	ZNF513
PPM1G	1244	11006	12250	6659265	0.0625351	0	two.sided	FALSE	TRUE	0.167073	-0.107413	PPM1G
NRBP1	1244	11006	12250	7020934	0.0544934	0	two.sided	FALSE	TRUE	0.150607	0.131554	NRBP1
IFT172	1244	11006	12250	6807402	0.16698	0	two.sided	FALSE	TRUE	0.334856	-0.498721	IFT172
ZNF512	1244	11006	12250	6.78441e+06	0.185059	0	two.sided	FALSE	TRUE	0.359712	-0.229797	ZNF512
GPN1	1244	11006	12250	6.72509e+06	0.0270356	0	two.sided	FALSE	TRUE	0.0888072	-0.370512	GPN1
SUPT7L	1244	11006	12250	7068796	0.00113914	0	two.sided	FALSE	TRUE	0.00654923	0.331315	SUPT7L
SLC4A1AP	1244	11006	12250	6.90896e+06	0.337943	0	two.sided	FALSE	TRUE	0.534642	0.0924569	SLC4A1AP
MRPL33	1244	11006	12250	6.53501e+06	0.000554396	0	two.sided	FALSE	TRUE	0.00349638	-0.295342	MRPL33
RBKS	1244	11006	12250	6.88741e+06	0.186446	0	two.sided	FALSE	TRUE	0.361319	0.443042	RBKS
BABAM2	1244	11006	12250	6908837	0.267119	0	two.sided	FALSE	TRUE	0.459443	0.146287	BABAM2
AC093690.1	1244	11006	12250	6845257	0.971008	0	two.sided	FALSE	TRUE	0.985477	-0.0238446	AC093690.1
FOSL2	1244	11006	12250	6865779	0.818428	0	two.sided	FALSE	TRUE	0.905982	0.0414674	FOSL2
PPP1CB	1244	11006	12250	6989095	0.0636953	0	two.sided	FALSE	TRUE	0.169352	0.178155	PPP1CB
TRMT61B	1244	11006	12250	6926522	0.159381	0	two.sided	FALSE	TRUE	0.324337	0.194283	TRMT61B
WDR43	1244	11006	12250	6781108	0.366577	0	two.sided	FALSE	TRUE	0.562361	-0.122978	WDR43
TOGARAM2	1244	11006	12250	6851162	0.869153	0	two.sided	FALSE	TRUE	0.932185	0.0348228	TOGARAM2
CLIP4	1244	11006	12250	6.92539e+06	0.180554	0	two.sided	FALSE	TRUE	0.353626	0.146002	CLIP4
YPEL5	1244	11006	12250	7502542	3.13426e-11	0	two.sided	FALSE	TRUE	6.93913e-10	0.421382	YPEL5
LBH	1244	11006	12250	6.79411e+06	0.624603	0	two.sided	FALSE	TRUE	0.779218	0.00535009	LBH
LCLAT1	1244	11006	12250	6901717	0.129406	0	two.sided	FALSE	TRUE	0.279499	0.307652	LCLAT1
EHD3	1244	11006	12250	6811756	0.0572566	0	two.sided	FALSE	TRUE	0.156214	-1.34493	EHD3
MEMO1	1244	11006	12250	6798446	0.276149	0	two.sided	FALSE	TRUE	0.470018	-0.233312	MEMO1
DPY30	1244	11006	12250	6820082	0.692046	0	two.sided	FALSE	TRUE	0.826614	-0.0600648	DPY30
SPAST	1244	11006	12250	6871335	0.58714	0	two.sided	FALSE	TRUE	0.752129	0.108138	SPAST
AL121658.1	1244	11006	12250	6.84634e+06	0.9765	0	two.sided	FALSE	TRUE	0.988332	-0.00913207	AL121658.1
SLC30A6	1244	11006	12250	6838922	0.846933	0	two.sided	FALSE	TRUE	0.921157	-0.0706145	SLC30A6
YIPF4	1244	11006	12250	6.96403e+06	0.0693055	0	two.sided	FALSE	TRUE	0.178648	0.212085	YIPF4
BIRC6	1244	11006	12250	6.91693e+06	0.436382	0	two.sided	FALSE	TRUE	0.625277	0.0745487	BIRC6
TTC27	1244	11006	12250	6768506	0.0447622	0	two.sided	FALSE	TRUE	0.130423	-0.518625	TTC27
FAM98A	1244	11006	12250	6832283	0.736035	0	two.sided	FALSE	TRUE	0.855077	-0.0821822	FAM98A
CRIM1	1244	11006	12250	6.83648e+06	0.770101	0	two.sided	FALSE	TRUE	0.875503	-0.142437	CRIM1
FEZ2	1244	11006	12250	6.80319e+06	0.420917	0	two.sided	FALSE	TRUE	0.611803	-0.074845	FEZ2
STRN	1244	11006	12250	6760045	0.236808	0	two.sided	FALSE	TRUE	0.42341	-0.109038	STRN
HEATR5B	1244	11006	12250	6854593	0.847489	0	two.sided	FALSE	TRUE	0.921415	0.0259219	HEATR5B
GPATCH11	1244	11006	12250	6.83337e+06	0.786244	0	two.sided	FALSE	TRUE	0.885681	-0.064129	GPATCH11
EIF2AK2	1244	11006	12250	7157348	3.94868e-05	0	two.sided	FALSE	TRUE	0.000330837	0.372637	EIF2AK2
CEBPZOS	1244	11006	12250	6707027	0.0657646	0	two.sided	FALSE	TRUE	0.172869	-0.197828	CEBPZOS
CEBPZ	1244	11006	12250	6652428	0.0265468	0	two.sided	FALSE	TRUE	0.0874495	-0.177477	CEBPZ
NDUFAF7	1244	11006	12250	6863940	0.670602	0	two.sided	FALSE	TRUE	0.812583	0.0627932	NDUFAF7
PRKD3	1244	11006	12250	6.84573e+06	1	0	two.sided	FALSE	TRUE	1	-0.00943908	PRKD3
AC006369.1	1244	11006	12250	6.76007e+06	0.0878608	0	two.sided	FALSE	TRUE	0.213106	-0.346426	AC006369.1
CDC42EP3	1244	11006	12250	7512279	2.99763e-13	0	two.sided	FALSE	TRUE	8.26418e-12	0.500366	CDC42EP3
RMDN2	1244	11006	12250	6.85694e+06	0.648212	0	two.sided	FALSE	TRUE	0.797201	0.178376	RMDN2
ATL2	1244	11006	12250	6.82285e+06	0.564683	0	two.sided	FALSE	TRUE	0.733826	-0.12425	ATL2
HNRNPLL	1244	11006	12250	7.1699e+06	2.93791e-07	0	two.sided	FALSE	TRUE	3.82656e-06	0.612633	HNRNPLL
GALM	1244	11006	12250	6.83142e+06	0.777134	0	two.sided	FALSE	TRUE	0.880369	-0.0793934	GALM
SRSF7	1244	11006	12250	8243888	1.70612e-34	0	two.sided	FALSE	TRUE	1.4966e-32	0.436882	SRSF7
GEMIN6	1244	11006	12250	6853315	0.790998	0	two.sided	FALSE	TRUE	0.889134	0.105834	GEMIN6
DHX57	1244	11006	12250	6869661	0.508307	0	two.sided	FALSE	TRUE	0.686378	0.184815	DHX57
MORN2	1244	11006	12250	6856523	0.631843	0	two.sided	FALSE	TRUE	0.784569	0.150575	MORN2
SOS1	1244	11006	12250	6778303	0.138969	0	two.sided	FALSE	TRUE	0.293527	-0.302496	SOS1
MAP4K3	1244	11006	12250	6840245	0.853885	0	two.sided	FALSE	TRUE	0.924793	-0.0370829	MAP4K3
AC007388.1	1244	11006	12250	6807620	0.140964	0	two.sided	FALSE	TRUE	0.29666	-0.626026	AC007388.1
THUMPD2	1244	11006	12250	7.09289e+06	1.46796e-09	0	two.sided	FALSE	TRUE	2.62251e-08	0.970619	THUMPD2
AC083949.1	1244	11006	12250	6864569	0.247497	0	two.sided	FALSE	TRUE	0.436323	0.479735	AC083949.1
EML4	1244	11006	12250	7.9752e+06	1.02395e-25	0	two.sided	FALSE	TRUE	6.24018e-24	0.487428	EML4
COX7A2L	1244	11006	12250	6694447	0.113183	0	two.sided	FALSE	TRUE	0.254326	-0.0974066	COX7A2L
MTA3	1244	11006	12250	6.83427e+06	0.753409	0	two.sided	FALSE	TRUE	0.866136	-0.107174	MTA3
LINC02580	1244	11006	12250	6830418	0.299591	0	two.sided	FALSE	TRUE	0.496133	-0.776555	LINC02580
ZFP36L2	1244	11006	12250	5.19411e+06	4.10001e-45	0	two.sided	FALSE	TRUE	5.16021e-43	-0.321622	ZFP36L2
THADA	1244	11006	12250	6.85935e+06	0.797133	0	two.sided	FALSE	TRUE	0.893046	0.02877	THADA
DYNC2LI1	1244	11006	12250	6863574	0.374374	0	two.sided	FALSE	TRUE	0.569092	0.331084	DYNC2LI1
LRPPRC	1244	11006	12250	6757604	0.232052	0	two.sided	FALSE	TRUE	0.418394	-0.149459	LRPPRC
PPM1B	1244	11006	12250	7182339	3.11694e-05	0	two.sided	FALSE	TRUE	0.000267937	0.344145	PPM1B
SLC3A1	1244	11006	12250	6839754	0.643748	0	two.sided	FALSE	TRUE	0.79348	-0.333329	SLC3A1
PREPL	1244	11006	12250	6929645	0.0339793	0	two.sided	FALSE	TRUE	0.105822	0.417002	PREPL
CAMKMT	1244	11006	12250	6881178	0.465267	0	two.sided	FALSE	TRUE	0.649545	0.141715	CAMKMT
SRBD1	1244	11006	12250	6830724	0.710042	0	two.sided	FALSE	TRUE	0.836689	-0.114712	SRBD1
PRKCE	1244	11006	12250	6907874	0.103706	0	two.sided	FALSE	TRUE	0.238602	0.339754	PRKCE
ATP6V1E2	1244	11006	12250	6856012	0.736512	0	two.sided	FALSE	TRUE	0.855093	0.102446	ATP6V1E2
RHOQ	1244	11006	12250	6.87625e+06	0.447877	0	two.sided	FALSE	TRUE	0.635049	0.123847	RHOQ
PIGF	1244	11006	12250	6.72644e+06	0.010736	0	two.sided	FALSE	TRUE	0.0424275	-0.476265	PIGF
CRIPT	1244	11006	12250	6885064	0.432926	0	two.sided	FALSE	TRUE	0.622294	0.144328	CRIPT
SOCS5	1244	11006	12250	6785975	0.105124	0	two.sided	FALSE	TRUE	0.240797	-0.43585	SOCS5
MCFD2	1244	11006	12250	6799527	0.36505	0	two.sided	FALSE	TRUE	0.561516	-0.137962	MCFD2
TTC7A	1244	11006	12250	6.96319e+06	0.0165414	0	two.sided	FALSE	TRUE	0.0607872	0.365896	TTC7A
CALM2	1244	11006	12250	6488899	0.00155877	0	two.sided	FALSE	TRUE	0.00854594	-0.126001	CALM2
MSH2	1244	11006	12250	6708347	0.00125657	0	two.sided	FALSE	TRUE	0.00711856	-0.832397	MSH2
KCNK12	1244	11006	12250	6.81708e+06	0.315621	0	two.sided	FALSE	TRUE	0.51315	-0.334263	KCNK12
MSH6	1244	11006	12250	6825046	0.611398	0	two.sided	FALSE	TRUE	0.770334	-0.150246	MSH6
FBXO11	1244	11006	12250	6943458	0.0510906	0	two.sided	FALSE	TRUE	0.143517	0.373231	FBXO11
AC079807.1	1244	11006	12250	6.92873e+06	2.23793e-05	0	two.sided	FALSE	TRUE	0.000199484	1.42636	AC079807.1
FOXN2	1244	11006	12250	7.07527e+06	0.00333043	0	two.sided	FALSE	TRUE	0.0161962	0.263913	FOXN2
AC093635.1	1244	11006	12250	6.84682e+06	0.96113	0	two.sided	FALSE	TRUE	0.981733	0.0353354	AC093635.1
PPP1R21	1244	11006	12250	6.81728e+06	0.556236	0	two.sided	FALSE	TRUE	0.726772	-0.0927584	PPP1R21
ASB3	1244	11006	12250	6888774	0.364901	0	two.sided	FALSE	TRUE	0.561502	0.153324	ASB3
CHAC2	1244	11006	12250	6835922	0.509655	0	two.sided	FALSE	TRUE	0.687378	-0.453685	CHAC2
ERLEC1	1244	11006	12250	6.71059e+06	0.0946299	0	two.sided	FALSE	TRUE	0.224441	-0.137716	ERLEC1
PSME4	1244	11006	12250	7159538	0.000425455	0	two.sided	FALSE	TRUE	0.00276606	0.248647	PSME4
ACYP2	1244	11006	12250	6815709	0.642738	0	two.sided	FALSE	TRUE	0.793165	-0.0621136	ACYP2
SPTBN1	1244	11006	12250	6958627	0.0948276	0	two.sided	FALSE	TRUE	0.224841	0.178057	SPTBN1
RTN4	1244	11006	12250	6799606	0.625618	0	two.sided	FALSE	TRUE	0.779931	-0.0427177	RTN4
RPS27A	1244	11006	12250	5859022	6.62497e-17	0	two.sided	FALSE	TRUE	2.5151e-15	-0.0396274	RPS27A
MTIF2	1244	11006	12250	6910705	0.104068	0	two.sided	FALSE	TRUE	0.239159	0.299993	MTIF2
AC012358.3	1244	11006	12250	6852004	0.627526	0	two.sided	FALSE	TRUE	0.7808	0.294137	AC012358.3
CCDC88A	1244	11006	12250	6.8572e+06	0.764318	0	two.sided	FALSE	TRUE	0.872826	-0.0094622	CCDC88A
CFAP36	1244	11006	12250	7.022e+06	0.000360083	0	two.sided	FALSE	TRUE	0.0023955	0.509732	CFAP36
PPP4R3B	1244	11006	12250	6926699	0.345692	0	two.sided	FALSE	TRUE	0.542819	0.0792043	PPP4R3B
AC015982.1	1244	11006	12250	6.86189e+06	0.625456	0	two.sided	FALSE	TRUE	0.779863	0.191133	AC015982.1
PNPT1	1244	11006	12250	6768575	0.094472	0	two.sided	FALSE	TRUE	0.224296	-0.301381	PNPT1
VRK2	1244	11006	12250	6.89953e+06	0.379119	0	two.sided	FALSE	TRUE	0.572879	0.100767	VRK2
FANCL	1244	11006	12250	6874076	0.238095	0	two.sided	FALSE	TRUE	0.424989	0.359679	FANCL
PAPOLG	1244	11006	12250	6867238	0.649875	0	two.sided	FALSE	TRUE	0.798325	0.0928841	PAPOLG
REL	1244	11006	12250	7802380	6.56343e-20	0	two.sided	FALSE	TRUE	3.06443e-18	0.447592	REL
PUS10	1244	11006	12250	6.86713e+06	0.460699	0	two.sided	FALSE	TRUE	0.645815	0.181234	PUS10
PEX13	1244	11006	12250	6790000	0.20042	0	two.sided	FALSE	TRUE	0.380686	-0.30125	PEX13
KIAA1841	1244	11006	12250	6.81722e+06	0.308092	0	two.sided	FALSE	TRUE	0.505552	-0.32921	KIAA1841
C2orf74	1244	11006	12250	6874921	0.517159	0	two.sided	FALSE	TRUE	0.693676	0.168964	C2orf74
USP34	1244	11006	12250	7098994	0.00249079	0	two.sided	FALSE	TRUE	0.0126885	0.237177	USP34
AC016727.1	1244	11006	12250	6857243	0.663506	0	two.sided	FALSE	TRUE	0.807604	0.140935	AC016727.1
XPO1	1244	11006	12250	6965025	0.109318	0	two.sided	FALSE	TRUE	0.247563	0.166478	XPO1
FAM161A	1244	11006	12250	6862310	0.25395	0	two.sided	FALSE	TRUE	0.443714	0.620969	FAM161A
CCT4	1244	11006	12250	7188208	0.000525394	0	two.sided	FALSE	TRUE	0.00333344	0.18973	CCT4
COMMD1	1244	11006	12250	6744047	0.185656	0	two.sided	FALSE	TRUE	0.360481	-0.121956	COMMD1
B3GNT2	1244	11006	12250	6.66631e+06	0.007043	0	two.sided	FALSE	TRUE	0.0301593	-0.356309	B3GNT2
EHBP1	1244	11006	12250	6.85675e+06	0.810589	0	two.sided	FALSE	TRUE	0.900922	0.0596444	EHBP1
WDPCP	1244	11006	12250	6879623	0.332917	0	two.sided	FALSE	TRUE	0.530527	0.225806	WDPCP
MDH1	1244	11006	12250	6.80135e+06	0.611089	0	two.sided	FALSE	TRUE	0.770029	-0.0347141	MDH1
UGP2	1244	11006	12250	6.61037e+06	0.00286034	0	two.sided	FALSE	TRUE	0.014239	-0.300242	UGP2
VPS54	1244	11006	12250	6883388	0.122284	0	two.sided	FALSE	TRUE	0.268575	0.535243	VPS54
PELI1	1244	11006	12250	7.08371e+06	0.000381086	0	two.sided	FALSE	TRUE	0.0025143	0.370644	PELI1
AFTPH	1244	11006	12250	7.1236e+06	5.09245e-05	0	two.sided	FALSE	TRUE	0.000416717	0.408725	AFTPH
SERTAD2	1244	11006	12250	7217601	2.7454e-08	0	two.sided	FALSE	TRUE	4.1338e-07	0.580186	SERTAD2
SLC1A4	1244	11006	12250	6754716	0.0810313	0	two.sided	FALSE	TRUE	0.200508	-0.313918	SLC1A4
CEP68	1244	11006	12250	6.81073e+06	0.325493	0	two.sided	FALSE	TRUE	0.523528	-0.190497	CEP68
RAB1A	1244	11006	12250	7061382	0.00561344	0	two.sided	FALSE	TRUE	0.0249551	0.243237	RAB1A
ACTR2	1244	11006	12250	6548911	0.00637839	0	two.sided	FALSE	TRUE	0.0277339	-0.141193	ACTR2
ETAA1	1244	11006	12250	6958368	0.00277185	0	two.sided	FALSE	TRUE	0.0138641	0.563578	ETAA1
C1D	1244	11006	12250	6.76529e+06	0.327148	0	two.sided	FALSE	TRUE	0.524886	-0.093989	C1D
PNO1	1244	11006	12250	6922710	0.131502	0	two.sided	FALSE	TRUE	0.282197	0.275866	PNO1
PPP3R1	1244	11006	12250	7.1597e+06	6.74311e-05	0	two.sided	FALSE	TRUE	0.000538844	0.367718	PPP3R1
AC017083.2	1244	11006	12250	6871928	0.377471	0	two.sided	FALSE	TRUE	0.571487	0.218419	AC017083.2
AC017083.1	1244	11006	12250	6862522	0.364567	0	two.sided	FALSE	TRUE	0.561346	0.361503	AC017083.1
PLEK	1244	11006	12250	6.62733e+06	0.0458336	0	two.sided	FALSE	TRUE	0.132909	-0.101309	PLEK
FBXO48	1244	11006	12250	6.84049e+06	0.772805	0	two.sided	FALSE	TRUE	0.877371	-0.212443	FBXO48
APLF	1244	11006	12250	6.85822e+06	0.514132	0	two.sided	FALSE	TRUE	0.691421	0.319476	APLF
ARHGAP25	1244	11006	12250	7.04824e+06	0.0295291	0	two.sided	FALSE	TRUE	0.0947139	0.152538	ARHGAP25
GFPT1	1244	11006	12250	6823274	0.699239	0	two.sided	FALSE	TRUE	0.831411	-0.0428055	GFPT1
NFU1	1244	11006	12250	6.76825e+06	0.213439	0	two.sided	FALSE	TRUE	0.396886	-0.137023	NFU1
AAK1	1244	11006	12250	6.83055e+06	0.883247	0	two.sided	FALSE	TRUE	0.939493	-0.00332678	AAK1
ANXA4	1244	11006	12250	6.52768e+06	3.90228e-06	0	two.sided	FALSE	TRUE	4.09651e-05	-0.581577	ANXA4
GMCL1	1244	11006	12250	6.80268e+06	0.47661	0	two.sided	FALSE	TRUE	0.65926	-0.103017	GMCL1
SNRNP27	1244	11006	12250	7006510	0.0180634	0	two.sided	FALSE	TRUE	0.0651171	0.249456	SNRNP27
MXD1	1244	11006	12250	7299293	1.31691e-15	0	two.sided	FALSE	TRUE	4.55178e-14	0.988856	MXD1
PCBP1	1244	11006	12250	6183687	1.01813e-08	0	two.sided	FALSE	TRUE	1.62606e-07	-0.153885	PCBP1
C2orf42	1244	11006	12250	6.90511e+06	0.0189447	0	two.sided	FALSE	TRUE	0.0674749	0.64468	C2orf42
TIA1	1244	11006	12250	6997470	0.0204299	0	two.sided	FALSE	TRUE	0.0715974	0.262632	TIA1
PCYOX1	1244	11006	12250	6.77611e+06	0.0962023	0	two.sided	FALSE	TRUE	0.227054	-0.388559	PCYOX1
SNRPG	1244	11006	12250	7.09328e+06	0.0107252	0	two.sided	FALSE	TRUE	0.0424275	0.149345	SNRPG
FAM136A	1244	11006	12250	6905472	0.382403	0	two.sided	FALSE	TRUE	0.576317	0.116154	FAM136A
TEX261	1244	11006	12250	6867867	0.370317	0	two.sided	FALSE	TRUE	0.565537	0.273486	TEX261
NAGK	1244	11006	12250	6723599	0.0217974	0	two.sided	FALSE	TRUE	0.0754501	-0.434917	NAGK
MCEE	1244	11006	12250	6876902	0.369393	0	two.sided	FALSE	TRUE	0.565053	0.170369	MCEE
MPHOSPH10	1244	11006	12250	6675532	0.0177663	0	two.sided	FALSE	TRUE	0.0642061	-0.262	MPHOSPH10
PAIP2B	1244	11006	12250	6837098	0.683012	0	two.sided	FALSE	TRUE	0.82099	-0.208537	PAIP2B
ZNF638	1244	11006	12250	6.8684e+06	0.768208	0	two.sided	FALSE	TRUE	0.875138	0.075247	ZNF638
DYSF	1244	11006	12250	6824315	0.294181	0	two.sided	FALSE	TRUE	0.489906	-0.571431	DYSF
EXOC6B	1244	11006	12250	6846273	0.987253	0	two.sided	FALSE	TRUE	0.993992	0.0233148	EXOC6B
SFXN5	1244	11006	12250	6893325	0.0287765	0	two.sided	FALSE	TRUE	0.09284	0.661053	SFXN5
RAB11FIP5	1244	11006	12250	6746245	0.141876	0	two.sided	FALSE	TRUE	0.298038	-0.172912	RAB11FIP5
SMYD5	1244	11006	12250	6.8063e+06	0.0819465	0	two.sided	FALSE	TRUE	0.202186	-0.849564	SMYD5
PRADC1	1244	11006	12250	6699172	0.00151388	0	two.sided	FALSE	TRUE	0.00833928	-0.684621	PRADC1
CCT7	1244	11006	12250	6508521	0.000380134	0	two.sided	FALSE	TRUE	0.00250976	-0.263289	CCT7
FBXO41	1244	11006	12250	6857838	0.638388	0	two.sided	FALSE	TRUE	0.79007	0.101848	FBXO41
ALMS1	1244	11006	12250	6882109	0.383904	0	two.sided	FALSE	TRUE	0.577828	0.192216	ALMS1
TPRKB	1244	11006	12250	6760498	0.18043	0	two.sided	FALSE	TRUE	0.353442	-0.185355	TPRKB
DUSP11	1244	11006	12250	6968836	0.0911769	0	two.sided	FALSE	TRUE	0.218759	0.187842	DUSP11
STAMBP	1244	11006	12250	6.82283e+06	0.664016	0	two.sided	FALSE	TRUE	0.808139	-0.0692694	STAMBP
DGUOK	1244	11006	12250	6633702	0.0185587	0	two.sided	FALSE	TRUE	0.0665915	-0.19737	DGUOK
AC073046.1	1244	11006	12250	6839561	0.687218	0	two.sided	FALSE	TRUE	0.824298	-0.253483	AC073046.1
TET3	1244	11006	12250	6921812	0.00164052	0	two.sided	FALSE	TRUE	0.00893071	0.857034	TET3
BOLA3	1244	11006	12250	6581690	0.00019786	0	two.sided	FALSE	TRUE	0.00141421	-0.4603	BOLA3
BOLA3-AS1	1244	11006	12250	6.83262e+06	0.453523	0	two.sided	FALSE	TRUE	0.63916	-0.423211	BOLA3-AS1
MOB1A	1244	11006	12250	7293488	1.11731e-05	0	two.sided	FALSE	TRUE	0.000106832	0.253363	MOB1A
MTHFD2	1244	11006	12250	7033602	8.73938e-05	0	two.sided	FALSE	TRUE	0.000679878	0.559457	MTHFD2
DCTN1	1244	11006	12250	6683492	0.0403248	0	two.sided	FALSE	TRUE	0.120813	-0.209551	DCTN1
WDR54	1244	11006	12250	6834790	0.877044	0	two.sided	FALSE	TRUE	0.93649	-0.0173049	WDR54
INO80B	1244	11006	12250	6849890	0.849045	0	two.sided	FALSE	TRUE	0.922328	0.060766	INO80B
WBP1	1244	11006	12250	6.7823e+06	0.397065	0	two.sided	FALSE	TRUE	0.590043	-0.0899194	WBP1
MOGS	1244	11006	12250	6689541	0.0408541	0	two.sided	FALSE	TRUE	0.122014	-0.214802	MOGS
MRPL53	1244	11006	12250	6815663	0.253475	0	two.sided	FALSE	TRUE	0.443084	-0.386811	MRPL53
CCDC142	1244	11006	12250	6875495	0.0887722	0	two.sided	FALSE	TRUE	0.214771	0.682369	CCDC142
TTC31	1244	11006	12250	6.74516e+06	0.0518741	0	two.sided	FALSE	TRUE	0.14512	-0.377953	TTC31
LBX2-AS1	1244	11006	12250	6842242	0.778195	0	two.sided	FALSE	TRUE	0.880808	-0.203817	LBX2-AS1
PCGF1	1244	11006	12250	6765477	0.0997807	0	two.sided	FALSE	TRUE	0.232467	-0.317226	PCGF1
AUP1	1244	11006	12250	6.69635e+06	0.153476	0	two.sided	FALSE	TRUE	0.315479	-0.087202	AUP1
HTRA2	1244	11006	12250	6.86294e+06	0.785465	0	two.sided	FALSE	TRUE	0.885397	0.0671694	HTRA2
DOK1	1244	11006	12250	6753978	0.0265355	0	two.sided	FALSE	TRUE	0.0874373	-0.507629	DOK1
SEMA4F	1244	11006	12250	6786058	0.0261309	0	two.sided	FALSE	TRUE	0.0865723	-0.965636	SEMA4F
POLE4	1244	11006	12250	6.71185e+06	0.104838	0	two.sided	FALSE	TRUE	0.240427	-0.163901	POLE4
MRPL19	1244	11006	12250	6.75458e+06	0.0962944	0	two.sided	FALSE	TRUE	0.227132	-0.301162	MRPL19
GCFC2	1244	11006	12250	6.88866e+06	0.39013	0	two.sided	FALSE	TRUE	0.58401	0.150572	GCFC2
SUCLG1	1244	11006	12250	6720478	0.0924143	0	two.sided	FALSE	TRUE	0.220862	-0.18137	SUCLG1
TRABD2A	1244	11006	12250	6910054	0.0661155	0	two.sided	FALSE	TRUE	0.173309	0.383459	TRABD2A
TMSB10	1244	11006	12250	5026667	1.64643e-53	0	two.sided	FALSE	TRUE	2.44411e-51	-0.0905268	TMSB10
KCMF1	1244	11006	12250	7.04068e+06	0.0121945	0	two.sided	FALSE	TRUE	0.0471296	0.238278	KCMF1
TGOLN2	1244	11006	12250	6.975e+06	0.222787	0	two.sided	FALSE	TRUE	0.407771	0.0598534	TGOLN2
RETSAT	1244	11006	12250	6773562	0.0399956	0	two.sided	FALSE	TRUE	0.12018	-0.595441	RETSAT
ELMOD3	1244	11006	12250	6.87226e+06	0.604917	0	two.sided	FALSE	TRUE	0.765565	0.0684253	ELMOD3
CAPG	1244	11006	12250	6.84028e+06	0.698077	0	two.sided	FALSE	TRUE	0.830719	-0.267848	CAPG
MAT2A	1244	11006	12250	6641689	0.000984352	0	two.sided	FALSE	TRUE	0.00576812	-0.470978	MAT2A
GGCX	1244	11006	12250	6863173	0.661978	0	two.sided	FALSE	TRUE	0.806507	0.0883875	GGCX
VAMP8	1244	11006	12250	6.38078e+06	1.63697e-05	0	two.sided	FALSE	TRUE	0.000151272	-0.220394	VAMP8
VAMP5	1244	11006	12250	6.4743e+06	0.000152084	0	two.sided	FALSE	TRUE	0.00111808	-0.261938	VAMP5
RNF181	1244	11006	12250	7.04448e+06	0.0364663	0	two.sided	FALSE	TRUE	0.111675	0.137101	RNF181
TMEM150A	1244	11006	12250	6788840	0.085249	0	two.sided	FALSE	TRUE	0.20838	-0.487173	TMEM150A
USP39	1244	11006	12250	6.93133e+06	0.205355	0	two.sided	FALSE	TRUE	0.387328	0.195529	USP39
C2orf68	1244	11006	12250	6723980	0.0119193	0	two.sided	FALSE	TRUE	0.0462203	-0.484228	C2orf68
GNLY	1244	11006	12250	5.36057e+06	3.23182e-36	0	two.sided	FALSE	TRUE	3.06732e-34	-0.128218	GNLY
ST3GAL5	1244	11006	12250	6.96492e+06	0.0287927	0	two.sided	FALSE	TRUE	0.0928405	0.291521	ST3GAL5
POLR1A	1244	11006	12250	6.85265e+06	0.857838	0	two.sided	FALSE	TRUE	0.927166	0.0536989	POLR1A
PTCD3	1244	11006	12250	6.89547e+06	0.405296	0	two.sided	FALSE	TRUE	0.597673	0.105557	PTCD3
IMMT	1244	11006	12250	6740836	0.134462	0	two.sided	FALSE	TRUE	0.286729	-0.211845	IMMT
AC009309.1	1244	11006	12250	6.84774e+06	0.872817	0	two.sided	FALSE	TRUE	0.933698	0.0474114	AC009309.1
MRPL35	1244	11006	12250	6922547	0.0152298	0	two.sided	FALSE	TRUE	0.0568491	0.566941	MRPL35
KDM3A	1244	11006	12250	6977218	0.0531546	0	two.sided	FALSE	TRUE	0.147987	0.243639	KDM3A
CHMP3	1244	11006	12250	6.91369e+06	0.256799	0	two.sided	FALSE	TRUE	0.446938	0.123297	CHMP3
RNF103	1244	11006	12250	6.97766e+06	0.00368783	0	two.sided	FALSE	TRUE	0.0176817	0.498043	RNF103
RMND5A	1244	11006	12250	7074770	0.00378469	0	two.sided	FALSE	TRUE	0.0180937	0.247876	RMND5A
CD8A	1244	11006	12250	5.00325e+06	2.34268e-55	0	two.sided	FALSE	TRUE	3.66566e-53	-0.345546	CD8A
CD8B	1244	11006	12250	4687973	4.35869e-76	0	two.sided	FALSE	TRUE	1.14703e-73	-0.621946	CD8B
LINC01943	1244	11006	12250	7200444	4.7882e-20	0	two.sided	FALSE	TRUE	2.27224e-18	1.39296	LINC01943
CYTOR	1244	11006	12250	7.14914e+06	0.00222686	0	two.sided	FALSE	TRUE	0.0115887	0.218705	CYTOR
RGPD2	1244	11006	12250	6844630	0.933422	0	two.sided	FALSE	TRUE	0.967892	-0.0895231	RGPD2
KRCC1	1244	11006	12250	6709146	0.00797	0	two.sided	FALSE	TRUE	0.0334002	-0.49202	KRCC1
EIF2AK3	1244	11006	12250	7048708	3.37098e-05	0	two.sided	FALSE	TRUE	0.000287004	0.564844	EIF2AK3
AC062029.1	1244	11006	12250	6912433	1.55132e-05	0	two.sided	FALSE	TRUE	0.000144122	1.55896	AC062029.1
RPIA	1244	11006	12250	6818463	0.720015	0	two.sided	FALSE	TRUE	0.843489	-0.0700615	RPIA
IGKC	1244	11006	12250	6827109	0.284254	0	two.sided	FALSE	TRUE	0.478361	-0.68553	IGKC
IGKV3-20	1244	11006	12250	6785390	0.00858964	0	two.sided	FALSE	TRUE	0.0356486	-1.59233	IGKV3-20
MAL	1244	11006	12250	6.89658e+06	0.041225	0	two.sided	FALSE	TRUE	0.122932	0.575169	MAL
MRPS5	1244	11006	12250	6.98718e+06	0.067554	0	two.sided	FALSE	TRUE	0.175734	0.156065	MRPS5
ZNF514	1244	11006	12250	6.84818e+06	0.904823	0	two.sided	FALSE	TRUE	0.952363	-0.000992798	ZNF514
AC092835.1	1244	11006	12250	6848799	0.835448	0	two.sided	FALSE	TRUE	0.914766	0.11658	AC092835.1
FAHD2A	1244	11006	12250	6796093	0.305884	0	two.sided	FALSE	TRUE	0.503316	-0.178539	FAHD2A
LINC00342	1244	11006	12250	6.82803e+06	0.544924	0	two.sided	FALSE	TRUE	0.716357	-0.176928	LINC00342
ANKRD36C	1244	11006	12250	7.08558e+06	0.00300436	0	two.sided	FALSE	TRUE	0.0148664	0.266404	ANKRD36C
GPAT2	1244	11006	12250	6841321	0.783857	0	two.sided	FALSE	TRUE	0.88404	-0.215613	GPAT2
DUSP2	1244	11006	12250	7.92471e+06	8.5297e-22	0	two.sided	FALSE	TRUE	4.40917e-20	0.45096	DUSP2
STARD7	1244	11006	12250	6.94135e+06	0.290201	0	two.sided	FALSE	TRUE	0.485233	0.0859615	STARD7
TMEM127	1244	11006	12250	6747090	0.100038	0	two.sided	FALSE	TRUE	0.232878	-0.260379	TMEM127
CIAO1	1244	11006	12250	7003217	0.0577499	0	two.sided	FALSE	TRUE	0.157264	0.169112	CIAO1
SNRNP200	1244	11006	12250	6.78261e+06	0.508775	0	two.sided	FALSE	TRUE	0.686849	-0.0509716	SNRNP200
AC021188.1	1244	11006	12250	6822296	0.555715	0	two.sided	FALSE	TRUE	0.726303	-0.120469	AC021188.1
ITPRIPL1	1244	11006	12250	6856810	0.762236	0	two.sided	FALSE	TRUE	0.871094	0.0301592	ITPRIPL1
NCAPH	1244	11006	12250	6870280	0.219706	0	two.sided	FALSE	TRUE	0.404191	0.410683	NCAPH
ARID5A	1244	11006	12250	7296205	3.08762e-08	0	two.sided	FALSE	TRUE	4.60716e-07	0.474965	ARID5A
KANSL3	1244	11006	12250	6936056	0.0908047	0	two.sided	FALSE	TRUE	0.218229	0.250712	KANSL3
LMAN2L	1244	11006	12250	6817077	0.146769	0	two.sided	FALSE	TRUE	0.305709	-0.786834	LMAN2L
CNNM4	1244	11006	12250	6873474	0.329319	0	two.sided	FALSE	TRUE	0.526902	0.278549	CNNM4
CNNM3	1244	11006	12250	6848611	0.95418	0	two.sided	FALSE	TRUE	0.978085	0.00265642	CNNM3
ANKRD39	1244	11006	12250	6.74164e+06	0.0872378	0	two.sided	FALSE	TRUE	0.211944	-0.25758	ANKRD39
SEMA4C	1244	11006	12250	6.80745e+06	0.296375	0	two.sided	FALSE	TRUE	0.492428	-0.2769	SEMA4C
FAHD2B	1244	11006	12250	6773490	0.0555274	0	two.sided	FALSE	TRUE	0.15272	-0.513589	FAHD2B
ANKRD36	1244	11006	12250	6.91647e+06	0.290394	0	two.sided	FALSE	TRUE	0.485485	0.0954273	ANKRD36
AC092683.1	1244	11006	12250	6845841	0.997408	0	two.sided	FALSE	TRUE	0.998874	0.0335756	AC092683.1
ANKRD36B	1244	11006	12250	6871686	0.700704	0	two.sided	FALSE	TRUE	0.831633	0.0599951	ANKRD36B
COX5B	1244	11006	12250	6.82364e+06	0.845292	0	two.sided	FALSE	TRUE	0.919977	-0.0082806	COX5B
ACTR1B	1244	11006	12250	6598374	0.000756992	0	two.sided	FALSE	TRUE	0.00461327	-0.390311	ACTR1B
ZAP70	1244	11006	12250	5906880	2.07464e-16	0	two.sided	FALSE	TRUE	7.57801e-15	-0.308644	ZAP70
TMEM131	1244	11006	12250	6821422	0.717669	0	two.sided	FALSE	TRUE	0.842205	-0.0191198	TMEM131
INPP4A	1244	11006	12250	6.75246e+06	0.273727	0	two.sided	FALSE	TRUE	0.466856	-0.0863827	INPP4A
COA5	1244	11006	12250	6860975	0.799776	0	two.sided	FALSE	TRUE	0.894258	0.0208662	COA5
UNC50	1244	11006	12250	6658304	0.000705649	0	two.sided	FALSE	TRUE	0.00433	-0.584933	UNC50
MGAT4A	1244	11006	12250	6705530	0.178725	0	two.sided	FALSE	TRUE	0.351173	-0.0879417	MGAT4A
AC109826.1	1244	11006	12250	6843766	0.947781	0	two.sided	FALSE	TRUE	0.975411	-0.00889098	AC109826.1
TSGA10	1244	11006	12250	6891324	0.0591821	0	two.sided	FALSE	TRUE	0.160377	0.606622	TSGA10
LIPT1	1244	11006	12250	6869261	0.53471	0	two.sided	FALSE	TRUE	0.707833	0.140806	LIPT1
MITD1	1244	11006	12250	6867969	0.726417	0	two.sided	FALSE	TRUE	0.8485	0.0264227	MITD1
MRPL30	1244	11006	12250	6861516	0.471479	0	two.sided	FALSE	TRUE	0.65484	0.250579	MRPL30
TXNDC9	1244	11006	12250	6744078	0.0683578	0	two.sided	FALSE	TRUE	0.176993	-0.3183	TXNDC9
EIF5B	1244	11006	12250	6.73345e+06	0.212296	0	two.sided	FALSE	TRUE	0.395596	-0.111773	EIF5B
REV1	1244	11006	12250	6867857	0.710091	0	two.sided	FALSE	TRUE	0.836689	0.0753666	REV1
CHST10	1244	11006	12250	6820132	0.431064	0	two.sided	FALSE	TRUE	0.620885	-0.207871	CHST10
PDCL3	1244	11006	12250	6.62978e+06	0.00198409	0	two.sided	FALSE	TRUE	0.0105336	-0.359419	PDCL3
RPL31	1244	11006	12250	6.92414e+06	0.502769	0	two.sided	FALSE	TRUE	0.681928	0.00983727	RPL31
CNOT11	1244	11006	12250	6798973	0.454804	0	two.sided	FALSE	TRUE	0.640342	-0.10835	CNOT11
RNF149	1244	11006	12250	7348606	3.24318e-07	0	two.sided	FALSE	TRUE	4.19584e-06	0.29468	RNF149
MAP4K4	1244	11006	12250	6.80428e+06	0.581198	0	two.sided	FALSE	TRUE	0.747494	-0.0577697	MAP4K4
IL18R1	1244	11006	12250	6905060	0.0980783	0	two.sided	FALSE	TRUE	0.229982	0.400647	IL18R1
IL18RAP	1244	11006	12250	6893385	0.0790625	0	two.sided	FALSE	TRUE	0.197293	0.517784	IL18RAP
MFSD9	1244	11006	12250	6834308	0.715492	0	two.sided	FALSE	TRUE	0.84066	-0.114625	MFSD9
TMEM182	1244	11006	12250	6781500	0.00952324	0	two.sided	FALSE	TRUE	0.0385044	-1.31872	TMEM182
MRPS9	1244	11006	12250	6904271	0.22785	0	two.sided	FALSE	TRUE	0.414041	0.17475	MRPS9
LINC01918	1244	11006	12250	6819461	0.212306	0	two.sided	FALSE	TRUE	0.395596	-0.486306	LINC01918
TGFBRAP1	1244	11006	12250	6716330	0.0236629	0	two.sided	FALSE	TRUE	0.0802792	-0.357876	TGFBRAP1
AC012360.3	1244	11006	12250	6827481	0.516741	0	two.sided	FALSE	TRUE	0.693239	-0.239821	AC012360.3
C2orf49	1244	11006	12250	6941610	0.0755609	0	two.sided	FALSE	TRUE	0.190989	0.244414	C2orf49
FHL2	1244	11006	12250	6882510	0.00948309	0	two.sided	FALSE	TRUE	0.038447	1.08123	FHL2
NCK2	1244	11006	12250	6887306	0.570209	0	two.sided	FALSE	TRUE	0.738493	0.0640384	NCK2
UXS1	1244	11006	12250	6789783	0.219893	0	two.sided	FALSE	TRUE	0.404471	-0.253996	UXS1
CD8B2	1244	11006	12250	6943703	0.0103915	0	two.sided	FALSE	TRUE	0.0413909	0.486299	CD8B2
GCC2	1244	11006	12250	7353960	4.1662e-07	0	two.sided	FALSE	TRUE	5.29533e-06	0.298759	GCC2
GCC2-AS1	1244	11006	12250	6880763	0.00850811	0	two.sided	FALSE	TRUE	0.0353229	1.21564	GCC2-AS1
LIMS1	1244	11006	12250	6.82109e+06	0.660915	0	two.sided	FALSE	TRUE	0.80606	-0.0661784	LIMS1
RANBP2	1244	11006	12250	7288193	9.12164e-09	0	two.sided	FALSE	TRUE	1.46085e-07	0.485383	RANBP2
CCDC138	1244	11006	12250	6.8333e+06	0.64527	0	two.sided	FALSE	TRUE	0.794525	-0.137634	CCDC138
SMIM37	1244	11006	12250	6648368	0.00349223	0	two.sided	FALSE	TRUE	0.0168767	-0.364194	SMIM37
MIR4435-2HG	1244	11006	12250	6810637	0.677018	0	two.sided	FALSE	TRUE	0.81786	-0.0129232	MIR4435-2HG
BCL2L11	1244	11006	12250	6933274	0.0879626	0	two.sided	FALSE	TRUE	0.213247	0.258334	BCL2L11
AC017002.3	1244	11006	12250	6866537	0.161982	0	two.sided	FALSE	TRUE	0.328187	0.626342	AC017002.3
ANAPC1	1244	11006	12250	6.90833e+06	0.269951	0	two.sided	FALSE	TRUE	0.462665	0.186642	ANAPC1
TMEM87B	1244	11006	12250	6.83345e+06	0.837071	0	two.sided	FALSE	TRUE	0.915363	-0.0531071	TMEM87B
ZC3H8	1244	11006	12250	6.86089e+06	0.774545	0	two.sided	FALSE	TRUE	0.87883	0.0371558	ZC3H8
ZC3H6	1244	11006	12250	6941999	0.0716475	0	two.sided	FALSE	TRUE	0.183292	0.278317	ZC3H6
TTL	1244	11006	12250	6.84377e+06	0.960561	0	two.sided	FALSE	TRUE	0.981384	0.0486259	TTL
POLR1B	1244	11006	12250	6.8385e+06	0.833771	0	two.sided	FALSE	TRUE	0.91388	0.00656025	POLR1B
CHCHD5	1244	11006	12250	6.79213e+06	0.491252	0	two.sided	FALSE	TRUE	0.672922	-0.0891801	CHCHD5
AC079922.2	1244	11006	12250	6853107	0.83607	0	two.sided	FALSE	TRUE	0.914982	0.125581	AC079922.2
SLC20A1	1244	11006	12250	7304244	6.82303e-08	0	two.sided	FALSE	TRUE	9.74154e-07	0.423123	SLC20A1
CKAP2L	1244	11006	12250	6871690	0.0403268	0	two.sided	FALSE	TRUE	0.120813	1.32221	CKAP2L
PSD4	1244	11006	12250	6.65064e+06	0.00687852	0	two.sided	FALSE	TRUE	0.0295203	-0.319347	PSD4
PAX8	1244	11006	12250	6789362	0.00722199	0	two.sided	FALSE	TRUE	0.0308232	-1.81949	PAX8
CBWD2	1244	11006	12250	6940802	0.0419027	0	two.sided	FALSE	TRUE	0.124472	0.340892	CBWD2
RABL2A	1244	11006	12250	6.87872e+06	0.0389233	0	two.sided	FALSE	TRUE	0.117613	0.898151	RABL2A
SLC35F5	1244	11006	12250	6.79217e+06	0.20616	0	two.sided	FALSE	TRUE	0.387772	-0.268007	SLC35F5
ACTR3	1244	11006	12250	6582015	0.0141245	0	two.sided	FALSE	TRUE	0.0532727	-0.137162	ACTR3
DDX18	1244	11006	12250	6560541	0.00205204	0	two.sided	FALSE	TRUE	0.0108199	-0.263763	DDX18
CCDC93	1244	11006	12250	6946723	0.0905853	0	two.sided	FALSE	TRUE	0.217837	0.216594	CCDC93
INSIG2	1244	11006	12250	6.76613e+06	0.0873642	0	two.sided	FALSE	TRUE	0.212207	-0.324183	INSIG2
C2orf76	1244	11006	12250	6839132	0.8631	0	two.sided	FALSE	TRUE	0.92914	-0.0374772	C2orf76
DBI	1244	11006	12250	5754048	1.40845e-22	0	two.sided	FALSE	TRUE	7.51542e-21	-0.443441	DBI
TMEM177	1244	11006	12250	6.84673e+06	0.953765	0	two.sided	FALSE	TRUE	0.977966	-0.00229839	TMEM177
PTPN4	1244	11006	12250	7.02313e+06	0.0740912	0	two.sided	FALSE	TRUE	0.187848	0.111184	PTPN4
EPB41L5	1244	11006	12250	6844580	0.95447	0	two.sided	FALSE	TRUE	0.978182	-0.0450485	EPB41L5
TMEM185B	1244	11006	12250	6.81933e+06	0.512689	0	two.sided	FALSE	TRUE	0.690282	-0.164483	TMEM185B
RALB	1244	11006	12250	6.83165e+06	0.748868	0	two.sided	FALSE	TRUE	0.863055	-0.0565614	RALB
TFCP2L1	1244	11006	12250	6877780	0.0113596	0	two.sided	FALSE	TRUE	0.0444069	1.358	TFCP2L1
CLASP1	1244	11006	12250	6968497	0.0232893	0	two.sided	FALSE	TRUE	0.0794541	0.310983	CLASP1
NIFK-AS1	1244	11006	12250	6.87203e+06	0.375645	0	two.sided	FALSE	TRUE	0.56999	0.24168	NIFK-AS1
NIFK	1244	11006	12250	6.8516e+06	0.929853	0	two.sided	FALSE	TRUE	0.96705	-0.0106018	NIFK
TSN	1244	11006	12250	6.59463e+06	0.000875307	0	two.sided	FALSE	TRUE	0.00523241	-0.361903	TSN
GYPC	1244	11006	12250	6659107	0.089855	0	two.sided	FALSE	TRUE	0.216687	-0.0776775	GYPC
BIN1	1244	11006	12250	6483858	0.000318371	0	two.sided	FALSE	TRUE	0.00214826	-0.252999	BIN1
ERCC3	1244	11006	12250	6814935	0.65489	0	two.sided	FALSE	TRUE	0.802262	-0.0677918	ERCC3
MAP3K2	1244	11006	12250	7.40194e+06	2.00953e-10	0	two.sided	FALSE	TRUE	4.08216e-09	0.467872	MAP3K2
IWS1	1244	11006	12250	7143266	5.58874e-06	0	two.sided	FALSE	TRUE	5.67152e-05	0.492232	IWS1
WDR33	1244	11006	12250	7.11449e+06	0.00159118	0	two.sided	FALSE	TRUE	0.00868658	0.255835	WDR33
SFT2D3	1244	11006	12250	6810133	0.298737	0	two.sided	FALSE	TRUE	0.495286	-0.246774	SFT2D3
POLR2D	1244	11006	12250	6904623	0.308116	0	two.sided	FALSE	TRUE	0.505552	0.142215	POLR2D
AMMECR1L	1244	11006	12250	6875813	0.314414	0	two.sided	FALSE	TRUE	0.512328	0.300863	AMMECR1L
AC012306.2	1244	11006	12250	6943232	6.92493e-05	0	two.sided	FALSE	TRUE	0.00055147	1.043	AC012306.2
SAP130	1244	11006	12250	6970982	0.0140168	0	two.sided	FALSE	TRUE	0.0529358	0.357226	SAP130
UGGT1	1244	11006	12250	6861826	0.780346	0	two.sided	FALSE	TRUE	0.882063	0.0169996	UGGT1
HS6ST1	1244	11006	12250	6761788	0.00394767	0	two.sided	FALSE	TRUE	0.0187567	-1.21528	HS6ST1
SMPD4	1244	11006	12250	7082293	0.000155875	0	two.sided	FALSE	TRUE	0.0011445	0.427604	SMPD4
MZT2B	1244	11006	12250	6.84722e+06	0.989574	0	two.sided	FALSE	TRUE	0.99527	0.00304125	MZT2B
CCDC115	1244	11006	12250	6618949	0.00479452	0	two.sided	FALSE	TRUE	0.0220738	-0.279125	CCDC115
IMP4	1244	11006	12250	6791278	0.49726	0	two.sided	FALSE	TRUE	0.678244	-0.0609025	IMP4
PTPN18	1244	11006	12250	6.40896e+06	1.03946e-05	0	two.sided	FALSE	TRUE	0.00010005	-0.308937	PTPN18
PRSS40A	1244	11006	12250	6860522	0.280017	0	two.sided	FALSE	TRUE	0.474301	0.574716	PRSS40A
FAM168B	1244	11006	12250	6.94583e+06	0.0720284	0	two.sided	FALSE	TRUE	0.184024	0.260361	FAM168B
PLEKHB2	1244	11006	12250	6944673	0.148566	0	two.sided	FALSE	TRUE	0.308398	0.167423	PLEKHB2
MZT2A	1244	11006	12250	7169760	0.00120136	0	two.sided	FALSE	TRUE	0.00685585	0.201199	MZT2A
CCDC74A	1244	11006	12250	6842864	0.814931	0	two.sided	FALSE	TRUE	0.903922	-0.169537	CCDC74A
AC103564.1	1244	11006	12250	6838648	0.700661	0	two.sided	FALSE	TRUE	0.831633	-0.207223	AC103564.1
MGAT5	1244	11006	12250	6.81916e+06	0.517844	0	two.sided	FALSE	TRUE	0.694156	-0.154764	MGAT5
TMEM163	1244	11006	12250	6861671	0.276534	0	two.sided	FALSE	TRUE	0.470211	0.546946	TMEM163
CCNT2-AS1	1244	11006	12250	6856160	0.473013	0	two.sided	FALSE	TRUE	0.656095	0.339983	CCNT2-AS1
CCNT2	1244	11006	12250	6.92951e+06	0.252961	0	two.sided	FALSE	TRUE	0.442654	0.132154	CCNT2
RAB3GAP1	1244	11006	12250	6.84942e+06	0.911203	0	two.sided	FALSE	TRUE	0.955743	0.0568455	RAB3GAP1
ZRANB3	1244	11006	12250	6838913	0.791744	0	two.sided	FALSE	TRUE	0.88954	-0.111676	ZRANB3
R3HDM1	1244	11006	12250	6.80175e+06	0.487329	0	two.sided	FALSE	TRUE	0.669828	-0.0980738	R3HDM1
UBXN4	1244	11006	12250	7.4783e+06	1.7306e-09	0	two.sided	FALSE	TRUE	3.06871e-08	0.295537	UBXN4
MCM6	1244	11006	12250	6.85839e+06	0.788807	0	two.sided	FALSE	TRUE	0.887619	0.0982832	MCM6
DARS	1244	11006	12250	6732325	0.114275	0	two.sided	FALSE	TRUE	0.256023	-0.189532	DARS
CXCR4	1244	11006	12250	6520992	0.00516011	0	two.sided	FALSE	TRUE	0.0233668	-0.0817094	CXCR4
SPOPL	1244	11006	12250	6969260	0.0112458	0	two.sided	FALSE	TRUE	0.0440361	0.407091	SPOPL
KYNU	1244	11006	12250	6811948	0.0332479	0	two.sided	FALSE	TRUE	0.103852	-2.00715	KYNU
ARHGAP15	1244	11006	12250	7174618	0.00055125	0	two.sided	FALSE	TRUE	0.00348223	0.23281	ARHGAP15
GTDC1	1244	11006	12250	6811193	0.557282	0	two.sided	FALSE	TRUE	0.727564	-0.0493367	GTDC1
ZEB2	1244	11006	12250	7.62034e+06	1.42475e-11	0	two.sided	FALSE	TRUE	3.29286e-10	0.214374	ZEB2
ZEB2-AS1	1244	11006	12250	6965461	2.55293e-05	0	two.sided	FALSE	TRUE	0.000224793	1.00192	ZEB2-AS1
ACVR2A	1244	11006	12250	6862030	0.356617	0	two.sided	FALSE	TRUE	0.553151	0.438305	ACVR2A
ORC4	1244	11006	12250	6.96837e+06	0.0230203	0	two.sided	FALSE	TRUE	0.0787257	0.352056	ORC4
MBD5	1244	11006	12250	7146502	1.39537e-05	0	two.sided	FALSE	TRUE	0.00013072	0.441825	MBD5
EPC2	1244	11006	12250	6985982	0.00619904	0	two.sided	FALSE	TRUE	0.0271272	0.435832	EPC2
KIF5C	1244	11006	12250	6868040	0.353139	0	two.sided	FALSE	TRUE	0.549597	0.328761	KIF5C
MMADHC	1244	11006	12250	6944325	0.255012	0	two.sided	FALSE	TRUE	0.44483	0.0944618	MMADHC
RBM43	1244	11006	12250	6958849	0.0271164	0	two.sided	FALSE	TRUE	0.0889716	0.287844	RBM43
NMI	1244	11006	12250	6815379	0.609611	0	two.sided	FALSE	TRUE	0.76902	-0.0264793	NMI
RIF1	1244	11006	12250	6980660	0.0502987	0	two.sided	FALSE	TRUE	0.141912	0.191591	RIF1
ARL5A	1244	11006	12250	6.62742e+06	0.0117965	0	two.sided	FALSE	TRUE	0.0458053	-0.217484	ARL5A
STAM2	1244	11006	12250	6.89349e+06	0.153876	0	two.sided	FALSE	TRUE	0.316134	0.348413	STAM2
PRPF40A	1244	11006	12250	7.58326e+06	2.007e-13	0	two.sided	FALSE	TRUE	5.68192e-12	0.433633	PRPF40A
ARL6IP6	1244	11006	12250	6846110	0.994956	0	two.sided	FALSE	TRUE	0.998319	-0.0185464	ARL6IP6
NR4A2	1244	11006	12250	7225335	3.13036e-05	0	two.sided	FALSE	TRUE	0.000268891	0.308097	NR4A2
GPD2	1244	11006	12250	6799775	0.0780271	0	two.sided	FALSE	TRUE	0.195346	-0.668179	GPD2
ERMN	1244	11006	12250	6.94031e+06	9.07417e-05	0	two.sided	FALSE	TRUE	0.0007014	1.07239	ERMN
CYTIP	1244	11006	12250	7.36743e+06	2.91618e-06	0	two.sided	FALSE	TRUE	3.13814e-05	0.193684	CYTIP
ACVR1	1244	11006	12250	6.83156e+06	0.365297	0	two.sided	FALSE	TRUE	0.561723	-0.650438	ACVR1
PKP4	1244	11006	12250	6.87809e+06	0.130142	0	two.sided	FALSE	TRUE	0.280606	0.493682	PKP4
WDSUB1	1244	11006	12250	6.82502e+06	0.675231	0	two.sided	FALSE	TRUE	0.816393	-0.0912037	WDSUB1
BAZ2B	1244	11006	12250	6892635	0.325777	0	two.sided	FALSE	TRUE	0.523767	0.236041	BAZ2B
AC009961.1	1244	11006	12250	6839614	0.812276	0	two.sided	FALSE	TRUE	0.902191	-0.065063	AC009961.1
MARCH7	1244	11006	12250	6.84636e+06	0.99339	0	two.sided	FALSE	TRUE	0.997439	-0.0076176	MARCH7
LY75	1244	11006	12250	6769622	0.0113569	0	two.sided	FALSE	TRUE	0.0444069	-0.955928	LY75
RBMS1	1244	11006	12250	6670130	0.0671292	0	two.sided	FALSE	TRUE	0.175024	-0.122905	RBMS1
TANK	1244	11006	12250	7401884	6.93878e-14	0	two.sided	FALSE	TRUE	2.07073e-12	0.678604	TANK
PSMD14	1244	11006	12250	6892202	0.533178	0	two.sided	FALSE	TRUE	0.706531	0.0720845	PSMD14
DPP4	1244	11006	12250	6.86123e+06	0.205901	0	two.sided	FALSE	TRUE	0.387614	0.654873	DPP4
IFIH1	1244	11006	12250	7113442	2.99857e-09	0	two.sided	FALSE	TRUE	5.15139e-08	0.934349	IFIH1
GCA	1244	11006	12250	6.91044e+06	0.00899947	0	two.sided	FALSE	TRUE	0.036939	0.845665	GCA
GALNT3	1244	11006	12250	7120929	1.89395e-06	0	two.sided	FALSE	TRUE	2.11885e-05	0.581519	GALNT3
AC009495.3	1244	11006	12250	6865451	0.547856	0	two.sided	FALSE	TRUE	0.719395	0.169297	AC009495.3
TTC21B	1244	11006	12250	6985415	0.00529936	0	two.sided	FALSE	TRUE	0.0238667	0.446281	TTC21B
STK39	1244	11006	12250	6.95867e+06	0.13139	0	two.sided	FALSE	TRUE	0.282099	0.150981	STK39
CERS6	1244	11006	12250	6.85941e+06	0.700688	0	two.sided	FALSE	TRUE	0.831633	0.105984	CERS6
BBS5	1244	11006	12250	6867974	0.0662902	0	two.sided	FALSE	TRUE	0.173463	0.916359	BBS5
FASTKD1	1244	11006	12250	6807690	0.204112	0	two.sided	FALSE	TRUE	0.385605	-0.398714	FASTKD1
PPIG	1244	11006	12250	7.0054e+06	0.0951578	0	two.sided	FALSE	TRUE	0.225278	0.117875	PPIG
PHOSPHO2	1244	11006	12250	6843126	0.933302	0	two.sided	FALSE	TRUE	0.967892	0.0262826	PHOSPHO2
SSB	1244	11006	12250	7.06643e+06	0.0266382	0	two.sided	FALSE	TRUE	0.0876759	0.134977	SSB
METTL5	1244	11006	12250	6830628	0.830279	0	two.sided	FALSE	TRUE	0.91313	-0.0272467	METTL5
UBR3	1244	11006	12250	6864199	0.742842	0	two.sided	FALSE	TRUE	0.859406	0.0878068	UBR3
MYO3B	1244	11006	12250	6902250	0.0200288	0	two.sided	FALSE	TRUE	0.0703666	0.68209	MYO3B
GORASP2	1244	11006	12250	6.94492e+06	0.238498	0	two.sided	FALSE	TRUE	0.425446	0.0956699	GORASP2
TLK1	1244	11006	12250	6.9864e+06	0.084205	0	two.sided	FALSE	TRUE	0.206368	0.15993	TLK1
METTL8	1244	11006	12250	6766338	0.0279913	0	two.sided	FALSE	TRUE	0.0910679	-0.552957	METTL8
DCAF17	1244	11006	12250	6.92712e+06	0.0691896	0	two.sided	FALSE	TRUE	0.178612	0.293385	DCAF17
DYNC1I2	1244	11006	12250	6793681	0.314886	0	two.sided	FALSE	TRUE	0.51252	-0.187942	DYNC1I2
SLC25A12	1244	11006	12250	6.90839e+06	0.244334	0	two.sided	FALSE	TRUE	0.433047	0.177482	SLC25A12
HAT1	1244	11006	12250	6840047	0.930069	0	two.sided	FALSE	TRUE	0.967068	-0.00298384	HAT1
METAP1D	1244	11006	12250	6814809	0.180801	0	two.sided	FALSE	TRUE	0.353929	-0.609702	METAP1D
ITGA6	1244	11006	12250	6873284	0.278719	0	two.sided	FALSE	TRUE	0.472516	0.325435	ITGA6
AC078883.1	1244	11006	12250	6.93566e+06	0.00226966	0	two.sided	FALSE	TRUE	0.0117691	0.711342	AC078883.1
PDK1	1244	11006	12250	6918659	0.0569966	0	two.sided	FALSE	TRUE	0.155725	0.448392	PDK1
MAP3K20	1244	11006	12250	6.89382e+06	0.0823129	0	two.sided	FALSE	TRUE	0.202874	0.481261	MAP3K20
CDCA7	1244	11006	12250	6.93736e+06	0.0017962	0	two.sided	FALSE	TRUE	0.00965563	0.823236	CDCA7
SP3	1244	11006	12250	6.91564e+06	0.421346	0	two.sided	FALSE	TRUE	0.611869	0.0707711	SP3
OLA1	1244	11006	12250	6739565	0.208146	0	two.sided	FALSE	TRUE	0.39021	-0.120646	OLA1
CIR1	1244	11006	12250	7.19853e+06	9.85916e-05	0	two.sided	FALSE	TRUE	0.000756794	0.300075	CIR1
SCRN3	1244	11006	12250	6.9188e+06	0.0483113	0	two.sided	FALSE	TRUE	0.137624	0.390549	SCRN3
GPR155	1244	11006	12250	6.82077e+06	0.434725	0	two.sided	FALSE	TRUE	0.623812	-0.229769	GPR155
WIPF1	1244	11006	12250	7.19586e+06	0.00180164	0	two.sided	FALSE	TRUE	0.00968035	0.116985	WIPF1
AC010894.4	1244	11006	12250	6892201	0.00319451	0	two.sided	FALSE	TRUE	0.0156469	1.17234	AC010894.4
CHN1	1244	11006	12250	6.85793e+06	0.426259	0	two.sided	FALSE	TRUE	0.616495	0.358536	CHN1
ATF2	1244	11006	12250	7083105	0.000297023	0	two.sided	FALSE	TRUE	0.00201951	0.386399	ATF2
ATP5MC3	1244	11006	12250	6.7275e+06	0.286046	0	two.sided	FALSE	TRUE	0.480158	-0.0495356	ATP5MC3
LNPK	1244	11006	12250	6842291	0.950138	0	two.sided	FALSE	TRUE	0.976969	-0.0243187	LNPK
MTX2	1244	11006	12250	6.82234e+06	0.482459	0	two.sided	FALSE	TRUE	0.66476	-0.192451	MTX2
HNRNPA3	1244	11006	12250	6.52162e+06	0.00420283	0	two.sided	FALSE	TRUE	0.0197663	-0.10755	HNRNPA3
NFE2L2	1244	11006	12250	6.94213e+06	0.167258	0	two.sided	FALSE	TRUE	0.335298	0.145197	NFE2L2
AGPS	1244	11006	12250	6.83542e+06	0.856173	0	two.sided	FALSE	TRUE	0.926248	-0.0172447	AGPS
TTC30B	1244	11006	12250	6814766	0.193535	0	two.sided	FALSE	TRUE	0.370833	-0.522941	TTC30B
TTC30A	1244	11006	12250	6793855	0.0313112	0	two.sided	FALSE	TRUE	0.0991864	-1.04302	TTC30A
RBM45	1244	11006	12250	6.89062e+06	0.24843	0	two.sided	FALSE	TRUE	0.437568	0.207177	RBM45
AC009948.1	1244	11006	12250	6835642	0.574337	0	two.sided	FALSE	TRUE	0.742381	-0.291797	AC009948.1
PRKRA	1244	11006	12250	6.85868e+06	0.823915	0	two.sided	FALSE	TRUE	0.909188	0.0480267	PRKRA
FKBP7	1244	11006	12250	6849314	0.820236	0	two.sided	FALSE	TRUE	0.907009	0.0737889	FKBP7
PLEKHA3	1244	11006	12250	6948914	0.16402	0	two.sided	FALSE	TRUE	0.33109	0.144589	PLEKHA3
TTN-AS1	1244	11006	12250	6811857	0.431498	0	two.sided	FALSE	TRUE	0.621257	-0.11171	TTN-AS1
TTN	1244	11006	12250	6808001	0.273379	0	two.sided	FALSE	TRUE	0.466501	-0.205793	TTN
CCDC141	1244	11006	12250	6837190	0.559801	0	two.sided	FALSE	TRUE	0.729373	-0.280102	CCDC141
SESTD1	1244	11006	12250	6852348	0.758686	0	two.sided	FALSE	TRUE	0.869354	0.074785	SESTD1
CWC22	1244	11006	12250	6902408	0.267376	0	two.sided	FALSE	TRUE	0.459817	0.198999	CWC22
UBE2E3	1244	11006	12250	6872070	0.769838	0	two.sided	FALSE	TRUE	0.875462	0.0108337	UBE2E3
LINC01934	1244	11006	12250	6.91872e+06	0.0833395	0	two.sided	FALSE	TRUE	0.205055	0.336258	LINC01934
ITGA4	1244	11006	12250	6.79318e+06	0.644551	0	two.sided	FALSE	TRUE	0.793879	-0.0183459	ITGA4
SSFA2	1244	11006	12250	6884874	0.362988	0	two.sided	FALSE	TRUE	0.559929	0.15797	SSFA2
DNAJC10	1244	11006	12250	6.81526e+06	0.605887	0	two.sided	FALSE	TRUE	0.766172	-0.0870158	DNAJC10
NCKAP1	1244	11006	12250	6875886	0.392675	0	two.sided	FALSE	TRUE	0.585844	0.195662	NCKAP1
DUSP19	1244	11006	12250	6.84901e+06	0.789149	0	two.sided	FALSE	TRUE	0.887918	0.329435	DUSP19
NUP35	1244	11006	12250	6.86153e+06	0.543748	0	two.sided	FALSE	TRUE	0.715217	0.168155	NUP35
ZC3H15	1244	11006	12250	7018040	0.0985367	0	two.sided	FALSE	TRUE	0.230615	0.0803256	ZC3H15
ITGAV	1244	11006	12250	6888099	0.314825	0	two.sided	FALSE	TRUE	0.512493	0.207604	ITGAV
WDR75	1244	11006	12250	6.85867e+06	0.802399	0	two.sided	FALSE	TRUE	0.895894	0.0662406	WDR75
ASNSD1	1244	11006	12250	6906945	0.273973	0	two.sided	FALSE	TRUE	0.466957	0.150733	ASNSD1
ANKAR	1244	11006	12250	6819782	0.629171	0	two.sided	FALSE	TRUE	0.78218	-0.0408551	ANKAR
OSGEPL1	1244	11006	12250	6852062	0.840214	0	two.sided	FALSE	TRUE	0.917295	0.0395052	OSGEPL1
ORMDL1	1244	11006	12250	6669070	0.0297097	0	two.sided	FALSE	TRUE	0.0951904	-0.206655	ORMDL1
PMS1	1244	11006	12250	6803016	0.501034	0	two.sided	FALSE	TRUE	0.681071	-0.0980104	PMS1
HIBCH	1244	11006	12250	6.83547e+06	0.805238	0	two.sided	FALSE	TRUE	0.897031	-0.0339453	HIBCH
INPP1	1244	11006	12250	6.86133e+06	0.638117	0	two.sided	FALSE	TRUE	0.789903	0.166356	INPP1
MFSD6	1244	11006	12250	6789973	0.307094	0	two.sided	FALSE	TRUE	0.504599	-0.204195	MFSD6
NEMP2	1244	11006	12250	6830106	0.575621	0	two.sided	FALSE	TRUE	0.743625	-0.162496	NEMP2
AC108047.1	1244	11006	12250	6.8486e+06	0.865048	0	two.sided	FALSE	TRUE	0.929854	0.0736225	AC108047.1
NAB1	1244	11006	12250	6.86024e+06	0.666648	0	two.sided	FALSE	TRUE	0.809641	0.102824	NAB1
AC005540.1	1244	11006	12250	6859083	0.40942	0	two.sided	FALSE	TRUE	0.601228	0.38069	AC005540.1
GLS	1244	11006	12250	7639605	3.20626e-15	0	two.sided	FALSE	TRUE	1.06376e-13	0.459159	GLS
STAT1	1244	11006	12250	7.09848e+06	0.00239398	0	two.sided	FALSE	TRUE	0.0123309	0.225597	STAT1
STAT4	1244	11006	12250	7023862	0.0659729	0	two.sided	FALSE	TRUE	0.173102	0.124375	STAT4
NABP1	1244	11006	12250	7437643	5.58795e-42	0	two.sided	FALSE	TRUE	6.34342e-40	1.83665	NABP1
CAVIN2	1244	11006	12250	6823962	0.0464046	0	two.sided	FALSE	TRUE	0.134028	-4.96125	CAVIN2
SLC39A10	1244	11006	12250	7157177	1.91508e-06	0	two.sided	FALSE	TRUE	2.14042e-05	0.540033	SLC39A10
STK17B	1244	11006	12250	7.69066e+06	3.95467e-14	0	two.sided	FALSE	TRUE	1.19872e-12	0.293817	STK17B
AC114760.2	1244	11006	12250	6872055	0.0790946	0	two.sided	FALSE	TRUE	0.197293	0.805592	AC114760.2
GTF3C3	1244	11006	12250	6870883	0.577916	0	two.sided	FALSE	TRUE	0.745343	0.0895172	GTF3C3
PGAP1	1244	11006	12250	6.90038e+06	0.00650823	0	two.sided	FALSE	TRUE	0.0282031	0.941909	PGAP1
ANKRD44	1244	11006	12250	6732022	0.267664	0	two.sided	FALSE	TRUE	0.459992	-0.0755567	ANKRD44
AC013264.1	1244	11006	12250	6866767	0.0895266	0	two.sided	FALSE	TRUE	0.216144	1.03587	AC013264.1
SF3B1	1244	11006	12250	7277914	0.000121502	0	two.sided	FALSE	TRUE	0.000914147	0.147966	SF3B1
COQ10B	1244	11006	12250	6850630	0.953142	0	two.sided	FALSE	TRUE	0.97791	-0.00497904	COQ10B
HSPD1	1244	11006	12250	8.02503e+06	6.23897e-48	0	two.sided	FALSE	TRUE	8.30357e-46	1.23626	HSPD1
HSPE1	1244	11006	12250	8.67665e+06	9.45488e-79	0	two.sided	FALSE	TRUE	2.73695e-76	1.26309	HSPE1
MOB4	1244	11006	12250	7029165	0.00959113	0	two.sided	FALSE	TRUE	0.0387359	0.266722	MOB4
MARS2	1244	11006	12250	6788160	0.0467698	0	two.sided	FALSE	TRUE	0.13468	-0.753166	MARS2
PLCL1	1244	11006	12250	6867924	0.452132	0	two.sided	FALSE	TRUE	0.638073	0.238764	PLCL1
FTCDNL1	1244	11006	12250	6845000	0.964627	0	two.sided	FALSE	TRUE	0.983219	0.0527414	FTCDNL1
C2orf69	1244	11006	12250	6922795	0.0658164	0	two.sided	FALSE	TRUE	0.172927	0.348952	C2orf69
TYW5	1244	11006	12250	6871993	0.460076	0	two.sided	FALSE	TRUE	0.645815	0.154899	TYW5
MAIP1	1244	11006	12250	6899077	0.242454	0	two.sided	FALSE	TRUE	0.430687	0.17973	MAIP1
SPATS2L	1244	11006	12250	6881956	0.409135	0	two.sided	FALSE	TRUE	0.601037	0.144541	SPATS2L
KCTD18	1244	11006	12250	6893342	0.332509	0	two.sided	FALSE	TRUE	0.53032	0.160033	KCTD18
SGO2	1244	11006	12250	6819670	0.262316	0	two.sided	FALSE	TRUE	0.453472	-0.516089	SGO2
BZW1	1244	11006	12250	6.63058e+06	0.0470289	0	two.sided	FALSE	TRUE	0.135258	-0.0952469	BZW1
CLK1	1244	11006	12250	7563512	2.47022e-13	0	two.sided	FALSE	TRUE	6.87564e-12	0.445623	CLK1
PPIL3	1244	11006	12250	6923876	0.0501318	0	two.sided	FALSE	TRUE	0.141579	0.341658	PPIL3
NIF3L1	1244	11006	12250	6745928	0.00654114	0	two.sided	FALSE	TRUE	0.0282928	-0.725787	NIF3L1
ORC2	1244	11006	12250	6970220	0.00776432	0	two.sided	FALSE	TRUE	0.0327516	0.415763	ORC2
AC005037.1	1244	11006	12250	6.84825e+06	0.919197	0	two.sided	FALSE	TRUE	0.960781	0.0200609	AC005037.1
FAM126B	1244	11006	12250	6971788	0.0208944	0	two.sided	FALSE	TRUE	0.0728944	0.341281	FAM126B
NDUFB3	1244	11006	12250	6.72327e+06	0.117422	0	two.sided	FALSE	TRUE	0.261154	-0.186168	NDUFB3
CFLAR	1244	11006	12250	7303118	1.72145e-05	0	two.sided	FALSE	TRUE	0.00015807	0.210165	CFLAR
CFLAR-AS1	1244	11006	12250	6833341	0.449706	0	two.sided	FALSE	TRUE	0.63657	-0.459423	CFLAR-AS1
CASP10	1244	11006	12250	6.86927e+06	0.462202	0	two.sided	FALSE	TRUE	0.646826	0.203587	CASP10
CASP8	1244	11006	12250	7667203	6.50014e-15	0	two.sided	FALSE	TRUE	2.10827e-13	0.392593	CASP8
TRAK2	1244	11006	12250	6793355	0.309433	0	two.sided	FALSE	TRUE	0.507013	-0.175906	TRAK2
STRADB	1244	11006	12250	6790436	0.0361682	0	two.sided	FALSE	TRUE	0.1111	-0.89716	STRADB
TMEM237	1244	11006	12250	6.82329e+06	0.234586	0	two.sided	FALSE	TRUE	0.421323	-0.657237	TMEM237
ALS2	1244	11006	12250	6.87354e+06	0.32825	0	two.sided	FALSE	TRUE	0.525844	0.292279	ALS2
SUMO1	1244	11006	12250	6.73394e+06	0.262188	0	two.sided	FALSE	TRUE	0.453319	-0.0688621	SUMO1
NOP58	1244	11006	12250	7341741	4.38237e-07	0	two.sided	FALSE	TRUE	5.55788e-06	0.306127	NOP58
BMPR2	1244	11006	12250	6.84743e+06	0.959928	0	two.sided	FALSE	TRUE	0.981282	0.0191045	BMPR2
FAM117B	1244	11006	12250	6946032	0.00778324	0	two.sided	FALSE	TRUE	0.0327955	0.538015	FAM117B
ICA1L	1244	11006	12250	6.82965e+06	0.494506	0	two.sided	FALSE	TRUE	0.675382	-0.106066	ICA1L
WDR12	1244	11006	12250	6833555	0.688655	0	two.sided	FALSE	TRUE	0.824947	-0.0588775	WDR12
CARF	1244	11006	12250	6.86616e+06	0.569884	0	two.sided	FALSE	TRUE	0.738493	0.0882104	CARF
NBEAL1	1244	11006	12250	6.88476e+06	0.448804	0	two.sided	FALSE	TRUE	0.635838	0.098406	NBEAL1
CYP20A1	1244	11006	12250	6885696	0.5465	0	two.sided	FALSE	TRUE	0.718103	0.0798601	CYP20A1
ABI2	1244	11006	12250	6856351	0.82348	0	two.sided	FALSE	TRUE	0.908968	0.0442181	ABI2
CD28	1244	11006	12250	6876327	0.0458982	0	two.sided	FALSE	TRUE	0.132997	0.894963	CD28
CTLA4	1244	11006	12250	6915984	0.106001	0	two.sided	FALSE	TRUE	0.242256	0.384583	CTLA4
ICOS	1244	11006	12250	7019870	1.69523e-05	0	two.sided	FALSE	TRUE	0.000156034	0.760203	ICOS
INO80D	1244	11006	12250	7160365	3.94672e-06	0	two.sided	FALSE	TRUE	4.13911e-05	0.456136	INO80D
AC007383.2	1244	11006	12250	6.89632e+06	0.13375	0	two.sided	FALSE	TRUE	0.28579	0.33747	AC007383.2
NDUFS1	1244	11006	12250	6821794	0.678435	0	two.sided	FALSE	TRUE	0.818718	-0.0318674	NDUFS1
EEF1B2	1244	11006	12250	6094530	1.50893e-10	0	two.sided	FALSE	TRUE	3.11999e-09	-0.0950263	EEF1B2
ZDBF2	1244	11006	12250	6896413	0.0177572	0	two.sided	FALSE	TRUE	0.0641932	0.701311	ZDBF2
FASTKD2	1244	11006	12250	6801894	0.409594	0	two.sided	FALSE	TRUE	0.601406	-0.0991928	FASTKD2
KLF7	1244	11006	12250	6974382	0.000146247	0	two.sided	FALSE	TRUE	0.00107997	0.796796	KLF7
CREB1	1244	11006	12250	6.81414e+06	0.638305	0	two.sided	FALSE	TRUE	0.790051	-0.048153	CREB1
METTL21A	1244	11006	12250	6885482	0.285533	0	two.sided	FALSE	TRUE	0.479647	0.260721	METTL21A
CCNYL1	1244	11006	12250	6877677	0.351086	0	two.sided	FALSE	TRUE	0.547713	0.265842	CCNYL1
PLEKHM3	1244	11006	12250	6.84873e+06	0.933505	0	two.sided	FALSE	TRUE	0.967892	0.0146001	PLEKHM3
IDH1	1244	11006	12250	6894455	0.0968819	0	two.sided	FALSE	TRUE	0.227961	0.498617	IDH1
PIKFYVE	1244	11006	12250	6.84292e+06	0.964297	0	two.sided	FALSE	TRUE	0.983219	-0.0068179	PIKFYVE
RPE	1244	11006	12250	6878294	0.281386	0	two.sided	FALSE	TRUE	0.475662	0.32872	RPE
KANSL1L	1244	11006	12250	6891063	0.00231118	0	two.sided	FALSE	TRUE	0.0119363	1.26979	KANSL1L
LANCL1	1244	11006	12250	6969136	0.0441724	0	two.sided	FALSE	TRUE	0.129353	0.236924	LANCL1
IKZF2	1244	11006	12250	6836460	0.861748	0	two.sided	FALSE	TRUE	0.92847	-0.027705	IKZF2
SPAG16	1244	11006	12250	6848924	0.919684	0	two.sided	FALSE	TRUE	0.960929	0.00945668	SPAG16
BARD1	1244	11006	12250	6918152	0.0256933	0	two.sided	FALSE	TRUE	0.0855629	0.440401	BARD1
ATIC	1244	11006	12250	6.71539e+06	0.0400013	0	two.sided	FALSE	TRUE	0.12018	-0.312701	ATIC
MREG	1244	11006	12250	6879419	0.112421	0	two.sided	FALSE	TRUE	0.253106	0.582692	MREG
PECR	1244	11006	12250	6859216	0.754192	0	two.sided	FALSE	TRUE	0.866865	0.0217507	PECR
XRCC5	1244	11006	12250	6.33907e+06	1.07844e-06	0	two.sided	FALSE	TRUE	1.27161e-05	-0.300328	XRCC5
SMARCAL1	1244	11006	12250	6.84991e+06	0.90712	0	two.sided	FALSE	TRUE	0.95372	0.0155909	SMARCAL1
RPL37A	1244	11006	12250	6512798	0.00469916	0	two.sided	FALSE	TRUE	0.0217039	-0.0335643	RPL37A
CXCR2	1244	11006	12250	6850748	0.856194	0	two.sided	FALSE	TRUE	0.926248	-0.00182046	CXCR2
CXCR1	1244	11006	12250	6849588	0.843192	0	two.sided	FALSE	TRUE	0.918938	0.111756	CXCR1
ARPC2	1244	11006	12250	4.95347e+06	1.01501e-58	0	two.sided	FALSE	TRUE	1.70331e-56	-0.310876	ARPC2
AAMP	1244	11006	12250	6707532	0.0504405	0	two.sided	FALSE	TRUE	0.142098	-0.22939	AAMP
PNKD	1244	11006	12250	6.46001e+06	1.73907e-06	0	two.sided	FALSE	TRUE	1.96456e-05	-0.508592	PNKD
TMBIM1	1244	11006	12250	6699591	0.0758489	0	two.sided	FALSE	TRUE	0.19158	-0.175149	TMBIM1
SLC11A1	1244	11006	12250	6.88618e+06	0.064965	0	two.sided	FALSE	TRUE	0.17146	0.732367	SLC11A1
CTDSP1	1244	11006	12250	6108442	2.85132e-14	0	two.sided	FALSE	TRUE	8.7574e-13	-0.615751	CTDSP1
USP37	1244	11006	12250	6.94293e+06	0.0211091	0	two.sided	FALSE	TRUE	0.0734442	0.41331	USP37
CNOT9	1244	11006	12250	6920281	0.148887	0	two.sided	FALSE	TRUE	0.308733	0.227999	CNOT9
ZNF142	1244	11006	12250	6892380	0.351195	0	two.sided	FALSE	TRUE	0.547749	0.134701	ZNF142
BCS1L	1244	11006	12250	6.81628e+06	0.463063	0	two.sided	FALSE	TRUE	0.647717	-0.186671	BCS1L
RNF25	1244	11006	12250	6951539	0.0246371	0	two.sided	FALSE	TRUE	0.0828318	0.345561	RNF25
STK36	1244	11006	12250	6.83947e+06	0.702262	0	two.sided	FALSE	TRUE	0.832273	-0.223709	STK36
TTLL4	1244	11006	12250	6820682	0.306668	0	two.sided	FALSE	TRUE	0.504248	-0.460387	TTLL4
NHEJ1	1244	11006	12250	6838740	0.689308	0	two.sided	FALSE	TRUE	0.825472	-0.237957	NHEJ1
CNPPD1	1244	11006	12250	6.56745e+06	0.00164443	0	two.sided	FALSE	TRUE	0.00894777	-0.284653	CNPPD1
RETREG2	1244	11006	12250	6.52515e+06	5.5069e-05	0	two.sided	FALSE	TRUE	0.000446217	-0.420826	RETREG2
ZFAND2B	1244	11006	12250	6.64828e+06	0.020355	0	two.sided	FALSE	TRUE	0.0713997	-0.190954	ZFAND2B
ATG9A	1244	11006	12250	6884173	0.347349	0	two.sided	FALSE	TRUE	0.544316	0.20803	ATG9A
ANKZF1	1244	11006	12250	6853812	0.895109	0	two.sided	FALSE	TRUE	0.947126	0.0180581	ANKZF1
STK16	1244	11006	12250	6901894	0.342809	0	two.sided	FALSE	TRUE	0.539538	0.0951159	STK16
TUBA4A	1244	11006	12250	7.03578e+06	0.04793	0	two.sided	FALSE	TRUE	0.136897	0.159218	TUBA4A
DNAJB2	1244	11006	12250	7061533	5.6181e-05	0	two.sided	FALSE	TRUE	0.00045364	0.546103	DNAJB2
DNPEP	1244	11006	12250	6777827	0.367612	0	two.sided	FALSE	TRUE	0.563188	-0.0905113	DNPEP
GMPPA	1244	11006	12250	6787149	0.236559	0	two.sided	FALSE	TRUE	0.423115	-0.226579	GMPPA
CHPF	1244	11006	12250	6856381	0.769029	0	two.sided	FALSE	TRUE	0.875313	0.108373	CHPF
STK11IP	1244	11006	12250	6869161	0.489834	0	two.sided	FALSE	TRUE	0.671695	0.135271	STK11IP
EPHA4	1244	11006	12250	6839644	0.803273	0	two.sided	FALSE	TRUE	0.896232	-0.163177	EPHA4
FARSB	1244	11006	12250	6874354	0.497474	0	two.sided	FALSE	TRUE	0.678395	0.102389	FARSB
ACSL3	1244	11006	12250	6869563	0.681323	0	two.sided	FALSE	TRUE	0.820333	0.080506	ACSL3
AP1S3	1244	11006	12250	6869126	0.0760296	0	two.sided	FALSE	TRUE	0.191756	0.859577	AP1S3
WDFY1	1244	11006	12250	7025032	0.00795515	0	two.sided	FALSE	TRUE	0.03335	0.263985	WDFY1
MRPL44	1244	11006	12250	6689566	0.0378692	0	two.sided	FALSE	TRUE	0.115028	-0.221292	MRPL44
CUL3	1244	11006	12250	7.32311e+06	9.24992e-08	0	two.sided	FALSE	TRUE	1.30139e-06	0.395791	CUL3
DOCK10	1244	11006	12250	6997880	0.0667087	0	two.sided	FALSE	TRUE	0.174283	0.170561	DOCK10
RHBDD1	1244	11006	12250	6.8124e+06	0.284398	0	two.sided	FALSE	TRUE	0.478361	-0.28637	RHBDD1
MFF	1244	11006	12250	6918906	0.399187	0	two.sided	FALSE	TRUE	0.592057	0.0661341	MFF
AGFG1	1244	11006	12250	6.97961e+06	0.0369666	0	two.sided	FALSE	TRUE	0.112998	0.239996	AGFG1
TRIP12	1244	11006	12250	6915747	0.342636	0	two.sided	FALSE	TRUE	0.539413	0.0813204	TRIP12
FBXO36	1244	11006	12250	6859829	0.347027	0	two.sided	FALSE	TRUE	0.543959	0.545906	FBXO36
SP110	1244	11006	12250	7006426	0.104078	0	two.sided	FALSE	TRUE	0.239159	0.113464	SP110
SP140	1244	11006	12250	7120234	0.00149645	0	two.sided	FALSE	TRUE	0.00825899	0.272872	SP140
SP140L	1244	11006	12250	7.03076e+06	0.0208439	0	two.sided	FALSE	TRUE	0.0727677	0.226395	SP140L
SP100	1244	11006	12250	7.2436e+06	0.000182471	0	two.sided	FALSE	TRUE	0.00131559	0.174751	SP100
CAB39	1244	11006	12250	6.94787e+06	0.188462	0	two.sided	FALSE	TRUE	0.364126	0.110679	CAB39
ITM2C	1244	11006	12250	6.78045e+06	0.119159	0	two.sided	FALSE	TRUE	0.263461	-0.45797	ITM2C
GPR55	1244	11006	12250	6859782	0.494808	0	two.sided	FALSE	TRUE	0.675634	0.193533	GPR55
PSMD1	1244	11006	12250	6747411	0.135946	0	two.sided	FALSE	TRUE	0.288459	-0.197246	PSMD1
B3GNT7	1244	11006	12250	6819317	0.0915077	0	two.sided	FALSE	TRUE	0.219281	-1.37438	B3GNT7
NCL	1244	11006	12250	6019395	6.94425e-13	0	two.sided	FALSE	TRUE	1.83945e-11	-0.226414	NCL
NMUR1	1244	11006	12250	6.8339e+06	0.803167	0	two.sided	FALSE	TRUE	0.896201	-0.0486248	NMUR1
PTMA	1244	11006	12250	6429102	0.000413113	0	two.sided	FALSE	TRUE	0.00270251	-0.0289622	PTMA
PDE6D	1244	11006	12250	6640056	0.00177382	0	two.sided	FALSE	TRUE	0.00954859	-0.427902	PDE6D
COPS7B	1244	11006	12250	6.77104e+06	0.176419	0	two.sided	FALSE	TRUE	0.347939	-0.199217	COPS7B
DIS3L2	1244	11006	12250	6772025	0.186098	0	two.sided	FALSE	TRUE	0.360883	-0.182935	DIS3L2
TIGD1	1244	11006	12250	6.81038e+06	0.354084	0	two.sided	FALSE	TRUE	0.55055	-0.214501	TIGD1
EIF4E2	1244	11006	12250	6.85648e+06	0.893563	0	two.sided	FALSE	TRUE	0.945669	0.0101932	EIF4E2
AC073254.1	1244	11006	12250	6862712	0.450881	0	two.sided	FALSE	TRUE	0.637412	0.288465	AC073254.1
EFHD1	1244	11006	12250	6827406	0.196148	0	two.sided	FALSE	TRUE	0.374484	-1.06269	EFHD1
GIGYF2	1244	11006	12250	6.91589e+06	0.213236	0	two.sided	FALSE	TRUE	0.396573	0.178448	GIGYF2
INPP5D	1244	11006	12250	6632678	0.0263366	0	two.sided	FALSE	TRUE	0.0870047	-0.169837	INPP5D
ATG16L1	1244	11006	12250	7003882	0.00539682	0	two.sided	FALSE	TRUE	0.0242302	0.394303	ATG16L1
DGKD	1244	11006	12250	7.07307e+06	0.0063337	0	two.sided	FALSE	TRUE	0.0275914	0.237595	DGKD
USP40	1244	11006	12250	6821332	0.318046	0	two.sided	FALSE	TRUE	0.515273	-0.439255	USP40
ARL4C	1244	11006	12250	6.20381e+06	4.10721e-08	0	two.sided	FALSE	TRUE	5.99715e-07	-0.117412	ARL4C
AGAP1	1244	11006	12250	6659467	0.00491646	0	two.sided	FALSE	TRUE	0.0225099	-0.374755	AGAP1
COPS8	1244	11006	12250	6840670	0.941158	0	two.sided	FALSE	TRUE	0.971619	0.00287486	COPS8
COL6A3	1244	11006	12250	6855804	0.665845	0	two.sided	FALSE	TRUE	0.80909	0.130508	COL6A3
LRRFIP1	1244	11006	12250	6125485	2.13935e-10	0	two.sided	FALSE	TRUE	4.30809e-09	-0.252914	LRRFIP1
RBM44	1244	11006	12250	6.83779e+06	0.584741	0	two.sided	FALSE	TRUE	0.749969	-0.368825	RBM44
RAMP1	1244	11006	12250	6841816	0.859193	0	two.sided	FALSE	TRUE	0.927952	-0.164565	RAMP1
UBE2F	1244	11006	12250	6.87823e+06	0.551723	0	two.sided	FALSE	TRUE	0.723355	0.102667	UBE2F
SCLY	1244	11006	12250	6801998	0.114061	0	two.sided	FALSE	TRUE	0.255704	-0.537927	SCLY
ILKAP	1244	11006	12250	7.04192e+06	0.0122769	0	two.sided	FALSE	TRUE	0.0473688	0.234788	ILKAP
HES6	1244	11006	12250	6776454	0.103518	0	two.sided	FALSE	TRUE	0.238588	-0.376144	HES6
PER2	1244	11006	12250	6981207	7.975e-06	0	two.sided	FALSE	TRUE	7.84558e-05	1.01024	PER2
TRAF3IP1	1244	11006	12250	6873366	0.46739	0	two.sided	FALSE	TRUE	0.651492	0.14971	TRAF3IP1
ASB1	1244	11006	12250	6900648	0.346965	0	two.sided	FALSE	TRUE	0.543959	0.12453	ASB1
HDAC4	1244	11006	12250	6.91325e+06	0.115048	0	two.sided	FALSE	TRUE	0.257318	0.317978	HDAC4
AC062017.1	1244	11006	12250	6.86446e+06	0.487083	0	two.sided	FALSE	TRUE	0.669587	0.192748	AC062017.1
NDUFA10	1244	11006	12250	6.87066e+06	0.775414	0	two.sided	FALSE	TRUE	0.879309	0.0128562	NDUFA10
COPS9	1244	11006	12250	6853898	0.93628	0	two.sided	FALSE	TRUE	0.968969	-0.002191	COPS9
ANKMY1	1244	11006	12250	6878916	0.451708	0	two.sided	FALSE	TRUE	0.638	0.148163	ANKMY1
DUSP28	1244	11006	12250	6773286	0.134861	0	two.sided	FALSE	TRUE	0.287055	-0.220462	DUSP28
RNPEPL1	1244	11006	12250	5.74479e+06	2.40736e-26	0	two.sided	FALSE	TRUE	1.51494e-24	-0.720921	RNPEPL1
CAPN10-DT	1244	11006	12250	6830614	0.217195	0	two.sided	FALSE	TRUE	0.400678	-1.17664	CAPN10-DT
CAPN10	1244	11006	12250	6.84582e+06	0.998724	0	two.sided	FALSE	TRUE	0.999414	0.0063634	CAPN10
MTERF4	1244	11006	12250	6.90354e+06	0.388246	0	two.sided	FALSE	TRUE	0.582452	0.0558232	MTERF4
PASK	1244	11006	12250	6893956	0.119509	0	two.sided	FALSE	TRUE	0.263897	0.405705	PASK
PPP1R7	1244	11006	12250	6.52151e+06	0.000364189	0	two.sided	FALSE	TRUE	0.0024152	-0.299442	PPP1R7
HDLBP	1244	11006	12250	6800276	0.489184	0	two.sided	FALSE	TRUE	0.671414	-0.112236	HDLBP
SEPT2	1244	11006	12250	7.07175e+06	0.0183097	0	two.sided	FALSE	TRUE	0.0658207	0.16229	SEPT2
FARP2	1244	11006	12250	6.85051e+06	0.873353	0	two.sided	FALSE	TRUE	0.933926	0.057787	FARP2
STK25	1244	11006	12250	6787327	0.407941	0	two.sided	FALSE	TRUE	0.600196	-0.108995	STK25
BOK	1244	11006	12250	6.81537e+06	0.0960842	0	two.sided	FALSE	TRUE	0.22696	-1.14049	BOK
THAP4	1244	11006	12250	6.73828e+06	0.109306	0	two.sided	FALSE	TRUE	0.247563	-0.177044	THAP4
ATG4B	1244	11006	12250	6873918	0.710005	0	two.sided	FALSE	TRUE	0.836689	0.0501212	ATG4B
DTYMK	1244	11006	12250	6682377	0.000845205	0	two.sided	FALSE	TRUE	0.00507079	-0.68697	DTYMK
ING5	1244	11006	12250	6809615	0.555098	0	two.sided	FALSE	TRUE	0.726303	-0.0549314	ING5
D2HGDH	1244	11006	12250	6841628	0.936983	0	two.sided	FALSE	TRUE	0.969035	0.00368773	D2HGDH
GAL3ST2	1244	11006	12250	6.88344e+06	0.0283185	0	two.sided	FALSE	TRUE	0.0918487	0.774428	GAL3ST2
PDCD1	1244	11006	12250	6.91296e+06	0.119728	0	two.sided	FALSE	TRUE	0.264263	0.303393	PDCD1
RTP5	1244	11006	12250	6825317	0.558701	0	two.sided	FALSE	TRUE	0.728676	-0.204547	RTP5
IL5RA	1244	11006	12250	7011885	1.6451e-09	0	two.sided	FALSE	TRUE	2.92605e-08	1.40255	IL5RA
TRNT1	1244	11006	12250	7.2946e+06	6.84099e-15	0	two.sided	FALSE	TRUE	2.20646e-13	0.919161	TRNT1
CRBN	1244	11006	12250	7.0783e+06	0.0139798	0	two.sided	FALSE	TRUE	0.0528457	0.169668	CRBN
SUMF1	1244	11006	12250	6.68696e+06	0.00167056	0	two.sided	FALSE	TRUE	0.00906926	-0.607025	SUMF1
SETMAR	1244	11006	12250	6833138	0.492162	0	two.sided	FALSE	TRUE	0.673689	-0.397811	SETMAR
ITPR1	1244	11006	12250	6.86369e+06	0.712952	0	two.sided	FALSE	TRUE	0.839036	0.0862685	ITPR1
AC018816.1	1244	11006	12250	6.833e+06	0.329583	0	two.sided	FALSE	TRUE	0.527105	-0.839692	AC018816.1
BHLHE40	1244	11006	12250	7726361	5.33163e-16	0	two.sided	FALSE	TRUE	1.9054e-14	0.386095	BHLHE40
ARL8B	1244	11006	12250	6931011	0.267885	0	two.sided	FALSE	TRUE	0.460045	0.132741	ARL8B
EDEM1	1244	11006	12250	6918848	0.0908649	0	two.sided	FALSE	TRUE	0.218328	0.341928	EDEM1
LMCD1	1244	11006	12250	6862388	0.210924	0	two.sided	FALSE	TRUE	0.393854	0.666663	LMCD1
RAD18	1244	11006	12250	6868524	0.585711	0	two.sided	FALSE	TRUE	0.750963	0.0852576	RAD18
THUMPD3-AS1	1244	11006	12250	6.99384e+06	0.018573	0	two.sided	FALSE	TRUE	0.0666082	0.288276	THUMPD3-AS1
THUMPD3	1244	11006	12250	6.99611e+06	0.0108897	0	two.sided	FALSE	TRUE	0.0429029	0.345593	THUMPD3
SETD5	1244	11006	12250	7.03612e+06	0.00861933	0	two.sided	FALSE	TRUE	0.0357461	0.257823	SETD5
MTMR14	1244	11006	12250	6952704	0.141524	0	two.sided	FALSE	TRUE	0.297513	0.183566	MTMR14
BRPF1	1244	11006	12250	6.8768e+06	0.571789	0	two.sided	FALSE	TRUE	0.739803	0.0971873	BRPF1
OGG1	1244	11006	12250	6733623	0.0192221	0	two.sided	FALSE	TRUE	0.0681789	-0.487881	OGG1
CAMK1	1244	11006	12250	6856907	0.39672	0	two.sided	FALSE	TRUE	0.589985	0.591536	CAMK1
TADA3	1244	11006	12250	6293806	7.53345e-10	0	two.sided	FALSE	TRUE	1.41377e-08	-0.54384	TADA3
ARPC4	1244	11006	12250	6.86622e+06	0.769539	0	two.sided	FALSE	TRUE	0.875354	0.0210333	ARPC4
ARPC4-TTLL3	1244	11006	12250	6821367	0.318739	0	two.sided	FALSE	TRUE	0.515963	-0.407051	ARPC4-TTLL3
TTLL3	1244	11006	12250	6.88099e+06	0.299348	0	two.sided	FALSE	TRUE	0.496015	0.240096	TTLL3
RPUSD3	1244	11006	12250	6580186	1.05694e-05	0	two.sided	FALSE	TRUE	0.000101479	-0.738631	RPUSD3
JAGN1	1244	11006	12250	6.788e+06	0.327374	0	two.sided	FALSE	TRUE	0.524886	-0.144546	JAGN1
IL17RC	1244	11006	12250	6.78989e+06	0.0666276	0	two.sided	FALSE	TRUE	0.174149	-0.590731	IL17RC
CRELD1	1244	11006	12250	6791078	0.261739	0	two.sided	FALSE	TRUE	0.453219	-0.223189	CRELD1
PRRT3	1244	11006	12250	6828336	0.535726	0	two.sided	FALSE	TRUE	0.708852	-0.15349	PRRT3
EMC3	1244	11006	12250	6.59109e+06	0.00456573	0	two.sided	FALSE	TRUE	0.0211805	-0.243824	EMC3
FANCD2	1244	11006	12250	6840351	0.82525	0	two.sided	FALSE	TRUE	0.910141	-0.100242	FANCD2
BRK1	1244	11006	12250	5686384	8.58747e-28	0	two.sided	FALSE	TRUE	6.02632e-26	-0.666856	BRK1
VHL	1244	11006	12250	6.80964e+06	0.649556	0	two.sided	FALSE	TRUE	0.798325	-0.0184614	VHL
IRAK2	1244	11006	12250	6.85733e+06	0.578966	0	two.sided	FALSE	TRUE	0.745784	0.180384	IRAK2
TATDN2	1244	11006	12250	6.82243e+06	0.671363	0	two.sided	FALSE	TRUE	0.81281	-0.0366934	TATDN2
LINC00852	1244	11006	12250	6826690	0.217342	0	two.sided	FALSE	TRUE	0.400797	-0.882572	LINC00852
SEC13	1244	11006	12250	6748723	0.24527	0	two.sided	FALSE	TRUE	0.434116	-0.114501	SEC13
ATG7	1244	11006	12250	6.81094e+06	0.422941	0	two.sided	FALSE	TRUE	0.61315	-0.158948	ATG7
VGLL4	1244	11006	12250	6773067	0.259999	0	two.sided	FALSE	TRUE	0.450948	-0.144039	VGLL4
TAMM41	1244	11006	12250	6962839	0.00534078	0	two.sided	FALSE	TRUE	0.024009	0.47664	TAMM41
TSEN2	1244	11006	12250	6.84098e+06	0.845023	0	two.sided	FALSE	TRUE	0.919793	-0.0861391	TSEN2
MKRN2	1244	11006	12250	6744004	0.0316567	0	two.sided	FALSE	TRUE	0.100002	-0.46225	MKRN2
RAF1	1244	11006	12250	6.9644e+06	0.0770524	0	two.sided	FALSE	TRUE	0.19366	0.214168	RAF1
RPL32	1244	11006	12250	6.12348e+06	9.58656e-10	0	two.sided	FALSE	TRUE	1.78175e-08	-0.0311188	RPL32
IQSEC1	1244	11006	12250	6860427	0.841622	0	two.sided	FALSE	TRUE	0.918284	0.0361485	IQSEC1
NUP210	1244	11006	12250	6666580	0.0423559	0	two.sided	FALSE	TRUE	0.125449	-0.202881	NUP210
HDAC11	1244	11006	12250	6847678	0.921521	0	two.sided	FALSE	TRUE	0.961927	0.0111199	HDAC11
CHCHD4	1244	11006	12250	6.82476e+06	0.338584	0	two.sided	FALSE	TRUE	0.535053	-0.458684	CHCHD4
TMEM43	1244	11006	12250	6797139	0.439515	0	two.sided	FALSE	TRUE	0.627825	-0.107564	TMEM43
AC093495.1	1244	11006	12250	6.90351e+06	0.0168015	0	two.sided	FALSE	TRUE	0.0615842	0.706657	AC093495.1
XPC	1244	11006	12250	6.86198e+06	0.794835	0	two.sided	FALSE	TRUE	0.891379	0.0186535	XPC
LSM3	1244	11006	12250	6.81493e+06	0.730369	0	two.sided	FALSE	TRUE	0.851439	-0.0257857	LSM3
SLC6A6	1244	11006	12250	6770784	0.122616	0	two.sided	FALSE	TRUE	0.268951	-0.267318	SLC6A6
CCDC174	1244	11006	12250	6.8649e+06	0.752461	0	two.sided	FALSE	TRUE	0.865599	0.0619388	CCDC174
FGD5-AS1	1244	11006	12250	6.70753e+06	0.0398966	0	two.sided	FALSE	TRUE	0.120102	-0.298509	FGD5-AS1
NR2C2	1244	11006	12250	6.86084e+06	0.803445	0	two.sided	FALSE	TRUE	0.896338	0.0592697	NR2C2
MRPS25	1244	11006	12250	6.8732e+06	0.605598	0	two.sided	FALSE	TRUE	0.766027	0.0704806	MRPS25
RBSN	1244	11006	12250	6.90639e+06	0.240739	0	two.sided	FALSE	TRUE	0.428519	0.180611	RBSN
CAPN7	1244	11006	12250	7047375	0.0157674	0	two.sided	FALSE	TRUE	0.0585725	0.193567	CAPN7
[truncated: 9,581 more rows]
