# Supplementary material for: Deciphering Cell Fate and Clonal Dynamics via Integrative Single-Cell Lineage Modeling
Source: Research Square preprint supplement (doi:10.21203/rs.3.rs-7510946/v1), 2025-09-24
Supplement: Supplementary file 3 [file 8c97d28f8bfb5c15e8a1b9ae.xlsx]

## Sheet: cluster 1
Description: This table records the significant differentially expressed genes for profile 1 in cluster 1
gene	stat	pval	mean_diff	cohen	pcali	padj
1700020L24Rik	22.3638	2.14639e-10	-0.354872	-0.370073	0	0
1810037I17Rik	43.8588	1.32243e-19	-0.798544	-0.550923	0	0
4921529L05Rik	16.2465	9.28069e-08	0.0656364	0.357499	0	0
AI506816	19.0906	5.51181e-09	0.673608	0.396221	0	0
Afap1l1	17.2107	3.56213e-08	0.0272266	0.312877	0	0
Agpat2	22.4584	1.95442e-10	-0.227625	-0.343915	0	0
Aldh2	57.4705	2.13788e-25	-0.663435	-0.590513	0	0
Alox5	30.0101	1.11223e-13	-0.26956	-0.434665	0	0
Als2	15.6272	1.7171e-07	0.330373	0.358673	0	0
Anp32b	20.8038	1.00757e-09	0.719955	0.391013	0	0
Apex1	33.6816	2.96635e-15	0.374641	0.470013	0	0
Arhgdia	16.1342	1.03764e-07	0.359249	0.365538	0	0
Arhgdib	20.9011	9.14955e-10	-0.417296	-0.306412	0	0
Atp2a2	17.0439	4.20353e-08	0.339318	0.360603	0	0
B2m	32.583	8.76882e-15	-2.0343	-0.517152	0	0
Bnip3l	29.6915	1.52373e-13	-0.760672	-0.481384	0	0
Bzw2	21.6607	4.3087e-10	0.223774	0.369087	0	0
C1qbp	66.3256	3.79599e-29	0.999447	0.661521	0	0
Cacybp	33.4464	3.74085e-15	0.559401	0.422211	0	0
Calm2	16.6878	5.98712e-08	0.443028	0.346637	0	0
Calr	38.7715	1.96796e-17	2.24221	0.51046	0	0
Cct3	27.7438	1.04453e-12	0.489971	0.461569	0	0
Cct8	16.633	6.32205e-08	0.407544	0.352854	0	0
Cd33	23.9446	4.48348e-11	-0.306713	-0.386785	0	0
Cd47	21.9458	3.24791e-10	-1.30488	-0.420112	0	0
Cd63	69.899	1.1736e-30	-1.08552	-0.603397	0	0
Cdv3	17.2484	3.43127e-08	0.192646	0.330388	0	0
Ceacam1	55.3363	1.72161e-24	-0.456092	-0.575147	0	0
Cebpe	30.4929	6.9034e-14	-0.259949	-0.42974	0	0
Chil3	15.4954	1.95752e-07	0.0770804	0.113238	0	0
Cited2	22.6706	1.5838e-10	-0.450044	-0.385746	0	0
Cited4	17.1161	3.91281e-08	0.0707511	0.349307	0	0
Cpne2	34.9696	8.32874e-16	-0.491122	-0.525085	0	0
Ctsc	73.9341	2.32921e-32	0.702184	0.720076	0	0
Ctsz	21.5375	4.86849e-10	0.291554	0.410894	0	0
Cybb	32.7234	7.63452e-15	0.633013	0.42846	0	0
Cyfip2	20.9939	8.34481e-10	-0.235622	-0.329711	0	0
Cyp11a1	76.0661	2.94371e-33	-0.583632	-0.685311	0	0
Cystm1	17.533	2.58658e-08	-0.128086	-0.350092	0	0
Dach1	36.9918	1.13525e-16	-0.212342	-0.445832	0	0
Ddx21	18.0503	1.54767e-08	0.143479	0.225904	0	0
Ddx39	16.0976	1.07608e-07	0.308104	0.358756	0	0
Dmkn	30.899	4.62263e-14	0.794378	0.48427	0	0
Dstn	17.4796	2.72723e-08	-0.542399	-0.285324	0	0
Dynll1	18.3771	1.11898e-08	0.576215	0.326332	0	0
Eef1a1	22.7013	1.5364e-10	-4.89092	-0.419518	0	0
Eef1e1	18.0674	1.52165e-08	0.180575	0.347221	0	0
Eif1a	16.8066	5.32082e-08	0.16534	0.346347	0	0
Eif4g2	48.5011	1.38876e-21	1.84979	0.575466	0	0
Eif5a	85.0816	4.77014e-37	2.32873	0.810434	0	0
Elane	229.622	4.89346e-96	-9.0003	-0.951035	0	0
Elovl6	22.1978	2.53035e-10	0.188802	0.343356	0	0
Emg1	16.9477	4.62518e-08	0.219725	0.355298	0	0
F13a1	23.8977	4.69678e-11	0.142868	0.384694	0	0
Fabp5	160.282	3.79374e-68	1.97516	1.0002	0	0
Fam136a	16.9703	4.52246e-08	0.15251	0.308727	0	0
Far2	27.2277	1.7402e-12	-0.132751	-0.364136	0	0
Fcgr3	17.4683	2.75817e-08	-0.633934	-0.35513	0	0
Fcnb	53.8987	7.02449e-24	-0.363576	-0.572149	0	0
Fkbp1a	44.7886	5.30573e-20	0.671119	0.593435	0	0
Fkbp4	34.9866	8.19019e-16	0.769853	0.525269	0	0
Fth1	80.2761	4.97946e-35	1.80623	0.683888	0	0
G0s2	21.0899	7.58765e-10	-0.3908	-0.397624	0	0
G3bp1	15.5369	1.87832e-07	0.397254	0.297596	0	0
Gatm	32.6064	8.5684e-15	-0.44041	-0.478174	0	0
Gchfr	16.7107	5.85247e-08	-0.135265	-0.336086	0	0
Gclm	17.3873	2.98899e-08	0.483959	0.359502	0	0
Gda	16.2335	9.40165e-08	0.489918	0.334211	0	0
Gfi1	53.0429	1.623e-23	-0.943237	-0.627776	0	0
Gm10053	30.7946	5.12478e-14	0.49143	0.446378	0	0
Gnas	27.8557	9.35149e-13	-0.851725	-0.429578	0	0
Got2	16.3001	8.7995e-08	0.248582	0.360226	0	0
Gpi1	31.0756	3.88285e-14	-0.757824	-0.450029	0	0
Gpx1	21.1296	7.29426e-10	-0.760827	-0.235574	0	0
Grn	27.3481	1.54487e-12	-0.93132	-0.449167	0	0
Gsn	37.7268	5.50412e-17	-0.753282	-0.515394	0	0
Gstm1	45.9374	1.71758e-20	-2.85321	-0.558405	0	0
H2-Q7	44.9611	4.47925e-20	-0.807245	-0.604764	0	0
H2afv	15.6684	1.64826e-07	-0.182	-0.323905	0	0
H2afy	35.2709	6.1883e-16	2.19623	0.475712	0	0
Hdgf	20.626	1.20182e-09	0.65409	0.408772	0	0
Hint1	16.0399	1.13957e-07	0.58402	0.34981	0	0
Hmgb1	31.704	2.08795e-14	0.755321	0.420239	0	0
Hmgcs1	31.9715	1.6034e-14	0.309376	0.428562	0	0
Hnrnpa2b1	20.174	1.88159e-09	0.740972	0.278755	0	0
Hnrnpa3	23.194	9.42953e-11	0.587091	0.405788	0	0
Hnrnpab	35.5399	4.74693e-16	0.963275	0.535601	0	0
Hp	20.1151	1.99486e-09	0.329521	0.375324	0	0
Hsd11b1	28.3268	5.86966e-13	-0.316599	-0.403094	0	0
Hsp90aa1	23.8225	5.05992e-11	0.727668	0.396127	0	0
Hsp90ab1	29.1363	2.63733e-13	1.2621	0.461333	0	0
Hspa5	24.5847	2.37901e-11	0.782983	0.369031	0	0
Hspa9	22.5122	1.85301e-10	0.368094	0.400538	0	0
Hspd1	84.6609	7.16302e-37	1.09136	0.782682	0	0
Hspe1	34.2816	1.64135e-15	0.900664	0.498202	0	0
Hsph1	27.3508	1.54061e-12	0.262867	0.425413	0	0
Idi1	17.1645	3.72929e-08	0.418705	0.295405	0	0
Ifrd1	34.5017	1.32111e-15	0.365054	0.508275	0	0
Igsf8	31.0762	3.88081e-14	0.284283	0.489286	0	0
Il6ra	31.0268	4.07489e-14	0.134155	0.488238	0	0
Il6st	17.9505	1.70885e-08	0.0665745	0.377937	0	0
Irf8	26.4083	3.91349e-12	0.0762223	0.435624	0	0
Isca1	19.8866	2.50217e-09	0.0257594	0.3216	0	0
Itch	20.1464	1.93373e-09	0.323666	0.407104	0	0
Itgam	31.25	3.26892e-14	-0.485288	-0.475977	0	0
Itgb2	34.3734	1.49929e-15	-0.719422	-0.465887	0	0
Itgb2l	22.8585	1.3147e-10	-0.128977	-0.332008	0	0
Itm2b	153.27	2.75901e-65	-4.63723	-1.01825	0	0
Ivns1abp	22.0991	2.79026e-10	0.216069	0.337541	0	0
Kpnb1	17.4698	2.75414e-08	0.54807	0.362427	0	0
Lamc1	24.593	2.35944e-11	0.0937987	0.438887	0	0
Lipg	79.5956	9.62422e-35	-1.16579	-0.754956	0	0
Lmo2	20.9235	8.94831e-10	0.36907	0.404695	0	0
Lpl	68.4678	4.72007e-30	0.31666	0.685175	0	0
Lrrc59	25.6987	7.89755e-12	0.298516	0.42661	0	0
Lta4h	36.9697	1.16028e-16	-0.725502	-0.510526	0	0
Ltb4r1	16.5232	7.05041e-08	-0.107218	-0.305638	0	0
Ly6c2	26.494	3.59562e-12	-0.334428	-0.375046	0	0
Manf	28.4264	5.31933e-13	0.785596	0.38834	0	0
Mgst2	26.2593	4.53508e-12	-0.411512	-0.433192	0	0
Milr1	64.6428	1.95471e-28	0.392993	0.705032	0	0
Mpeg1	16.1846	9.87002e-08	0.106079	0.309754	0	0
Mpo	51.6394	6.41327e-23	-2.04833	-0.486422	0	0
Mpp1	17.7168	2.155e-08	-0.597859	-0.350228	0	0
Ms4a6c	22.6543	1.60951e-10	0.0944843	0.373484	0	0
Ms4a6d	15.5447	1.86382e-07	0.061482	0.292827	0	0
Msrb1	37.6469	5.95504e-17	-0.618249	-0.397202	0	0
Mt1	85.6863	2.65932e-37	0.794194	0.830724	0	0
Mt2	37.5481	6.56372e-17	0.122791	0.554262	0	0
Myc	21.8004	3.75144e-10	0.513116	0.419514	0	0
Myl12b	31.8519	1.8043e-14	-0.601215	-0.464161	0	0
Naa50	17.0688	4.10096e-08	0.314489	0.343479	0	0
Nap1l1	18.8214	7.19976e-09	0.313769	0.248762	0	0
Ncl	34.1508	1.86734e-15	0.765838	0.513032	0	0
Ndrg2	36.2877	2.27183e-16	-0.398763	-0.512308	0	0
Ndufaf4	21.9292	3.30197e-10	0.140814	0.416701	0	0
Ngp	49.8515	3.69624e-22	-2.4701	-0.463534	0	0
Nhp2	21.3992	5.5836e-10	0.313529	0.415955	0	0
Nhp2l1	18.3106	1.1953e-08	0.434028	0.374421	0	0
Nkg7	34.5247	1.29156e-15	-0.279599	-0.379072	0	0
Nme1	17.6927	2.20719e-08	0.422827	0.369771	0	0
Nolc1	30.7867	5.1649e-14	0.38149	0.436021	0	0
Nop56	21.9573	3.21138e-10	0.371622	0.380551	0	0
Npm1	70.3039	7.91718e-31	2.34626	0.652433	0	0
Npm3	22.7734	1.43036e-10	0.508017	0.42711	0	0
Nrp2	20.4515	1.42898e-09	0.0571614	0.3685	0	0
Nt5c3	27.7087	1.08143e-12	-0.327815	-0.44361	0	0
Nutf2-ps1	24.3422	3.0244e-11	0.268647	0.305846	0	0
Odc1	16.9877	4.4451e-08	0.247394	0.32776	0	0
Pa2g4	45.439	2.80152e-20	0.721441	0.587381	0	0
Pcbp1	22.6192	1.66645e-10	0.762064	0.395779	0	0
Pdap1	15.5928	1.77682e-07	0.216332	0.262374	0	0
Pdxk	39.7615	7.42738e-18	0.315997	0.5678	0	0
Pgam1	28.3873	5.52904e-13	0.91878	0.357165	0	0
Pglyrp1	24.8272	1.87121e-11	-0.125922	-0.351224	0	0
Phb2	36.7049	1.50611e-16	0.542114	0.461195	0	0
Plac8	19.4022	4.0458e-09	0.912447	0.211108	0	0
Plin3	35.3564	5.68816e-16	-0.67555	-0.509951	0	0
Pop5	17.1767	3.68427e-08	0.124885	0.373178	0	0
Pou2f2	27.1059	1.96285e-12	0.0690863	0.46048	0	0
Ppa1	30.1787	9.41603e-14	0.320231	0.463582	0	0
Pparg	15.846	1.38167e-07	0.0416599	0.238815	0	0
Ppp1r14b	30.2014	9.20743e-14	0.368845	0.401267	0	0
Prdx1	16.9468	4.6295e-08	0.300422	0.309616	0	0
Prdx5	82.3852	6.46769e-36	-1.02062	-0.632645	0	0
Primpol	19.8192	2.67528e-09	0.00160784	0.00733165	0	0
Prss57	34.2707	1.65912e-15	-0.358524	-0.437667	0	0
Prtn3	42.1331	7.20863e-19	-0.76833	-0.163068	0	0
Psap	17.3626	3.06329e-08	0.33735	0.318779	0	0
Psmd3	19.5975	3.33317e-09	0.250418	0.360492	0	0
Ptges3	16.9318	4.69895e-08	0.329077	0.287091	0	0
Ptma	56.1319	7.90877e-25	2.67139	0.545202	0	0
Pygl	45.4504	2.77032e-20	-0.50422	-0.516481	0	0
Rac2	16.4596	7.51018e-08	-0.268476	-0.228059	0	0
Ran	73.2445	4.54934e-32	1.99579	0.669626	0	0
Rbms1	23.6035	6.2856e-11	0.508078	0.378902	0	0
Rcc1	16.4273	7.75533e-08	0.213428	0.282825	0	0
Rpl23	28.5646	4.63992e-13	-2.56833	-0.445101	0	0
Rpl26	16.4547	7.54694e-08	-0.782605	-0.345375	0	0
Rpl30	29.9631	1.16508e-13	-1.01215	-0.433743	0	0
Rpl34	17.198	3.60739e-08	-0.61809	-0.331243	0	0
Rpl36a	15.7714	1.4879e-07	-0.679938	-0.350976	0	0
Rpl37a	46.6441	8.5848e-21	-1.89609	-0.578875	0	0
Rpl39	18.3666	1.13064e-08	-0.426706	-0.26058	0	0
Rpl5	21.8299	3.64349e-10	-1.12481	-0.424076	0	0
Rps10	18.5233	9.67815e-09	-0.856077	-0.381256	0	0
Rps11	15.7369	1.53984e-07	-0.830076	-0.336685	0	0
Rps15a	18.2438	1.27724e-08	-0.728864	-0.3882	0	0
Rps16	23.861	4.87071e-11	-1.33334	-0.367642	0	0
Rps17	32.2628	1.2028e-14	-2.02364	-0.506142	0	0
Rps20	20.9394	8.80862e-10	-0.927446	-0.313903	0	0
Rps23	52.8405	1.97862e-23	-3.59714	-0.60948	0	0
Rps24	30.2751	8.56091e-14	-1.85174	-0.496527	0	0
Rps25	34.8964	8.95175e-16	-1.79788	-0.485874	0	0
Rps27a	31.9058	1.71091e-14	-1.92889	-0.489143	0	0
Rps27l	23.5651	6.52943e-11	0.6203	0.395712	0	0
Rps27rt	59.7507	2.30639e-26	0.65153	0.646156	0	0
Rps29	22.5549	1.77623e-10	-0.570666	-0.266251	0	0
Rps4x	15.7853	1.46758e-07	-0.644388	-0.348905	0	0
Rps6	16.497	7.23654e-08	-0.561797	-0.24223	0	0
Rps8	21.0903	7.58418e-10	-1.36874	-0.415503	0	0
Rrp9	16.9907	4.43198e-08	0.115936	0.310966	0	0
S100a11	23.9442	4.48548e-11	-0.584868	-0.382141	0	0
S100a8	24.9381	1.67661e-11	-4.52434	-0.447828	0	0
S100a9	56.8844	3.79054e-25	-10.2382	-0.67742	0	0
Saa3	20.0604	2.10605e-09	0.157732	0.400156	0	0
Scp2	16.0319	1.14862e-07	-0.362964	-0.347122	0	0
Sdf2l1	23.0147	1.12623e-10	0.543084	0.394803	0	0
Sell	21.7427	3.97235e-10	0.369077	0.356988	0	0
Sept5	17.8217	1.94195e-08	-0.144129	-0.33021	0	0
Serbp1	26.0735	5.45035e-12	0.882367	0.436835	0	0
Serpina3g	24.1446	3.67819e-11	0.270448	0.446235	0	0
Serpinb1a	26.6471	3.09003e-12	-0.6081	-0.417883	0	0
Set	63.0013	9.67827e-28	2.15664	0.640423	0	0
Slc28a2	19.9926	2.25253e-09	-0.218289	-0.385309	0	0
Slc40a1	77.6563	6.30017e-34	-0.371439	-0.666195	0	0
Slc7a1	24.961	1.63913e-11	0.282725	0.451078	0	0
Slpi	23.2171	9.21599e-11	0.987362	0.410374	0	0
Smarca4	16.5064	7.1692e-08	0.168423	0.365116	0	0
Sp100	21.1476	7.16537e-10	-0.208788	-0.296692	0	0
Spint2	43.4908	1.8983e-19	-0.641184	-0.589076	0	0
Spp1	45.6471	2.28383e-20	0.558248	0.55076	0	0
Srgn	161.297	1.46342e-68	-22.7198	-1.06909	0	0
Sri	18.8346	7.10564e-09	-0.368595	-0.355428	0	0
Srm	44.8726	4.88588e-20	0.592046	0.595213	0	0
Srsf2	40.6604	3.06743e-18	1.04258	0.524255	0	0
Ssr1	21.4159	5.49202e-10	0.308435	0.366293	0	0
Sun2	51.4478	7.73723e-23	-0.678713	-0.595791	0	0
Syncrip	15.7501	1.51974e-07	0.212619	0.25645	0	0
Syne1	64.682	1.88134e-28	-0.340827	-0.61911	0	0
Taf6l	18.422	1.07015e-08	-0.140965	-0.184383	0	0
Tbc1d8	16.528	7.01712e-08	-0.218465	-0.29099	0	0
Tcp1	16.9914	4.42876e-08	0.429235	0.344874	0	0
Tex30	19.7931	2.74552e-09	0.24673	0.380129	0	0
Tifab	27.6165	1.18475e-12	0.0777131	0.442139	0	0
Tmbim6	70.1701	9.01669e-31	-2.10391	-0.676739	0	0
Tmed3	71.9933	1.53333e-31	-0.855686	-0.599562	0	0
Tmem216	26.8706	2.47724e-12	-0.203174	-0.406769	0	0
Tmem243	22.6401	1.63243e-10	0.0549432	0.429913	0	0
Tmem248	17.294	3.27917e-08	-0.255468	-0.276821	0	0
Tmsb4x	53.1073	1.52384e-23	-3.13757	-0.630629	0	0
Tomm20	19.2483	4.71325e-09	0.443761	0.33507	0	0
Tpm4	42.9267	3.30432e-19	0.151784	0.357838	0	0
Ttf1	21.7473	3.95433e-10	0.927388	0.423573	0	0
Tuba1b	27.8461	9.44053e-13	3.22734	0.477231	0	0
Tubb4b	17.9589	1.69467e-08	0.480653	0.377828	0	0
Txndc5	30.0104	1.11195e-13	0.241028	0.34988	0	0
Uck2	23.4586	7.25579e-11	0.426888	0.399837	0	0
Usp14	35.3872	5.51801e-16	-0.431015	-0.396094	0	0
Vdac2	31.7968	1.90515e-14	1.01206	0.502677	0	0
Ybx1	33.7434	2.79093e-15	2.05731	0.432953	0	0
Ybx3	67.1288	1.73686e-29	1.10856	0.681386	0	0
Ypel5	18.6113	8.86844e-09	-0.191307	-0.316166	0	0
Ywhag	20.1231	1.97902e-09	0.511585	0.392433	0	0
Zfp706	19.9114	2.44152e-09	0.323182	0.382796	0	0
mt-Co1	36.6202	1.63718e-16	-4.31595	-0.416793	0	0
Abcb1b	15.1228	2.83463e-07	0.0359793	0.279051	1.87705e-06	6.75676e-05
Acat2	14.3857	5.89764e-07	0.229167	0.335045	1.87705e-06	6.75676e-05
Adgre5	15.1673	2.71191e-07	-0.107594	-0.311311	1.87705e-06	6.75676e-05
Adora3	14.8338	3.77783e-07	0.139174	0.347343	1.87705e-06	6.75676e-05
Akr1a1	14.1163	7.70962e-07	0.344647	0.33903	1.87705e-06	6.75676e-05
Alcam	14.3133	6.33814e-07	-0.127634	-0.257974	1.87705e-06	6.75676e-05
Anp32e	14.0143	8.53218e-07	0.297444	0.276024	1.87705e-06	6.75676e-05
Arrb2	14.3589	6.05739e-07	-0.229023	-0.309095	1.87705e-06	6.75676e-05
Atp5a1	15.2033	2.61682e-07	0.599386	0.317504	1.87705e-06	6.75676e-05
Atp5g3	15.3594	2.2408e-07	0.575473	0.305784	1.87705e-06	6.75676e-05
Cad	14.6703	4.44471e-07	0.126892	0.318244	1.87705e-06	6.75676e-05
Calm1	14.0763	8.02194e-07	0.512948	0.296261	1.87705e-06	6.75676e-05
Cisd1	14.5983	4.77453e-07	0.138667	0.304139	1.87705e-06	6.75676e-05
Csf1r	14.2249	6.92007e-07	0.105824	0.337	1.87705e-06	6.75676e-05
Cytip	14.8957	3.55257e-07	-0.318004	-0.31386	1.87705e-06	6.75676e-05
Entpd5	14.0982	7.84923e-07	-0.109112	-0.260193	1.87705e-06	6.75676e-05
Gng12	14.4336	5.62365e-07	0.331387	0.328384	1.87705e-06	6.75676e-05
Grb10	14.0406	8.3121e-07	-0.0883891	-0.33781	1.87705e-06	6.75676e-05
H3f3a	15.3206	2.32885e-07	-0.765364	-0.320642	1.87705e-06	6.75676e-05
Idh3a	14.6025	4.7546e-07	0.265896	0.336279	1.87705e-06	6.75676e-05
Ly6c1	15.3293	2.30876e-07	-0.13157	-0.284804	1.87705e-06	6.75676e-05
Map3k9	14.581	4.85733e-07	-0.0298089	-0.243004	1.87705e-06	6.75676e-05
Mif	14.3109	6.35325e-07	0.41061	0.309916	1.87705e-06	6.75676e-05
Naa20	15.3243	2.32022e-07	0.131745	0.279446	1.87705e-06	6.75676e-05
Nkiras2	14.2614	6.67333e-07	0.00283957	0.0135414	1.87705e-06	6.75676e-05
Noc2l	14.1962	7.12042e-07	0.20443	0.336277	1.87705e-06	6.75676e-05
Nsun2	15.1189	2.8458e-07	0.17449	0.265754	1.87705e-06	6.75676e-05
Pdia6	14.0326	8.37841e-07	0.381432	0.339937	1.87705e-06	6.75676e-05
Polr2f	14.3674	6.00612e-07	0.25024	0.325033	1.87705e-06	6.75676e-05
Prdx3	15.0301	3.10829e-07	0.175937	0.270842	1.87705e-06	6.75676e-05
Rexo2	14.1205	7.67737e-07	0.275903	0.320512	1.87705e-06	6.75676e-05
Rnf130	14.9491	3.36872e-07	-0.28972	-0.350552	1.87705e-06	6.75676e-05
Rpl13	14.2829	6.53225e-07	-0.676876	-0.27021	1.87705e-06	6.75676e-05
Rrbp1	14.565	4.93491e-07	0.1715	0.32373	1.87705e-06	6.75676e-05
Sp140	14.1394	7.53449e-07	-0.201803	-0.340836	1.87705e-06	6.75676e-05
St8sia4	14.4848	5.34454e-07	0.0917359	0.266054	1.87705e-06	6.75676e-05
Stip1	15.3292	2.30887e-07	0.300135	0.348753	1.87705e-06	6.75676e-05
Zfp385a	14.5435	5.04168e-07	-0.00202532	-0.010394	1.87705e-06	6.75676e-05
mt-Atp6	14.5929	4.80015e-07	-1.71559	-0.108966	1.87705e-06	6.75676e-05
mt-Co3	15.4021	2.14758e-07	-0.73323	-0.233456	1.87705e-06	6.75676e-05
2700094K13Rik	13.9553	9.04791e-07	0.388299	0.339948	3.75411e-06	0.00011976
Adssl1	13.2129	1.89316e-06	-0.420102	-0.327181	3.75411e-06	0.00011976
Carm1	13.2875	1.75765e-06	0.0849362	0.321955	3.75411e-06	0.00011976
Cct2	13.9579	9.02435e-07	0.397531	0.292824	3.75411e-06	0.00011976
Cd24a	12.9553	2.44602e-06	-0.290279	-0.261561	3.75411e-06	0.00011976
Cnn3	13.5667	1.33155e-06	0.0961696	0.313148	3.75411e-06	0.00011976
Cpa6	13.5687	1.32888e-06	0.0299787	0.326758	3.75411e-06	0.00011976
Cycs	13.9483	9.11116e-07	0.178819	0.299481	3.75411e-06	0.00011976
Cyp51	13.9163	9.40541e-07	0.26328	0.234364	3.75411e-06	0.00011976
Dph3	13.2606	1.80534e-06	0.0992705	0.308303	3.75411e-06	0.00011976
Eif3b	13.6467	1.22969e-06	0.161752	0.327712	3.75411e-06	0.00011976
Fam111a	12.8589	2.69206e-06	-0.0766641	-0.0658583	3.75411e-06	0.00011976
Glipr1	12.9298	2.5089e-06	0.348894	0.318198	3.75411e-06	0.00011976
Gspt1	13.4368	1.51514e-06	0.332476	0.321112	3.75411e-06	0.00011976
Hexb	13.4716	1.46371e-06	-0.102951	-0.23437	3.75411e-06	0.00011976
Hmgn2	13.4194	1.54165e-06	-0.165792	-0.270245	3.75411e-06	0.00011976
Hras	13.5929	1.29734e-06	0.132359	0.327944	3.75411e-06	0.00011976
Id2	12.8911	2.60739e-06	-0.204015	-0.3235	3.75411e-06	0.00011976
Megf9	13.7838	1.07305e-06	-0.134403	-0.289754	3.75411e-06	0.00011976
Minpp1	12.9479	2.46413e-06	0.168482	0.293983	3.75411e-06	0.00011976
Mrpl17	13.892	9.63558e-07	0.211907	0.338379	3.75411e-06	0.00011976
Pde2a	13.7057	1.15966e-06	-0.142854	-0.286559	3.75411e-06	0.00011976
Pin1rt1	13.7291	1.13299e-06	0.0138794	0.0792134	3.75411e-06	0.00011976
Prmt5	13.0618	2.20017e-06	0.145729	0.314987	3.75411e-06	0.00011976
Rab1a	12.8926	2.60347e-06	0.212331	0.219663	3.75411e-06	0.00011976
Rad23b	13.9778	8.8475e-07	0.158512	0.267506	3.75411e-06	0.00011976
Ranbp1	13.9685	8.92932e-07	0.261076	0.329628	3.75411e-06	0.00011976
Rhog	12.9631	2.42703e-06	-0.209496	-0.159601	3.75411e-06	0.00011976
Rps7	12.8588	2.69236e-06	-0.482617	-0.321989	3.75411e-06	0.00011976
Rrp15	13.8633	9.91486e-07	0.13383	0.330009	3.75411e-06	0.00011976
S100a6	13.6501	1.22562e-06	-0.606822	-0.331065	3.75411e-06	0.00011976
Shtn1	13.1253	2.06541e-06	0.043422	0.254171	3.75411e-06	0.00011976
Sod2	13.0308	2.26904e-06	0.182616	0.27893	3.75411e-06	0.00011976
Tcof1	13.1714	1.97286e-06	0.205302	0.299884	3.75411e-06	0.00011976
Tubb5	13.6346	1.24464e-06	0.83383	0.307522	3.75411e-06	0.00011976
Usp50	13.4099	1.55626e-06	0.260125	0.33303	3.75411e-06	0.00011976
Wdr43	13.506	1.41448e-06	0.177311	0.324955	3.75411e-06	0.00011976
Wipi1	13.9101	9.46365e-07	-0.0907778	-0.273431	3.75411e-06	0.00011976
Atp11a	12.501	3.84359e-06	0.101906	0.30951	5.63116e-06	0.000165289
Bcas2	12.5988	3.48714e-06	0.249428	0.257402	5.63116e-06	0.000165289
Cd37	12.3933	4.27834e-06	-0.194989	-0.290593	5.63116e-06	0.000165289
Ddx3x	12.5866	3.52985e-06	0.31671	0.32207	5.63116e-06	0.000165289
Dse	12.341	4.50673e-06	0.00874761	0.220634	5.63116e-06	0.000165289
Eef1g	12.3334	4.541e-06	0.351766	0.317822	5.63116e-06	0.000165289
Eif4a1	12.3753	4.35557e-06	0.390308	0.31956	5.63116e-06	0.000165289
Elk3	12.5177	3.78038e-06	0.162269	0.293565	5.63116e-06	0.000165289
Exoc6b	12.7005	3.15171e-06	0.0280603	0.25972	5.63116e-06	0.000165289
Fam101b	12.4669	3.97603e-06	-0.125715	-0.287554	5.63116e-06	0.000165289
Gemin6	12.4755	3.94225e-06	0.106542	0.318345	5.63116e-06	0.000165289
Gnl3	12.6791	3.21951e-06	0.0865494	0.238749	5.63116e-06	0.000165289
H2-K1	12.4378	4.09311e-06	-0.659313	-0.311638	5.63116e-06	0.000165289
Hnrnpc	12.3363	4.52792e-06	0.347767	0.192532	5.63116e-06	0.000165289
Hnrnpdl	12.4395	4.08586e-06	0.268565	0.268947	5.63116e-06	0.000165289
Ifi203	12.5576	3.633e-06	0.0766463	0.321763	5.63116e-06	0.000165289
Igf1r	12.339	4.51567e-06	-0.389095	-0.302682	5.63116e-06	0.000165289
Man1c1	12.8161	2.80923e-06	-0.179044	-0.284425	5.63116e-06	0.000165289
Mtap	12.7226	3.08324e-06	0.0892617	0.270765	5.63116e-06	0.000165289
Orc2	12.5526	3.65122e-06	0.136404	0.282149	5.63116e-06	0.000165289
Pi4k2a	12.5113	3.80437e-06	0.0643619	0.293947	5.63116e-06	0.000165289
Pin1	12.3658	4.39683e-06	0.244093	0.318821	5.63116e-06	0.000165289
Ptgs1	12.4319	4.11723e-06	-0.128571	-0.288335	5.63116e-06	0.000165289
Rassf4	12.7553	2.98441e-06	0.116974	0.322193	5.63116e-06	0.000165289
Rpl27a	12.7611	2.96731e-06	-1.18946	-0.306316	5.63116e-06	0.000165289
Rsu1	12.5013	3.84237e-06	-0.325255	-0.307196	5.63116e-06	0.000165289
Sms	12.8154	2.81126e-06	0.174463	0.322507	5.63116e-06	0.000165289
Snrpd3	12.426	4.14139e-06	0.238766	0.303919	5.63116e-06	0.000165289
Tpd52	12.7105	3.1203e-06	0.181554	0.281379	5.63116e-06	0.000165289
2810417H13Rik	12.0966	5.74773e-06	0.509867	0.316705	7.50821e-06	0.000208877
Arhgef10l	12.2587	4.89123e-06	0.065269	0.318256	7.50821e-06	0.000208877
Cct7	12.2373	4.99672e-06	0.237227	0.318584	7.50821e-06	0.000208877
Clec12a	12.2427	4.96971e-06	-0.308034	-0.295511	7.50821e-06	0.000208877
Clta	12.1702	5.34151e-06	0.312135	0.292875	7.50821e-06	0.000208877
Eef1d	12.1656	5.36614e-06	0.170723	0.316749	7.50821e-06	0.000208877
Fam107b	12.2722	4.82586e-06	-0.382454	-0.251242	7.50821e-06	0.000208877
Gm5616	12.2192	5.08763e-06	0.14902	0.283477	7.50821e-06	0.000208877
Gng10	12.0827	5.82782e-06	0.220182	0.26417	7.50821e-06	0.000208877
Lrg1	11.9793	6.45918e-06	-0.0750376	-0.196508	7.50821e-06	0.000208877
Lyar	12.1585	5.40423e-06	0.1817	0.242396	7.50821e-06	0.000208877
Mndal	12.3011	4.68919e-06	0.062849	0.318356	7.50821e-06	0.000208877
Noct	12.1433	5.48678e-06	-0.320973	-0.316092	7.50821e-06	0.000208877
Oxsr1	12.2696	4.83881e-06	0.127447	0.268577	7.50821e-06	0.000208877
Pdlim1	12.2502	4.93311e-06	-0.0960567	-0.286685	7.50821e-06	0.000208877
Psmb7	12.2103	5.13279e-06	0.172204	0.309139	7.50821e-06	0.000208877
Rcc2	12.2737	4.81888e-06	0.162723	0.245804	7.50821e-06	0.000208877
Rcl1	12.3159	4.62067e-06	0.172289	0.277376	7.50821e-06	0.000208877
Rpl31	12.268	4.84643e-06	-0.580036	-0.250035	7.50821e-06	0.000208877
Tctex1d1	12.2057	5.15622e-06	0.0301891	0.31811	7.50821e-06	0.000208877
Actb	11.7151	8.40196e-06	-1.3841	-0.303282	9.38527e-06	0.000252525
Crip1	11.7933	7.77224e-06	-0.0957629	-0.279854	9.38527e-06	0.000252525
Ctsl	11.8281	7.50812e-06	0.0880002	0.295382	9.38527e-06	0.000252525
Dtx3	11.7064	8.47453e-06	-0.104763	-0.302239	9.38527e-06	0.000252525
Golim4	11.867	7.22316e-06	-0.211681	-0.291412	9.38527e-06	0.000252525
Gsr	11.763	8.01057e-06	-0.946323	-0.308621	9.38527e-06	0.000252525
Mat2a	11.896	7.01728e-06	0.391933	0.30288	9.38527e-06	0.000252525
Mxi1	11.8871	7.07993e-06	-0.195446	-0.245748	9.38527e-06	0.000252525
Prdx6	11.8505	7.34242e-06	-0.418524	-0.312761	9.38527e-06	0.000252525
Slc25a4	11.8316	7.4815e-06	0.147941	0.256978	9.38527e-06	0.000252525
Tmem14c	11.6647	8.83396e-06	0.294922	0.252117	9.38527e-06	0.000252525
Tmem173	11.8799	7.13061e-06	0.0828332	0.260979	9.38527e-06	0.000252525
Ywhae	11.8051	7.68173e-06	0.404284	0.298772	9.38527e-06	0.000252525
Cox4i1	11.599	9.43086e-06	0.537873	0.301055	1.12623e-05	0.000302267
Dnaja2	11.5244	1.01572e-05	0.205208	0.270749	1.31394e-05	0.00035
Rpl10a	11.5671	9.73455e-06	-0.697043	-0.298419	1.31394e-05	0.00035
Slc25a1	11.5265	1.01363e-05	0.222694	0.306502	1.31394e-05	0.00035
Acpp	11.4698	1.07248e-05	-0.090673	-0.274963	1.50164e-05	0.000397022
Chchd4	11.4752	1.06672e-05	0.125484	0.296748	1.50164e-05	0.000397022
Fbp1	11.3831	1.16917e-05	-0.0744534	-0.258656	1.50164e-05	0.000397022
Glrx5	11.3258	1.23778e-05	0.154135	0.238025	1.68935e-05	0.000435835
H1f0	11.2713	1.30673e-05	-0.213002	-0.303015	1.68935e-05	0.000435835
Hmgcr	11.3735	1.1804e-05	0.159108	0.169908	1.68935e-05	0.000435835
Nxf1	11.2873	1.28616e-05	0.160125	0.289055	1.68935e-05	0.000435835
Pcyox1	11.2616	1.3194e-05	-0.187123	-0.297796	1.68935e-05	0.000435835
Plin2	11.3053	1.26322e-05	0.215166	0.238139	1.68935e-05	0.000435835
Prps1	11.2654	1.31451e-05	0.164748	0.300117	1.68935e-05	0.000435835
Psat1	11.2631	1.3175e-05	0.191583	0.252818	1.68935e-05	0.000435835
Rpl35a	11.3331	1.22884e-05	-0.710866	-0.261429	1.68935e-05	0.000435835
Trappc6a	11.2941	1.27746e-05	-0.128823	-0.293533	1.68935e-05	0.000435835
Prr11	11.2151	1.38198e-05	0.168468	0.298075	1.87705e-05	0.000483092
Ahsa1	11.0856	1.5721e-05	0.255936	0.281705	2.06476e-05	0.000516432
Cd34	11.0425	1.64107e-05	-0.00610467	-0.0139907	2.06476e-05	0.000516432
Exoc6	11.147	1.47892e-05	-0.14248	-0.277959	2.06476e-05	0.000516432
Fut8	11.0368	1.6504e-05	-0.138909	-0.272453	2.06476e-05	0.000516432
Ipo5	11.1579	1.46299e-05	0.1971	0.293113	2.06476e-05	0.000516432
Lpxn	11.112	1.53135e-05	0.0335283	0.26627	2.06476e-05	0.000516432
Ms4a3	11.1377	1.49269e-05	-0.302067	-0.143285	2.06476e-05	0.000516432
Phf5a	11.1382	1.49191e-05	0.240127	0.268894	2.06476e-05	0.000516432
Plekha3	11.0064	1.70112e-05	0.191804	0.277314	2.06476e-05	0.000516432
Pnkp	11.0784	1.58338e-05	-0.0932309	-0.268799	2.06476e-05	0.000516432
U2af2	11.1718	1.44276e-05	0.389549	0.30389	2.06476e-05	0.000516432
Wfdc21	11.162	1.45699e-05	-0.480013	-0.270416	2.06476e-05	0.000516432
Cnbp	10.975	1.75505e-05	0.213616	0.300843	2.25246e-05	0.000554273
Cox10	10.9744	1.75614e-05	0.0903075	0.288391	2.25246e-05	0.000554273
Ddx56	10.9879	1.73269e-05	0.0818175	0.299158	2.25246e-05	0.000554273
Igf2bp3	10.9948	1.72082e-05	0.0211022	0.13311	2.25246e-05	0.000554273
Nup35	10.9915	1.72639e-05	0.0553752	0.282683	2.25246e-05	0.000554273
Pfdn2	10.9704	1.76304e-05	0.190125	0.25197	2.25246e-05	0.000554273
Tmx4	10.9573	1.78628e-05	-0.301398	-0.294426	2.25246e-05	0.000554273
Gusb	10.9341	1.82795e-05	0.193866	0.293637	2.44017e-05	0.000597701
Prdx4	10.9153	1.86247e-05	0.0276249	0.300956	2.44017e-05	0.000597701
Dbi	10.8667	1.95487e-05	0.33711	0.2822	2.62787e-05	0.000640732
S100a1	10.8648	1.95863e-05	-0.205791	-0.285423	2.62787e-05	0.000640732
Ccdc125	10.8445	1.99855e-05	-0.152365	-0.23779	2.81558e-05	0.000684932
Aldoart1	10.8106	2.06727e-05	0.0134625	0.278268	3.00328e-05	0.000728929
Bcl11a	10.7194	2.2637e-05	-0.0655902	-0.202034	3.3787e-05	0.000801782
Elavl1	10.6753	2.36522e-05	0.190499	0.243652	3.3787e-05	0.000801782
Llph	10.6634	2.39341e-05	0.191617	0.235438	3.3787e-05	0.000801782
Nat10	10.6765	2.3624e-05	0.0494072	0.297476	3.3787e-05	0.000801782
Rps19	10.6753	2.36518e-05	-0.727754	-0.236355	3.3787e-05	0.000801782
Sla	10.7872	2.11582e-05	-0.136557	-0.207226	3.3787e-05	0.000801782
Srsf6	10.6525	2.41958e-05	0.256268	0.251481	3.3787e-05	0.000801782
Tspan2	10.7776	2.13626e-05	-0.100833	-0.280224	3.3787e-05	0.000801782
Vamp8	10.7589	2.17646e-05	-0.104894	-0.166235	3.3787e-05	0.000801782
Vcan	10.7057	2.2947e-05	0.030021	0.284346	3.3787e-05	0.000801782
Agpat9	10.5177	2.76706e-05	0.0034292	0.0565977	3.5664e-05	0.000837004
Ccl9	10.5699	2.62706e-05	0.249495	0.187125	3.5664e-05	0.000837004
Exosc2	10.502	2.81083e-05	0.263075	0.295101	3.5664e-05	0.000837004
Ppid	10.476	2.88449e-05	0.126527	0.138115	3.5664e-05	0.000837004
mt-Cytb	10.5387	2.70979e-05	-1.46478	-0.151133	3.5664e-05	0.000837004
Atp1b1	10.4218	3.04444e-05	-0.03918	-0.246546	3.75411e-05	0.000863931
Caprin1	10.3538	3.25767e-05	0.169816	0.207765	3.75411e-05	0.000863931
Dmc1	10.3657	3.21944e-05	-0.0364249	-0.270532	3.75411e-05	0.000863931
Gjb3	10.3809	3.17101e-05	0.0502265	0.112139	3.75411e-05	0.000863931
Nol11	10.3583	3.24306e-05	0.137279	0.288962	3.75411e-05	0.000863931
Nop2	10.3511	3.26655e-05	0.134581	0.292213	3.75411e-05	0.000863931
Thrsp	10.4181	3.05548e-05	-0.00999826	-0.14291	3.75411e-05	0.000863931
Tmem59	10.3854	3.15663e-05	-0.313084	-0.293331	3.75411e-05	0.000863931
Tmem97	10.3545	3.25523e-05	0.153561	0.245798	3.75411e-05	0.000863931
Ccl3	10.3324	3.32791e-05	0.0914304	0.269885	3.94181e-05	0.000899358
Morf4l2	10.3368	3.31325e-05	0.250539	0.253663	3.94181e-05	0.000899358
S100a4	10.3241	3.35549e-05	0.0585221	0.17576	3.94181e-05	0.000899358
Tmed7	10.3353	3.3182e-05	0.133282	0.205834	3.94181e-05	0.000899358
Ldlrad3	10.2676	3.54954e-05	0.107932	0.278626	4.12952e-05	0.000932203
Mtdh	10.2973	3.4462e-05	0.239784	0.237689	4.12952e-05	0.000932203
Slc41a3	10.3084	3.40828e-05	-0.0399462	-0.273811	4.12952e-05	0.000932203
Snrpf	10.2919	3.46482e-05	0.314095	0.204581	4.12952e-05	0.000932203
Timm13	10.3106	3.40087e-05	0.116608	0.278932	4.12952e-05	0.000932203
Prkcb	10.2608	3.57359e-05	-0.127645	-0.291246	4.31722e-05	0.000972516
Tomm70a	10.2484	3.61808e-05	0.22854	0.278527	4.69263e-05	0.00105485
Abce1	10.2092	3.76229e-05	0.174626	0.191668	5.06804e-05	0.00113208
Nme2	10.2037	3.783e-05	0.385154	0.291008	5.06804e-05	0.00113208
Scd1	10.2155	3.73864e-05	0.0468472	0.089743	5.06804e-05	0.00113208
Csgalnact2	10.1384	4.0372e-05	-0.210137	-0.258826	5.25575e-05	0.0011691
Isoc1	10.1618	3.94393e-05	0.0591007	0.202479	5.25575e-05	0.0011691
Serf2	10.1257	4.08859e-05	-0.447683	-0.239868	5.44345e-05	0.00120833
Dhcr24	10.0932	4.22306e-05	0.171815	0.266471	6.00657e-05	0.00133056
AI839979	10.0494	4.41102e-05	0.0980306	0.286423	6.56969e-05	0.00140562
Cyba	9.90878	5.07429e-05	-0.274742	-0.285187	6.56969e-05	0.00140562
Cyc1	10.0569	4.37835e-05	0.255574	0.268332	6.56969e-05	0.00140562
Ddi2	10.0379	4.46186e-05	0.188936	0.282886	6.56969e-05	0.00140562
Fah	9.98934	4.68309e-05	-0.0679519	-0.258888	6.56969e-05	0.00140562
Medag	9.97688	4.74156e-05	0.0204556	0.275728	6.56969e-05	0.00140562
Mmp8	10.0344	4.47751e-05	0.131415	0.243885	6.56969e-05	0.00140562
Neil3	9.90028	5.11746e-05	-0.13532	-0.260532	6.56969e-05	0.00140562
Prom1	10.0183	4.55001e-05	-0.106819	-0.204887	6.56969e-05	0.00140562
Rhoj	10.0404	4.45112e-05	-0.154088	-0.288148	6.56969e-05	0.00140562
Rnaset2b	10.0007	4.6303e-05	-0.216305	-0.250595	6.56969e-05	0.00140562
Rpl18a	10.0098	4.58852e-05	-0.943228	-0.233394	6.56969e-05	0.00140562
Sh3glb1	9.98445	4.70597e-05	0.112991	0.222954	6.56969e-05	0.00140562
St13	9.98806	4.68907e-05	0.229074	0.263995	6.56969e-05	0.00140562
Tmem176b	9.93741	4.93168e-05	0.150302	0.273875	6.56969e-05	0.00140562
Ywhaz	10.031	4.49281e-05	0.31193	0.266698	6.56969e-05	0.00140562
Zfp251	9.91268	5.05464e-05	0.0271517	0.230742	6.56969e-05	0.00140562
Coro1c	9.89301	5.15463e-05	0.0703914	0.127259	6.75739e-05	0.00144
Hsp90b1	9.86662	5.29189e-05	0.494501	0.257093	6.75739e-05	0.00144
Aldoa	9.81208	5.58732e-05	-0.622472	-0.285275	6.9451e-05	0.00145669
Gm37214	9.78707	5.72824e-05	0.2162	0.26704	6.9451e-05	0.00145669
Mcee	9.8265	5.50768e-05	-0.151283	-0.264706	6.9451e-05	0.00145669
Nutf2	9.77306	5.80874e-05	0.0856426	0.190885	6.9451e-05	0.00145669
Pml	9.80576	5.62259e-05	-0.159065	-0.272323	6.9451e-05	0.00145669
Pno1	9.77319	5.80797e-05	0.125466	0.228078	6.9451e-05	0.00145669
Rhoq	9.80962	5.60105e-05	0.185064	0.283562	6.9451e-05	0.00145669
Sat1	9.82631	5.50871e-05	-0.370206	-0.282574	6.9451e-05	0.00145669
C3	9.6975	6.26279e-05	-0.139732	-0.277963	7.50821e-05	0.00156556
Ccdc62	9.74812	5.95485e-05	0.44277	0.283123	7.50821e-05	0.00156556
Timm17a	9.69781	6.26084e-05	0.181371	0.279487	7.50821e-05	0.00156556
Brix1	9.65881	6.50888e-05	0.0838789	0.264156	7.69592e-05	0.00160156
Cse1l	9.64783	6.58043e-05	0.21755	0.230604	7.88362e-05	0.00163743
Gpsm3	9.6305	6.69503e-05	-0.0623542	-0.209322	8.07133e-05	0.00167315
Ccng2	9.6268	6.71976e-05	-0.146734	-0.282603	8.25903e-05	0.00170543
Wdr31	9.61542	6.79636e-05	-0.135634	-0.242689	8.25903e-05	0.00170543
Picalm	9.59688	6.92299e-05	0.116702	0.27457	8.44674e-05	0.00174081
4930519L02Rik	9.5649	7.14708e-05	-0.0726204	-0.198383	9.00985e-05	0.00184971
Erp29	9.56221	7.16623e-05	0.141943	0.141032	9.00985e-05	0.00184971
Abcb10	9.50073	7.61883e-05	-0.0467785	-0.122436	9.57297e-05	0.00195029
Idh2	9.48658	7.72699e-05	0.201263	0.249406	9.57297e-05	0.00195029
Lamtor5	9.48867	7.71095e-05	0.162506	0.197076	9.57297e-05	0.00195029
Micu1	9.49961	7.62735e-05	-0.106193	-0.205726	9.57297e-05	0.00195029
Ncam1	9.47599	7.80894e-05	-0.0510715	-0.241531	9.76068e-05	0.00198473
Gm9774	9.45686	7.95917e-05	0.0731697	0.277367	9.94838e-05	0.00201905
Snrpb	9.43708	8.11754e-05	0.193137	0.278748	0.000103238	0.00208729
Zfas1	9.41928	8.26282e-05	0.212805	0.276504	0.000103238	0.00208729
Ftl1	9.40481	8.38279e-05	0.219757	0.275674	0.000105115	0.00212121
Rasl2-9	9.39123	8.49689e-05	0.0677475	0.243707	0.000108869	0.00219282
Psme3	9.38185	8.5767e-05	0.335169	0.277784	0.000110746	0.00222642
2500004C02Rik	9.34925	8.85976e-05	0.158696	0.277161	0.000118254	0.00237288
F7	9.30912	9.22112e-05	0.0945013	0.155005	0.000125763	0.00251407
Itga1	9.30276	9.2798e-05	0.0386068	0.268551	0.000125763	0.00251407
Arl6ip5	9.23503	9.92752e-05	0.0477205	0.239054	0.00012764	0.00254206
Nucks1	9.25342	9.74728e-05	0.228831	0.236989	0.00012764	0.00254206
Atic	9.18602	0.000104242	0.125919	0.272471	0.000137025	0.00270872
Prpf8	9.16919	0.000106005	0.24667	0.270745	0.000137025	0.00270872
Smyd5	9.17799	0.00010508	0.0558857	0.266895	0.000137025	0.00270872
mt-Nd3	9.16804	0.000106126	0.356287	0.16807	0.000137025	0.00270872
Dhx15	9.16598	0.000106345	0.321923	0.272041	0.000138902	0.00274074
Ets1	9.13739	0.000109417	-0.074328	-0.264569	0.000144533	0.00284133
Gm17087	9.1326	0.00010994	0.0116855	0.268716	0.000144533	0.00284133
Sema4a	9.12744	0.000110507	-0.131104	-0.16297	0.00014641	0.00287293
Ube2cbp	9.09668	0.000113947	0.0158019	0.274818	0.000150164	0.00294118
Sp110	9.06709	0.000117356	-0.14059	-0.245921	0.000157672	0.00308257
Gm13546	9.03581	0.000121071	-0.0747758	-0.244707	0.000167058	0.00326007
Klf2	9.01866	0.000123157	0.0737624	0.213582	0.000172689	0.00335155
Serpina3f	9.01436	0.000123686	0.0281077	0.252368	0.000172689	0.00335155
Tmem214	9.01049	0.000124163	0.0828422	0.269894	0.000172689	0.00335155
Lrrc58	8.99447	0.000126162	0.0917157	0.114239	0.000176443	0.00339964
Pdcd6ip	8.99676	0.000125874	0.20703	0.237439	0.000176443	0.00339964
Prrg2	8.98615	0.000127212	-0.0983344	-0.254717	0.000176443	0.00339964
Rsl1d1	8.99111	0.000126584	0.1276	0.228046	0.000176443	0.00339964
Arl11	8.95597	0.000131095	-0.201166	-0.256385	0.000182074	0.00347048
Eif3j2	8.96699	0.000129663	0.0838568	0.243141	0.000182074	0.00347048
Gja1	8.9458	0.000132429	0.0467461	0.260677	0.000182074	0.00347048
Pik3c2a	8.9469	0.000132284	0.0271461	0.0819479	0.000182074	0.00347048
Thy1	8.93294	0.000134138	-0.197729	-0.202278	0.000182074	0.00347048
Tomm40	8.96395	0.000130056	0.147865	0.26404	0.000182074	0.00347048
Fbl	8.92535	0.000135156	0.0794621	0.118779	0.000187705	0.00355872
Mta1	8.9205	0.00013581	0.104305	0.203333	0.000187705	0.00355872
Naa25	8.92076	0.000135776	0.0740571	0.249712	0.000187705	0.00355872
Dpy30	8.90151	0.000138405	0.173251	0.20723	0.000189582	0.00358156
Gltp	8.90589	0.000137802	-0.103631	-0.163633	0.000189582	0.00358156
Cenpv	8.88001	0.000141401	0.0644268	0.171224	0.000191459	0.00361062
Mboat2	8.87311	0.000142377	-0.0461419	-0.235981	0.000193336	0.00363316
Ufm1	8.86895	0.000142968	0.132333	0.189894	0.000193336	0.00363316
Rhot1	8.86501	0.00014353	0.129201	0.249495	0.000195214	0.00366197
Anxa3	8.85212	0.000145386	-0.335291	-0.2698	0.000198968	0.00372174
Cd164	8.82084	0.000149989	0.14902	0.239031	0.000200845	0.00372174
Cyb5b	8.82261	0.000149724	0.174814	0.226189	0.000200845	0.00372174
Exoc3l4	8.83324	0.000148147	0.0119725	0.212818	0.000200845	0.00372174
Fosl2	8.83571	0.000147783	0.042026	0.229392	0.000200845	0.00372174
Rpl28	8.82309	0.000149653	-0.469074	-0.208761	0.000200845	0.00372174
Tfec	8.82444	0.000149452	0.220354	0.267144	0.000200845	0.00372174
Aldh3b1	8.8125	0.00015124	-0.0893268	-0.21609	0.000202722	0.0037435
Mrps7	8.80829	0.000151877	0.0870732	0.248162	0.000202722	0.0037435
Rpl7	8.79027	0.000154628	-0.327145	-0.105097	0.000204599	0.00377163
Atp1b3	8.77015	0.000157758	0.20908	0.233785	0.000206476	0.0037931
Pnpla7	8.77955	0.000156288	-0.0945448	-0.229195	0.000206476	0.0037931
Gpr65	8.72702	0.000164687	0.00388784	0.0117886	0.00021023	0.0038422
Rap1b	8.72809	0.000164511	0.136899	0.143697	0.00021023	0.0038422
Slc9a3r2	8.73403	0.000163541	-0.0555466	-0.204651	0.00021023	0.0038422
Chn2	8.67838	0.000172865	0.0796632	0.255654	0.000221492	0.00400679
Dynlt3	8.66365	0.000175421	-0.143681	-0.267839	0.000221492	0.00400679
Hn1	8.68458	0.000171801	0.176494	0.259071	0.000219615	0.00400679
Krr1	8.6665	0.000174924	0.0931501	0.220733	0.000221492	0.00400679
Mirt1	8.66739	0.000174769	-0.0654057	-0.25875	0.000221492	0.00400679
Tdrd3	8.67822	0.000172893	0.0236995	0.18812	0.000221492	0.00400679
Cebpd	8.64551	0.00017862	-0.0873954	-0.0873551	0.000225246	0.0040678
Mrps18b	8.63359	0.000180755	0.128051	0.262308	0.000227123	0.00407407
Plod3	8.6368	0.000180177	0.180896	0.265597	0.000227123	0.00407407
Ube2k	8.63357	0.000180758	0.190727	0.267618	0.000227123	0.00407407
Vmp1	8.61954	0.000183303	0.0360572	0.0764643	0.000227123	0.00407407
2810403D21Rik	8.61405	0.000184308	0.182297	0.249721	0.000229	0.00410084
Gm16286	8.60728	0.000185557	0.193262	0.267384	0.000230878	0.00410684
Hnrnpa0	8.59481	0.000187877	0.182456	0.123722	0.000230878	0.00410684
Mrps2	8.58306	0.000190089	0.0869192	0.266208	0.000230878	0.00410684
Nol9	8.60763	0.000185492	0.0792984	0.267389	0.000230878	0.00410684
Mospd3	8.54399	0.000197636	-0.139178	-0.171537	0.000244017	0.00433333
Acyp1	8.53592	0.000199232	-0.117701	-0.256705	0.000245894	0.0043594
Lin28a	8.52669	0.000201074	-0.0481325	-0.246387	0.000249648	0.0044186
Nek2	8.50306	0.000205863	0.065964	0.212347	0.000251525	0.00443709
Plekhm2	8.51153	0.000204134	-0.0156047	-0.0621895	0.000251525	0.00443709
Dnajc10	8.48326	0.000209966	0.13517	0.202952	0.000253402	0.00446281
Nudc	8.48218	0.000210192	0.119516	0.265407	0.000255279	0.00448845
Slirp	8.47323	0.000212077	0.188563	0.226258	0.00026091	0.0045799
Hnrnpa1	8.42892	0.00022165	0.216449	0.232496	0.000277804	0.00486043
Zfp141	8.43088	0.000221218	-0.0759046	-0.244327	0.000277804	0.00486043
Magt1	8.41322	0.000225146	0.158026	0.194081	0.000279681	0.00487725
Selt	8.41367	0.000225045	0.239585	0.250261	0.000279681	0.00487725
Nfkbid	8.39086	0.000230219	-0.0193306	-0.0845629	0.000283435	0.00493464
Aoah	8.37283	0.000234394	-0.0646327	-0.193485	0.000287189	0.00496753
Cd48	8.38597	0.000231343	0.0256474	0.0612703	0.000287189	0.00496753
Ehd4	8.37372	0.000234186	0.118979	0.25123	0.000287189	0.00496753
Nr2c2	8.38735	0.000231025	-0.100866	-0.220646	0.000287189	0.00496753
Alox5ap	8.36672	0.000235825	-0.271955	-0.23005	0.000289066	0.0049919
Psmd14	8.34851	0.000240142	0.219862	0.212982	0.000294697	0.00508091
Hdlbp	8.34608	0.000240726	0.1712	0.253971	0.000296574	0.00508857
Ppm1g	8.34237	0.000241618	0.203464	0.247667	0.000296574	0.00508857
Srsf1	8.34054	0.000242059	0.218922	0.185711	0.000296574	0.00508857
Bysl	8.32172	0.000246642	0.0750091	0.261901	0.000300328	0.00511182
Ercc8	8.3236	0.000246178	0.0474023	0.256672	0.000300328	0.00511182
Got1	8.33095	0.000244384	0.123453	0.259463	0.000300328	0.00511182
Hacd2	8.33368	0.000243719	-0.11788	-0.222853	0.000300328	0.00511182
Sgpp1	8.3281	0.000245078	-0.156306	-0.203957	0.000300328	0.00511182
Dctn1	8.30928	0.000249717	-0.127435	-0.171672	0.00030596	0.00519108
Slc7a5	8.2964	0.000252945	0.130368	0.234722	0.00030596	0.00519108
Ptpn2	8.28643	0.000255471	-0.171224	-0.261633	0.000309714	0.00524642
Cerk	8.26718	0.000260418	-0.153557	-0.260552	0.000311591	0.00526149
Uhrf1bp1l	8.26815	0.000260168	0.136206	0.170322	0.000311591	0.00526149
Armc9	8.25026	0.000264847	0.0136356	0.260134	0.000320976	0.00541139
Rps14	8.23453	0.000269033	-0.468055	-0.1993	0.000322853	0.00542587
Tkt	8.24088	0.000267335	-0.212889	-0.209064	0.000322853	0.00542587
Fry	8.23212	0.000269679	0.121704	0.221271	0.00032473	0.00544025
Gm36186	8.22247	0.000272285	0.0138918	0.171155	0.00032473	0.00544025
Npepps	8.21664	0.000273872	0.0711551	0.0869717	0.000326607	0.00546311
Fubp1	8.20573	0.000276867	0.172924	0.252371	0.000330361	0.00551724
Nucb1	8.19689	0.000279315	-0.220661	-0.229012	0.000332238	0.00553991
Vim	8.18705	0.00028207	0.225368	0.138525	0.000334115	0.0055625
Mthfd1l	8.16872	0.000287269	0.0791074	0.126081	0.00033787	0.00561622
AI987944	8.1634	0.000288796	-0.0789474	-0.168305	0.000339747	0.00563863
Eif4g1	8.16005	0.000289763	0.189151	0.259698	0.000343501	0.00568323
Pirb	8.15975	0.000289849	0.0333488	0.229336	0.000343501	0.00568323
Galnt7	8.14208	0.000294999	0.0622552	0.200461	0.000345378	0.00569659
Pyhin1	8.14337	0.000294621	0.0177238	0.254652	0.000345378	0.00569659
S1pr4	8.13188	0.000298014	-0.0804784	-0.250235	0.000347255	0.0057187
Cluh	8.10638	0.000305685	0.1029	0.249867	0.000354763	0.00583333
Smim20	8.08419	0.000312522	-0.0799939	-0.225791	0.000366025	0.00600924
Pafah2	8.06046	0.00032	-0.109291	-0.253252	0.000377288	0.00618462
Necap2	8.05044	0.000323212	0.0934108	0.245038	0.000384796	0.006298
Arpc5l	8.02325	0.000332091	0.120372	0.229592	0.000390427	0.00632219
Atf6b	8.03566	0.000328009	0.0904756	0.257902	0.000390427	0.00632219
Ccna2	8.01778	0.000333907	0.116046	0.179141	0.000390427	0.00632219
Ccr2	8.02829	0.000330428	0.0448894	0.249863	0.000390427	0.00632219
Cyth1	8.03344	0.000328734	0.00296127	0.00875029	0.000390427	0.00632219
Dnajc11	8.01807	0.000333811	0.0901657	0.256354	0.000390427	0.00632219
Ssr3	8.02918	0.000330134	0.133069	0.136245	0.000390427	0.00632219
Ap3s1	7.94751	0.000358132	0.710527	0.225115	0.00042046	0.00678788
Rasgrp3	7.95238	0.000356397	0.0107973	0.176911	0.00042046	0.00678788
Oxr1	7.92617	0.000365832	0.0306403	0.0597847	0.000427968	0.00688822
Zbed3	7.92695	0.000365548	0.0467263	0.23498	0.000427968	0.00688822
G3bp2	7.91842	0.000368669	0.147178	0.236555	0.000429845	0.00690799
Anxa1	7.91117	0.000371341	0.1218	0.136644	0.000437353	0.00700752
Tmed2	7.91159	0.000371189	0.178477	0.142937	0.000437353	0.00700752
Cct4	7.89185	0.000378562	0.204501	0.245816	0.000442985	0.00705531
D1Ertd622e	7.89663	0.000376763	0.0861138	0.252504	0.000442985	0.00705531
Ifngr1	7.88713	0.00038035	-0.328023	-0.237482	0.000442985	0.00705531
Pnpla8	7.89326	0.000378033	-0.0753764	-0.229686	0.000442985	0.00705531
Slc25a5	7.86277	0.000389699	0.330191	0.252317	0.000459878	0.00731343
Ppt1	7.85223	0.000393812	-0.160792	-0.245416	0.000463632	0.00736215
Arap3	7.81701	0.000407885	-0.0749415	-0.228028	0.000474894	0.00752976
Emilin2	7.79188	0.000418229	0.0633586	0.0587959	0.000478649	0.00753323
F730016J06Rik	7.78682	0.000420344	-0.0175679	-0.181425	0.000478649	0.00753323
Reep6	7.80909	0.000411118	-0.0651491	-0.237698	0.000476771	0.00753323
Sec24b	7.79669	0.000416229	0.0544177	0.253158	0.000478649	0.00753323
St3gal5	7.79093	0.000418628	-0.0213112	-0.132585	0.000478649	0.00753323
Hspbp1	7.77019	0.000427371	0.0893057	0.214874	0.000486157	0.00758419
Il1r2	7.77374	0.000425861	0.0166636	0.0367223	0.000486157	0.00758419
Mir142hg	7.75386	0.000434387	-0.0442764	-0.176124	0.000486157	0.00758419
Nip7	7.75875	0.000432273	0.141033	0.241335	0.000486157	0.00758419
Park7	7.77523	0.000425228	0.197418	0.238327	0.00048428	0.00758419
Ube2s	7.76737	0.000428575	0.174827	0.231195	0.000486157	0.00758419
Ndufab1	7.73779	0.000441399	0.041004	0.0613183	0.000489911	0.00762044
Pkib	7.74462	0.000438404	0.0516391	0.230942	0.000489911	0.00762044
Lcp1	7.7182	0.000450104	-0.393014	-0.170128	0.000495542	0.00768559
Rpl11	7.71809	0.000450154	-0.184859	-0.190997	0.000495542	0.00768559
Enpp5	7.71456	0.000451743	-0.0303032	-0.178359	0.000497419	0.00770349
Nudcd2	7.70601	0.000455606	0.120182	0.134044	0.00050305	0.00777939
Bclaf1	7.68472	0.00046538	0.14973	0.231385	0.00051619	0.00797101
Matn2	7.67595	0.000469464	0.0147156	0.250828	0.000521821	0.00804631
Bloc1s1	7.66387	0.000475153	-0.141678	-0.235758	0.000531206	0.00817919
Uqcr11	7.66053	0.000476738	0.154461	0.25216	0.000533083	0.00819625
Psmc4	7.64896	0.000482268	0.131542	0.251123	0.000538714	0.00825899
Rars	7.64959	0.000481969	0.0971035	0.172892	0.000538714	0.00825899
Glb1	7.64437	0.000484479	-0.0889955	-0.25073	0.000540591	0.00827586
Bag1	7.63962	0.000486782	0.278811	0.249393	0.000549977	0.00835949
F630028O10Rik	7.63244	0.000490277	-0.256657	-0.225246	0.000549977	0.00835949
Gar1	7.64039	0.000486408	0.205427	0.237649	0.000549977	0.00835949
Pkm	7.63281	0.000490096	-0.343264	-0.100837	0.000549977	0.00835949
Ptpn1	7.63959	0.000486795	-0.138605	-0.149159	0.000549977	0.00835949
Shfm1	7.63001	0.000491465	-0.279362	-0.237982	0.000553731	0.00840456
Eif2s2	7.61715	0.000497805	0.279966	0.205211	0.000561239	0.00849432
Sssca1	7.62241	0.000495205	0.0498637	0.249254	0.000561239	0.00849432
Mbd3	7.59425	0.0005093	0.151712	0.239327	0.000572501	0.00865248
Cmpk1	7.56637	0.000523655	0.138382	0.21099	0.00059878	0.00902405
Neu1	7.55862	0.000527717	-0.116903	-0.167433	0.00059878	0.00902405
Slc16a10	7.55561	0.000529305	0.0476984	0.213955	0.000600657	0.0090268
Snrpa1	7.54366	0.000535649	0.0946035	0.248677	0.000600657	0.0090268
Akr1b3	7.53474	0.000540431	0.164644	0.248677	0.000608165	0.00908836
Atad3a	7.53957	0.000537837	0.0806938	0.243917	0.000608165	0.00908836
Ptpre	7.53942	0.000537915	-0.113071	-0.201482	0.000608165	0.00908836
Rbpms2	7.53642	0.000539529	0.0171305	0.166651	0.000608165	0.00908836
Cdk2ap1	7.52832	0.0005439	0.111975	0.247029	0.000613796	0.00915966
Mrpl9	7.50052	0.000559188	0.0909383	0.224307	0.000628813	0.00937063
Mrpl3	7.49042	0.000564847	0.134237	0.220861	0.00063069	0.00937238
Psmd11	7.49654	0.00056141	0.154776	0.228316	0.00063069	0.00937238
Actn1	7.47706	0.000572418	-0.208595	-0.244104	0.000640075	0.00949861
Phb	7.45717	0.000583885	0.0496753	0.228719	0.000645706	0.00955556
Psmd7	7.45744	0.000583728	0.147351	0.207083	0.000645706	0.00955556
Nagpa	7.44291	0.000592241	0.183885	0.246848	0.000651337	0.00959889
Pdpr	7.44102	0.000593361	-0.00347669	-0.0461909	0.000651337	0.00959889
Rab33b	7.43618	0.000596228	0.187446	0.237248	0.000651337	0.00959889
Acadsb	7.42557	0.000602573	-0.163277	-0.247913	0.000660723	0.00972376
Rbfox2	7.40549	0.000614758	0.0235892	0.241114	0.000675739	0.00993103
Prep	7.39614	0.000620515	0.0528379	0.166035	0.000677616	0.0099449
Ipo7	7.38597	0.000626838	0.116517	0.220737	0.000690756	0.0101099
Naa30	7.38612	0.00062674	0.00644352	0.0198751	0.000690756	0.0101099
Fam126a	7.36706	0.000638764	0.0604182	0.155142	0.00069451	0.0101509
Tapbp	7.34937	0.000650132	-0.309752	-0.243468	0.000718911	0.0104932
Zswim4	7.34609	0.000652261	-0.0480389	-0.151249	0.000724542	0.0105609
Mesdc2	7.34052	0.000655893	0.0888116	0.148503	0.00072642	0.0105738
Smim6	7.33246	0.000661187	-0.0279725	-0.246603	0.000728297	0.0105866
Ssh2	7.32696	0.000664823	-0.118546	-0.217613	0.000741436	0.0107629
1700020I14Rik	7.28543	0.000692925	-0.130597	-0.223655	0.000775223	0.0112381
Clec4b2	7.27134	0.00070273	-0.0307232	-0.237403	0.000782731	0.0113008
Pecam1	7.26833	0.000704842	-0.117406	-0.183705	0.000782731	0.0113008
Ptprr	7.26967	0.000703904	0.0276045	0.245227	0.000782731	0.0113008
Rapgef1	7.25717	0.000712729	0.134418	0.245535	0.000792116	0.0114208
mt-Co2	7.24121	0.000724163	-2.96383	-0.156594	0.000801502	0.0115405
Lactb	7.21739	0.000741564	0.0839491	0.225129	0.000818395	0.0117679
Selk	7.215	0.000743336	-0.295034	-0.230302	0.000820272	0.011779
BC051077	7.20766	0.000748796	0.187593	0.241545	0.00082778	0.0118708
Mrpl18	7.16767	0.000779255	0.212048	0.215407	0.000857813	0.0122849
Arhgap39	7.16531	0.000781089	0.0318842	0.232067	0.000863444	0.012349
Spcs2	7.1517	0.000791765	0.360289	0.115598	0.000876584	0.0125201
Ddx58	7.14954	0.000793465	-0.11905	-0.218935	0.000880338	0.0125401
Uqcc2	7.14854	0.000794262	0.0598156	0.241694	0.000880338	0.0125401
Pus7	7.14488	0.000797162	0.0735072	0.223178	0.000882215	0.0125501
Mak16	7.13956	0.000801402	0.0964535	0.235334	0.000887846	0.0125965
Prim2	7.13489	0.000805145	-0.0828329	-0.235293	0.000887846	0.0125965
Knop1	7.12971	0.000809315	0.0852862	0.243375	0.000893477	0.0126428
Rnf149	7.12736	0.000811216	0.0729016	0.169983	0.000893477	0.0126428
March5	7.12328	0.000814519	0.0330362	0.0757848	0.000899108	0.0127056
Btla	7.1225	0.000815153	0.01598	0.191881	0.000900985	0.0127152
Smarcc2	7.10778	0.000827204	-0.0846607	-0.130564	0.000917879	0.0129365
Mgat1	7.10515	0.000829376	-0.124749	-0.242595	0.000919756	0.0129458
Gm17541	7.10094	0.000832866	-0.199345	-0.124155	0.00092351	0.0129644
Ssbp1	7.10067	0.000833093	0.172171	0.242492	0.00092351	0.0129644
Ahctf1	7.09816	0.00083518	0.112883	0.23532	0.000925387	0.0129737
Atp6ap2	7.09575	0.00083719	-0.272075	-0.172824	0.000929141	0.0129921
Cpd	7.09524	0.000837609	-0.116695	-0.238927	0.000929141	0.0129921
Fam69b	7.08351	0.000847468	-0.106915	-0.18929	0.000936649	0.0130628
Kcnj2	7.08533	0.000845934	0.0627151	0.228673	0.000936649	0.0130628
Hars	7.07545	0.000854306	0.138278	0.240756	0.000946035	0.0131765
Cotl1	7.0683	0.000860417	-0.137982	-0.236065	0.00095542	0.0132725
Rsrp1	7.07448	0.000855129	-0.225794	-0.193671	0.00095542	0.0132725
Tor3a	7.06527	0.000863022	0.0532992	0.23079	0.000959174	0.0133073
Lmtk2	7.04716	0.000878747	0.0408596	0.23504	0.000977945	0.0135149
Mbd4	7.05298	0.000873665	-0.0610015	-0.180045	0.000976068	0.0135149
Polr3g	7.04999	0.000876268	0.0419077	0.194155	0.000977945	0.0135149
Gcsh	7.02157	0.000901456	0.0544006	0.206326	0.00100235	0.0138163
Tifa	7.02148	0.000901536	0.067364	0.205106	0.00100235	0.0138163
Slc19a1	7.00809	0.000913654	0.0749593	0.228668	0.00101173	0.0138918
Taldo1	7.00818	0.000913576	-0.192758	-0.21654	0.00101173	0.0138918
Trps1	7.00844	0.000913339	0.0399182	0.201441	0.00101173	0.0138918
AY074887	6.99363	0.000926925	0.0171782	0.233677	0.00102299	0.0139386
Azin1	6.98715	0.000932931	0.126484	0.201256	0.00102299	0.0139386
Galns	6.99741	0.000923436	-0.051823	-0.125145	0.00102299	0.0139386
Glt1d1	6.99693	0.000923879	-0.0530095	-0.214738	0.00102299	0.0139386
Luc7l	6.99034	0.000929973	0.15432	0.235465	0.00102299	0.0139386
Syde2	6.986	0.000934003	0.0477251	0.218013	0.00102299	0.0139386
Egln3	6.98239	0.000937373	-0.168556	-0.228451	0.00102863	0.0139974
Luc7l3	6.97058	0.000948474	0.156388	0.239349	0.00103989	0.0141327
Ssr2	6.95568	0.000962671	0.156743	0.236889	0.00104927	0.014242
Otud6b	6.94793	0.000970142	0.0550232	0.148501	0.00105866	0.0143511
Fcgr1	6.93531	0.000982433	-0.00252823	-0.0111067	0.00106992	0.0144854
Sap30	6.90904	0.0010085	0.0796326	0.18857	0.00110371	0.0149239
Hspa4	6.9019	0.00101571	0.134381	0.238895	0.00111122	0.0150063
Ctss	6.89487	0.00102286	0.0234013	0.204744	0.00111685	0.0150633
Trpm7	6.87693	0.00104132	0.040094	0.071135	0.00113186	0.0152465
Pnrc1	6.87256	0.00104586	-0.151857	-0.236865	0.00113749	0.015303
Psmc2	6.86704	0.00105164	0.156228	0.232151	0.00114313	0.0153594
Rgs2	6.86496	0.00105382	-0.045965	-0.130034	0.001145	0.0153652
Cd55	6.85183	0.00106771	-0.0450036	-0.194285	0.00116565	0.0155834
Jagn1	6.85098	0.00106862	0.0648424	0.207252	0.00116565	0.0155834
Nop58	6.85001	0.00106966	0.152753	0.236745	0.00116565	0.0155834
Slc29a2	6.84741	0.00107243	0.0272539	0.233142	0.0011694	0.015614
Sacm1l	6.84424	0.00107583	0.0967999	0.19735	0.00117504	0.0156696
Ggnbp2	6.84029	0.00108007	-0.107596	-0.146457	0.00117691	0.015675
Siglece	6.83873	0.00108175	0.00807135	0.100761	0.00118067	0.0157054
Arsb	6.83314	0.0010878	-0.0968669	-0.197819	0.00119005	0.0158105
Ppil2	6.83041	0.00109077	-0.0293858	-0.0855662	0.00119381	0.0158406
Erg	6.82586	0.00109573	-0.102719	-0.237391	0.00119944	0.0158758
Snrnp70	6.82426	0.00109747	0.121541	0.103072	0.00119944	0.0158758
Cd9	6.80778	0.00111565	-0.0921001	-0.147558	0.00121445	0.0160546
Clptm1	6.80239	0.00112167	0.137096	0.233549	0.00121821	0.0160644
Itga6	6.80214	0.00112195	0.108636	0.188433	0.00121821	0.0160644
Hdac2	6.79785	0.00112676	0.118091	0.205861	0.00122384	0.0161187
Ptbp1	6.79224	0.00113308	0.217416	0.231417	0.00123135	0.0161776
Tnfaip1	6.79267	0.0011326	0.0372582	0.174086	0.00123135	0.0161776
Slc29a1	6.78956	0.00113612	0.00321365	0.00557732	0.00123698	0.0162315
Twf1	6.78217	0.00114452	0.080586	0.235939	0.00125012	0.0163838
U2surp	6.77457	0.00115323	0.161602	0.234051	0.00125763	0.0164619
Xist	6.76787	0.00116096	-0.354819	-0.226178	0.00127076	0.0166135
Bcap29	6.7654	0.00116382	0.0996206	0.19666	0.00127452	0.0166422
Samd10	6.75615	0.00117461	-0.0799318	-0.226702	0.00128766	0.0167931
Nipsnap1	6.75099	0.00118066	0.0330632	0.180971	0.00129892	0.0169193
Sgk3	6.74942	0.00118251	0.075799	0.174052	0.00130267	0.0169475
Sept6	6.74182	0.00119151	0.0130104	0.0290427	0.00131581	0.0170976
Eif2s1	6.73975	0.00119397	0.183079	0.225602	0.00131957	0.0171255
Hnrnph2	6.73026	0.00120532	0.0235718	0.0472907	0.00133834	0.0173479
Hyal2	6.72627	0.00121014	0.0260063	0.213251	0.00134772	0.0174484
Zcwpw1	6.72062	0.00121697	-0.00736698	-0.130953	0.0013496	0.0174515
Sf3b4	6.71981	0.00121796	0.220475	0.23332	0.00135336	0.0174788
Xylt1	6.7174	0.00122088	-0.0465906	-0.144902	0.00135711	0.0175061
Smarcd1	6.71481	0.00122404	-0.0105712	-0.0382016	0.00135899	0.0175091
Ptk2b	6.71286	0.00122642	-0.165576	-0.232456	0.00136086	0.0175121
Pigp	6.70686	0.00123378	-0.0413965	-0.121392	0.00137213	0.0176145
Pnpt1	6.70618	0.00123462	0.0212087	0.0348511	0.00137213	0.0176145
mt-Nd4	6.69441	0.0012492	-1.40497	-0.152149	0.00138902	0.0178099
Nubp1	6.69275	0.00125126	0.0815063	0.235792	0.0013909	0.0178125
Neurl3	6.68726	0.00125814	-0.0537767	-0.181768	0.0013984	0.0178443
Rnf4	6.68701	0.00125845	0.0926487	0.125553	0.0013984	0.0178443
Tprn	6.6882	0.00125696	0.0163481	0.0682548	0.0013984	0.0178443
Gm13139	6.67322	0.00127588	-0.131226	-0.18736	0.00141905	0.0180861
Ica1	6.66935	0.00128081	-0.0642407	-0.193747	0.00142656	0.0181601
Chsy1	6.66694	0.0012839	0.146227	0.226608	0.00142844	0.0181623
Sfpq	6.66282	0.00128918	0.252031	0.209754	0.00143031	0.0181645
Cnn2	6.65515	0.00129907	-0.12849	-0.184852	0.00144721	0.0183571
Atp1a1	6.65031	0.00130537	0.16913	0.173499	0.00145096	0.018361
Uhmk1	6.6489	0.0013072	0.100841	0.225596	0.00145096	0.018361
Rpl32	6.6372	0.00132254	-0.266927	-0.134886	0.00146222	0.0184597
Smim4	6.63552	0.00132476	-0.0955136	-0.222451	0.00146222	0.0184597
Vti1a	6.62772	0.0013351	0.0139867	0.0699231	0.00148099	0.0186746
Parp1	6.62268	0.00134184	0.131117	0.233973	0.0014885	0.018747
Atg2b	6.61884	0.00134698	0.0262635	0.0666294	0.00149226	0.01875
Idh1	6.62031	0.00134502	0.0744823	0.08945	0.00149226	0.01875
Vsir	6.61593	0.0013509	-0.0781808	-0.118664	0.00149413	0.0187515
Atp6v1g1	6.60916	0.00136005	0.126146	0.120276	0.00150164	0.0188235
Ncf4	6.60606	0.00136426	-0.0612534	-0.169632	0.00150727	0.0188719
Psma3	6.60262	0.00136894	0.21876	0.228964	0.00151478	0.0189437
Farsb	6.59632	0.00137758	0.141934	0.172102	0.00151854	0.0189683
Spin1	6.5916	0.00138408	-0.201465	-0.198067	0.00152041	0.0189696
Bop1	6.57815	0.00140277	0.0840935	0.230164	0.00153918	0.0191813
Samd9l	6.56515	0.00142108	-0.104076	-0.232711	0.0015542	0.0193458
Tcn2	6.56417	0.00142247	-0.120646	-0.225366	0.00155983	0.0193932
Wdr4	6.55887	0.00143	0.0565043	0.226535	0.00157109	0.0195105
Cldn15	6.55303	0.00143835	-0.0611318	-0.0941678	0.00158799	0.0196744
Dscc1	6.55255	0.00143905	-0.0216652	-0.130655	0.00158799	0.0196744
Atp5b	6.55135	0.00144076	0.265744	0.232429	0.00159174	0.019698
Bcas1	6.54964	0.00144322	-0.0390411	-0.232155	0.00159362	0.0196984
Oxnad1	6.54832	0.00144512	-0.00758565	-0.026264	0.00159737	0.0197219
Cd177	6.54577	0.00144881	-0.0529026	-0.229998	0.00159925	0.0197222
Adrbk1	6.52451	0.00147985	-0.0864817	-0.115964	0.00162928	0.0200461
Arpc3	6.51503	0.00149391	-0.222224	-0.226913	0.00163116	0.0200461
Stk26	6.51848	0.00148878	-0.166433	-0.208512	0.00162928	0.0200461
9030617O03Rik	6.50624	0.00150707	0.0251373	0.157914	0.00164805	0.0202304
Ubtf	6.50208	0.00151334	0.124652	0.206619	0.00165556	0.0202992
Emp3	6.49477	0.00152441	0.0802038	0.116837	0.00166307	0.0203678
Ccdc86	6.49437	0.00152502	0.0818276	0.206003	0.00166682	0.0203904
Alas1	6.47253	0.0015586	-0.0921667	-0.149276	0.00168559	0.0205963
Aars	6.4613	0.00157615	0.134103	0.141347	0.00171375	0.0209164
Snx18	6.45746	0.0015822	0.0571056	0.157806	0.00172313	0.0210069
Huwe1	6.45202	0.00159081	0.10718	0.231014	0.00173252	0.0210959
Timm10	6.45066	0.00159296	0.0357699	0.229384	0.0017344	0.0210959
Cit	6.44606	0.00160029	-0.0665181	-0.191324	0.00174566	0.0211845
Dtnbp1	6.44672	0.00159923	-0.0514416	-0.0915094	0.00174566	0.0211845
Dab2	6.43784	0.00161346	0.0601127	0.231275	0.00176068	0.0213424
Mthfd1	6.42512	0.00163407	0.142188	0.230775	0.00177757	0.0215227
Acbd3	6.41586	0.00164923	0.0321732	0.108292	0.00178508	0.0215873
Npepl1	6.41448	0.00165151	0.077617	0.230937	0.00178695	0.0215873
Drg2	6.40914	0.00166032	0.0765581	0.227192	0.00180385	0.0217667
Alkbh8	6.39866	0.00167776	0.0415996	0.221707	0.00181886	0.0218983
Mak	6.39924	0.0016768	0.0223933	0.229991	0.00181886	0.0218983
Hmgn1	6.39453	0.00168469	0.115542	0.201555	0.00182825	0.0219617
Pdcd5	6.39245	0.00168819	0.194997	0.228388	0.00182825	0.0219617
Esyt1	6.38923	0.00169362	0.116524	0.175511	0.001832	0.021982
Nrros	6.37693	0.00171453	0.215445	0.220762	0.00184139	0.0220697
Rpl12	6.36305	0.00173843	0.797906	0.197276	0.00186391	0.0223146
Erdr1	6.35734	0.00174835	0.0645724	0.221874	0.00187142	0.0223543
Plpp2	6.35793	0.00174733	0.0701357	0.214026	0.00187142	0.0223543
Zc3h15	6.35426	0.00175372	0.125092	0.22464	0.00187893	0.0224188
Csf1	6.35144	0.00175867	0.0307756	0.229687	0.00188456	0.0224358
Rpn1	6.34583	0.00176853	0.272921	0.152753	0.00188456	0.0224358
Map1lc3b	6.33749	0.00178332	-0.172696	-0.191701	0.00190145	0.0226116
Ehbp1l1	6.33042	0.00179594	0.109158	0.227052	0.00191647	0.0227364
Puf60	6.32602	0.00180383	-0.117451	-0.154745	0.00191835	0.0227364
Rnf166	6.32967	0.00179728	-0.078731	-0.209092	0.00191647	0.0227364
Gskip	6.32335	0.00180863	-0.0293574	-0.0713997	0.0019221	0.0227556
Gemin5	6.3226	0.00180999	0.0381895	0.156144	0.00192586	0.0227747
Rpl18	6.31995	0.00181478	-0.504051	-0.228403	0.00192961	0.0227907
Wdr83os	6.31801	0.0018183	0.0473031	0.185926	0.00193149	0.0227907
AU022252	6.31289	0.00182761	0.120616	0.228432	0.00194463	0.0229204
Trim25	6.28752	0.00187445	0.0812672	0.179705	0.00198592	0.0233775
Zfp36l1	6.28577	0.00187772	0.0386993	0.212968	0.0019878	0.0233775
Ankrd40	6.27776	0.00189279	0.0198564	0.224005	0.00199343	0.0234179
Cdc42se1	6.26223	0.00192233	0.135599	0.225527	0.00202909	0.0238064
Itgal	6.26108	0.00192454	-0.127222	-0.22811	0.00203097	0.0238064
Nampt	6.25037	0.00194522	0.133842	0.209486	0.00204599	0.023956
Setd3	6.24833	0.00194918	0.0682816	0.168606	0.00204974	0.0239737
Tbc1d20	6.24024	0.00196496	-0.0424177	-0.151373	0.002061	0.0240789
Padi4	6.23355	0.00197813	-0.0322242	-0.118763	0.00207414	0.0242059
Gnai2	6.22515	0.00199477	-0.329148	-0.213891	0.00209479	0.0244201
Trim13	6.22246	0.00200011	0.0556129	0.16151	0.00210042	0.024459
Ints2	6.20066	0.00204409	0.0793263	0.214328	0.00214172	0.0248584
Phgdh	6.19967	0.0020461	0.13564	0.226959	0.00214172	0.0248584
Rab34	6.19925	0.00204697	0.0508334	0.21787	0.00214172	0.0248584
Naa15	6.19653	0.00205253	0.159965	0.225764	0.00214923	0.0249184
Tmem108	6.19043	0.00206506	0.0576637	0.180218	0.00216049	0.0250217
Eif4h	6.17482	0.00209746	0.269792	0.225987	0.00219615	0.0253796
Wbscr22	6.17516	0.00209675	0.0983651	0.216204	0.00219615	0.0253796
Atp5g1	6.17045	0.00210661	0.25587	0.221033	0.00220741	0.0254545
Lmnb1	6.1726	0.00210211	0.101685	0.187953	0.00220741	0.0254545
Snx5	6.16637	0.0021152	0.165957	0.225071	0.00221492	0.0255135
Mtrr	6.16511	0.00211788	0.0201364	0.110911	0.00221868	0.0255292
Pinx1	6.16126	0.00212603	0.062848	0.218137	0.00222994	0.0256311
Eny2	6.14614	0.00215833	0.0836301	0.125581	0.00227311	0.026071
Ikbke	6.14549	0.00215972	-0.0382528	-0.133627	0.00227311	0.026071
Rps3a1	6.13638	0.00217944	-0.567272	-0.206168	0.00230502	0.0264086
Hypk	6.13277	0.0021873	0.117739	0.170659	0.00231253	0.0264662
Arhgef6	6.12948	0.0021945	-0.0518141	-0.069543	0.00232567	0.026588
Cks2	6.12604	0.00220203	0.195351	0.169872	0.00233693	0.0266881
Capns1	6.12071	0.00221378	-0.173971	-0.222657	0.00234444	0.0267452
Rbmxl1	6.10504	0.00224865	0.0917729	0.149364	0.0023801	0.027123
Ptgr1	6.09739	0.00226589	-0.204257	-0.224508	0.00239512	0.027265
Ncapd3	6.09286	0.00227614	-0.0822049	-0.122821	0.0024045	0.0273426
Rangrf	6.08775	0.00228777	0.0794355	0.215538	0.00241389	0.0273908
Tax1bp1	6.08783	0.00228759	0.16218	0.195414	0.00241389	0.0273908
Kdelc1	6.08416	0.00229598	0.105272	0.218551	0.00242328	0.0274681
Peg12	6.07874	0.00230842	0.00804817	0.100439	0.00243829	0.0276089
Kctd20	6.05782	0.0023571	0.0692561	0.0967501	0.00247771	0.028017
Nek6	6.05518	0.00236332	0.0544341	0.194431	0.00247959	0.028017
Ak4	6.05111	0.00237294	-0.145632	-0.176985	0.00248522	0.0280212
Tmem86a	6.05107	0.00237304	-0.0245703	-0.122501	0.00248522	0.0280212
Itgb5	6.04839	0.00237938	0.023156	0.22356	0.00249085	0.0280253
Kmt2b	6.04629	0.00238438	0.0599321	0.224229	0.00249085	0.0280253
Max	6.04221	0.0023941	0.150139	0.175227	0.00250023	0.0281013
Gpr150	6.03248	0.00241746	0.0115277	0.181082	0.00251901	0.0282824
Ranbp3	6.02672	0.00243137	0.0894183	0.221245	0.00253402	0.0284211
Srsf9	6.00212	0.00249178	0.101072	0.220631	0.00259409	0.0290641
Mogat2	5.99467	0.00251037	-0.0469369	-0.164003	0.0026091	0.0291405
Snx27	5.99689	0.00250483	0.126181	0.220857	0.00260723	0.0291405
Urm1	5.99574	0.00250768	0.0479265	0.172226	0.0026091	0.0291405
Fos	5.98578	0.00253273	0.0362683	0.18828	0.00261661	0.0291937
Cftr	5.98326	0.00253909	-0.0174889	-0.158275	0.00262412	0.0292469
Tcaf1	5.97879	0.00255045	-0.0162553	-0.165835	0.00264101	0.0294044
Klhl6	5.97159	0.00256883	-0.100007	-0.216584	0.00265791	0.0295616
Eif3h	5.96528	0.00258507	-0.394142	-0.222582	0.00266917	0.0296458
Mrps26	5.96349	0.00258969	0.089847	0.218181	0.00267105	0.0296458
Atp5j2	5.95263	0.00261789	0.139107	0.185461	0.00270296	0.0299688
Faap20	5.93459	0.00266541	-0.0817733	-0.222002	0.00277053	0.0306861
Ssrp1	5.92574	0.00268905	0.127781	0.215777	0.00280432	0.031028
Cdr2	5.90952	0.00273292	0.0300755	0.220385	0.00285875	0.0315975
Cog8	5.90408	0.00274781	0.0579289	0.221572	0.00286626	0.0316149
Gspt2	5.90301	0.00275072	0.0393145	0.221563	0.00286626	0.0316149
Klhl2	5.89975	0.00275969	0.0711555	0.189933	0.00288315	0.0317684
Usp1	5.88302	0.00280614	0.162803	0.215802	0.00293571	0.032314
Sag	5.87413	0.00283113	0.0689548	0.204209	0.00294885	0.0324252
Gapvd1	5.87088	0.00284033	-0.0811736	-0.122948	0.00296387	0.0325567
E2f1	5.85638	0.00288172	-0.0486424	-0.0901377	0.00300516	0.032963
Pabpc4	5.85557	0.00288403	0.120532	0.17469	0.00300704	0.032963
Gm38025	5.85236	0.00289329	-0.0108924	-0.0523952	0.0030183	0.0330185
Il4ra	5.85222	0.00289369	0.0479459	0.171186	0.0030183	0.0330185
Eml4	5.85127	0.00289645	0.0581769	0.220249	0.00302206	0.0330256
Snx1	5.84883	0.00290351	0.0454322	0.130843	0.00302956	0.0330738
Acot7	5.84339	0.0029193	0.142412	0.17535	0.00304083	0.033095
Mgst1	5.84509	0.00291436	-0.204881	-0.204574	0.00304083	0.033095
Osm	5.84638	0.0029106	0.0401633	0.220361	0.00303707	0.033095
Rplp1	5.842	0.00292336	0.179393	0.17782	0.00304458	0.033102
Metap2	5.836	0.0029409	0.19011	0.157707	0.00305772	0.033211
Abi3	5.83198	0.00295272	0.0278293	0.219341	0.00307086	0.0332859
Dlat	5.83226	0.0029519	0.0621722	0.0956523	0.00307086	0.0332859
Lmbr1	5.82556	0.0029717	-0.0265982	-0.145324	0.00308588	0.0334146
Slc43a2	5.81596	0.00300028	0.043548	0.207644	0.00311028	0.0336447
Fasn	5.81206	0.00301198	0.1447	0.174754	0.00312717	0.0337931
Eif2b3	5.80446	0.00303491	0.0248069	0.176569	0.00315345	0.0340426
Csnk2a2	5.80077	0.00304611	0.00492047	0.0181113	0.0031741	0.0342308
Snx16	5.79573	0.00306144	0.000291223	0.00123056	0.00318536	0.0343175
Xlr4a	5.79103	0.00307583	-0.00333452	-0.0502462	0.00319099	0.0343434
Gm5595	5.78968	0.00307998	0.00327729	0.0541739	0.00320413	0.0344501
Dock5	5.78509	0.00309411	-0.107959	-0.20069	0.00322665	0.0346573
Hspa8	5.78348	0.00309911	0.308622	0.126809	0.00323979	0.0347633
Smpd4	5.77965	0.00311096	0.0539387	0.207967	0.00324542	0.0347887
C1galt1	5.77903	0.00311288	0.0925107	0.151964	0.00325106	0.0348141
Serp1	5.77633	0.00312127	0.296431	0.159005	0.0032642	0.0349197
Rogdi	5.77424	0.00312781	-0.0594772	-0.174306	0.00326795	0.0349248
Ly6i	5.77217	0.00313427	-0.0594667	-0.198099	0.00327546	0.0349699
Ncf1	5.76693	0.0031507	-0.186556	-0.188281	0.00329047	0.0350951
Stab1	5.76541	0.00315546	0.0369285	0.199075	0.00330174	0.03518
Mrps6	5.76132	0.00316838	0.0569925	0.217992	0.00331488	0.0352495
Papd7	5.76216	0.00316571	0.0549641	0.218515	0.00331488	0.0352495
Osbpl1a	5.76018	0.00317199	0.00533175	0.023333	0.00332238	0.0352789
Triobp	5.75937	0.00317455	-0.0734417	-0.136682	0.00332426	0.0352789
Map4k4	5.75314	0.00319433	0.0221923	0.198541	0.00334491	0.0353923
Rrs1	5.75551	0.00318679	0.141411	0.203382	0.00334115	0.0353923
Tmc8	5.75356	0.00319299	-0.0247532	-0.156891	0.00334303	0.0353923
Hnrnpm	5.74957	0.00320575	0.221301	0.172604	0.00335805	0.035496
Ints5	5.74811	0.00321041	0.0561424	0.176081	0.00336368	0.0355203
Snhg8	5.74097	0.00323337	-0.113831	-0.180452	0.0033862	0.0356874
St14	5.73995	0.00323665	0.0411414	0.133513	0.0033862	0.0356874
Eif5b	5.73701	0.00324615	0.19515	0.218413	0.00340122	0.0358103
Pgm3	5.73528	0.00325175	0.0361849	0.147354	0.00340873	0.0358539
Ino80e	5.73265	0.00326031	0.122872	0.216972	0.00342187	0.0359566
Palm	5.72888	0.00327259	-0.0703239	-0.128924	0.00343313	0.0360394
Exoc4	5.71707	0.00331139	-0.128769	-0.200818	0.00345941	0.0361727
Mgll	5.7208	0.00329909	-0.0835927	-0.172498	0.0034519	0.0361727
Nle1	5.71702	0.00331156	0.0478821	0.21421	0.00345941	0.0361727
mt-Nd5	5.71936	0.00330381	-0.618975	-0.203106	0.00345753	0.0361727
Creld2	5.7144	0.00332021	0.084486	0.204158	0.00346316	0.0361765
Dfna5	5.71168	0.00332923	-0.0523764	-0.207267	0.00347067	0.036184
Tmem150b	5.71277	0.00332563	-0.00862914	-0.0939718	0.00346879	0.036184
Heatr3	5.70891	0.00333845	0.0336135	0.185398	0.00348193	0.0362659
Rin1	5.70503	0.00335139	-0.00171308	-0.0113025	0.00349695	0.0363867
Pycrl	5.69643	0.00338029	0.0662849	0.216805	0.00352135	0.0366049
Sigmar1	5.68617	0.00341504	0.0907611	0.206681	0.00354763	0.0367704
Snrk	5.68624	0.00341483	0.058153	0.202922	0.00354763	0.0367704
Ubxn2b	5.68618	0.00341501	0.0496534	0.209917	0.00354763	0.0367704
Fto	5.68375	0.00342332	0.094057	0.217183	0.00356077	0.0368707
Fgf11	5.6703	0.00346955	0.0111432	0.130102	0.00360582	0.037301
Hif1a	5.66284	0.00349546	0.0808327	0.100884	0.00363022	0.0374443
Snrnp35	5.66366	0.00349262	0.0192441	0.205249	0.00363022	0.0374443
Tmem70	5.66544	0.00348643	0.0767773	0.201936	0.00362647	0.0374443
Hccs	5.65953	0.00350703	0.0642617	0.214313	0.00364899	0.0376015
Ccnb2	5.65763	0.00351371	-0.241674	-0.193883	0.0036565	0.0376425
Ftsj3	5.65518	0.00352228	0.0553298	0.216293	0.00366964	0.0377049
Ubr2	5.6555	0.00352117	-0.101918	-0.216522	0.00366776	0.0377049
Unc13d	5.65107	0.00353677	0.24666	0.214103	0.00368841	0.0378613
Eef2kmt	5.64185	0.00356945	0.0727926	0.216282	0.00371844	0.0381328
Isyna1	5.64075	0.00357338	0.0963886	0.216047	0.00372407	0.0381538
Sirpa	5.62978	0.0036127	0.186006	0.152567	0.00375786	0.038463
Dym	5.62794	0.00361934	-0.0105597	-0.0453121	0.00376349	0.0384689
Gm4737	5.62634	0.00362512	0.0337201	0.129607	0.003771	0.0384689
Pag1	5.62664	0.00362403	0.056934	0.215843	0.003771	0.0384689
Zfyve27	5.62547	0.00362827	-0.0674799	-0.215621	0.00377288	0.0384689
Ifitm1	5.61417	0.00366942	0.645417	0.109692	0.00381042	0.0388145
Shc1	5.60751	0.00369385	-0.0967071	-0.207901	0.00383482	0.0390258
Timm17b	5.60599	0.00369947	-0.108576	-0.208097	0.00384608	0.0391031
Gria3	5.59811	0.00372865	0.0525098	0.198653	0.00387236	0.0392952
Tecr	5.59821	0.00372831	-0.239683	-0.203366	0.00387236	0.0392952
Cwf19l2	5.59492	0.00374056	0.0293999	0.0946191	0.00387611	0.0392959
Eif5a2	5.59145	0.00375353	0.0185846	0.215351	0.00389113	0.0394106
Prkag1	5.58756	0.00376814	-0.0433494	-0.111342	0.00390802	0.0394692
Slc25a44	5.58904	0.00376255	0.0459003	0.215591	0.00390239	0.0394692
Tspan31	5.58693	0.00377048	0.0898744	0.211432	0.00390802	0.0394692
Rrh	5.5829	0.00378569	0.0147262	0.214754	0.00391929	0.0395455
Tsr1	5.58092	0.00379316	0.0786058	0.210249	0.00392679	0.0395837
Nop9	5.57707	0.00380778	0.079772	0.207484	0.00394557	0.0397353
Sgms1	5.56651	0.00384812	0.0269065	0.212126	0.00399249	0.04017
Fam188a	5.56349	0.00385972	0.115502	0.211265	0.00400188	0.0402264
1810009A15Rik	5.55711	0.00388436	0.0837295	0.203435	0.00401689	0.040282
Muc13	5.5534	0.00389875	-0.0455142	-0.0667535	0.00402252	0.040282
Ube2v1	5.55691	0.00388513	0.125767	0.149755	0.00401689	0.040282
Usp25	5.55558	0.00389028	0.0322547	0.0640383	0.00402065	0.040282
Ankrd28	5.55273	0.00390139	-0.0729944	-0.118855	0.00403003	0.0403192
Git1	5.5473	0.00392258	0.0583151	0.214179	0.00405256	0.0405061
Sav1	5.54463	0.00393303	-0.0972166	-0.1574	0.00405631	0.0405061
Shmt2	5.54285	0.00394002	0.139392	0.205418	0.00406382	0.0405431
Ldhb	5.53833	0.00395782	-0.0275325	-0.1713	0.00407321	0.0405607
Paics	5.54045	0.00394948	0.0432287	0.0297176	0.00406945	0.0405607
Kif18b	5.5332	0.00397815	-0.0125405	-0.0489429	0.00409385	0.0407283
Prr22	5.53071	0.00398802	0.0118024	0.208585	0.00410699	0.0408209
Rnf157	5.52838	0.00399731	0.0246204	0.147868	0.00411638	0.040876
Mrpl41	5.52055	0.00402868	0.0573326	0.103113	0.00415204	0.0411918
Oaz1	5.50023	0.00411116	0.358329	0.210325	0.00423463	0.0419721
Csde1	5.49905	0.00411604	0.219964	0.198873	0.00424777	0.0420632
E2f3	5.49323	0.00414001	0.0516157	0.205457	0.00426842	0.0421501
Narf	5.49315	0.00414033	-0.0293107	-0.165916	0.00426842	0.0421501
Nup205	5.49448	0.00413484	0.0655127	0.208486	0.00426466	0.0421501
Thoc3	5.49219	0.00414429	0.111696	0.200647	0.00427405	0.0421667
Mark3	5.4878	0.00416248	0.0605155	0.176078	0.00428719	0.0422572
Flywch2	5.4857	0.0041712	-0.0317364	-0.160359	0.00429282	0.0422736
Glrx2	5.47901	0.00419916	-0.0296436	-0.0588468	0.00431722	0.0424746
Rpl21	5.47769	0.00420466	-0.578459	-0.176367	0.00432661	0.0425277
D930015E06Rik	5.46813	0.00424497	-0.0535349	-0.196368	0.00437541	0.0429677
Acot2	5.46248	0.00426899	-0.0073014	-0.100694	0.00439043	0.0430331
Hnrnph1	5.46135	0.0042738	0.244677	0.1622	0.00439418	0.0430331
Marveld1	5.46093	0.00427556	-0.0828472	-0.184638	0.00439418	0.0430331
Dbr1	5.45929	0.00428261	0.0304306	0.10061	0.00440169	0.0430459
Gpatch4	5.45839	0.00428644	0.0494441	0.205675	0.00440357	0.0430459
Cd300lf	5.45586	0.00429727	-0.0453751	-0.155286	0.00442234	0.0431897
Rmi2	5.45326	0.00430842	0.141461	0.198112	0.00443735	0.0432967
Paox	5.44998	0.00432254	-0.074232	-0.180931	0.00444674	0.0433486
Gorasp2	5.44117	0.00436074	0.126179	0.193768	0.00448991	0.0436895
Qdpr	5.44114	0.00436085	0.108711	0.183111	0.00448991	0.0436895
C2cd2l	5.43976	0.00436685	0.03687	0.200668	0.00449554	0.0437044
Mto1	5.43462	0.00438932	0.0648867	0.211888	0.00451244	0.0438286
Crtc2	5.42073	0.00445057	-0.0527206	-0.124128	0.00459503	0.0445902
Jun	5.41448	0.00447839	0.0630085	0.192781	0.00461567	0.0447498
Srpk2	5.41294	0.00448528	-0.147068	-0.211431	0.00462506	0.0448
Papola	5.40501	0.00452093	0.121991	0.185535	0.00467011	0.0451953
Immt	5.39415	0.00457018	0.142222	0.210398	0.0047283	0.0456936
Txn2	5.39406	0.0045706	0.16897	0.188495	0.00473017	0.0456936
Ap3m1	5.39178	0.00458101	0.0366778	0.051497	0.00474707	0.0458152
Cyp2e1	5.38804	0.00459811	0.00584769	0.108574	0.00477522	0.0460217
Lair1	5.38746	0.00460081	-0.108555	-0.20171	0.0047771	0.0460217
Tmpo	5.38219	0.00462506	0.195571	0.193539	0.00481089	0.0463053
Ddx41	5.38004	0.00463498	0.0599317	0.209251	0.00482215	0.0463718
Smc5	5.37809	0.00464399	-0.0527639	-0.171224	0.00483717	0.0464743
Rin2	5.37305	0.00466743	0.0187662	0.198368	0.00485406	0.0465946
Ada	5.37005	0.0046814	-0.0226121	-0.161073	0.00487283	0.0467086
Eif5	5.36963	0.00468337	0.219679	0.182653	0.00487471	0.0467086
Abcd1	5.36418	0.00470891	0.069859	0.210712	0.00489348	0.0468464
Gramd3	5.35677	0.00474387	0.00300077	0.0168352	0.00493102	0.0471634
Sh3bgrl2	5.3544	0.00475511	0.00263784	0.0411162	0.00494603	0.0472646
Bms1	5.35367	0.00475856	0.0636964	0.194227	0.00495167	0.047276
Tbrg1	5.35197	0.00476661	-0.00290059	-0.0088159	0.00496293	0.0473411
Ncapd2	5.35114	0.00477059	-0.156795	-0.210586	0.00497231	0.0473882
Dpy19l3	5.34646	0.00479293	-0.0252598	-0.202683	0.00499108	0.0475246
Mrpl38	5.34314	0.00480882	0.0574208	0.20442	0.00500235	0.0475825
Strap	5.34205	0.00481404	0.174023	0.210736	0.0050061	0.0475825

## Sheet: cluster 2
Description: This table records the significant differentially expressed genes for profile 1 in cluster 4
gene	stat	pval	mean_diff	cohen	pcali	padj
1110008P14Rik	48.7479	1.36412e-21	0.224469	0.433571	0	0
1190002N15Rik	23.0501	1.14426e-10	-0.144138	-0.319327	0	0
1600014C10Rik	29.6135	1.78957e-13	0.289251	0.34866	0	0
1700020L24Rik	49.083	9.85125e-22	0.2755	0.46227	0	0
1810037I17Rik	39.1312	1.59708e-17	0.533263	0.410021	0	0
3110082I17Rik	43.8793	1.55489e-19	0.188942	0.417406	0	0
A930007I19Rik	50.0802	3.74142e-22	0.128481	0.385415	0	0
AB124611	34.4118	1.6158e-15	0.270872	0.34948	0	0
Abcd2	39.6854	9.29526e-18	0.22279	0.381148	0	0
Abhd5	54.2533	6.54719e-24	0.471766	0.486026	0	0
Acadm	21.9251	3.47187e-10	-0.198245	-0.309369	0	0
Acta2	32.656	9.03193e-15	0.168315	0.37091	0	0
Actb	29.4625	2.07562e-13	1.35648	0.225564	0	0
Actn1	52.3302	4.21862e-23	0.346351	0.436811	0	0
Actn4	20.4517	1.48726e-09	0.236073	0.302048	0	0
Adgrg3	28.1171	7.78906e-13	0.202156	0.351591	0	0
Adipor2	36.4427	2.21239e-16	0.487783	0.392619	0	0
Adrbk2	28.0972	7.94244e-13	-0.0946444	-0.31899	0	0
Ahnak	40.8242	3.0578e-18	-0.277019	-0.36523	0	0
Aldh3b1	39.6622	9.50825e-18	0.123087	0.347045	0	0
Alox5	39.8028	8.28786e-18	0.103685	0.34181	0	0
Alox5ap	26.5395	3.67688e-12	0.410235	0.306677	0	0
Ank	36.6627	1.78403e-16	-0.138088	-0.377612	0	0
Anxa1	111.703	1.13478e-47	0.652757	0.644364	0	0
Anxa2	22.8099	1.45017e-10	0.352759	0.24119	0	0
Anxa3	47.329	5.4162e-21	0.400079	0.454848	0	0
Ap2s1	21.1635	7.36323e-10	0.238811	0.304386	0	0
Ap3s1	28.4158	5.80669e-13	0.845242	0.309473	0	0
Apex1	31.1015	4.15106e-14	-0.333464	-0.363619	0	0
Apobec3	20.3092	1.71203e-09	-0.234203	-0.301012	0	0
App	49.1466	9.26115e-22	0.485839	0.461023	0	0
Arl4c	22.7415	1.55142e-10	-0.0776032	-0.286618	0	0
Asprv1	20.3634	1.62275e-09	0.0290846	0.140493	0	0
Atp1a1	33.6477	3.41615e-15	-0.494003	-0.384757	0	0
Atp1b3	47.9124	3.07197e-21	-0.969393	-0.453581	0	0
Atp5b	20.4529	1.48541e-09	0.344161	0.301661	0	0
Atp6v0a1	103.882	1.75346e-44	0.40047	0.644177	0	0
Atp6v0c	48.9972	1.07081e-21	0.854849	0.463551	0	0
Atp6v0d1	32.1605	1.46847e-14	0.375624	0.371592	0	0
Atp6v1a	78.499	4.92181e-34	0.955997	0.581542	0	0
B2m	40.1992	5.62819e-18	-1.65752	-0.418172	0	0
B4galt4	24.1775	3.76531e-11	-0.0821545	-0.325344	0	0
Banf1	24.1598	3.8316e-11	-0.518144	-0.309662	0	0
Basp1	80.2096	9.62074e-35	-0.621931	-0.576996	0	0
Bcl11a	54.0924	7.65126e-24	-0.182927	-0.483029	0	0
Bcl2	128.646	1.56642e-54	-0.40582	-0.73113	0	0
Bcl2l11	26.4095	4.17889e-12	-0.26334	-0.342658	0	0
Bex6	63.7915	6.55062e-28	-0.196969	-0.52596	0	0
Bmyc	60.4827	1.58955e-26	-0.197556	-0.503054	0	0
Brip1os	25.8162	7.49397e-12	0.281837	0.329952	0	0
Bst1	30.32	8.94032e-14	0.0996413	0.308655	0	0
Btf3	25.3959	1.13362e-11	-0.770362	-0.334059	0	0
C1galt1	25.9048	6.86813e-12	0.186638	0.33878	0	0
C1galt1c1	45.4607	3.33415e-20	0.169203	0.404214	0	0
C1qbp	100.304	5.09961e-43	-1.1081	-0.653108	0	0
C3	31.6692	2.37781e-14	0.124336	0.358241	0	0
C3ar1	25.265	1.28961e-11	-0.185	-0.324495	0	0
C5ar1	42.0346	9.38804e-19	0.0893869	0.283493	0	0
Cacybp	22.4107	2.15018e-10	-0.412746	-0.315644	0	0
Calm1	58.8024	8.04734e-26	1.0981	0.487134	0	0
Calr	44.9744	5.35234e-20	1.22828	0.400881	0	0
Capg	24.5649	2.57051e-11	0.157427	0.272717	0	0
Capns1	20.8951	9.59781e-10	0.244567	0.293285	0	0
Card19	27.483	1.45318e-12	0.266769	0.33803	0	0
Cbx6	28.5885	4.89999e-13	-0.12477	-0.341228	0	0
Ccdc125	31.5559	2.65746e-14	0.154041	0.373702	0	0
Ccl4	33.2678	4.95755e-15	-0.665849	-0.372739	0	0
Ccnd1	31.7296	2.24097e-14	-0.111255	-0.370523	0	0
Ccnd2	40.7086	3.42313e-18	-0.366633	-0.410628	0	0
Ccnd3	87.1227	1.3347e-37	0.706001	0.596346	0	0
Ccng1	24.4709	2.81999e-11	0.193873	0.327489	0	0
Ccr1	24.0222	4.3883e-11	0.313041	0.298812	0	0
Ccr2	77.488	1.29256e-33	-0.804951	-0.563477	0	0
Ccr5	32.0254	1.67652e-14	-0.114892	-0.365035	0	0
Cct3	29.0891	2.99587e-13	-0.399676	-0.358967	0	0
Cd27	21.0373	8.34085e-10	-0.0343683	-0.251778	0	0
Cd28	81.4165	3.04425e-35	-0.362045	-0.591161	0	0
Cd300lf	22.93	1.28817e-10	0.141242	0.296481	0	0
Cd34	102.274	7.96722e-44	-0.423371	-0.65077	0	0
Cd63	82.6003	9.85467e-36	0.704837	0.591519	0	0
Cd74	166.781	9.75965e-70	-0.840248	-0.739094	0	0
Cd81	58.2909	1.31887e-25	0.493742	0.501066	0	0
Cdk4	92.0005	1.30532e-39	-0.890945	-0.60687	0	0
Cdk6	192.687	6.92982e-80	-1.09228	-0.881252	0	0
Ceacam1	65.9009	8.60511e-29	0.156389	0.467764	0	0
Cebpb	24.0735	4.17188e-11	0.704272	0.315769	0	0
Chil3	147.304	5.1904e-62	0.602644	0.671402	0	0
Chp1	76.5966	3.02936e-33	0.756599	0.547298	0	0
Ciita	34.7673	1.14063e-15	-0.0535906	-0.288028	0	0
Ckap4	65.6651	1.07947e-28	0.556853	0.497423	0	0
Ckb	29.5841	1.84198e-13	-0.0773469	-0.349186	0	0
Cldn15	43.4186	2.43581e-19	0.146825	0.437103	0	0
Clec12a	36.1209	3.03116e-16	0.275712	0.392208	0	0
Clec4a1	59.893	2.80819e-26	-0.184898	-0.416258	0	0
Clec4d	26.7737	2.92012e-12	-0.282763	-0.320382	0	0
Clec5a	35.9431	3.60756e-16	0.395561	0.398605	0	0
Clu	29.6712	1.69085e-13	0.043572	0.321601	0	0
Cndp2	26.9277	2.50932e-12	0.308117	0.345202	0	0
Cotl1	43.8216	1.64481e-19	0.240685	0.40704	0	0
Crtap	23.6984	6.03806e-11	-0.203354	-0.321864	0	0
Cse1l	23.0021	1.19978e-10	-0.343833	-0.316572	0	0
Csf2ra	21.865	3.68426e-10	0.210042	0.309603	0	0
Cstb	66.694	4.01397e-29	0.677044	0.530761	0	0
Ctnnb1	23.3755	8.30149e-11	-0.39836	-0.313062	0	0
Ctnnd2	35.4275	5.97611e-16	-0.0712421	-0.377956	0	0
Ctsc	192.164	1.10672e-79	4.14574	0.837744	0	0
Ctsd	43.7043	1.84396e-19	0.388484	0.414157	0	0
Ctsg	73.3295	6.89873e-32	1.38743	0.561248	0	0
Ctsh	29.5581	1.88961e-13	-0.143032	-0.31909	0	0
Ctsl	29.9114	1.3355e-13	0.203677	0.342579	0	0
Cttnbp2nl	22.2921	2.41695e-10	-0.0723775	-0.312398	0	0
Cx3cr1	32.4873	1.06574e-14	-0.0994733	-0.353595	0	0
Cxcr2	48.4836	1.76348e-21	0.16969	0.390407	0	0
Cyba	27.4328	1.52665e-12	0.326864	0.348885	0	0
Cysltr1	26.0226	6.11568e-12	-0.0677404	-0.298708	0	0
Dbi	33.4572	4.1176e-15	0.532254	0.383907	0	0
Ddt	47.2368	5.92404e-21	-0.324288	-0.42555	0	0
Dgat2	60.5897	1.43372e-26	0.230616	0.512565	0	0
Dmkn	369.94	9.96415e-146	2.68132	1.16346	0	0
Dmxl2	22.9768	1.23012e-10	0.212588	0.30352	0	0
Dstn	180.161	5.36842e-75	1.08458	0.856101	0	0
Dut	39.5227	1.08955e-17	-0.747743	-0.416728	0	0
Edem1	28.9996	3.27102e-13	0.467057	0.358307	0	0
Eef1a1	167.643	4.46084e-70	-8.04483	-0.828233	0	0
Eef1b2	62.1318	3.24097e-27	-1.27839	-0.51712	0	0
Eif4b	43.8449	1.60794e-19	-0.763329	-0.438375	0	0
Eif5a	64.2839	4.07777e-28	1.47019	0.504081	0	0
Elane	307.262	3.96e-123	3.05036	1.07429	0	0
Emp1	60.4255	1.67975e-26	-0.246775	-0.512622	0	0
Eno1	33.1802	5.40238e-15	0.337604	0.381321	0	0
Epb41l4b	48.1681	2.39602e-21	-0.12636	-0.444458	0	0
F10	45.6416	2.79592e-20	0.370257	0.432536	0	0
F13a1	129.241	9.01598e-55	0.843297	0.721767	0	0
F7	107.057	8.86368e-46	0.58007	0.627577	0	0
Fads3	27.2904	1.75621e-12	-0.0894242	-0.34644	0	0
Fam65b	52.4799	3.64901e-23	0.300155	0.401883	0	0
Fam84b	45.2767	3.98778e-20	-0.174997	-0.436579	0	0
Fbl	30.2661	9.42594e-14	-0.292221	-0.366334	0	0
Fbxl5	37.8389	5.64693e-17	0.265716	0.360869	0	0
Fcer1g	24.6729	2.3108e-11	0.849018	0.331116	0	0
Fcgr1	20.9376	9.20309e-10	0.13503	0.276958	0	0
Fcgr3	86.6158	2.16046e-37	0.892458	0.609463	0	0
Fcnb	81.9805	1.77859e-35	0.160185	0.492017	0	0
Fgr	53.4476	1.42864e-23	0.198585	0.444534	0	0
Fkbp1a	29.7145	1.62049e-13	-0.494022	-0.311754	0	0
Flna	37.0191	1.25891e-16	0.48027	0.386734	0	0
Foxp1	24.858	1.92574e-11	-0.227724	-0.332453	0	0
Frmd4b	28.3262	6.34116e-13	-0.103298	-0.345212	0	0
Fth1	197.446	9.81202e-82	-6.37598	-0.884202	0	0
Fyn	20.9275	9.2958e-10	-0.0869409	-0.305258	0	0
G0s2	23.7698	5.62762e-11	0.0673139	0.324358	0	0
G3bp1	22.0149	3.17743e-10	-0.444949	-0.311352	0	0
G6pdx	122.739	3.79564e-52	1.02684	0.70945	0	0
Gabarap	25.7698	7.84453e-12	0.405888	0.336874	0	0
Gapdh	34.5459	1.41686e-15	4.42016	0.388488	0	0
Gapt	20.9664	8.9454e-10	0.162557	0.299404	0	0
Gar1	32.9731	6.61863e-15	-0.337448	-0.382089	0	0
Gas5	26.6108	3.42769e-12	-0.471269	-0.336601	0	0
Gca	29.6038	1.80659e-13	0.0704512	0.350559	0	0
Gchfr	27.5196	1.4017e-12	0.0962778	0.28663	0	0
Gclm	57.4742	2.90333e-25	1.07298	0.498074	0	0
Gda	194.41	1.48118e-80	1.6735	0.87759	0	0
Gfi1	27.1198	2.07715e-12	0.0926574	0.311346	0	0
Glipr1	28.3397	6.25747e-13	-0.470911	-0.332651	0	0
Glipr2	101.25	2.08996e-43	0.530907	0.635537	0	0
Glrx	56.9411	4.86073e-25	0.476543	0.466361	0	0
Gm20658	28.6995	4.39359e-13	0.109145	0.356902	0	0
Gm5483	26.5704	3.56663e-12	0.0894691	0.245496	0	0
Gpr171	20.333	1.6722e-09	-0.126135	-0.298599	0	0
Gpr183	33.4993	3.95128e-15	-0.226326	-0.379093	0	0
Gpr84	25.3736	1.15882e-11	0.119867	0.32884	0	0
Gpx1	68.3095	8.50075e-30	1.51488	0.541633	0	0
Gpx3	22.6382	1.71789e-10	0.0525882	0.273038	0	0
Gpx4	22.355	2.27171e-10	0.374297	0.30778	0	0
Grina	32.1465	1.48878e-14	0.193149	0.357865	0	0
Gsn	23.2529	9.36829e-11	0.230187	0.153492	0	0
Gsr	135.051	4.15322e-57	1.66851	0.744787	0	0
Gstm1	176.577	1.36415e-73	1.49258	0.848936	0	0
Gtf3c1	22.2935	2.41378e-10	-0.136642	-0.315042	0	0
Gyg	22.4819	2.00424e-10	0.184165	0.303527	0	0
H2-Aa	95.6646	4.07211e-41	-1.19661	-0.510729	0	0
H2-Ab1	21.0813	7.98565e-10	-0.077216	-0.230321	0	0
H2-DMa	37.6173	7.01341e-17	-0.139997	-0.364064	0	0
H2-Eb1	92.9171	5.47898e-40	-0.600132	-0.49414	0	0
H2-K1	28.3799	6.01522e-13	-0.811779	-0.354617	0	0
H2afy	283.447	2.36861e-114	-6.25228	-1.03936	0	0
Hist1h1c	42.0139	9.58011e-19	0.279151	0.359689	0	0
Hk1	24.2435	3.52813e-11	0.187251	0.315486	0	0
Hk3	69.6488	2.35e-30	0.379381	0.545268	0	0
Hmgb1	44.5067	8.43961e-20	-0.958551	-0.442421	0	0
Hmgb2	24.3755	3.0978e-11	0.867292	0.322024	0	0
Hmgn1	46.8781	8.39675e-21	-0.375371	-0.438852	0	0
Hmgn3	54.001	8.35915e-24	-0.19927	-0.48552	0	0
Hnrnpa1	36.0735	3.17537e-16	-0.366416	-0.389236	0	0
Hnrnpa2b1	24.4281	2.94146e-11	-0.975225	-0.327761	0	0
Hnrnpc	21.9977	3.23195e-10	-0.616313	-0.311819	0	0
Hopx	22.0893	2.9526e-10	0.0634268	0.298279	0	0
Hoxa7	26.1916	5.17829e-12	-0.10879	-0.341266	0	0
Hp	53.8816	9.38387e-24	0.667435	0.469888	0	0
Hpcal1	22.4262	2.11758e-10	0.20377	0.31342	0	0
Hpse	65.4312	1.35183e-28	0.509033	0.507389	0	0
Hsd11b1	66.4238	5.2046e-29	0.250361	0.508702	0	0
Hspa9	37.2221	1.03222e-16	-0.424096	-0.398901	0	0
Hspd1	56.8578	5.26847e-25	-0.704845	-0.488434	0	0
Hspe1	48.14	2.4625e-21	-0.881276	-0.4495	0	0
Hvcn1	20.3308	1.67588e-09	0.15821	0.294535	0	0
Idh2	20.9128	9.43156e-10	-0.283332	-0.301606	0	0
Ifi203	140.414	2.93853e-59	-0.963958	-0.75931	0	0
Ifitm3	32.7036	8.61995e-15	1.22696	0.379539	0	0
Ifitm6	54.983	3.23055e-24	0.441413	0.404085	0	0
Igf1r	56.3368	8.71909e-25	0.422998	0.486845	0	0
Ighm	45.2427	4.12197e-20	-0.37181	-0.431977	0	0
Igsf6	26.3595	4.38941e-12	0.340944	0.338813	0	0
Il1f9	26.484	3.88315e-12	0.0910839	0.30271	0	0
Il1r1	26.7795	2.90333e-12	-0.140199	-0.336035	0	0
Il1r2	84.9682	1.03467e-36	0.441674	0.52107	0	0
Impdh2	42.4012	6.56633e-19	-0.433165	-0.431584	0	0
Itgam	28.2535	6.81114e-13	0.325046	0.300735	0	0
Itgb2	174.101	1.28045e-72	1.44457	0.799959	0	0
Itgb3	21.3939	5.86521e-10	0.0850798	0.28491	0	0
Itm2b	52.5554	3.39138e-23	1.44107	0.472288	0	0
Jun	20.7498	1.1079e-09	-0.233952	-0.299364	0	0
Klf2	24.897	1.853e-11	0.185354	0.281758	0	0
Kmo	23.5646	6.88986e-11	-0.0867057	-0.318975	0	0
Lamp1	29.6698	1.69314e-13	0.565879	0.355906	0	0
Lamtor1	30.3644	8.55906e-14	0.360275	0.363522	0	0
Lasp1	35.1713	7.67987e-16	0.535089	0.373233	0	0
Lcn2	351.312	4.37726e-139	1.60037	0.993793	0	0
Lcp1	93.3266	3.71832e-40	1.40268	0.598258	0	0
Ldha	36.3755	2.36274e-16	-0.970169	-0.396193	0	0
Lgals3	58.7575	8.40411e-26	0.644842	0.468527	0	0
Lgmn	107.359	6.67408e-46	-0.295671	-0.650314	0	0
Lipg	43.6058	2.02969e-19	0.241195	0.409756	0	0
Llph	23.0734	1.11826e-10	-0.278185	-0.320206	0	0
Lox	71.3926	4.41292e-31	-0.29443	-0.554436	0	0
Lrg1	179.139	1.34942e-74	0.564785	0.8027	0	0
Ly6a	257.68	9.83161e-105	-2.57215	-0.984142	0	0
Ly6c1	25.0387	1.6116e-11	0.0904572	0.309536	0	0
Ly6c2	68.4478	7.44352e-30	0.30624	0.535103	0	0
Ly86	60.7352	1.24591e-26	-0.169595	-0.468962	0	0
Lyar	23.3888	8.19358e-11	-0.243613	-0.317319	0	0
Lyz2	158.121	2.59591e-66	4.14731	0.734736	0	0
Mak	26.1875	5.19957e-12	0.0462075	0.288663	0	0
Map1lc3b	21.1212	7.67748e-10	0.348528	0.306242	0	0
Mapk3	26.9114	2.55006e-12	0.210438	0.33945	0	0
Marcksl1	36.096	3.10612e-16	-0.260203	-0.367555	0	0
Mat2a	76.4636	3.44001e-33	-0.839965	-0.570028	0	0
Mcemp1	178.231	3.0643e-74	0.493989	0.785933	0	0
Med13l	30.7787	5.69828e-14	-0.243575	-0.363358	0	0
Mef2c	29.5203	1.96115e-13	-0.24007	-0.351628	0	0
Mgll	28.4352	5.69682e-13	0.0966206	0.304655	0	0
Mgst1	43.4077	2.46189e-19	0.302144	0.430657	0	0
Mgst2	43.3338	2.64571e-19	0.242615	0.430158	0	0
Mndal	25.7204	8.2353e-12	-0.186386	-0.331347	0	0
Mocos	26.5021	3.81486e-12	0.104043	0.29875	0	0
Mpc2	29.591	1.8295e-13	0.167351	0.317874	0	0
Mpo	199.028	2.38928e-82	1.19135	0.879407	0	0
Mpp1	119.596	7.09713e-51	1.06135	0.692725	0	0
Mrc1	34.6741	1.24977e-15	-0.395514	-0.367482	0	0
Mrpl33	43.4323	2.40359e-19	0.299742	0.436682	0	0
Ms4a3	81.0456	4.3351e-35	0.941296	0.567164	0	0
Ms4a4c	70.9142	6.98051e-31	-0.20353	-0.463437	0	0
Ms4a6b	39.3922	1.23763e-17	-0.19182	-0.374697	0	0
Ms4a6c	53.7013	1.11742e-23	-0.562108	-0.41629	0	0
Msra	21.3086	6.3803e-10	0.0859964	0.285073	0	0
Msrb1	108.439	2.42283e-46	0.84598	0.656506	0	0
Mxi1	42.5413	5.72812e-19	0.226504	0.427395	0	0
Myc	35.3884	6.2088e-16	-0.395946	-0.364292	0	0
Myl6	35.9612	3.54399e-16	0.737198	0.385394	0	0
Myo1f	21.2412	6.81985e-10	0.295816	0.30234	0	0
Naaa	57.8511	2.01721e-25	0.269735	0.467832	0	0
Naca	28.1979	7.19403e-13	-0.749726	-0.348851	0	0
Nap1l1	24.2546	3.48992e-11	-0.498889	-0.326664	0	0
Ncl	31.9411	1.82106e-14	-0.592832	-0.368991	0	0
Neu1	30.8482	5.32286e-14	0.175137	0.36964	0	0
Nfe2	29.8755	1.38343e-13	0.137733	0.354956	0	0
Nfkb1	21.2329	6.87583e-10	-0.350082	-0.307557	0	0
Nfkbia	84.3072	1.94051e-36	1.21824	0.523599	0	0
Nhp2l1	26.7025	3.13194e-12	-0.416881	-0.312607	0	0
Nme4	25.5741	9.5112e-12	-0.109038	-0.336318	0	0
Nolc1	44.9772	5.33772e-20	-0.436054	-0.444508	0	0
Npepps	44.5251	8.28948e-20	0.366205	0.427347	0	0
Npm1	159.995	4.69691e-67	-2.94582	-0.809493	0	0
Nrg1	41.9221	1.04773e-18	0.103006	0.429466	0	0
Nrp1	21.6311	4.64068e-10	0.143521	0.309286	0	0
Nt5dc2	28.3108	6.43813e-13	-0.209955	-0.237869	0	0
Nusap1	23.0033	1.19839e-10	0.156232	0.285608	0	0
Odc1	32.0167	1.69094e-14	-0.32672	-0.375302	0	0
Olfm1	238.399	1.88388e-97	-1.13292	-0.918311	0	0
Olfml2b	228.03	1.66738e-93	0.918626	0.896222	0	0
Osbpl3	44.3284	1.00396e-19	-0.129623	-0.440429	0	0
Ostf1	22.275	2.45819e-10	0.264037	0.309013	0	0
P4hb	91.1359	2.96157e-39	0.984075	0.611679	0	0
Pabpc1	72.0711	2.30289e-31	-2.01241	-0.535491	0	0
Paics	61.6765	5.02652e-27	-0.861219	-0.516622	0	0
Parp1	25.3616	1.17254e-11	-0.217521	-0.33396	0	0
Pcbp2	27.3678	1.62749e-12	-1.03763	-0.348613	0	0
Pde2a	21.8739	3.65176e-10	0.0699187	0.31215	0	0
Pdxk	21.8508	3.73607e-10	-0.211929	-0.300941	0	0
Pgd	54.6683	4.38099e-24	0.72449	0.485503	0	0
Phb2	29.795	1.49719e-13	-0.512083	-0.363041	0	0
Pim2	20.2617	1.79418e-09	-0.0876454	-0.300687	0	0
Pkm	37.2351	1.01911e-16	1.57375	0.404182	0	0
Pknox2	40.3926	4.65983e-18	0.201286	0.41499	0	0
Plin2	105.986	2.42577e-45	0.900585	0.651364	0	0
Plin3	48.0642	2.65054e-21	0.452488	0.446917	0	0
Plod3	44.7923	6.39091e-20	0.333914	0.443815	0	0
Plxnb2	50.4451	2.62556e-22	-0.29282	-0.470227	0	0
Pmaip1	28.9531	3.42428e-13	-0.220557	-0.357053	0	0
Ppic	28.6135	4.78077e-13	0.220614	0.355692	0	0
Ppp1r14b	32.1914	1.42456e-14	-0.410212	-0.375438	0	0
Ppp2cb	26.3691	4.34845e-12	0.198759	0.304139	0	0
Prdx1	40.0596	6.45004e-18	-0.661187	-0.419807	0	0
Prdx5	131.416	1.20099e-55	0.690713	0.713624	0	0
Prom1	58.4714	1.10785e-25	0.123752	0.497107	0	0
Prr11	29.3522	2.31322e-13	0.173177	0.35736	0	0
Prtn3	240.488	3.03552e-98	2.15397	0.942974	0	0
Psmb5	22.3833	2.20914e-10	0.201776	0.313016	0	0
Ptger4	23.5381	7.07212e-11	-0.110883	-0.323772	0	0
Ptges3	36.9613	1.33204e-16	-0.587303	-0.40354	0	0
Ptgr1	30.3202	8.93853e-14	0.25244	0.366457	0	0
Ptgs1	20.8355	1.01797e-09	0.0918219	0.303275	0	0
Ptpn6	27.2826	1.76977e-12	0.346622	0.341532	0	0
Ptprcap	47.189	6.20594e-21	-0.206367	-0.44319	0	0
Pxn	22.638	1.7182e-10	0.230867	0.317569	0	0
Pygl	47.4729	4.7093e-21	0.289686	0.448383	0	0
Qsox1	24.0939	4.08855e-11	0.101574	0.253245	0	0
Rab32	39.7868	8.41865e-18	0.297822	0.414049	0	0
Rab6a	21.2576	6.71022e-10	0.280459	0.307664	0	0
Rac2	38.4324	3.16127e-17	0.412184	0.397723	0	0
Rasa4	33.34	4.61907e-15	-0.158386	-0.383956	0	0
Rcl1	27.4695	1.47258e-12	-0.251448	-0.349042	0	0
Rftn1	60.5147	1.54132e-26	-0.32677	-0.512983	0	0
Rhog	57.254	3.5921e-25	0.596978	0.497064	0	0
Rnasek	27.0462	2.23324e-12	0.199343	0.340032	0	0
Rnf149	53.1814	1.84901e-23	-0.474472	-0.477595	0	0
Rnpep	31.1292	4.0396e-14	0.314481	0.364576	0	0
Rpl10a	32.3731	1.192e-14	-0.856492	-0.371785	0	0
Rpl27a	35.8883	3.80629e-16	-1.33582	-0.39065	0	0
Rpl4	45.8376	2.3104e-20	-1.48411	-0.410415	0	0
Rps11	20.5609	1.33515e-09	0.666497	0.29698	0	0
Rps20	21.1968	7.12527e-10	-0.882188	-0.30207	0	0
Rps24	50.3196	2.96557e-22	-1.59555	-0.466034	0	0
Rps27l	37.3376	9.21966e-17	-0.738293	-0.405394	0	0
Rsu1	21.9517	3.38199e-10	0.283777	0.312642	0	0
Runx3	35.8573	3.9234e-16	-0.139525	-0.389474	0	0
S100a1	29.5764	1.85589e-13	0.20433	0.334955	0	0
S100a11	70.3967	1.14675e-30	0.702325	0.539656	0	0
S100a4	31.5583	2.6513e-14	-0.444907	-0.336385	0	0
S100a6	253.969	2.44687e-103	2.45865	0.777396	0	0
S100a8	323.173	6.21225e-129	9.53478	0.913021	0	0
S100a9	229.208	5.92358e-94	9.24707	0.711293	0	0
Saa3	62.7291	1.82266e-27	0.92895	0.518634	0	0
Samsn1	33.9363	2.57476e-15	-0.274614	-0.384473	0	0
Sat1	36.7913	1.57303e-16	0.552818	0.395582	0	0
Satb1	37.8091	5.81388e-17	-0.115648	-0.406756	0	0
Scamp1	25.0316	1.62288e-11	0.23486	0.330003	0	0
Sell	32.6382	9.19119e-15	0.690788	0.380085	0	0
Sept2	20.86	9.93667e-10	-0.380353	-0.304357	0	0
Sept5	21.5485	5.03487e-10	0.0252559	0.191213	0	0
Serbp1	22.2626	2.48844e-10	-0.630468	-0.288839	0	0
Serinc3	47.4483	4.82309e-21	-1.30997	-0.454499	0	0
Serp1	46.346	1.40879e-20	1.02564	0.446313	0	0
Serpinb1a	44.0318	1.34029e-19	0.392699	0.391965	0	0
Set	130.786	2.15339e-55	-2.91083	-0.739585	0	0
Sgms2	89.0597	2.12151e-38	0.379485	0.587999	0	0
Sgpp1	23.0392	1.15665e-10	0.182012	0.320357	0	0
Sh3bp5	21.3401	6.18546e-10	0.141154	0.242698	0	0
Siglece	21.4374	5.61863e-10	0.04774	0.276022	0	0
Sipa1l1	30.615	6.69227e-14	-0.193062	-0.345113	0	0
Slc29a1	55.4539	2.04822e-24	-0.295725	-0.492153	0	0
Slc30a4	53.58	1.25676e-23	-0.204384	-0.472428	0	0
Slc6a6	32.3926	1.16948e-14	-0.34476	-0.374947	0	0
Slpi	41.1274	2.27464e-18	0.839553	0.419357	0	0
Smpdl3a	32.8946	7.14759e-15	0.153184	0.363618	0	0
Snhg4	28.0278	8.50349e-13	-0.151931	-0.337938	0	0
Snrpf	59.4663	4.23893e-26	-0.929	-0.508951	0	0
Socs2	55.8349	1.41666e-24	-0.382806	-0.489691	0	0
Sorl1	100.807	3.17516e-43	0.569997	0.618624	0	0
Sort1	104.973	6.28404e-45	0.556506	0.641697	0	0
Sox4	31.227	3.66976e-14	-0.115008	-0.367978	0	0
Spint1	52.6628	3.05622e-23	0.457117	0.455297	0	0
Sri	21.584	4.86152e-10	0.281664	0.307798	0	0
Srsf2	28.7054	4.36802e-13	-0.826986	-0.345515	0	0
Ssbp2	24.1202	3.98406e-11	-0.144649	-0.323066	0	0
Ssrp1	20.3895	1.5815e-09	-0.235217	-0.297399	0	0
Stom	24.1558	3.84681e-11	0.222329	0.324657	0	0
Sub1	40.0985	6.20943e-18	-0.517287	-0.417924	0	0
Surf4	31.0843	4.22149e-14	0.637887	0.361157	0	0
Svil	22.9555	1.25626e-10	0.244535	0.308446	0	0
Syce2	28.593	4.87806e-13	-0.222132	-0.353563	0	0
Syncrip	22.8033	1.45964e-10	-0.307651	-0.318186	0	0
Syne2	24.8865	1.87244e-11	0.0482379	0.331014	0	0
Tapbp	42.2138	7.88297e-19	-0.791078	-0.430122	0	0
Tbc1d16	26.5559	3.61801e-12	-0.0527948	-0.340529	0	0
Tbc1d8	23.6709	6.20384e-11	0.199481	0.302569	0	0
Tcf4	52.3959	3.95837e-23	-0.314982	-0.478528	0	0
Tcof1	45.669	2.72236e-20	-0.367474	-0.44152	0	0
Tgfbi	20.9107	9.45131e-10	0.25415	0.269834	0	0
Thy1	23.5654	6.88433e-11	0.130017	0.178951	0	0
Tln1	23.6207	6.51893e-11	0.361968	0.320676	0	0
Tm4sf1	26.2617	4.83312e-12	0.0626947	0.307315	0	0
Tmbim6	147.089	6.3269e-62	1.94028	0.768327	0	0
Tmem108	54.6415	4.49585e-24	-0.313573	-0.488124	0	0
Tmem123	40.11	6.14037e-18	-0.609212	-0.411258	0	0
Tmem176a	26.3461	4.44799e-12	-0.0994779	-0.312717	0	0
Tmem176b	96.9733	1.18221e-41	-0.710067	-0.632943	0	0
Tmem30a	24.2267	3.58723e-11	0.227716	0.26406	0	0
Tmsb4x	210.658	7.64956e-87	4.45193	0.867767	0	0
Tnfaip2	23.9655	4.64052e-11	0.360473	0.318237	0	0
Tnfrsf21	22.1201	2.86428e-10	0.153249	0.310805	0	0
Tnip3	85.964	4.01416e-37	-0.402277	-0.604687	0	0
Tomm20	52.3958	3.95874e-23	-0.68789	-0.470821	0	0
Tpt1	32.7221	8.46512e-15	-1.29752	-0.3792	0	0
Trem2	29.2055	2.6719e-13	0.131926	0.347062	0	0
Trem3	41.3708	1.79385e-18	0.241654	0.419865	0	0
Tsc22d1	32.7215	8.46991e-15	-0.20972	-0.354041	0	0
Tspan32	22.5482	1.87744e-10	0.0740013	0.302547	0	0
Tuba1c	21.6995	4.33765e-10	0.296116	0.309326	0	0
Tuba4a	108.539	2.20503e-46	0.781434	0.678283	0	0
Tubb4b	27.7531	1.11415e-12	0.453264	0.347903	0	0
Txndc5	24.1674	3.80303e-11	-0.271718	-0.327932	0	0
Uck2	47.3271	5.42616e-21	-0.527264	-0.4273	0	0
Ucp2	28.3117	6.43266e-13	0.610919	0.354255	0	0
Unc119	34.7777	1.12917e-15	0.128941	0.359833	0	0
Vasp	40.6486	3.62946e-18	0.270543	0.416332	0	0
Vcan	31.3471	3.26179e-14	0.4094	0.365618	0	0
Vcl	54.2839	6.35607e-24	0.219105	0.457366	0	0
Wfdc21	561.361	1.1901e-210	2.81243	1.31603	0	0
Xist	38.2349	3.83461e-17	-0.714123	-0.404952	0	0
Ybx1	101.468	1.70259e-43	-3.43833	-0.653362	0	0
Ybx3	67.9245	1.2304e-29	-1.0139	-0.529953	0	0
mt-Nd3	39.7705	8.55347e-18	0.869971	0.417999	0	0
AI839979	17.3162	3.30183e-08	0.157126	0.260183	2.01674e-06	2.96736e-05
Abcc5	15.0536	3.10357e-07	0.101772	0.251668	2.01674e-06	2.96736e-05
Acin1	14.4449	5.67396e-07	-0.252888	-0.254141	2.01674e-06	2.96736e-05
Actg1	17.8656	1.91713e-08	1.73915	0.264811	2.01674e-06	2.96736e-05
Add1	16.3596	8.5112e-08	0.178569	0.269844	2.01674e-06	2.96736e-05
Ak2	16.4358	7.89281e-08	-0.278446	-0.270234	2.01674e-06	2.96736e-05
Alas1	19.2117	5.06427e-09	0.132403	0.292699	2.01674e-06	2.96736e-05
Aldh1b1	14.5798	4.96346e-07	-0.057382	-0.252681	2.01674e-06	2.96736e-05
Aldoa	13.6298	1.27326e-06	0.576345	0.243247	2.01674e-06	2.96736e-05
Anxa6	15.7859	1.50233e-07	-0.217229	-0.250218	2.01674e-06	2.96736e-05
Ap3m1	15.5852	1.83281e-07	0.201058	0.258358	2.01674e-06	2.96736e-05
Arap1	15.0599	3.08408e-07	0.134506	0.258177	2.01674e-06	2.96736e-05
Arid3a	18.1392	1.46254e-08	0.152596	0.284171	2.01674e-06	2.96736e-05
Arl6ip5	14.8277	3.88224e-07	-0.116878	-0.255311	2.01674e-06	2.96736e-05
Arpc1b	18.1267	1.48072e-08	0.453137	0.28203	2.01674e-06	2.96736e-05
Arpc5	14.8221	3.90378e-07	0.311212	0.246	2.01674e-06	2.96736e-05
Atf4	19.7876	2.86623e-09	0.26545	0.288079	2.01674e-06	2.96736e-05
Atp2b4	19.4062	4.17874e-09	-0.0639561	-0.285761	2.01674e-06	2.96736e-05
Atp5g1	16.0773	1.12567e-07	0.320664	0.25832	2.01674e-06	2.96736e-05
Atp6ap1	13.347	1.6854e-06	0.249893	0.244105	2.01674e-06	2.96736e-05
Atp6ap2	17.2556	3.50593e-08	0.392597	0.273232	2.01674e-06	2.96736e-05
Atp6v1e1	14.1279	7.76919e-07	0.171142	0.225055	2.01674e-06	2.96736e-05
Atrnl1	14.4731	5.51754e-07	0.120397	0.23146	2.01674e-06	2.96736e-05
B4galnt1	16.0404	1.16763e-07	0.183577	0.266951	2.01674e-06	2.96736e-05
Bst2	18.9159	6.78452e-09	-0.221022	-0.289193	2.01674e-06	2.96736e-05
Cap1	13.6097	1.29889e-06	0.0805646	0.215929	2.01674e-06	2.96736e-05
Cbx1	15.7533	1.55165e-07	-0.18951	-0.264942	2.01674e-06	2.96736e-05
Ccl24	16.4477	7.8006e-08	-0.106595	-0.219725	2.01674e-06	2.96736e-05
Cct2	13.6262	1.2777e-06	-0.338162	-0.237239	2.01674e-06	2.96736e-05
Cd164	19.3175	4.56138e-09	0.271549	0.247295	2.01674e-06	2.96736e-05
Cd302	16.5248	7.22698e-08	0.106456	0.241454	2.01674e-06	2.96736e-05
Cdc26	18.0633	1.57648e-08	-0.169104	-0.280873	2.01674e-06	2.96736e-05
Cdca3	16.8737	5.11625e-08	0.217362	0.269655	2.01674e-06	2.96736e-05
Cdh1	18.3067	1.23927e-08	-0.105758	-0.242956	2.01674e-06	2.96736e-05
Cdkn2d	13.3866	1.62059e-06	0.153627	0.244452	2.01674e-06	2.96736e-05
Cdkn3	19.8361	2.73215e-09	0.153383	0.296529	2.01674e-06	2.96736e-05
Celsr3	15.0511	3.11136e-07	0.0421354	0.257171	2.01674e-06	2.96736e-05
Cfp	18.4524	1.07296e-08	0.206376	0.286222	2.01674e-06	2.96736e-05
Chd4	14.6968	4.42033e-07	-0.181313	-0.204759	2.01674e-06	2.96736e-05
Chpt1	14.2216	7.07989e-07	0.0780431	0.237769	2.01674e-06	2.96736e-05
Cib1	15.5886	1.82664e-07	0.166556	0.260866	2.01674e-06	2.96736e-05
Cited2	18.0994	1.52127e-08	-0.198523	-0.284204	2.01674e-06	2.96736e-05
Cks1b	17.8417	1.96308e-08	-0.324113	-0.282359	2.01674e-06	2.96736e-05
Clec10a	17.3143	3.30809e-08	-0.0728466	-0.258891	2.01674e-06	2.96736e-05
Clec4a3	18.1227	1.48663e-08	-0.0416358	-0.246169	2.01674e-06	2.96736e-05
Clec4n	14.9194	3.54518e-07	-0.120187	-0.237264	2.01674e-06	2.96736e-05
Clic4	17.993	1.6901e-08	-0.228103	-0.283074	2.01674e-06	2.96736e-05
Cnbp	18.5679	9.57089e-09	-0.23572	-0.286289	2.01674e-06	2.96736e-05
Cnn3	17.6699	2.32659e-08	-0.129472	-0.28088	2.01674e-06	2.96736e-05
Cox6a2	14.994	3.29223e-07	-0.0436892	-0.255385	2.01674e-06	2.96736e-05
Cox7a2	19.0905	5.70883e-09	0.207068	0.289822	2.01674e-06	2.96736e-05
Cox7b	14.5633	5.04543e-07	0.224106	0.247299	2.01674e-06	2.96736e-05
Cp	16.5853	6.80692e-08	-0.042464	-0.271814	2.01674e-06	2.96736e-05
Ctss	14.718	4.3281e-07	-0.196607	-0.245134	2.01674e-06	2.96736e-05
Cuta	16.1139	1.08566e-07	0.19236	0.265171	2.01674e-06	2.96736e-05
Cyb5b	18.3416	1.1972e-08	-0.258257	-0.274389	2.01674e-06	2.96736e-05
Dad1	14.1734	7.42664e-07	0.137851	0.200254	2.01674e-06	2.96736e-05
Dap	13.4356	1.54362e-06	0.170299	0.245337	2.01674e-06	2.96736e-05
Ddx21	18.2599	1.29795e-08	-0.208181	-0.262267	2.01674e-06	2.96736e-05
Dhrs7	14.6715	4.53233e-07	0.120091	0.247977	2.01674e-06	2.96736e-05
Dnmt3a	16.0626	1.14215e-07	-0.10499	-0.256999	2.01674e-06	2.96736e-05
Dock5	18.7788	7.76981e-09	0.0967659	0.235374	2.01674e-06	2.96736e-05
Dok3	13.7636	1.11502e-06	0.0666339	0.237001	2.01674e-06	2.96736e-05
Dpp9	17.9014	1.85041e-08	0.208499	0.281691	2.01674e-06	2.96736e-05
Dusp2	13.6627	1.23236e-06	-0.0401542	-0.247021	2.01674e-06	2.96736e-05
E2f2	14.9706	3.36954e-07	0.123714	0.2551	2.01674e-06	2.96736e-05
Ehbp1	14.9099	3.57851e-07	0.0584378	0.257518	2.01674e-06	2.96736e-05
Eif3h	20.0604	2.18912e-09	-0.557128	-0.29769	2.01674e-06	2.96736e-05
Elavl1	18.3486	1.18888e-08	-0.281687	-0.286304	2.01674e-06	2.96736e-05
Elk3	19.648	3.29036e-09	-0.160371	-0.294376	2.01674e-06	2.96736e-05
Emilin2	14.696	4.42343e-07	0.346801	0.249586	2.01674e-06	2.96736e-05
Ephb2	13.3335	1.7082e-06	-0.0374299	-0.24251	2.01674e-06	2.96736e-05
Epn1	15.3073	2.41368e-07	0.198703	0.244546	2.01674e-06	2.96736e-05
Esyt1	16.6611	6.31501e-08	0.271862	0.256142	2.01674e-06	2.96736e-05
Etv5	17.8459	1.95476e-08	-0.0659409	-0.282141	2.01674e-06	2.96736e-05
F11r	15.9739	1.2471e-07	0.140593	0.243944	2.01674e-06	2.96736e-05
F2rl2	16.3593	8.51431e-08	0.056363	0.212167	2.01674e-06	2.96736e-05
F630028O10Rik	16.0244	1.18625e-07	0.221623	0.258765	2.01674e-06	2.96736e-05
Fam136a	17.2423	3.55235e-08	-0.144283	-0.277236	2.01674e-06	2.96736e-05
Fam160a2	15.8838	1.36346e-07	0.0422528	0.251942	2.01674e-06	2.96736e-05
Fam212a	15.2542	2.54404e-07	-0.0521491	-0.26088	2.01674e-06	2.96736e-05
Fam216a	13.9946	8.86692e-07	-0.152579	-0.250002	2.01674e-06	2.96736e-05
Fam3c	14.079	8.15539e-07	-0.145331	-0.240762	2.01674e-06	2.96736e-05
Fam43a	17.1687	3.82078e-08	-0.057642	-0.268702	2.01674e-06	2.96736e-05
Fam49a	14.0676	8.2479e-07	-0.0572348	-0.237496	2.01674e-06	2.96736e-05
Fgd2	18.112	1.5024e-08	-0.0960312	-0.279409	2.01674e-06	2.96736e-05
Fkbp4	17.9562	1.75271e-08	-0.419998	-0.282884	2.01674e-06	2.96736e-05
Flt3	14.3366	6.31708e-07	-0.0383012	-0.25335	2.01674e-06	2.96736e-05
Fmnl2	17.0016	4.50792e-08	-0.0705077	-0.267934	2.01674e-06	2.96736e-05
Fpr2	15.3512	2.31097e-07	0.0780036	0.205368	2.01674e-06	2.96736e-05
Ftl1	18.137	1.46575e-08	0.284075	0.278421	2.01674e-06	2.96736e-05
Gart	18.0457	1.60428e-08	-0.180073	-0.28135	2.01674e-06	2.96736e-05
Gemin5	13.7588	1.12031e-06	-0.0525069	-0.241643	2.01674e-06	2.96736e-05
Gm43549	15.5179	1.95919e-07	0.305494	0.258938	2.01674e-06	2.96736e-05
Gng10	13.3805	1.63042e-06	-0.267153	-0.240804	2.01674e-06	2.96736e-05
Gpi1	16.6411	6.44108e-08	0.271516	0.217272	2.01674e-06	2.96736e-05
Gpsm1	13.9727	9.06173e-07	-0.0464709	-0.235569	2.01674e-06	2.96736e-05
Grn	16.9301	4.83829e-08	0.57387	0.230963	2.01674e-06	2.96736e-05
H2-DMb1	19.8749	2.62944e-09	-0.085349	-0.239672	2.01674e-06	2.96736e-05
Hck	19.3592	4.37741e-09	-0.124168	-0.291561	2.01674e-06	2.96736e-05
Hexa	16.0314	1.178e-07	0.165074	0.259061	2.01674e-06	2.96736e-05
Hipk1	13.6853	1.20501e-06	0.172926	0.24357	2.01674e-06	2.96736e-05
Hnrnpa0	18.3998	1.13021e-08	-0.423373	-0.277508	2.01674e-06	2.96736e-05
Hnrnpf	14.5825	4.95021e-07	-0.602944	-0.249474	2.01674e-06	2.96736e-05
Hnrnph1	19.4746	3.90547e-09	-0.475283	-0.292339	2.01674e-06	2.96736e-05
Hsd17b10	14.8671	3.73364e-07	-0.173079	-0.256688	2.01674e-06	2.96736e-05
Id1	13.9692	9.09326e-07	0.220158	0.232307	2.01674e-06	2.96736e-05
Id2	16.3504	8.58936e-08	0.105288	0.139409	2.01674e-06	2.96736e-05
Ift57	14.0708	8.22203e-07	-0.106388	-0.249693	2.01674e-06	2.96736e-05
Igfbp4	13.366	1.65397e-06	-0.39005	-0.244713	2.01674e-06	2.96736e-05
Il6st	17.1239	3.994e-08	-0.241767	-0.275984	2.01674e-06	2.96736e-05
Irs2	17.0456	4.31569e-08	0.0686892	0.260051	2.01674e-06	2.96736e-05
Isg20l2	17.1851	3.75899e-08	-0.18794	-0.275128	2.01674e-06	2.96736e-05
Kcnab2	18.8615	7.15931e-09	0.179751	0.279745	2.01674e-06	2.96736e-05
Kcnn4	14.1065	7.93604e-07	-0.0896936	-0.236882	2.01674e-06	2.96736e-05
Kctd20	16.8654	5.15838e-08	0.187283	0.257376	2.01674e-06	2.96736e-05
Lamtor4	15.3772	2.2522e-07	0.23455	0.261623	2.01674e-06	2.96736e-05
Lbp	19.6111	3.41237e-09	0.0716289	0.276873	2.01674e-06	2.96736e-05
Lbr	19.5058	3.78695e-09	0.34626	0.291131	2.01674e-06	2.96736e-05
Lgals3bp	16.4958	7.43776e-08	-0.318739	-0.264401	2.01674e-06	2.96736e-05
Lonp2	16.1678	1.02913e-07	0.107245	0.264677	2.01674e-06	2.96736e-05
Lpcat3	18.8463	7.26791e-09	0.243666	0.279485	2.01674e-06	2.96736e-05
Lpl	15.8789	1.3701e-07	1.00684	0.20582	2.01674e-06	2.96736e-05
Lrrc8c	16.7554	5.75186e-08	-0.108634	-0.264483	2.01674e-06	2.96736e-05
Lrrc8d	18.8709	7.09329e-09	0.112967	0.289333	2.01674e-06	2.96736e-05
Ly6i	19.6837	3.17611e-09	0.0628147	0.241373	2.01674e-06	2.96736e-05
Lyn	18.5794	9.46292e-09	0.320854	0.286264	2.01674e-06	2.96736e-05
Mapkapk2	14.9047	3.59704e-07	-0.364575	-0.258251	2.01674e-06	2.96736e-05
Mbtd1	15.1058	2.94704e-07	-0.106922	-0.244722	2.01674e-06	2.96736e-05
Megf9	14.6336	4.70568e-07	0.10953	0.254584	2.01674e-06	2.96736e-05
Mgam	14.2845	6.65174e-07	0.0357069	0.252252	2.01674e-06	2.96736e-05
Mllt6	14.6697	4.54065e-07	-0.0441246	-0.256097	2.01674e-06	2.96736e-05
Mpeg1	18.8759	7.05853e-09	0.237758	0.216782	2.01674e-06	2.96736e-05
Mt1	17.1797	3.77942e-08	0.351119	0.269001	2.01674e-06	2.96736e-05
Mta1	15.6693	1.68625e-07	-0.117392	-0.249008	2.01674e-06	2.96736e-05
Mtus1	15.1517	2.81617e-07	0.204891	0.253334	2.01674e-06	2.96736e-05
Mx1	15.9104	1.32799e-07	-0.0650046	-0.26441	2.01674e-06	2.96736e-05
Myh9	13.3888	1.61693e-06	0.12631	0.192929	2.01674e-06	2.96736e-05
Myl12a	14.608	4.82689e-07	0.395724	0.240693	2.01674e-06	2.96736e-05
Naip2	17.1855	3.75778e-08	0.100222	0.276849	2.01674e-06	2.96736e-05
Ndufb3	14.021	8.6377e-07	0.124827	0.250281	2.01674e-06	2.96736e-05
Nlrx1	19.5221	3.72635e-09	0.131217	0.286562	2.01674e-06	2.96736e-05
Nmd3	14.4548	5.6184e-07	-0.102808	-0.252366	2.01674e-06	2.96736e-05
Noc2l	19.138	5.44713e-09	-0.24935	-0.286971	2.01674e-06	2.96736e-05
Nono	17.247	3.53569e-08	-0.356878	-0.270706	2.01674e-06	2.96736e-05
Nop56	16.7707	5.66519e-08	-0.261241	-0.27303	2.01674e-06	2.96736e-05
Nrp2	15.7079	1.62292e-07	0.0895871	0.262488	2.01674e-06	2.96736e-05
Nrros	13.8318	1.04206e-06	-0.33236	-0.246011	2.01674e-06	2.96736e-05
Nsun2	14.2837	6.65677e-07	-0.173754	-0.252465	2.01674e-06	2.96736e-05
Nucb1	14.4517	5.6358e-07	0.164082	0.252557	2.01674e-06	2.96736e-05
Nudcd2	16.8754	5.10755e-08	-0.269538	-0.273768	2.01674e-06	2.96736e-05
Nudt21	15.1443	2.83669e-07	-0.219645	-0.257506	2.01674e-06	2.96736e-05
Nutf2-ps1	17.2583	3.49627e-08	-0.273603	-0.277619	2.01674e-06	2.96736e-05
P2ry13	18.3941	1.13661e-08	0.116291	0.263133	2.01674e-06	2.96736e-05
Pa2g4	13.7017	1.18556e-06	-0.241291	-0.195852	2.01674e-06	2.96736e-05
Pabpc4	19.7521	2.96861e-09	-0.191536	-0.296358	2.01674e-06	2.96736e-05
Paip2	13.3533	1.67496e-06	-0.123408	-0.243074	2.01674e-06	2.96736e-05
Pbx1	19.636	3.3295e-09	0.115034	0.238487	2.01674e-06	2.96736e-05
Pcbp1	14.4794	5.48314e-07	-0.558712	-0.254626	2.01674e-06	2.96736e-05
Pde8a	18.4806	1.04338e-08	0.106037	0.285573	2.01674e-06	2.96736e-05
Pf4	19.1014	5.64796e-09	0.237827	0.284766	2.01674e-06	2.96736e-05
Pilra	17.4678	2.84172e-08	0.127062	0.275952	2.01674e-06	2.96736e-05
Pip5k1b	19.6686	3.2239e-09	0.0413456	0.268797	2.01674e-06	2.96736e-05
Pirb	20.0557	2.19925e-09	0.186673	0.277239	2.01674e-06	2.96736e-05
Plac8	14.1592	7.53197e-07	-0.99337	-0.250616	2.01674e-06	2.96736e-05
Plod2	15.2376	2.58632e-07	-0.075024	-0.25788	2.01674e-06	2.96736e-05
Plxna1	14.4519	5.63487e-07	-0.0416126	-0.226992	2.01674e-06	2.96736e-05
Psma6	16.8844	5.06239e-08	0.150962	0.237234	2.01674e-06	2.96736e-05
Psmd8	14.3299	6.35917e-07	-0.204921	-0.223203	2.01674e-06	2.96736e-05
Ptbp3	15.2348	2.59339e-07	0.394434	0.256346	2.01674e-06	2.96736e-05
Ptk7	18.5863	9.39838e-09	-0.0619611	-0.285093	2.01674e-06	2.96736e-05
Rab24	17.8267	1.99235e-08	0.121361	0.278881	2.01674e-06	2.96736e-05
Ran	15.592	1.82039e-07	-0.846174	-0.260709	2.01674e-06	2.96736e-05
Ranbp1	15.3589	2.29332e-07	-0.24225	-0.256736	2.01674e-06	2.96736e-05
Rara	16.8656	5.15739e-08	0.104969	0.218229	2.01674e-06	2.96736e-05
Rnf150	13.5265	1.41054e-06	-0.0209006	-0.241902	2.01674e-06	2.96736e-05
Rpl18	14.1113	7.89797e-07	-0.570289	-0.249522	2.01674e-06	2.96736e-05
Rpl22	15.7865	1.50146e-07	-0.388376	-0.246543	2.01674e-06	2.96736e-05
Rpl24	18.7367	8.1e-09	-0.415629	-0.248183	2.01674e-06	2.96736e-05
Rpl39	13.6106	1.29769e-06	0.339984	0.225914	2.01674e-06	2.96736e-05
Rpl5	16.3063	8.97282e-08	-0.607732	-0.247166	2.01674e-06	2.96736e-05
Rpl6	16.6927	6.12007e-08	-0.298223	-0.267434	2.01674e-06	2.96736e-05
Rrad	16.4706	7.62526e-08	-0.0360982	-0.270304	2.01674e-06	2.96736e-05
Rras2	16.6487	6.39249e-08	-0.0557969	-0.271905	2.01674e-06	2.96736e-05
Rrs1	13.6197	1.28605e-06	-0.172298	-0.246896	2.01674e-06	2.96736e-05
Rtp4	13.3479	1.68397e-06	-0.0599695	-0.233469	2.01674e-06	2.96736e-05
Sdc3	15.2787	2.48304e-07	-0.0631173	-0.253622	2.01674e-06	2.96736e-05
Sdc4	16.9981	4.52328e-08	-0.0518841	-0.242718	2.01674e-06	2.96736e-05
Sema4a	15.5538	1.89074e-07	0.207257	0.26335	2.01674e-06	2.96736e-05
Serf2	17.8667	1.91506e-08	0.529462	0.282345	2.01674e-06	2.96736e-05
Slc39a10	14.4696	5.53654e-07	-0.150394	-0.24106	2.01674e-06	2.96736e-05
Smarce1	17.6053	2.48023e-08	-0.305498	-0.280307	2.01674e-06	2.96736e-05
Smdt1	14.2783	6.69262e-07	0.180831	0.252863	2.01674e-06	2.96736e-05
Snrnp70	15.4466	2.10252e-07	-0.344484	-0.255338	2.01674e-06	2.96736e-05
Sptssa	14.5478	5.1237e-07	-0.284265	-0.24486	2.01674e-06	2.96736e-05
Sqstm1	16.1516	1.04577e-07	-0.38069	-0.267662	2.01674e-06	2.96736e-05
Srgn	18.0892	1.53673e-08	1.30209	0.1523	2.01674e-06	2.96736e-05
Srrm2	13.3578	1.66748e-06	-0.206433	-0.241063	2.01674e-06	2.96736e-05
Srsf1	15.8073	1.47078e-07	-0.33909	-0.265843	2.01674e-06	2.96736e-05
St14	17.6237	2.43552e-08	0.0874876	0.261933	2.01674e-06	2.96736e-05
Stip1	17.6901	2.28061e-08	-0.260272	-0.281171	2.01674e-06	2.96736e-05
Stx3	16.7286	5.90641e-08	0.10695	0.270252	2.01674e-06	2.96736e-05
Sun2	14.2191	7.09764e-07	0.109419	0.20989	2.01674e-06	2.96736e-05
Tbc1d2	15.5629	1.87372e-07	0.0766425	0.255172	2.01674e-06	2.96736e-05
Tcf19	19.2963	4.65795e-09	0.133333	0.293519	2.01674e-06	2.96736e-05
Tcp1	14.3755	6.07817e-07	-0.25073	-0.192275	2.01674e-06	2.96736e-05
Tet2	17.5036	2.74294e-08	-0.140161	-0.275296	2.01674e-06	2.96736e-05
Tfec	16.5072	7.3538e-08	0.238855	0.266347	2.01674e-06	2.96736e-05
Tma7	19.8617	2.66394e-09	0.394417	0.297448	2.01674e-06	2.96736e-05
Tmed10	14.7569	4.1646e-07	0.38638	0.257034	2.01674e-06	2.96736e-05
Tmem14c	15.5332	1.92964e-07	0.365741	0.263017	2.01674e-06	2.96736e-05
Tmem40	18.7425	8.05373e-09	0.074402	0.270144	2.01674e-06	2.96736e-05
Tmx4	15.9538	1.27212e-07	0.116978	0.258494	2.01674e-06	2.96736e-05
Tnfrsf23	19.8935	2.58158e-09	0.114479	0.29779	2.01674e-06	2.96736e-05
Tnfrsf26	13.9573	9.2012e-07	0.0864182	0.239461	2.01674e-06	2.96736e-05
Tonsl	18.1747	1.41213e-08	0.25744	0.284682	2.01674e-06	2.96736e-05
Trim28	19.5319	3.69019e-09	-0.327664	-0.294768	2.01674e-06	2.96736e-05
Trim30a	17.9256	1.80665e-08	-0.317343	-0.263215	2.01674e-06	2.96736e-05
Trp53inp2	14.2496	6.88634e-07	0.0396944	0.207981	2.01674e-06	2.96736e-05
Tspan3	18.7644	7.88081e-09	-0.114221	-0.289453	2.01674e-06	2.96736e-05
Tspo	19.4589	3.9665e-09	0.275566	0.290852	2.01674e-06	2.96736e-05
Txn2	13.9142	9.60256e-07	-0.172367	-0.171705	2.01674e-06	2.96736e-05
Tyrobp	18.218	1.35291e-08	0.327387	0.271753	2.01674e-06	2.96736e-05
Ubap2l	13.7336	1.14868e-06	-0.194989	-0.246663	2.01674e-06	2.96736e-05
Ube2c	13.722	1.16189e-06	0.244199	0.237999	2.01674e-06	2.96736e-05
Ubtf	18.9887	6.3135e-09	-0.182474	-0.278005	2.01674e-06	2.96736e-05
Ugdh	18.997	6.26178e-09	0.218996	0.28819	2.01674e-06	2.96736e-05
Uqcrq	14.4736	5.5149e-07	0.199749	0.205375	2.01674e-06	2.96736e-05
Vrk1	16.9807	4.6021e-08	-0.171884	-0.268768	2.01674e-06	2.96736e-05
Vsir	14.0522	8.37454e-07	0.154976	0.248448	2.01674e-06	2.96736e-05
Wdr26	13.5177	1.42287e-06	-0.29937	-0.239029	2.01674e-06	2.96736e-05
Wfdc17	14.584	4.94299e-07	-0.307996	-0.251011	2.01674e-06	2.96736e-05
Ypel5	14.6697	4.54054e-07	0.101048	0.229034	2.01674e-06	2.96736e-05
Ywhag	19.5078	3.77936e-09	-0.441923	-0.263206	2.01674e-06	2.96736e-05
Zbtb42	14.8656	3.73922e-07	0.0339256	0.219314	2.01674e-06	2.96736e-05
Zc3h14	15.1685	2.76944e-07	-0.214279	-0.256152	2.01674e-06	2.96736e-05
Zc3h7b	16.9606	4.69432e-08	-0.0736992	-0.267679	2.01674e-06	2.96736e-05
Zeb2	18.706	8.3498e-09	-0.139704	-0.286623	2.01674e-06	2.96736e-05
Zfand5	14.9652	3.38774e-07	-0.243176	-0.2587	2.01674e-06	2.96736e-05
mt-Nd1	18.8942	6.93171e-09	-3.21204	-0.287756	2.01674e-06	2.96736e-05
mt-Nd4	19.8253	2.7616e-09	-2.51345	-0.27865	2.01674e-06	2.96736e-05
1700025G04Rik	12.3745	4.42418e-06	-0.11137	-0.235465	4.03348e-06	5.38358e-05
2810474O19Rik	12.2733	4.8916e-06	0.1514	0.178211	4.03348e-06	5.38358e-05
4930523C07Rik	13.2636	1.83088e-06	0.0530649	0.239243	4.03348e-06	5.38358e-05
AA467197	13.2646	1.82898e-06	0.0353279	0.133837	4.03348e-06	5.38358e-05
Ak4	13.267	1.82475e-06	-0.150423	-0.24299	4.03348e-06	5.38358e-05
Angptl2	12.7261	3.12071e-06	-0.0455119	-0.224147	4.03348e-06	5.38358e-05
Arhgap1	12.98	2.42565e-06	0.161152	0.239262	4.03348e-06	5.38358e-05
Arl6ip4	12.7413	3.07398e-06	-0.160012	-0.237538	4.03348e-06	5.38358e-05
Ass1	12.5134	3.85437e-06	-0.0467055	-0.212473	4.03348e-06	5.38358e-05
B3gnt5	13.1474	2.05453e-06	-0.0622668	-0.235838	4.03348e-06	5.38358e-05
Bnip3	12.4289	4.19152e-06	-0.302015	-0.235868	4.03348e-06	5.38358e-05
Bzrap1	13.2163	1.91874e-06	0.0469874	0.21974	4.03348e-06	5.38358e-05
C1rl	12.8542	2.74826e-06	0.0665444	0.211219	4.03348e-06	5.38358e-05
Cbx3	13.2054	1.93967e-06	-0.228031	-0.242136	4.03348e-06	5.38358e-05
Ccl6	12.9212	2.5716e-06	0.20518	0.206385	4.03348e-06	5.38358e-05
Ccr7	12.7695	2.98935e-06	-0.0265077	-0.237542	4.03348e-06	5.38358e-05
Cd177	12.6395	3.40071e-06	0.0251343	0.200743	4.03348e-06	5.38358e-05
Cd53	13.0641	2.2316e-06	0.275482	0.180429	4.03348e-06	5.38358e-05
Cd69	12.9214	2.5711e-06	-0.120326	-0.238543	4.03348e-06	5.38358e-05
Cisd1	12.6038	3.52353e-06	-0.200685	-0.23551	4.03348e-06	5.38358e-05
Clns1a	12.3969	4.32691e-06	-0.212521	-0.232599	4.03348e-06	5.38358e-05
Cul4a	12.6185	3.47266e-06	-0.164425	-0.232136	4.03348e-06	5.38358e-05
Ddhd1	12.5334	3.77856e-06	0.0992559	0.234694	4.03348e-06	5.38358e-05
Dnajb6	12.5455	3.73324e-06	-0.198237	-0.231961	4.03348e-06	5.38358e-05
Dnajc2	12.6388	3.40314e-06	-0.172076	-0.236546	4.03348e-06	5.38358e-05
E2f8	12.8813	2.67537e-06	0.15543	0.231219	4.03348e-06	5.38358e-05
Ethe1	12.708	3.1775e-06	0.120845	0.232542	4.03348e-06	5.38358e-05
Evi2b	12.227	5.12174e-06	0.308698	0.233879	4.03348e-06	5.38358e-05
Fam107b	12.3803	4.39881e-06	-0.218266	-0.211574	4.03348e-06	5.38358e-05
Fbxw4	12.238	5.06609e-06	-0.0805337	-0.223581	4.03348e-06	5.38358e-05
Fcor	12.3763	4.41627e-06	0.0763987	0.235423	4.03348e-06	5.38358e-05
Flot2	12.2904	4.80918e-06	0.0925384	0.233527	4.03348e-06	5.38358e-05
Gpr160	12.9396	2.52507e-06	0.0631925	0.23086	4.03348e-06	5.38358e-05
Gspt2	12.8539	2.74909e-06	0.0496313	0.235349	4.03348e-06	5.38358e-05
Hoxa9	12.2852	4.83405e-06	-0.0495889	-0.226297	4.03348e-06	5.38358e-05
Ilf3	12.5849	3.59017e-06	-0.0943566	-0.177811	4.03348e-06	5.38358e-05
Inhba	12.8668	2.71414e-06	0.0223266	0.237477	4.03348e-06	5.38358e-05
Kpnb1	13.1942	1.96129e-06	-0.32034	-0.191318	4.03348e-06	5.38358e-05
Morf4l1	12.4878	3.95346e-06	-0.317355	-0.233291	4.03348e-06	5.38358e-05
Morf4l2	12.8619	2.72742e-06	-0.252581	-0.210485	4.03348e-06	5.38358e-05
Mrps10	12.8779	2.6844e-06	-0.102891	-0.234217	4.03348e-06	5.38358e-05
Mt2	13.2017	1.94672e-06	0.0771427	0.168227	4.03348e-06	5.38358e-05
Naa50	13.011	2.35226e-06	-0.21443	-0.228722	4.03348e-06	5.38358e-05
Ncs1	12.6071	3.51204e-06	-0.0260033	-0.228046	4.03348e-06	5.38358e-05
Parvg	13.1428	2.06403e-06	0.187618	0.23392	4.03348e-06	5.38358e-05
Pde4b	12.7105	3.1695e-06	-0.0596295	-0.214341	4.03348e-06	5.38358e-05
Plscr3	13.3275	1.71837e-06	-0.105453	-0.240058	4.03348e-06	5.38358e-05
Pparg	12.5281	3.79844e-06	0.0847011	0.218336	4.03348e-06	5.38358e-05
Ppp2ca	12.3278	4.63394e-06	-0.330648	-0.231555	4.03348e-06	5.38358e-05
Prkcsh	12.5624	3.6713e-06	0.103973	0.235085	4.03348e-06	5.38358e-05
Prr13	12.6387	3.40342e-06	0.246669	0.209801	4.03348e-06	5.38358e-05
Rcc1	13.1778	1.99356e-06	-0.201044	-0.239466	4.03348e-06	5.38358e-05
Rpl14	12.8099	2.87176e-06	-0.318442	-0.207118	4.03348e-06	5.38358e-05
Rps2	12.8488	2.76295e-06	0.396258	0.239571	4.03348e-06	5.38358e-05
Rps6	13.175	1.99903e-06	0.523034	0.242982	4.03348e-06	5.38358e-05
Scin	12.7911	2.92573e-06	-0.0653278	-0.238579	4.03348e-06	5.38358e-05
Sec11c	13.0587	2.2436e-06	0.238177	0.239949	4.03348e-06	5.38358e-05
Sepw1	12.6053	3.51812e-06	-0.0616446	-0.231491	4.03348e-06	5.38358e-05
Sh3bp4	12.5706	3.64147e-06	-0.0363791	-0.224932	4.03348e-06	5.38358e-05
Slc25a24	12.6271	3.44292e-06	0.1578	0.236328	4.03348e-06	5.38358e-05
Slc45a4	12.4226	4.21766e-06	0.0704638	0.235775	4.03348e-06	5.38358e-05
Slc52a3	12.8511	2.75678e-06	0.0409055	0.214103	4.03348e-06	5.38358e-05
Sms	13.2312	1.89058e-06	-0.153795	-0.231712	4.03348e-06	5.38358e-05
Snrpb2	12.5181	3.83636e-06	-0.197014	-0.228792	4.03348e-06	5.38358e-05
Socs3	12.3813	4.39437e-06	-0.261867	-0.234328	4.03348e-06	5.38358e-05
Spag7	12.9024	2.61991e-06	-0.149664	-0.220574	4.03348e-06	5.38358e-05
Sqrdl	13.1083	2.13583e-06	0.0570696	0.234244	4.03348e-06	5.38358e-05
Vangl2	12.3576	4.4988e-06	-0.0241517	-0.219921	4.03348e-06	5.38358e-05
Yrdc	12.9092	2.60218e-06	-0.141625	-0.233651	4.03348e-06	5.38358e-05
2700099C18Rik	12.1676	5.43266e-06	0.0377241	0.122602	8.06696e-06	0.000107239
Dexi	12.1788	5.37243e-06	-0.0406516	-0.228417	8.06696e-06	0.000107239
Wdr55	12.1673	5.43406e-06	-0.129036	-0.232936	8.06696e-06	0.000107239
Agtrap	12.1295	5.64216e-06	0.0932213	0.227879	1.00837e-05	0.000129534
Cd38	11.9797	6.54685e-06	0.0222867	0.103957	1.00837e-05	0.000129534
Cd9	11.997	6.43502e-06	-0.222631	-0.231923	1.00837e-05	0.000129534
Chd1	12.0504	6.10271e-06	-0.115407	-0.210653	1.00837e-05	0.000129534
Cox8a	11.8676	7.31752e-06	0.422925	0.23067	1.00837e-05	0.000129534
Gclc	11.8796	7.23073e-06	-0.111563	-0.225152	1.00837e-05	0.000129534
Gria3	11.9463	6.76748e-06	-0.110722	-0.231008	1.00837e-05	0.000129534
Hdac5	11.9768	6.56578e-06	-0.128917	-0.221945	1.00837e-05	0.000129534
Hoxa5	11.9098	7.01751e-06	-0.050937	-0.230864	1.00837e-05	0.000129534
Ldlrad3	11.9805	6.54178e-06	0.0725583	0.230867	1.00837e-05	0.000129534
Mboat1	12.1411	5.57766e-06	0.0843513	0.232833	1.00837e-05	0.000129534
Msi2	11.9234	6.92301e-06	-0.0573488	-0.221946	1.00837e-05	0.000129534
Npm3	11.8857	7.18744e-06	-0.289882	-0.225084	1.00837e-05	0.000129534
Paox	12.0676	5.99942e-06	-0.0873995	-0.227966	1.00837e-05	0.000129534
Papss2	12.101	5.80383e-06	0.0624872	0.231392	1.00837e-05	0.000129534
Pou2f2	12.0054	6.38177e-06	-0.135138	-0.207201	1.00837e-05	0.000129534
Spop	11.9091	7.02231e-06	-0.184421	-0.230482	1.00837e-05	0.000129534
St3gal5	11.9987	6.42413e-06	-0.0529423	-0.231962	1.00837e-05	0.000129534
Stfa1	11.9383	6.82167e-06	0.0297775	0.205171	1.00837e-05	0.000129534
Tagln2	12.1207	5.6913e-06	0.325135	0.227188	1.00837e-05	0.000129534
Tmem180	11.8551	7.40912e-06	0.105037	0.224828	1.00837e-05	0.000129534
Tspan13	11.9514	6.73315e-06	-0.0384661	-0.229363	1.00837e-05	0.000129534
Uchl1	11.8501	7.44602e-06	-0.0292752	-0.230486	1.00837e-05	0.000129534
Vav2	12.0214	6.28138e-06	-0.0376917	-0.226995	1.00837e-05	0.000129534
Zfp36l2	11.8672	7.32048e-06	-0.162642	-0.228158	1.00837e-05	0.000129534
mt-Co2	12.1335	5.61971e-06	-4.35741	-0.229017	1.00837e-05	0.000129534
Fam117a	11.8148	7.71124e-06	-0.103559	-0.222562	1.21004e-05	0.000154639
Neto2	11.8242	7.63944e-06	0.0293648	0.217757	1.21004e-05	0.000154639
Slc35a1	11.8038	7.79625e-06	-0.0605786	-0.230064	1.21004e-05	0.000154639
Snx27	11.814	7.71748e-06	0.132657	0.22248	1.21004e-05	0.000154639
Ano10	11.7844	7.94769e-06	0.0429419	0.188777	1.41172e-05	0.00018018
Arpc4	11.7715	8.05041e-06	0.196265	0.220984	1.61339e-05	0.000203046
Cd209c	11.7105	8.55292e-06	0.0208968	0.191783	1.61339e-05	0.000203046
Cd48	11.7439	8.27393e-06	-0.154803	-0.226341	1.61339e-05	0.000203046
Cdc25b	11.5999	9.54544e-06	0.0649958	0.212663	1.61339e-05	0.000203046
Lmo1	11.7732	8.03683e-06	-0.0478984	-0.229778	1.61339e-05	0.000203046
Myl12b	11.6612	8.98191e-06	0.248412	0.221925	1.61339e-05	0.000203046
Padi4	11.6712	8.8935e-06	0.0421377	0.22641	1.61339e-05	0.000203046
Rnf4	11.7488	8.23374e-06	-0.163195	-0.226309	1.61339e-05	0.000203046
Slc16a3	11.6133	9.41921e-06	0.10444	0.216854	1.61339e-05	0.000203046
Slc16a6	11.7405	8.30159e-06	0.14048	0.223444	1.61339e-05	0.000203046
Svep1	11.7486	8.23534e-06	0.0432807	0.209127	1.61339e-05	0.000203046
Aprt	11.5672	9.86087e-06	0.196088	0.224989	1.81507e-05	0.000228137
Cd84	11.4687	1.08739e-05	0.0951766	0.220462	2.01674e-05	0.000251889
Hmgb3	11.4806	1.07458e-05	0.111804	0.226472	2.01674e-05	0.000251889
Hnmt	11.4534	1.10409e-05	0.0197521	0.226418	2.01674e-05	0.000251889
Lpxn	11.4895	1.06512e-05	-0.0925967	-0.226264	2.01674e-05	0.000251889
S100a10	11.5498	1.00322e-05	0.233325	0.216412	2.01674e-05	0.000251889
Arl6ip1	11.3689	1.20071e-05	0.375359	0.186584	2.21841e-05	0.000275
Fam111a	11.371	1.19823e-05	0.270742	0.204775	2.21841e-05	0.000275
Kat2a	11.4391	1.11984e-05	-0.0861056	-0.221138	2.21841e-05	0.000275
Map4k1	11.3548	1.21757e-05	0.0969079	0.225331	2.21841e-05	0.000275
Mlx	11.4232	1.1377e-05	0.0961691	0.179099	2.21841e-05	0.000275
Mrpl51	11.3977	1.16679e-05	0.149407	0.216153	2.21841e-05	0.000275
Anxa11	11.1177	1.54097e-05	0.0924874	0.222985	2.62176e-05	0.0003125
Arl11	11.1316	1.51976e-05	0.118147	0.222982	2.62176e-05	0.0003125
Asf1b	11.3133	1.26885e-05	0.204527	0.225264	2.62176e-05	0.0003125
Aurkaip1	11.2281	1.38096e-05	0.132339	0.224415	2.62176e-05	0.0003125
Cenpb	11.0964	1.57392e-05	0.172933	0.217592	2.62176e-05	0.0003125
Csnk1a1	11.2303	1.37789e-05	-0.177773	-0.216091	2.62176e-05	0.0003125
Eif4a1	11.0909	1.58249e-05	-0.281041	-0.211585	2.62176e-05	0.0003125
Ewsr1	11.2896	1.29913e-05	-0.171643	-0.198575	2.62176e-05	0.0003125
Irgm1	11.2925	1.29538e-05	-0.146766	-0.222153	2.62176e-05	0.0003125
Itgb2l	11.2758	1.31699e-05	0.0183916	0.147236	2.62176e-05	0.0003125
Lmna	11.14	1.50715e-05	-0.0897155	-0.221281	2.62176e-05	0.0003125
Mcm2	11.1656	1.4693e-05	-0.22198	-0.223439	2.62176e-05	0.0003125
Mcm7	11.2226	1.38846e-05	-0.2566	-0.191385	2.62176e-05	0.0003125
Pafah2	11.2424	1.36145e-05	0.0738701	0.221649	2.62176e-05	0.0003125
Pbxip1	11.0557	1.63879e-05	0.139998	0.2145	2.62176e-05	0.0003125
Pfdn2	11.2247	1.38563e-05	-0.179276	-0.224328	2.62176e-05	0.0003125
Prmt5	11.1727	1.45899e-05	-0.109348	-0.219611	2.62176e-05	0.0003125
Ptma	11.274	1.3193e-05	-1.21907	-0.223631	2.62176e-05	0.0003125
Ptp4a3	11.0661	1.62201e-05	-0.112774	-0.206975	2.62176e-05	0.0003125
Ptpra	11.1483	1.49483e-05	-0.101526	-0.217039	2.62176e-05	0.0003125
Rab1a	11.2692	1.3257e-05	0.256296	0.223041	2.62176e-05	0.0003125
Rad23b	11.2649	1.33131e-05	-0.132483	-0.209487	2.62176e-05	0.0003125
Rangrf	11.2097	1.40635e-05	-0.0745118	-0.223656	2.62176e-05	0.0003125
Rpia	11.1726	1.45924e-05	0.184733	0.217904	2.62176e-05	0.0003125
Slc16a1	11.2417	1.36232e-05	-0.196272	-0.221058	2.62176e-05	0.0003125
Snap47	11.2581	1.34039e-05	-0.0481496	-0.224295	2.62176e-05	0.0003125
Supt16	11.1913	1.43226e-05	-0.115975	-0.224076	2.62176e-05	0.0003125
Tnfrsf13b	11.1356	1.51382e-05	0.140518	0.183352	2.62176e-05	0.0003125
Tns1	11.0525	1.64399e-05	-0.0283169	-0.221256	2.62176e-05	0.0003125
Tspan4	11.3198	1.26074e-05	-0.0850055	-0.22419	2.62176e-05	0.0003125
Tubb5	11.176	1.45425e-05	-0.416662	-0.125968	2.62176e-05	0.0003125
Ywhab	11.1505	1.49162e-05	0.343884	0.223521	2.62176e-05	0.0003125
Actr3	11.0032	1.72664e-05	0.507359	0.221934	2.82343e-05	0.000336134
Ppp1r18	10.9765	1.77292e-05	0.172385	0.213765	3.02511e-05	0.000359281
Rab5c	10.982	1.76338e-05	0.25983	0.201773	3.02511e-05	0.000359281
Cdk2ap2	10.878	1.95518e-05	0.158288	0.200063	3.22678e-05	0.000378698
Eny2	10.8644	1.98186e-05	-0.155307	-0.218734	3.22678e-05	0.000378698
Ica1	10.855	2.00049e-05	0.0318124	0.216093	3.22678e-05	0.000378698
Isg15	10.9065	1.90075e-05	-0.119205	-0.214501	3.22678e-05	0.000378698
Kcnj2	10.867	1.97673e-05	0.0859904	0.220607	3.22678e-05	0.000378698
Mycbp2	10.93	1.85687e-05	-0.164515	-0.214062	3.22678e-05	0.000378698
Plgrkt	10.9228	1.87022e-05	0.0911965	0.188936	3.22678e-05	0.000378698
Rcc2	10.831	2.04872e-05	-0.164271	-0.217969	3.22678e-05	0.000378698
Rpl7	10.8894	1.93332e-05	-0.657488	-0.214281	3.22678e-05	0.000378698
Scp2	10.8778	1.95568e-05	0.175121	0.183453	3.22678e-05	0.000378698
Atp6v1b2	10.7868	2.1407e-05	0.204197	0.21998	3.42846e-05	0.00039953
Gadd45b	10.7568	2.20551e-05	0.0511408	0.142793	3.42846e-05	0.00039953
Hsp90ab1	10.7866	2.14106e-05	0.0272312	0.0106529	3.42846e-05	0.00039953
Rps23	10.792	2.12973e-05	-1.12421	-0.208779	3.42846e-05	0.00039953
Txndc17	10.8012	2.11037e-05	-0.179936	-0.218576	3.42846e-05	0.00039953
Uqcrb	10.7674	2.18227e-05	0.187231	0.215762	3.42846e-05	0.00039953
Fam133b	10.717	2.29451e-05	-0.0637537	-0.214934	3.8318e-05	0.000445487
Gcnt1	10.7417	2.23869e-05	-0.122164	-0.219414	3.8318e-05	0.000445487
Atp6v0e	10.6218	2.52213e-05	0.203762	0.198366	4.23515e-05	0.000486111
Cebpe	10.6451	2.46436e-05	0.0308599	0.20604	4.23515e-05	0.000486111
Cyp4f16	10.68	2.38041e-05	-0.113967	-0.1855	4.23515e-05	0.000486111
Dctd	10.5956	2.58857e-05	-0.0543866	-0.214397	4.23515e-05	0.000486111
Ifi27l2a	10.6312	2.49848e-05	-0.094633	-0.215662	4.23515e-05	0.000486111
Nfkb2	10.5817	2.62443e-05	-0.0814429	-0.19976	4.23515e-05	0.000486111
Ngp	10.6842	2.37048e-05	0.527743	0.192457	4.23515e-05	0.000486111
Pik3ip1	10.6189	2.52928e-05	-0.0599221	-0.212363	4.23515e-05	0.000486111
Samd10	10.6106	2.55038e-05	0.0511052	0.218213	4.23515e-05	0.000486111
Shtn1	10.5512	2.70534e-05	0.0997175	0.217577	4.23515e-05	0.000486111
Trp53	10.5938	2.5931e-05	-0.135706	-0.20715	4.23515e-05	0.000486111
Acyp1	10.521	2.78771e-05	0.0723002	0.214015	4.43683e-05	0.000507497
Hnrnpab	10.5262	2.77328e-05	-0.414377	-0.208859	4.43683e-05	0.000507497
Tceal8	10.5184	2.79488e-05	0.0949329	0.213834	4.43683e-05	0.000507497
Helz2	10.4985	2.85073e-05	-0.0662856	-0.210222	4.84017e-05	0.000552995
Aes	10.3828	3.19818e-05	0.13917	0.162212	5.04185e-05	0.000568182
Ap1s2	10.4173	3.09034e-05	0.0826457	0.215058	5.04185e-05	0.000568182
Cd37	10.4407	3.01934e-05	0.0814219	0.163881	5.04185e-05	0.000568182
Dclre1a	10.3617	3.26595e-05	0.0481788	0.185827	5.04185e-05	0.000568182
Gstm4	10.3484	3.30925e-05	0.0507292	0.214479	5.04185e-05	0.000568182
Gtpbp4	10.441	3.01854e-05	-0.0936644	-0.208457	5.04185e-05	0.000568182
Mfsd14b	10.4232	3.07215e-05	0.108029	0.202084	5.04185e-05	0.000568182
Rab3d	10.3847	3.19195e-05	0.0754948	0.204259	5.04185e-05	0.000568182
Rbpms	10.3557	3.28539e-05	0.05169	0.213716	5.04185e-05	0.000568182
Shfm1	10.4569	2.971e-05	0.259042	0.216578	5.04185e-05	0.000568182
Tcf3	10.3638	3.25918e-05	-0.0956264	-0.211605	5.04185e-05	0.000568182
Tubb2a	10.4384	3.0261e-05	-0.0499617	-0.190592	5.04185e-05	0.000568182
Eva1b	10.3355	3.35205e-05	-0.0430866	-0.214548	5.24352e-05	0.000587571
Gdap10	10.3297	3.37148e-05	-0.055958	-0.200931	5.24352e-05	0.000587571
Gramd4	10.3405	3.33534e-05	-0.0776187	-0.214518	5.24352e-05	0.000587571
Pdlim2	10.2985	3.47752e-05	0.099237	0.204346	5.24352e-05	0.000587571
Tmem135	10.3391	3.33996e-05	0.0891262	0.215377	5.24352e-05	0.000587571
Cdv3	10.2577	3.62152e-05	-0.136349	-0.205743	5.4452e-05	0.000607424
Sec61g	10.2717	3.57145e-05	0.247214	0.192847	5.4452e-05	0.000607424
Ttc39a	10.2826	3.53307e-05	0.0231224	0.201242	5.4452e-05	0.000607424
Ttc39c	10.2641	3.5987e-05	0.0305416	0.199181	5.4452e-05	0.000607424
Rps27rt	10.2496	3.65072e-05	0.214598	0.213643	5.64687e-05	0.000628507
Runx1	10.231	3.71888e-05	-0.167581	-0.208234	5.64687e-05	0.000628507
Aplp2	10.207	3.80858e-05	0.0812257	0.207006	5.84854e-05	0.00064877
Itga6	10.1992	3.83809e-05	-0.122852	-0.21379	5.84854e-05	0.00064877
U2af1	10.2061	3.81189e-05	-0.204679	-0.196731	5.84854e-05	0.00064877
Arhgdib	10.1187	4.15791e-05	0.232139	0.196375	6.05022e-05	0.000663717
Atg3	10.1429	4.05902e-05	0.162828	0.207691	6.05022e-05	0.000663717
Cic	10.1242	4.13546e-05	0.117463	0.212846	6.05022e-05	0.000663717
Ddx5	10.1192	4.15585e-05	-0.326261	-0.19508	6.05022e-05	0.000663717
Gpcpd1	10.1763	3.92651e-05	0.044117	0.133833	6.05022e-05	0.000663717
Hmgcs1	10.1117	4.18701e-05	-0.219467	-0.213049	6.05022e-05	0.000663717
Polr2a	10.1759	3.92817e-05	-0.138146	-0.213674	6.05022e-05	0.000663717
Rps18	10.0861	4.29492e-05	0.197901	0.198285	6.05022e-05	0.000663717
Slc28a2	10.177	3.92385e-05	0.0294736	0.190589	6.05022e-05	0.000663717
Stmn1	10.1346	4.09281e-05	-0.384768	-0.205167	6.05022e-05	0.000663717
Tuba1b	10.0664	4.38001e-05	0.960194	0.122232	6.25189e-05	0.000685083
Zbtb7b	10.0532	4.43766e-05	0.0531666	0.212016	6.45356e-05	0.000706402
Cnn2	10.0256	4.56096e-05	0.106779	0.202114	6.65524e-05	0.000722892
F9	9.99755	4.69007e-05	0.0147248	0.150676	6.65524e-05	0.000722892
Kcnk6	9.96598	4.83959e-05	0.0944815	0.210974	6.65524e-05	0.000722892
Nob1	10.0052	4.65461e-05	-0.124637	-0.211935	6.65524e-05	0.000722892
Prss16	10.0455	4.47175e-05	0.0741609	0.201426	6.65524e-05	0.000722892
Sipa1l2	10.012	4.62307e-05	0.0307731	0.190147	6.65524e-05	0.000722892
Slc12a6	10.0008	4.67484e-05	0.0790475	0.211585	6.65524e-05	0.000722892
1810011H11Rik	9.93894	4.97146e-05	0.0291751	0.210569	6.85691e-05	0.000738328
Acsl1	9.94659	4.93377e-05	0.0874773	0.189441	6.85691e-05	0.000738328
Cpsf6	9.95757	4.88023e-05	-0.143246	-0.210854	6.85691e-05	0.000738328
Hypk	9.92801	5.02577e-05	-0.154379	-0.209373	6.85691e-05	0.000738328
Rnf144b	9.94562	4.93852e-05	0.0168488	0.202751	6.85691e-05	0.000738328
Trim13	9.92557	5.03796e-05	0.10133	0.210121	6.85691e-05	0.000738328
Uba1	9.91345	5.09901e-05	0.245252	0.21021	6.85691e-05	0.000738328
Usp5	9.93215	5.00512e-05	0.13746	0.202384	6.85691e-05	0.000738328
Oasl2	9.89379	5.19967e-05	-0.0735966	-0.194575	7.05859e-05	0.000757576
Rasgrp2	9.88984	5.2201e-05	0.0779883	0.208486	7.05859e-05	0.000757576
Tmem201	9.88836	5.22779e-05	-0.045816	-0.209369	7.05859e-05	0.000757576
Mafg	9.86754	5.3371e-05	0.182271	0.206478	7.26026e-05	0.000777538
Pura	9.85453	5.40657e-05	-0.112937	-0.186008	7.26026e-05	0.000777538
Dynll1	9.81404	5.62863e-05	-0.400067	-0.199424	7.46193e-05	0.000795699
Fam53c	9.81427	5.62737e-05	-0.0840041	-0.204336	7.46193e-05	0.000795699
Ubash3b	9.82276	5.58009e-05	0.092813	0.18694	7.46193e-05	0.000795699
Vim	9.80764	5.66459e-05	0.62193	0.197836	7.46193e-05	0.000795699
Milr1	9.79976	5.70914e-05	0.192132	0.200666	7.86528e-05	0.00083691
Psd3	9.79218	5.75228e-05	-0.0201699	-0.190389	7.86528e-05	0.00083691
Fubp1	9.77664	5.84184e-05	-0.15894	-0.193208	8.06696e-05	0.000856531
Gapvd1	9.76883	5.8874e-05	-0.113573	-0.17941	8.06696e-05	0.000856531
Emc6	9.73723	6.07531e-05	-0.115884	-0.153302	8.4703e-05	0.000896478
Pknox1	9.755	5.9689e-05	-0.067764	-0.204183	8.4703e-05	0.000896478
Scand1	9.72104	6.17387e-05	0.0611027	0.180014	8.4703e-05	0.000896478
Gpsm2	9.70494	6.27347e-05	0.0420492	0.208693	8.87365e-05	0.000937167
Sp140	9.70653	6.26356e-05	0.0791521	0.169791	8.87365e-05	0.000937167
Irf9	9.68628	6.39092e-05	-0.131993	-0.200306	9.277e-05	0.000976645
Itgb5	9.67803	6.44357e-05	-0.0489369	-0.180442	9.277e-05	0.000976645
Wdr82	9.69325	6.34681e-05	-0.136049	-0.194338	9.277e-05	0.000976645
5730508B09Rik	9.63095	6.75233e-05	0.0807462	0.180201	9.47867e-05	0.000992608
Bola3	9.64023	6.69034e-05	-0.112719	-0.204935	9.47867e-05	0.000992608
Gm37214	9.63061	6.75465e-05	0.076586	0.0602344	9.47867e-05	0.000992608
Mrpl3	9.64151	6.68183e-05	-0.171863	-0.202633	9.47867e-05	0.000992608
Snx3	9.67562	6.45902e-05	0.301287	0.195188	9.47867e-05	0.000992608
Mapk7	9.61805	6.83953e-05	0.0554406	0.206268	9.88202e-05	0.00103376
Lair1	9.61195	6.88109e-05	0.09915	0.190709	0.000100837	0.00105374
Ctsz	9.57914	7.10928e-05	0.205488	0.206698	0.000102854	0.00107256
Cyc1	9.58687	7.05485e-05	0.126591	0.121736	0.000102854	0.00107256
Asns	9.56804	7.18817e-05	0.0452035	0.163615	0.00010487	0.00108333
Brd3	9.52171	7.52702e-05	-0.0914673	-0.20674	0.00010487	0.00108333
Cct4	9.52195	7.52521e-05	-0.178693	-0.197751	0.00010487	0.00108333
Chsy1	9.5544	7.28635e-05	-0.151807	-0.19298	0.00010487	0.00108333
Gpr141	9.54729	7.33803e-05	0.0930645	0.200357	0.00010487	0.00108333
Man2a1	9.53601	7.42077e-05	0.17346	0.184855	0.00010487	0.00108333
Mif	9.5347	7.43048e-05	-0.238017	-0.174597	0.00010487	0.00108333
Sirt3	9.51707	7.56182e-05	-0.0655824	-0.206247	0.00010487	0.00108333
Tcea1	9.51228	7.59796e-05	-0.175197	-0.202235	0.00010487	0.00108333
Abtb1	9.4845	7.8107e-05	0.0418146	0.172767	0.000106887	0.00110187
Snx2	9.48626	7.79704e-05	0.235027	0.182123	0.000106887	0.00110187
Galns	9.45984	8.00466e-05	0.0722256	0.200773	0.000110921	0.00113636
Phtf2	9.44032	8.16153e-05	-0.057833	-0.193719	0.000110921	0.00113636
Ppm1h	9.443	8.13979e-05	0.0681066	0.205143	0.000110921	0.00113636
Slc27a4	9.45104	8.075e-05	0.0239104	0.164963	0.000110921	0.00113636
Srrm1	9.43949	8.1682e-05	-0.148083	-0.203398	0.000110921	0.00113636
Txn1	9.45873	8.01343e-05	0.363941	0.192841	0.000110921	0.00113636
R3hdm1	9.43375	8.21499e-05	-0.116001	-0.195882	0.000112937	0.00115583
Ciapin1	9.41459	8.37304e-05	-0.129818	-0.196549	0.000114954	0.00117405
Usp22	9.42133	8.31711e-05	-0.116291	-0.201845	0.000114954	0.00117405
Klf4	9.41057	8.40656e-05	0.16784	0.204572	0.000116971	0.00119219
Rinl	9.41092	8.4036e-05	0.0445989	0.12499	0.000116971	0.00119219
Entpd3	9.3551	8.88321e-05	0.0516031	0.177058	0.000118988	0.00120902
Ide	9.38726	8.60368e-05	-0.122972	-0.188116	0.000118988	0.00120902
Med7	9.36942	8.75768e-05	-0.0524565	-0.15166	0.000118988	0.00120902
Actr2	9.3263	9.14135e-05	0.175403	0.193419	0.000121004	0.00122574
Nup93	9.32674	9.13734e-05	-0.121496	-0.20467	0.000121004	0.00122574
Spp1	9.33357	9.07551e-05	-0.177915	-0.0447391	0.000121004	0.00122574
Brd9	9.3143	9.2511e-05	0.0589913	0.198669	0.000125038	0.00126402
Reep5	9.30813	9.30798e-05	0.184092	0.202448	0.000125038	0.00126402
Gm37065	9.28209	9.55221e-05	-0.0921855	-0.180379	0.000129071	0.00129949
Myb	9.28901	9.48661e-05	-0.0707751	-0.204251	0.000129071	0.00129949
Ppp1ca	9.27458	9.62372e-05	0.15163	0.190238	0.000129071	0.00129949
Raf1	9.28258	9.54749e-05	0.0947821	0.178173	0.000129071	0.00129949
Cbx2	9.26162	9.74861e-05	-0.0255585	-0.197209	0.000131088	0.00131181
Cd47	9.25366	9.82611e-05	-0.384119	-0.131243	0.000131088	0.00131181
Hint1	9.26543	9.71175e-05	-0.118755	-0.0598194	0.000131088	0.00131181
Igtp	9.26781	9.68878e-05	-0.0647871	-0.160757	0.000131088	0.00131181
March5	9.25234	9.83902e-05	-0.108697	-0.202297	0.000131088	0.00131181
Meis1	9.27169	9.65151e-05	-0.0552966	-0.203103	0.000131088	0.00131181
Tmed4	9.23158	0.000100442	-0.0895069	-0.176784	0.000135122	0.00135081
Cd93	9.22202	0.000101401	0.150852	0.191578	0.000137138	0.00136273
Hfe	9.21093	0.000102526	0.0537616	0.193634	0.000137138	0.00136273
Nupr1	9.22474	0.000101127	0.065244	0.177679	0.000137138	0.00136273
Pebp1	9.21459	0.000102154	-0.201408	-0.193582	0.000137138	0.00136273
Praf2	9.2242	0.000101182	0.0565725	0.192646	0.000137138	0.00136273
Prelid1	9.2209	0.000101515	0.311259	0.195036	0.000137138	0.00136273
Ddx39b	9.20553	0.000103078	-0.211811	-0.203247	0.000139155	0.00137725
Elp2	9.18917	0.000104769	-0.144923	-0.202588	0.000139155	0.00137725
Ralgds	9.20118	0.000103525	-0.0597972	-0.199915	0.000139155	0.00137725
Slc35c2	9.20464	0.000103169	0.206434	0.199474	0.000139155	0.00137725
Hibadh	9.18229	0.000105488	-0.0542015	-0.0777094	0.000141172	0.00139442
Rhoq	9.18216	0.000105502	-0.178753	-0.203085	0.000141172	0.00139442
Pigh	9.17189	0.000106585	-0.0370655	-0.189241	0.000143188	0.00141294
Cmtm7	9.15961	0.000107894	0.0222642	0.0242342	0.000145205	0.00142857
Mpp6	9.16348	0.00010748	-0.0983756	-0.199883	0.000145205	0.00142857
Stim1	9.15539	0.000108348	0.0771807	0.189134	0.000145205	0.00142857
Akap1	9.11851	0.000112395	-0.0505806	-0.201454	0.000149239	0.00146245
Psma2	9.11286	0.00011303	0.104644	0.195085	0.000149239	0.00146245
Rnaset2b	9.12762	0.000111382	0.141946	0.202088	0.000149239	0.00146245
Rps27a	9.11265	0.000113053	-0.73533	-0.201904	0.000149239	0.00146245
Mrpl32	9.09444	0.00011512	0.0624836	0.160264	0.000151255	0.00147493
Msmo1	9.07443	0.000117433	-0.259169	-0.200781	0.000151255	0.00147493
Prps1	9.10049	0.000114429	-0.119158	-0.20174	0.000151255	0.00147493
Selplg	9.08276	0.000116464	0.218486	0.20081	0.000151255	0.00147493
Zfx	9.09835	0.000114672	-0.108131	-0.201848	0.000151255	0.00147493
B430306N03Rik	9.07062	0.000117878	0.0367322	0.178124	0.000153272	0.00148728
Cnr2	9.06234	0.000118853	0.0637547	0.169647	0.000153272	0.00148728
Fgd6	9.06752	0.000118243	0.0295584	0.201774	0.000153272	0.00148728
Fgl2	9.05711	0.000119473	0.106842	0.188063	0.000153272	0.00148728
Grpel1	9.06107	0.000119004	0.0865101	0.199326	0.000153272	0.00148728
Bnip3l	9.03758	0.000121817	0.0516876	0.0375429	0.000155289	0.0014966
Dnaja1	8.99618	0.000126938	-0.1443	-0.199847	0.000155289	0.0014966
Ift80	8.99832	0.000126667	0.0602869	0.183093	0.000155289	0.0014966
Steap4	9.00218	0.000126182	0.0382588	0.194688	0.000155289	0.0014966
Stx11	9.0377	0.000121802	0.0610541	0.198481	0.000155289	0.0014966
Triobp	9.00438	0.000125906	0.103966	0.197176	0.000155289	0.0014966
Tuba8	9.04119	0.00012138	0.0325017	0.191488	0.000155289	0.0014966
Cox6b1	8.98651	0.000128164	0.220939	0.192699	0.000157306	0.00151309
Tbc1d2b	8.99033	0.000127677	0.0761646	0.195451	0.000157306	0.00151309
Add3	8.9679	0.000130558	0.0941632	0.188839	0.000159322	0.00152657
Foxred2	8.96734	0.000130631	-0.0424481	-0.196619	0.000159322	0.00152657
Man1c1	8.97549	0.000129577	0.0969139	0.194375	0.000159322	0.00152657
Zfp263	8.9677	0.000130584	-0.0654633	-0.182248	0.000159322	0.00152657
Flt1	8.95504	0.00013224	0.0493147	0.165028	0.000161339	0.00154143
Polr1b	8.95116	0.000132751	-0.0337638	-0.200245	0.000161339	0.00154143
Tpra1	8.95829	0.000131812	-0.0606005	-0.188959	0.000161339	0.00154143
Atxn7	8.92043	0.00013687	-0.0871586	-0.193871	0.000167389	0.00159462
Lrrc42	8.91881	0.000137091	-0.0613583	-0.193966	0.000167389	0.00159462
Prmt1	8.92186	0.000136677	-0.102466	-0.191642	0.000167389	0.00159462
Mrpl41	8.90055	0.000139603	0.0637682	0.162955	0.000177473	0.00168421
Muc13	8.90013	0.000139662	-0.0797743	-0.167882	0.000177473	0.00168421
Rsl1d1	8.9023	0.000139362	-0.110666	-0.18775	0.000177473	0.00168421
Snhg1	8.90674	0.000138747	-0.165245	-0.190084	0.000177473	0.00168421
Hnrnpm	8.89604	0.000140231	-0.248901	-0.177628	0.00017949	0.00169685
Itga1	8.88673	0.000141535	0.0571696	0.166188	0.00017949	0.00169685
Rap1b	8.89273	0.000140694	0.234053	0.196846	0.00017949	0.00169685
Tlcd2	8.89466	0.000140424	0.0431087	0.197091	0.00017949	0.00169685
Fbxl20	8.87793	0.00014278	-0.0523574	-0.19572	0.000181507	0.00171265
Pdpk1	8.87866	0.000142677	0.11829	0.174811	0.000181507	0.00171265
Gm16096	8.86956	0.000143974	0.019806	0.170272	0.00018554	0.00174573
Mtr	8.87008	0.0001439	-0.0468089	-0.146903	0.00018554	0.00174573
Rplp1	8.86989	0.000143926	0.198082	0.187312	0.00018554	0.00174573
Zc3h15	8.86816	0.000144175	-0.126504	-0.195858	0.000187557	0.00176303
Wbp2	8.86466	0.000144678	0.182818	0.190065	0.000189573	0.0017803
Sh3pxd2b	8.85702	0.00014578	-0.088571	-0.193467	0.00019159	0.00179754
Ndst1	8.83817	0.00014854	-0.0653082	-0.198805	0.000199657	0.00186616
Pgm1	8.84676	0.000147276	0.0813863	0.187844	0.000199657	0.00186616
Prkcb	8.84558	0.000147449	0.0343718	0.182713	0.000199657	0.00186616
Svip	8.83943	0.000148355	0.06483	0.19207	0.000199657	0.00186616
Edem2	8.83777	0.000148599	0.114785	0.198031	0.000201674	0.00188324
Cast	8.82239	0.00015089	0.0976385	0.193437	0.000203691	0.00189493
Mov10	8.82047	0.000151178	-0.0441661	-0.191023	0.000203691	0.00189493
Sf1	8.82192	0.000150961	-0.228107	-0.181562	0.000203691	0.00189493
Slc20a1	8.83291	0.00014932	0.0533993	0.109213	0.000203691	0.00189493
Mboat2	8.81609	0.000151838	-0.0238641	-0.18752	0.000205707	0.0019119
Cyfip2	8.79192	0.000155533	-0.103857	-0.196855	0.000207724	0.00192523
Rai1	8.77834	0.000157649	-0.062223	-0.198554	0.000207724	0.00192523
Xdh	8.79189	0.000155539	0.0437412	0.187458	0.000207724	0.00192523
Abcb1b	8.76466	0.000159809	-0.0725355	-0.193669	0.000209741	0.00193488
Acadl	8.77522	0.000158138	0.119569	0.120442	0.000209741	0.00193488
Cyb5a	8.7685	0.000159199	0.173625	0.198128	0.000209741	0.00193488
Pum1	8.76809	0.000159264	-0.114341	-0.189904	0.000209741	0.00193488
Sla	8.76359	0.000159978	0.131557	0.196493	0.000209741	0.00193488
Abl1	8.73956	0.000163849	-0.135566	-0.198104	0.000211758	0.00194265
Alkbh1	8.73603	0.000164426	-0.0702377	-0.194999	0.000211758	0.00194265
Inpp5e	8.74684	0.000162667	-0.0396518	-0.19654	0.000211758	0.00194265
Kdm2a	8.73248	0.000165006	-0.110403	-0.173854	0.000211758	0.00194265
Nedd8	8.73075	0.000165292	-0.232891	-0.191554	0.000211758	0.00194265
Pnkp	8.72743	0.000165839	0.0607948	0.190757	0.000211758	0.00194265
Rnmt	8.72024	0.000167028	-0.110012	-0.148801	0.000213774	0.00195933
Eif3a	8.70865	0.000168966	-0.178065	-0.197795	0.000215791	0.00197417
Smarcd2	8.71274	0.00016828	-0.126226	-0.196348	0.000215791	0.00197417
Rpl18a	8.70656	0.000169317	-0.599621	-0.162638	0.000217808	0.00199078
Anp32e	8.68578	0.000172853	-0.240274	-0.197121	0.000221841	0.00201281
Dag1	8.67232	0.000175184	-0.102242	-0.196847	0.000221841	0.00201281
Eml4	8.68561	0.000172883	-0.0533535	-0.195933	0.000221841	0.00201281
Pan3	8.68995	0.000172139	-0.0711518	-0.185838	0.000221841	0.00201281
Prcp	8.69426	0.000171401	-0.0750836	-0.190191	0.000221841	0.00201281
Shc1	8.68766	0.00017253	0.0871669	0.180629	0.000221841	0.00201281
Top1	8.68496	0.000172994	-0.144393	-0.197088	0.000221841	0.00201281
Ube2a	8.69009	0.000172115	0.105151	0.191937	0.000221841	0.00201281
Abca2	8.65746	0.000177792	-0.075885	-0.191583	0.000225875	0.00203822
Ezr	8.66715	0.000176087	0.159917	0.183021	0.000225875	0.00203822
Pnrc1	8.6665	0.0001762	-0.114864	-0.19029	0.000225875	0.00203822
Ppp1r13b	8.65057	0.000179015	-0.0262483	-0.195568	0.000225875	0.00203822
Tk1	8.66272	0.000176864	-0.26351	-0.185763	0.000225875	0.00203822
Ttf2	8.65579	0.000178087	-0.0686868	-0.150792	0.000225875	0.00203822
Gpsm3	8.64775	0.000179518	0.0447464	0.119875	0.000227891	0.00205268
Wdr1	8.64865	0.000179357	0.224266	0.187594	0.000227891	0.00205268
Rps17	8.63743	0.00018137	-0.712239	-0.195938	0.000229908	0.00206709
Tia1	8.63275	0.000182218	-0.128297	-0.181651	0.000229908	0.00206709
Arhgap24	8.61829	0.000184857	0.0495697	0.144633	0.000237975	0.00213575
Ssr2	8.61605	0.000185269	0.13232	0.195038	0.000237975	0.00213575
Ccl9	8.59832	0.000188566	-0.222087	-0.146772	0.000239992	0.00214029
Cdk9	8.57782	0.000192451	-0.132704	-0.195732	0.000239992	0.00214029
Csk	8.57617	0.000192767	-0.159374	-0.183777	0.000239992	0.00214029
Kdm2b	8.59426	0.000189329	-0.100093	-0.189037	0.000239992	0.00214029
Pbdc1	8.57429	0.000193129	0.12729	0.182183	0.000239992	0.00214029
Rgs14	8.60301	0.000187688	0.0330445	0.182677	0.000239992	0.00214029
Slc25a4	8.60148	0.000187975	-0.147003	-0.18283	0.000239992	0.00214029
Esd	8.54583	0.000198675	0.103495	0.195584	0.000242009	0.00214669
Ifnar2	8.5445	0.000198937	-0.187261	-0.195137	0.000242009	0.00214669
Rcsd1	8.54445	0.000198948	0.0603979	0.152241	0.000242009	0.00214669
Taldo1	8.55174	0.00019751	0.195189	0.195403	0.000242009	0.00214669
Thoc7	8.55561	0.000196751	-0.131048	-0.194954	0.000242009	0.00214669
Vdac2	8.55962	0.000195968	0.141421	0.0668493	0.000242009	0.00214669
Polr1c	8.538	0.000200229	-0.0869143	-0.191721	0.000246042	0.00218052
Coro2a	8.51972	0.000203904	0.179123	0.195347	0.000248059	0.00219056
Csf1	8.52064	0.000203717	0.0449096	0.190795	0.000248059	0.00219056
Hgh1	8.51727	0.000204401	-0.0816716	-0.190751	0.000248059	0.00219056
Mex3d	8.52343	0.000203153	-0.0337537	-0.192676	0.000248059	0.00219056
Cpd	8.5151	0.000204843	0.106144	0.193201	0.000250076	0.00220641
Cd82	8.51094	0.000205691	0.059137	0.193337	0.000252092	0.00221828
Cfdp1	8.50805	0.000206284	-0.154434	-0.195004	0.000252092	0.00221828
Mmp14	8.49931	0.000208087	-0.0330233	-0.192666	0.000252092	0.00221828
Gpr146	8.48282	0.000211528	0.082719	0.188883	0.000254109	0.00223404
Chmp2a	8.46599	0.000215099	0.105975	0.188675	0.000256126	0.00224382
Cmas	8.4651	0.000215291	0.155698	0.171384	0.000256126	0.00224382
Gpn3	8.47696	0.000212765	-0.048448	-0.175438	0.000256126	0.00224382
Senp6	8.47982	0.000212161	-0.089352	-0.193717	0.000256126	0.00224382
AI504432	8.45007	0.000218534	-0.0718245	-0.186869	0.000258143	0.00225352
Dym	8.452	0.000218115	0.0359058	0.190121	0.000258143	0.00225352
Limd2	8.4566	0.000217118	-0.140578	-0.175461	0.000258143	0.00225352
Ndufs6	8.44546	0.000219539	0.129554	0.182745	0.000258143	0.00225352
Pip4k2c	8.43716	0.000221359	0.0939514	0.185056	0.000260159	0.00226913
Rbm15b	8.42275	0.000224556	-0.0904222	-0.194555	0.000268226	0.00233538
Setdb1	8.41377	0.000226571	-0.0681142	-0.193119	0.000268226	0.00233538
Gnai2	8.40362	0.000228869	0.329657	0.184189	0.000270243	0.00235088
Ptger2	8.38598	0.000232923	0.0190019	0.169878	0.000274276	0.00238387
Cyp4f18	8.35977	0.000239075	0.0373839	0.179057	0.000282343	0.00244969
Lats2	8.37207	0.000236168	0.0700064	0.159848	0.000282343	0.00244969
Lrrc8b	8.35356	0.000240557	0.0947488	0.192179	0.00028436	0.00246503
AI987944	8.34336	0.000243012	0.0860171	0.189928	0.000288394	0.00249346
Prpf19	8.33577	0.000244854	0.0726004	0.16709	0.000288394	0.00249346
Rnh1	8.33853	0.000244182	0.144569	0.154477	0.000288394	0.00249346
Gatad2a	8.32837	0.000246663	-0.12613	-0.180297	0.000292427	0.00252613
Phlpp1	8.31503	0.00024996	-0.0161959	-0.18784	0.000296461	0.00255875
Adora2b	8.29001	0.000256261	0.0488533	0.147033	0.000304528	0.00261698
Def8	8.28921	0.000256464	0.0907177	0.18848	0.000304528	0.00261698
Ogfr	8.293	0.000255498	-0.105145	-0.187473	0.000304528	0.00261698
Ptpn12	8.30596	0.000252226	0.0978975	0.167153	0.000304528	0.00261698
Slc35e1	8.29258	0.000255607	0.0596022	0.170684	0.000304528	0.00261698
Lman1	8.27939	0.000258984	-0.186475	-0.192873	0.000312595	0.00268398
Nup62	8.27351	0.000260503	-0.125848	-0.13418	0.000314611	0.00269663
Trp53i11	8.27388	0.000260407	-0.0378146	-0.188376	0.000314611	0.00269663
Ankrd10	8.25968	0.000264113	-0.0652155	-0.192583	0.000322678	0.00275387
Gas7	8.26077	0.000263826	0.0874116	0.178634	0.000322678	0.00275387
Pbx3	8.25796	0.000264565	0.0358527	0.172482	0.000322678	0.00275387
Plaur	8.26371	0.000263056	0.0998377	0.187955	0.000322678	0.00275387
Rgl1	8.26076	0.000263828	-0.024717	-0.190557	0.000322678	0.00275387
Soat1	8.22581	0.000273165	0.111086	0.162715	0.000332762	0.00283749
Mxd1	8.21386	0.000276433	0.0791635	0.152944	0.000336795	0.00286449
Pmvk	8.21578	0.000275904	0.10289	0.184541	0.000336795	0.00286449
Rps29	8.21795	0.000275309	0.308291	0.158086	0.000336795	0.00286449
B4galt3	8.2025	0.000279574	0.0441419	0.190603	0.000338812	0.00287425
Gcsh	8.19611	0.000281358	-0.0476235	-0.185318	0.000338812	0.00287425
Zdhhc7	8.19901	0.000280549	0.0367352	0.142761	0.000338812	0.00287425
B230208H11Rik	8.18194	0.000285353	0.0583554	0.186685	0.000344862	0.0029156
Egfl7	8.18187	0.000285373	-0.0492657	-0.185829	0.000344862	0.0029156
Oasl1	8.18154	0.000285466	-0.0446309	-0.180445	0.000344862	0.0029156
Ube2i	8.18444	0.000284646	-0.274206	-0.188636	0.000344862	0.0029156
Adgre5	8.17563	0.00028715	0.00738728	0.0716592	0.000346879	0.00293015
Lrrc1	8.1703	0.000288678	-0.0269859	-0.184993	0.000348896	0.00294218
Rnf13	8.16926	0.000288978	-0.0849551	-0.186755	0.000348896	0.00294218
Abcc1	8.16855	0.000289182	-0.137136	-0.190083	0.000350913	0.00295667
Carhsp1	8.14977	0.000294636	0.0760296	0.176	0.000354946	0.00298812
Fpgs	8.13376	0.000299368	-0.0382434	-0.189544	0.000363013	0.00305085
Mllt4	8.134	0.000299297	-0.0405234	-0.186611	0.000363013	0.00305085
Ly6e	8.12112	0.000303156	-0.491966	-0.188972	0.000367046	0.00307692
Prkaca	8.12249	0.000302744	0.0899634	0.184348	0.000367046	0.00307692
Zcchc11	8.12036	0.000303386	-0.0346606	-0.175557	0.000367046	0.00307692
2410006H16Rik	8.11352	0.000305458	-0.109417	-0.157636	0.000369063	0.003086
Prss57	8.11239	0.000305802	0.0399181	0.190892	0.000369063	0.003086
Spsb2	8.1126	0.000305737	0.0386156	0.190938	0.000369063	0.003086
Eef1g	8.11007	0.000306508	-0.207854	-0.178673	0.000373097	0.00311448
Prkar2b	8.10788	0.000307176	0.0779369	0.190156	0.000373097	0.00311448
Dohh	8.10378	0.000308433	-0.0722168	-0.185819	0.000375113	0.00312868
Bzw2	8.08234	0.000315086	-0.127648	-0.188967	0.00038318	0.00317992
Cd24a	8.07923	0.000316062	-0.0969992	-0.114629	0.00038318	0.00317992
Ndufc1	8.08389	0.000314598	0.195509	0.181769	0.00038318	0.00317992
Nfam1	8.08083	0.000315559	0.117174	0.190571	0.00038318	0.00317992
Tsn	8.07921	0.000316069	-0.202174	-0.185069	0.00038318	0.00317992
Wbp5	8.08821	0.00031325	0.174391	0.163341	0.00038318	0.00317992
Rbm39	8.05507	0.000323752	-0.15971	-0.187274	0.000389231	0.00322204
Smarcd1	8.05708	0.000323106	-0.0600776	-0.185125	0.000389231	0.00322204
Ugp2	8.06489	0.000320603	0.132289	0.187334	0.000389231	0.00322204
Topbp1	8.05337	0.000324302	-0.118827	-0.17166	0.000393264	0.00325271
Kdm1a	8.02137	0.000334795	-0.0661021	-0.188939	0.000399314	0.0033
Ldb1	8.018	0.00033592	-0.0964182	-0.18538	0.000401331	0.0033084
Osbpl2	8.01325	0.000337512	0.0541274	0.178251	0.000401331	0.0033084
Ptger3	8.01847	0.000335762	-0.0544845	-0.185676	0.000401331	0.0033084
Blvrb	8.00788	0.000339318	0.0491744	0.156116	0.000405365	0.00333887
Uqcr10	7.99713	0.00034297	0.163632	0.186442	0.000413431	0.00340249
Atp11b	7.99207	0.000344701	0.122803	0.183691	0.000417465	0.00343284
Akr1a1	7.97147	0.00035184	-0.248581	-0.186267	0.000427549	0.00350124
Dazap1	7.95609	0.000357268	-0.114832	-0.18739	0.000427549	0.00350124
Dgcr2	7.96012	0.000355837	-0.0770181	-0.188414	0.000427549	0.00350124
Sema4d	7.95916	0.000356177	-0.0828102	-0.182354	0.000427549	0.00350124
Timm10b	7.96395	0.000354482	0.128926	0.187904	0.000427549	0.00350124
Fxyd5	7.94771	0.00036026	0.0799278	0.13346	0.000433599	0.00354201
Oaf	7.9472	0.000360442	-0.0192178	-0.185908	0.000433599	0.00354201
Pde1b	7.94769	0.000360266	0.0199021	0.156964	0.000433599	0.00354201
Csf2rb	7.93567	0.000364603	0.257359	0.186592	0.000443683	0.0036214
Rsrc1	7.93167	0.000366056	-0.0631502	-0.17837	0.000445699	0.00363487
mt-Nd2	7.92881	0.000367099	0.678359	0.143065	0.000447716	0.00364832
Ciz1	7.9124	0.000373143	0.0344507	0.174644	0.000459816	0.00374384
Cd52	7.90831	0.000374666	0.16229	0.160497	0.00046385	0.00377049
Nme2	7.90494	0.000375925	-0.0879738	-0.058897	0.00046385	0.00377049
Arhgef3	7.89678	0.000378989	0.0319464	0.147755	0.000465867	0.00378378
Cltb	7.88611	0.000383036	0.107286	0.178723	0.000471917	0.00382666
Nlgn2	7.88621	0.000382999	-0.030603	-0.164112	0.000471917	0.00382666
Sipa1	7.87676	0.000386618	0.0924315	0.180338	0.00047595	0.00385621
Gbp3	7.85966	0.000393252	-0.0645053	-0.179235	0.000488051	0.00395102
Rpl35a	7.84825	0.000397745	0.472815	0.187836	0.000494101	0.00399348
Tom1	7.84671	0.000398357	0.0591944	0.187412	0.000494101	0.00399348
Cluh	7.84375	0.000399529	-0.0854744	-0.177547	0.000496118	0.00400325
Gm2a	7.84318	0.000399759	-0.0510191	-0.0977321	0.000496118	0.00400325
Maf	7.83901	0.000401419	-0.0294113	-0.17417	0.000504185	0.00406504
Mcm3	7.83561	0.000402778	-0.140233	-0.132357	0.000508218	0.00409423
Rpl21	7.83301	0.000403824	-0.502396	-0.160228	0.000510235	0.00410714
S100pbp	7.82763	0.00040599	-0.0177497	-0.0652677	0.000516285	0.00415247
Snd1	7.81242	0.000412186	-0.150716	-0.181369	0.000518302	0.00416532
Top1mt	7.7999	0.000417352	-0.0109555	-0.087426	0.000526369	0.00422672
2610002M06Rik	7.78857	0.000422087	0.0657564	0.152768	0.000528386	0.00423948
Rsl24d1	7.78683	0.000422819	-0.0549829	-0.11853	0.000530402	0.00425222
Mcl1	7.78485	0.000423651	0.205545	0.152107	0.000532419	0.00426494
Hdac4	7.78019	0.000425624	0.0594856	0.174316	0.000534436	0.00427419
Mrfap1	7.78333	0.000424292	-0.253863	-0.179728	0.000534436	0.00427419
C2cd3	7.77418	0.000428176	-0.0828688	-0.186952	0.000540486	0.0043191
Mafk	7.75605	0.000435974	-0.0584224	-0.186653	0.00055057	0.00438907
Srsf7	7.75338	0.000437133	-0.109526	-0.182099	0.00055057	0.00438907
Wrb	7.75547	0.000436222	-0.0590806	-0.18275	0.00055057	0.00438907
St13	7.74908	0.000439006	-0.164754	-0.174205	0.000552586	0.00440161
Gfer	7.72982	0.000447504	-0.0473954	-0.1708	0.00056267	0.00447474
Nfix	7.7278	0.000448407	-0.0487043	-0.184714	0.00056267	0.00447474
Mettl7a3	7.72362	0.000450275	0.0304178	0.153739	0.000564687	0.00448718
Etnk1	7.72054	0.000451659	-0.100216	-0.181377	0.000566704	0.004496
Man1a	7.72289	0.000450603	-0.0532104	-0.166167	0.000566704	0.004496
Ssna1	7.71956	0.000452099	0.074358	0.178924	0.00056872	0.00450839
Ccdc124	7.71768	0.000452945	0.0691512	0.184871	0.000570737	0.00451716
Ube2d2a	7.71848	0.000452584	-0.186081	-0.178832	0.000570737	0.00451716
Chchd6	7.70251	0.000459837	-0.0280804	-0.185992	0.000574771	0.00454545
Ltb	7.69945	0.000461238	0.00606813	0.046014	0.000580821	0.00458964
BC100530	7.69449	0.000463522	0.012657	0.12631	0.000584854	0.00461416
Polr2f	7.69534	0.000463128	-0.164967	-0.183091	0.000584854	0.00461416
Atf7ip2	7.68585	0.000467525	0.044796	0.161983	0.000590905	0.00465449
Il2ra	7.68383	0.000468466	-0.0232321	-0.16647	0.000590905	0.00465449
Gmfg	7.68298	0.000468864	0.130388	0.170666	0.000592921	0.00466297
Tbc1d10b	7.6821	0.000469273	0.100314	0.184476	0.000592921	0.00466297
Ncf1	7.67138	0.000474306	0.134777	0.18485	0.000603005	0.00473851
U2af2	7.66753	0.000476128	0.192336	0.138136	0.000605022	0.00475059
Cnih1	7.65887	0.000480249	-0.156255	-0.182783	0.000607038	0.00475513
Dhx58	7.6657	0.000476995	-0.0837317	-0.183565	0.000607038	0.00475513
Pim1	7.66547	0.000477108	-0.314861	-0.161858	0.000607038	0.00475513
Arhgef6	7.65655	0.00048136	0.118416	0.184365	0.000609055	0.00476717
Cnot6l	7.6406	0.000489064	-0.122749	-0.176252	0.000623172	0.00487382
Hsd17b12	7.63406	0.00049226	0.14043	0.185255	0.000627206	0.0049015
9430076C15Rik	7.62503	0.000496705	-0.0383361	-0.172327	0.000633256	0.00494488
Creb3l1	7.60751	0.000505443	0.0228706	0.162468	0.00063729	0.00496075
Polr2c	7.60679	0.000505803	-0.102761	-0.184553	0.00063729	0.00496075
Rps15a	7.61343	0.000502469	-0.33718	-0.184092	0.00063729	0.00496075
Tesk2	7.60904	0.000504674	0.0298205	0.174559	0.00063729	0.00496075
Impact	7.60212	0.000508159	-0.0687487	-0.171504	0.000639306	0.00497255
St3gal1	7.5948	0.000511875	0.0738036	0.16987	0.000647373	0.00503135
Fuca1	7.59074	0.000513952	0.0809129	0.181784	0.00064939	0.00503912
Slfn4	7.58845	0.000515121	0.0191796	0.144403	0.00064939	0.00503912
Nfe2l2	7.57013	0.000524601	-0.103333	-0.0994991	0.00065544	0.00507813
Polr2m	7.57029	0.000524517	-0.101965	-0.183587	0.00065544	0.00507813
Abi2	7.56786	0.00052579	-0.0698111	-0.184222	0.000657457	0.0050858
Filip1l	7.56348	0.000528088	-0.0295561	-0.121484	0.000657457	0.0050858
Ipo4	7.55384	0.000533178	-0.03249	-0.179847	0.000667541	0.00515576
Usp25	7.55367	0.000533269	-0.145062	-0.18406	0.000667541	0.00515576
Mpzl1	7.5428	0.000539069	-0.0276943	-0.173346	0.000671574	0.00517885
Phlda1	7.5491	0.000535702	0.0451942	0.172046	0.000671574	0.00517885
Sestd1	7.54013	0.000540504	-0.0337573	-0.127073	0.000675608	0.00520186
Sumo2	7.54004	0.000540552	-0.227019	-0.18412	0.000675608	0.00520186
Acsl3	7.53557	0.000542966	-0.085655	-0.181175	0.000679641	0.00522886
Frat2	7.52772	0.000547225	-0.0392722	-0.183824	0.000685691	0.00527132
Pin1	7.52495	0.000548735	-0.155611	-0.183859	0.000689725	0.00529822
Isg20	7.52305	0.000549772	-0.0707029	-0.151856	0.000691741	0.0053096
Pstpip1	7.51224	0.00055572	0.106609	0.183547	0.000699808	0.00536736
Dach1	7.51137	0.000556202	0.00880777	0.142679	0.000701825	0.00537452
Nifk	7.51068	0.000556585	-0.0944926	-0.183051	0.000701825	0.00537452
Mars2	7.50862	0.00055773	-0.0324256	-0.174947	0.000703842	0.0053858
Acp6	7.50336	0.000560657	-0.016334	-0.0594341	0.000707875	0.00540832
Padi2	7.50435	0.000560102	-0.0265525	-0.169353	0.000707875	0.00540832
Rbm17	7.49997	0.000562554	-0.131663	-0.181889	0.000709892	0.00541538
Rcbtb2	7.50093	0.000562015	-0.0237602	-0.0873049	0.000709892	0.00541538
Borcs8	7.49511	0.000565278	0.0344685	0.163957	0.000724009	0.00551036
Dnajc8	7.49639	0.000564561	-0.239977	-0.181761	0.000724009	0.00551036
Eftud2	7.49594	0.000564814	-0.0638976	-0.13663	0.000724009	0.00551036
Gm16286	7.4922	0.000566921	-0.120714	-0.158469	0.000730059	0.00555215
2700060E02Rik	7.48205	0.000572675	-0.165812	-0.181812	0.000744177	0.00565084
Zfp963	7.48153	0.000572973	0.00531773	0.0540649	0.000744177	0.00565084
Irf2bp2	7.46494	0.000582518	-0.176661	-0.177279	0.000752244	0.00570773
Isca2	7.46124	0.000584666	0.0728796	0.176206	0.00075426	0.00571429
Rasgef1b	7.45962	0.000585607	-0.0239666	-0.182843	0.00075426	0.00571429
Alyref	7.44953	0.000591518	-0.167889	-0.128074	0.000758294	0.00572298
Cd300c2	7.45308	0.000589431	0.0594844	0.13568	0.000758294	0.00572298
Fam60a	7.4466	0.00059325	-0.0680728	-0.180794	0.000758294	0.00572298
Tirap	7.45222	0.000589937	0.0530512	0.10976	0.000758294	0.00572298
Znhit1	7.45295	0.000589508	0.059698	0.173255	0.000758294	0.00572298
Epb41	7.44206	0.000595934	0.0858603	0.182797	0.000760311	0.00572513
Hist1h4i	7.43849	0.000598056	0.0326985	0.153675	0.000760311	0.00572513
Tm9sf3	7.44338	0.000595156	-0.207054	-0.182441	0.000760311	0.00572513
Daxx	7.43021	0.000603008	-0.114203	-0.179235	0.000762327	0.00573596
Gm5416	7.42817	0.000604232	0.0140591	0.149006	0.000768378	0.0057771
H2-Q4	7.42333	0.000607151	-0.096936	-0.175468	0.000770394	0.00578788
Snn	7.41133	0.000614451	-0.018509	-0.177089	0.000774428	0.00581378
Slfn1	7.40306	0.000619526	0.0310241	0.108259	0.000778461	0.00583964
Txlna	7.3999	0.000621482	-0.100361	-0.182031	0.000780478	0.00585034
Exosc2	7.39855	0.000622315	0.134701	0.165121	0.000784511	0.00587613
Nagk	7.39609	0.000623842	0.0678625	0.175565	0.000786528	0.00588679
Hip1	7.3864	0.000629892	-0.0800861	-0.182239	0.000798629	0.00597285
Lig4	7.38564	0.000630366	0.0151331	0.17372	0.000800645	0.00597892
Tiam1	7.38563	0.000630371	0.0561821	0.126048	0.000800645	0.00597892
Ppp1r15b	7.38481	0.00063089	0.100036	0.136719	0.000802662	0.00598947
Snrk	7.3799	0.000633979	0.0456079	0.135172	0.000804679	0.006
Rps7	7.3724	0.000638729	-0.255743	-0.180601	0.000812746	0.0060556
Rpl31	7.36145	0.000645732	-0.410728	-0.180837	0.000814763	0.00605697
Thbs1	7.36557	0.000643088	0.0926321	0.181966	0.000814763	0.00605697
Zcchc10	7.36249	0.000645066	-0.073625	-0.180728	0.000814763	0.00605697
Eef1e1	7.35275	0.000651347	-0.0901106	-0.15271	0.000824846	0.00612275
Hmox1	7.35488	0.00064997	0.121033	0.136562	0.000824846	0.00612275
Hacd4	7.3481	0.00065437	0.0680938	0.143958	0.000826863	0.00612855
Tex10	7.34925	0.000653626	-0.0395405	-0.159413	0.000826863	0.00612855
Vma21-ps	7.32902	0.000666923	0.0493354	0.181309	0.00083493	0.00618372
Txndc12	7.31414	0.000676877	0.125316	0.18046	0.000849047	0.00628358
Arfip1	7.30463	0.000683316	0.0605328	0.138629	0.000853081	0.00628529
Cbx5	7.30752	0.00068135	-0.125981	-0.180671	0.000853081	0.00628529
Jade2	7.30932	0.000680131	-0.0111515	-0.153586	0.000853081	0.00628529
Pabpn1	7.29775	0.000688012	-0.214487	-0.180273	0.000853081	0.00628529
Rfx7	7.29778	0.000687991	-0.0844035	-0.176087	0.000853081	0.00628529
St8sia1	7.30998	0.000679683	-0.0239692	-0.176392	0.000851064	0.00628529
Etfb	7.29418	0.00069046	0.085216	0.176831	0.000855097	0.0062908
Ptprk	7.29437	0.000690328	-0.0353765	-0.167563	0.000855097	0.0062908
Ing3	7.28045	0.000699964	-0.0500779	-0.155468	0.000861148	0.00633062
Smad3	7.27229	0.00070567	-0.0143599	-0.172897	0.000865181	0.00635556
Mcur1	7.26774	0.000708876	-0.0959618	-0.16205	0.000869214	0.00638046
Ccdc62	7.2657	0.000710315	0.180321	0.137843	0.000871231	0.00639053
Ikbke	7.26212	0.000712856	0.0425582	0.177054	0.000875265	0.00641537
Ttf1	7.25744	0.000716187	0.239573	0.122224	0.000877281	0.00642541
Hjurp	7.24923	0.00072206	0.0972087	0.16988	0.000885348	0.00647493
Hs3st3b1	7.24902	0.000722216	0.0648868	0.170221	0.000885348	0.00647493
Txnrd3	7.23423	0.000732927	-0.0286185	-0.172572	0.000897449	0.00655859
Eif1ad	7.22912	0.000736665	-0.133813	-0.177497	0.000899466	0.00656848
Rpf2	7.22419	0.000740287	-0.0531818	-0.141059	0.000905516	0.0066078
2810403A07Rik	7.21857	0.000744443	-0.0684764	-0.176525	0.000909549	0.00662748
Tmem109	7.22214	0.000741803	-0.0581027	-0.175019	0.000909549	0.00662748
Clec2d	7.21173	0.00074953	-0.0391195	-0.180088	0.000911566	0.00662757
Hexim1	7.21649	0.00074599	-0.117004	-0.174494	0.000911566	0.00662757
Rfc1	7.21513	0.000746996	-0.0895662	-0.176073	0.000911566	0.00662757
Mfsd4a	7.20093	0.000757638	-0.0183778	-0.0868327	0.000919633	0.00667643
Srsf9	7.20123	0.000757406	-0.104061	-0.179954	0.000919633	0.00667643
Renbp	7.18395	0.00077055	0.0447632	0.165127	0.0009277	0.00673007
Rilpl2	7.18373	0.000770718	0.0490649	0.152498	0.000929717	0.00673977
Galnt3	7.1752	0.000777299	0.0418521	0.170557	0.00093375	0.00676406
Pwwp2a	7.16355	0.000786363	-0.0571845	-0.162591	0.000941817	0.00681752
Ppdpf	7.16302	0.000786777	-0.0597087	-0.163496	0.000945851	0.00683673
Rpl36a	7.16266	0.000787062	-0.301939	-0.175579	0.000945851	0.00683673
Hal	7.15956	0.000789498	0.0121712	0.133457	0.000951901	0.00687546
Cd2ap	7.1509	0.000796332	-0.0685207	-0.177	0.000957951	0.00691412
Nufip2	7.14407	0.000801767	-0.083102	-0.15419	0.000964001	0.00694767
Tubb6	7.14324	0.000802424	0.0530575	0.178108	0.000964001	0.00694767
Med30	7.14247	0.000803041	-0.061746	-0.112022	0.000970051	0.00698113
Mrpl53	7.14091	0.000804291	-0.134118	-0.155378	0.000970051	0.00698113
Kcnk13	7.13995	0.000805058	0.0403979	0.176907	0.000972068	0.00698551
Nudt3	7.14006	0.000804973	0.106866	0.179191	0.000972068	0.00698551
Nedd9	7.1362	0.000808069	0.0355321	0.150968	0.000974085	0.00698987
Sf3b3	7.13368	0.000810104	-0.0587846	-0.0865372	0.000974085	0.00698987
Fbxo4	7.1282	0.000814535	0.0598512	0.175116	0.000976102	0.00699928
Slc4a7	7.1221	0.000819498	-0.0603005	-0.177951	0.000984169	0.00705202
Mettl1	7.10766	0.000831366	-0.0373971	-0.147363	0.000992236	0.00710469
Ago2	7.09364	0.000843056	-0.189997	-0.178614	0.000996269	0.00711303
Creb1	7.09826	0.000839179	-0.106624	-0.178567	0.000996269	0.00711303
Cyfip1	7.09503	0.000841888	0.114375	0.152504	0.000996269	0.00711303
Mfge8	7.09452	0.000842312	-0.0345776	-0.162917	0.000996269	0.00711303
Rgs19	7.09136	0.000844971	0.127831	0.177586	0.000998286	0.0071223
Adam8	7.0868	0.000848811	-0.0630687	-0.152979	0.00100434	0.00716032
Lat2	7.0819	0.000852966	-0.103086	-0.153077	0.00101442	0.00722701
Ets2	7.07095	0.000862315	-0.0394016	-0.17616	0.00102047	0.0072649
Anks1	7.06784	0.000864989	-0.0817562	-0.178023	0.00102249	0.00727403
Ctdsp2	7.06388	0.000868411	-0.0173944	-0.0642663	0.00102854	0.00731183
P4ha1	7.06006	0.000871722	-0.117227	-0.177014	0.00103055	0.00732092
Dnajc9	7.05359	0.000877351	-0.126993	-0.174083	0.00103459	0.00733906
Ppbp	7.05456	0.000876509	0.0303845	0.173728	0.00103459	0.00733906
Got1	7.04733	0.000882842	-0.0970094	-0.177935	0.0010487	0.00743388
Treml2	7.04356	0.000886155	0.0997386	0.162949	0.00105475	0.00747143
Anapc1	7.02704	0.000900854	-0.0432911	-0.0876244	0.00107291	0.00757835
Dtl	7.02696	0.000900928	-0.110353	-0.175753	0.00107291	0.00757835
Itgb7	7.02768	0.000900287	-0.0321717	-0.177789	0.00107291	0.00757835
Nubp1	7.02653	0.000901318	-0.0798267	-0.17033	0.00107291	0.00757835
Rhof	7.01844	0.000908605	0.043485	0.14369	0.00108097	0.00762447
Znrf2	7.01879	0.000908292	-0.0733269	-0.15223	0.00108097	0.00762447
Imp3	7.01704	0.000909869	-0.102382	-0.167695	0.00108299	0.00763326
Cacnb2	7.01228	0.000914192	-0.0179464	-0.168864	0.00108904	0.00767045
Dbnl	7.00888	0.0009173	0.102723	0.176268	0.00109509	0.00769667
Hoxb4	7.00671	0.000919277	0.0518393	0.172611	0.00109509	0.00769667
Nek6	7.00645	0.000919518	-0.0943695	-0.176403	0.00109509	0.00769667
Tmem29	7.00094	0.000924578	0.0358536	0.156097	0.00110114	0.00773371
Dram2	6.99683	0.000928367	0.0768577	0.175108	0.00111122	0.00779901
Xbp1	6.99541	0.000929686	0.193264	0.17735	0.00111526	0.00782178
Aldh1l1	6.99235	0.000932516	0.0285405	0.168509	0.00111727	0.00783039
Atp6v0b	6.98015	0.000943914	0.164674	0.163247	0.00113139	0.00791814
Chst12	6.97751	0.0009464	0.0700253	0.176379	0.00113139	0.00791814
Trappc11	6.97377	0.000949933	0.111923	0.176827	0.00113341	0.00792666
Hnrnpr	6.96324	0.000959944	-0.119461	-0.169378	0.00113946	0.00794655
Hsph1	6.96458	0.000958668	-0.12269	-0.171547	0.00113946	0.00794655
Ptch1	6.96648	0.000956859	-0.0355206	-0.176924	0.00113946	0.00794655
Rab7b	6.96659	0.000956754	-0.0593529	-0.152075	0.00113946	0.00794655
1700109H08Rik	6.95494	0.000967913	-0.0229679	-0.176037	0.00115156	0.00801966
Rpl12	6.9538	0.000969012	0.151201	0.0402323	0.00115156	0.00801966
Haus2	6.9462	0.000976373	-0.0379094	-0.115163	0.00115559	0.00803647
Trim8	6.9498	0.000972876	-0.0609277	-0.157683	0.00115559	0.00803647
Fkbp1b	6.94029	0.000982134	0.00629024	0.0261501	0.00116164	0.00807288
Gls	6.92623	0.000995985	-0.0904651	-0.176326	0.00118181	0.0081958
Mospd3	6.92605	0.000996161	0.0998708	0.145907	0.00118181	0.0081958
Zfp280c	6.92682	0.000995401	-0.0358814	-0.172103	0.00118181	0.0081958
Mis18a	6.92359	0.000998606	0.099919	0.172694	0.00118383	0.00819832
Pnp	6.92271	0.00099948	0.247948	0.155709	0.00118383	0.00819832
Klf7	6.9135	0.00100869	0.0913597	0.162531	0.00119391	0.00826239
Lsm1	6.90657	0.00101568	-0.0640427	-0.175198	0.00119794	0.00828452
Ubald1	6.90232	0.00101999	-0.0557396	-0.175904	0.00120399	0.00832056
Maf1	6.86898	0.00105442	-0.11237	-0.175562	0.00125038	0.0086351
Kank2	6.86289	0.00106083	-0.0371347	-0.173722	0.00125845	0.00868476
Bag2	6.85759	0.00106644	-0.0443013	-0.175249	0.0012645	0.00872045
Dtnbp1	6.85255	0.00107181	0.0805244	0.172707	0.00126853	0.00873005
Pptc7	6.85254	0.00107182	-0.0937436	-0.174333	0.00126853	0.00873005
Rhoj	6.85508	0.00106911	0.0287977	0.169992	0.00126853	0.00873005
Adprh	6.85137	0.00107307	0.13898	0.161129	0.00127256	0.0087474
C5ar2	6.84801	0.00107667	0.018934	0.137355	0.00127458	0.0087474
Plekhg1	6.84555	0.00107932	0.0314525	0.16996	0.00127458	0.0087474
Tpm4	6.84947	0.00107511	-0.204797	-0.158315	0.00127458	0.0087474
Dhx38	6.83276	0.00109314	-0.065575	-0.147714	0.00129475	0.00886128
Nampt	6.83298	0.00109291	-0.106719	-0.141023	0.00129273	0.00886128
Spcs1	6.83283	0.00109307	0.0930779	0.137913	0.00129475	0.00886128
Sys1	6.83278	0.00109313	0.0162715	0.0288595	0.00129475	0.00886128
Ccdc50	6.82467	0.00110199	-0.0859943	-0.136294	0.00129676	0.00886285
Dnmt3b	6.82808	0.00109826	-0.0275893	-0.175087	0.00129676	0.00886285
Ifi44	6.81264	0.00111528	-0.0280546	-0.171699	0.00131088	0.00894701
Sh2d1b1	6.81309	0.00111478	0.0513436	0.154886	0.00131088	0.00894701
Gpbp1	6.79744	0.00113229	-0.0796561	-0.171236	0.00134315	0.00916094
Atp6v0a2	6.79234	0.00113805	-0.0651124	-0.173903	0.00134718	0.00918213
Tmem106b	6.78952	0.00114125	-0.0716699	-0.159134	0.0013492	0.00918956
Pds5a	6.78401	0.00114753	-0.127638	-0.169065	0.00135323	0.00921071
Tbxas1	6.7803	0.00115177	0.0210731	0.119808	0.00136332	0.00927298
Pira2	6.77915	0.0011531	0.0203532	0.105705	0.00136735	0.00929404
Mfsd1	6.77866	0.00115366	0.133524	0.166059	0.00136937	0.00930137
Immp1l	6.76701	0.00116713	0.0548752	0.130573	0.00137945	0.00936345
Fanca	6.7537	0.0011827	0.0468617	0.166314	0.00140768	0.00954204
Ncf4	6.7539	0.00118247	0.0681545	0.17208	0.00140768	0.00954204
Gid4	6.74343	0.00119486	-0.0338792	-0.162922	0.00141777	0.00960383
Snx5	6.74038	0.00119849	-0.14323	-0.161171	0.00142987	0.00967918
Arpc3	6.73778	0.00120161	0.14178	0.141601	0.00143188	0.00968622
Cdk1	6.72942	0.00121165	0.240546	0.172082	0.00143995	0.00973415
Ilkap	6.70923	0.00123626	-0.0786087	-0.158151	0.00147222	0.0099455
Antxr2	6.7051	0.00124136	0.0525867	0.168463	0.0014823	0.0100068
Abhd2	6.69388	0.00125531	0.0715599	0.172499	0.00149844	0.0100881
Gba	6.69788	0.00125031	0.080111	0.173513	0.00149844	0.0100881
Pop1	6.69031	0.00125977	-0.0492913	-0.172481	0.00150045	0.0100881
Rnf14	6.68862	0.00126189	0.0576865	0.172187	0.00150045	0.0100881
Srgap3	6.69676	0.0012517	-0.0166148	-0.139512	0.00149844	0.0100881
Wls	6.69567	0.00125307	0.0963518	0.173478	0.00149844	0.0100881
Slc25a5	6.68504	0.0012664	0.239082	0.171817	0.0015065	0.010122
Nod1	6.67586	0.00127803	0.0371368	0.172028	0.00151457	0.0101693
Noc4l	6.67385	0.0012806	-0.0830143	-0.167837	0.0015186	0.0101894
Neil3	6.67196	0.00128301	0.104335	0.170766	0.00152062	0.0101961
Ssh1	6.66854	0.00128739	-0.0481966	-0.15813	0.00152667	0.0102297
Epsti1	6.66691	0.00128948	-0.0812259	-0.163436	0.00152869	0.0102363
Smad4	6.66103	0.00129705	-0.0846684	-0.172778	0.00153474	0.0102699
4931406C07Rik	6.65707	0.00130217	0.0400346	0.154658	0.00153877	0.01029
Ccdc102a	6.65299	0.00130749	-0.0213828	-0.162378	0.00155087	0.0103499
Glrx5	6.65324	0.00130715	-0.113029	-0.169199	0.00155087	0.0103499
Parl	6.65464	0.00130533	0.164784	0.164021	0.00154886	0.0103499
Clec11a	6.64828	0.00131362	0.0240006	0.170395	0.00155491	0.0103629
Zak	6.65175	0.0013091	0.0882595	0.168284	0.00155491	0.0103629
Fam134a	6.64514	0.00131775	0.0458564	0.159607	0.00155894	0.0103828
6430548M08Rik	6.64215	0.00132167	0.0264798	0.121539	0.00156499	0.0104021
Galk1	6.64113	0.00132302	-0.0795658	-0.172451	0.00156499	0.0104021
Prdx6	6.64195	0.00132194	0.147965	0.171453	0.00156499	0.0104021
Pus7	6.63703	0.00132843	-0.0550692	-0.168983	0.00156902	0.010422
Aldh2	6.63625	0.00132946	0.106735	0.145782	0.00157104	0.0104284
Vps53	6.63129	0.00133605	0.0683024	0.170424	0.00157709	0.0104615
Ndufb11	6.61985	0.00135136	0.0653241	0.113375	0.00158919	0.0105348
Krtcap2	6.60761	0.00136794	0.171843	0.172403	0.00159927	0.0105874
Slc25a39	6.60745	0.00136815	-0.174138	-0.172412	0.00159927	0.0105874
Nus1	6.60356	0.00137346	0.0800241	0.124852	0.00160532	0.0106204
Cep170b	6.59614	0.00138364	-0.0408814	-0.171767	0.00161742	0.0106791
Nop9	6.59749	0.00138179	-0.0748926	-0.171783	0.00161742	0.0106791
Zfp706	6.59546	0.00138459	-0.104478	-0.107239	0.00161742	0.0106791
Klrb1f	6.59188	0.00138954	-0.0888588	-0.127053	0.00162146	0.0106977
Lactb	6.59022	0.00139184	-0.0867757	-0.154202	0.00162347	0.0106977
Sirpb1c	6.59037	0.00139162	0.0314227	0.169446	0.00162347	0.0106977
Capn5	6.5784	0.00140832	-0.0238592	-0.172035	0.00163154	0.0107437
Bahcc1	6.57693	0.00141039	-0.0402763	-0.165468	0.00163759	0.0107692
Camp	6.57684	0.0014105	0.042631	0.104174	0.00163759	0.0107692
Cox18	6.57555	0.00141232	-0.0400675	-0.130537	0.00164163	0.0107886
Lima1	6.57388	0.00141468	0.0402064	0.170093	0.00164768	0.0108212
Gnas	6.56283	0.00143032	-0.344288	-0.167541	0.00166986	0.0109524
Rps14	6.5629	0.00143023	-0.352254	-0.170243	0.00166986	0.0109524
Tmsb10	6.56006	0.00143428	-0.196624	-0.161232	0.00167591	0.0109848
Tomm40	6.54981	0.00144899	-0.0985656	-0.169341	0.00170616	0.0111757
Eif2a	6.54735	0.00145255	-0.12579	-0.151486	0.00171019	0.0111947
Lrrfip2	6.53636	0.00146854	0.0662679	0.16132	0.00173036	0.0113193
Nuf2	6.53513	0.00147035	0.104288	0.169371	0.00173238	0.011325
Lifr	6.52525	0.00148488	-0.0213396	-0.158447	0.00174448	0.0113966
Gm13546	6.52082	0.00149145	0.0135846	0.156092	0.00174851	0.0114004
Gm17018	6.52157	0.00149034	-0.0643436	-0.161097	0.00174851	0.0114004
Otud4	6.52179	0.00149001	-0.0729727	-0.16589	0.00174851	0.0114004
Hspbp1	6.51664	0.00149768	-0.0734579	-0.16693	0.00175456	0.0114323
Etfa	6.49234	0.00153437	0.102811	0.170721	0.00179288	0.0116743
Mgrn1	6.48551	0.00154484	0.0480529	0.139964	0.00179893	0.0116754
Mylk	6.48429	0.00154671	-0.0292353	-0.161478	0.00179893	0.0116754
Rdh12	6.48899	0.00153949	0.0399489	0.15975	0.00179893	0.0116754
Shmt2	6.48718	0.00154228	-0.10076	-0.141266	0.00179893	0.0116754
Zdhhc8	6.48776	0.00154138	-0.0411228	-0.170833	0.00179893	0.0116754
Mrto4	6.48278	0.00154904	-0.058437	-0.151807	0.00180095	0.0116808
B630005N14Rik	6.47957	0.001554	-0.0649995	-0.159685	0.00180901	0.0117255
Cirbp	6.46987	0.0015691	-0.0467804	-0.168735	0.00182515	0.0118223
Tcerg1	6.46013	0.0015844	-0.0682292	-0.156613	0.00184733	0.0119582
Exosc7	6.45125	0.00159847	-0.0851747	-0.169703	0.00186952	0.012086
Trim44	6.45194	0.00159737	-0.0392367	-0.167598	0.00186952	0.012086
Chmp4b	6.44482	0.00160874	-0.197938	-0.169749	0.00187355	0.0121042
Casp6	6.44458	0.00160912	-0.259938	-0.170198	0.00187557	0.0121094
Numb	6.43864	0.00161868	0.0523072	0.155971	0.00188968	0.0121926
Lyl1	6.43489	0.00162473	0.036884	0.154428	0.00189372	0.0122107
Rbm27	6.43378	0.00162652	-0.0685365	-0.161871	0.00189573	0.0122157
Mrps12	6.43009	0.00163252	0.0944056	0.169118	0.00190178	0.0122309
Phf11b	6.43054	0.00163178	-0.0214759	-0.157006	0.00190178	0.0122309
Psmd3	6.42915	0.00163404	-0.137456	-0.160816	0.00190178	0.0122309
Prrg2	6.42672	0.001638	0.0476253	0.166898	0.00190985	0.0122748
Dnmt3l	6.42383	0.00164274	0.0331115	0.160312	0.0019159	0.0123057
Ifih1	6.41884	0.00165091	-0.0449781	-0.158385	0.00192599	0.0123465
Kdsr	6.41998	0.00164904	-0.0582169	-0.169106	0.00192397	0.0123465
Naa15	6.41936	0.00165006	-0.128909	-0.168233	0.00192599	0.0123465
Mrpl40	6.4152	0.00165692	0.0573673	0.169795	0.0019401	0.0124289
Tbrg1	6.41174	0.00166263	0.0490713	0.169607	0.00195019	0.0124855
Vmp1	6.41063	0.00166447	-0.118824	-0.169605	0.0019522	0.0124903
Cst7	6.40671	0.00167098	0.112564	0.168102	0.00195624	0.0125
Hdhd2	6.40672	0.00167097	-0.0800485	-0.169775	0.00195624	0.0125
Gabarapl1	6.40385	0.00167576	-0.0794112	-0.168828	0.00196229	0.0125306
Dennd2d	6.40109	0.00168037	0.0356782	0.169316	0.00196632	0.0125402
Tnfsf9	6.40176	0.00167925	-0.047571	-0.163913	0.00196632	0.0125402
Cmip	6.40044	0.00168146	0.106782	0.150718	0.00196834	0.012545
Calcrl	6.39263	0.00169458	0.0249452	0.118512	0.00198044	0.012614
Mta3	6.38535	0.00170693	-0.0590152	-0.169281	0.00199254	0.0126829
Dancr	6.38224	0.00171222	-0.0218222	-0.160314	0.00199657	0.0127004
Slc7a5	6.37777	0.00171986	-0.115234	-0.160363	0.00200061	0.0127179
Psip1	6.37419	0.001726	-0.111118	-0.169329	0.00200666	0.0127482
Foxo1	6.36979	0.00173358	-0.0312217	-0.168125	0.00201271	0.0127785
Commd1	6.36315	0.00174508	0.0629425	0.167885	0.00203287	0.0128983
Sirpb1b	6.35026	0.00176764	0.0305255	0.153538	0.00205909	0.0130563
Cd1d1	6.3461	0.00177499	-0.0258389	-0.166482	0.00206917	0.0131034
Kptn	6.34623	0.00177476	0.0191988	0.136907	0.00206917	0.0131034
Abhd10	6.33774	0.00178983	0.0582015	0.167064	0.00209136	0.0132355
Nub1	6.32756	0.00180807	0.0612177	0.161366	0.00210749	0.0133291
Zmynd19	6.3263	0.00181034	-0.0534419	-0.166047	0.00210951	0.0133333
Uba2	6.32512	0.00181246	-0.135279	-0.158897	0.00211354	0.0133503
Scarb2	6.31542	0.00183007	0.0847783	0.16041	0.00213976	0.0134987
Siae	6.3145	0.00183174	0.00108576	0.00477982	0.00213976	0.0134987
Zfyve21	6.30871	0.00184234	-0.0204561	-0.129558	0.00214581	0.0135283
Ttyh3	6.30316	0.00185255	-0.0882558	-0.148306	0.00214984	0.0135451
Irf7	6.30213	0.00185446	-0.05463	-0.168346	0.00215388	0.0135533
Nde1	6.30284	0.00185316	-0.0677671	-0.167789	0.00215388	0.0135533
Dgat1	6.28914	0.00187861	0.0253532	0.157875	0.00217203	0.0136588
Edf1	6.28495	0.00188648	0.0970001	0.162274	0.00217606	0.0136755
Nagpa	6.28325	0.00188968	-0.142801	-0.153805	0.00218211	0.0137049
Parp9	6.28177	0.00189246	-0.0453078	-0.148389	0.00218816	0.0137342
Dars	6.28089	0.00189412	0.15935	0.166157	0.00219018	0.0137381
Dock11	6.27939	0.00189696	0.0318255	0.0566738	0.00219623	0.0137674
Parp12	6.26918	0.00191634	-0.0610226	-0.157414	0.00222446	0.0139356
Laptm5	6.26401	0.00192624	-0.255911	-0.152126	0.00223455	0.0139899
Ampd3	6.25035	0.00195264	0.0212094	0.111368	0.00226681	0.014183
Gtf2i	6.24526	0.00196256	-0.0918798	-0.165456	0.00227488	0.0142245
Arsb	6.232	0.00198865	0.0358349	0.145721	0.00230513	0.0144045
Rab33b	6.22733	0.00199793	0.0932545	0.127388	0.00230917	0.0144116
Ube2l3	6.22964	0.00199334	0.182274	0.152718	0.00230917	0.0144116
Cab39	6.22488	0.00200281	0.0438437	0.0824247	0.00231118	0.0144151
Slc39a14	6.22244	0.00200769	-0.0234923	-0.165509	0.00231723	0.0144437
Atg4a	6.21756	0.00201748	0.0418521	0.150971	0.00233135	0.0145044
Dip2a	6.21738	0.00201783	0.0662429	0.165757	0.00233135	0.0145044
Golga3	6.21862	0.00201534	0.0503405	0.0586213	0.00232933	0.0145044
Jund	6.21446	0.00202371	-0.113471	-0.126393	0.00233538	0.0145204
Ppp2r5a	6.21041	0.0020319	0.0972002	0.155049	0.00234547	0.0145739
Il16	6.20175	0.0020495	0.0422775	0.109123	0.00236765	0.0147026
Dennd1a	6.19755	0.0020581	-0.0752162	-0.163358	0.00237774	0.0147559
Rbms3	6.19595	0.00206139	-0.094708	-0.15311	0.00238177	0.0147717
Dhx9	6.19048	0.00207265	-0.114938	-0.164744	0.00239185	0.014825
Slc15a3	6.18655	0.00208076	-0.0532556	-0.165759	0.00239589	0.0148407
Naga	6.18488	0.00208424	0.0439691	0.162607	0.00239992	0.0148564
Pms2	6.17248	0.00211014	-0.0412422	-0.154042	0.00242815	0.0150218
Fam177a	6.16448	0.00212704	0.0930223	0.149761	0.00244227	0.0150998
Ndufs5	6.16014	0.00213624	0.0821262	0.150808	0.00245235	0.0151526
Cct5	6.15343	0.00215058	0.052002	0.105382	0.00246244	0.0152055
Uchl5	6.15297	0.00215157	0.0791204	0.114219	0.00246445	0.0152085
Cad	6.15078	0.00215627	-0.0745561	-0.165388	0.00247252	0.0152488
Nsun4	6.14934	0.00215936	-0.0438983	-0.165955	0.00248059	0.015289
Nrip1	6.14787	0.00216252	-0.0650915	-0.166236	0.00248261	0.0152919
Akr1c13	6.13738	0.00218524	0.0301178	0.142987	0.00250479	0.015419
Fam179b	6.13334	0.00219406	-0.0567363	-0.166033	0.00252092	0.0155087
Mea1	6.13114	0.00219888	0.089891	0.160161	0.00252697	0.0155363
Entpd1	6.12655	0.00220894	0.0187593	0.123833	0.00253504	0.0155762
Bhlhb9	6.11995	0.00222352	-0.0213168	-0.164572	0.00254714	0.0156409
Ptpn7	6.11889	0.00222587	0.103121	0.149657	0.00254916	0.0156436
Pkig	6.10707	0.00225225	-0.0816045	-0.165742	0.00258748	0.0158689
Haus4	6.10485	0.00225723	-0.0649889	-0.165408	0.00259151	0.0158838
Mpdu1	6.10275	0.00226195	0.0473484	0.14329	0.00259554	0.0158987
Fgd4	6.10069	0.00226659	0.065532	0.15723	0.00259756	0.0159012
Cops4	6.09799	0.0022727	-0.119891	-0.165659	0.00260159	0.0159063
Mios	6.09791	0.00227289	-0.0227368	-0.143766	0.00260159	0.0159063
Asah1	6.08984	0.00229124	0.0514349	0.115746	0.00262176	0.0160197
Tdrkh	6.08231	0.0023085	-0.0325345	-0.154077	0.00265201	0.0161946
Clec7a	6.07636	0.00232221	0.0520429	0.137387	0.0026742	0.01631
Mrpl17	6.07316	0.00232963	0.0808071	0.117983	0.0026742	0.01631
2010005H15Rik	6.06992	0.00233717	0.0162383	0.129079	0.00268428	0.0163614
Guca1a	6.0682	0.00234117	0.00451136	0.0213189	0.00269235	0.0164005
Cyp39a1	6.06463	0.00234951	0.0088518	0.163907	0.0026984	0.0164273
Slc44a2	6.06386	0.00235131	-0.0816549	-0.134311	0.00270243	0.0164417
Adprhl2	6.06205	0.00235557	-0.0441093	-0.151404	0.00270445	0.0164439
Tox	6.0471	0.00239092	0.0081049	0.016792	0.00274075	0.0166442
Trappc4	6.04791	0.00238899	0.127819	0.138705	0.00274075	0.0166442
Snhg5	6.03765	0.00241353	-0.0736989	-0.156159	0.00275083	0.0166952
Naf1	6.035	0.00241991	-0.0505442	-0.161439	0.00275688	0.0167217
Tardbp	6.03321	0.00242423	-0.119115	-0.158693	0.0027589	0.0167237
Rsad2	6.02985	0.00243236	-0.0466731	-0.154449	0.00276697	0.0167624
Dna2	6.02147	0.00245276	0.0725239	0.113023	0.0027831	0.0168498
Atf5	6.0171	0.00246346	0.0530423	0.163025	0.00278915	0.0168761
Nid2	6.00862	0.00248437	0.0236721	0.164444	0.00281738	0.0170366
Atp5c1	6.00476	0.00249395	-0.196666	-0.153468	0.00282747	0.0170871
Fasn	6.00425	0.0024952	-0.108256	-0.127866	0.0028315	0.0171011
Acap3	6.00267	0.00249915	0.0406106	0.160306	0.00283553	0.017115
Gm13139	5.9989	0.00250855	0.115241	0.164202	0.00284965	0.0171898
Eif4a2	5.99457	0.00251939	-0.0914088	-0.164154	0.00285772	0.017228
Ipo11	5.99041	0.00252986	-0.0411543	-0.143173	0.00286982	0.0172904
Fam122a	5.97759	0.00256238	0.0295251	0.154591	0.00291015	0.0175228
Sdf2l1	5.97389	0.00257183	0.140047	0.101524	0.00291822	0.0175607
Fh1	5.97273	0.00257482	-0.0699485	-0.143767	0.00292225	0.0175743
Aldh3a2	5.96977	0.00258242	0.0401687	0.101928	0.00293234	0.0176242
Arhgap5	5.9686	0.00258544	-0.0227426	-0.163521	0.00293436	0.0176257
Ehd4	5.9664	0.0025911	-0.121115	-0.155047	0.00294041	0.0176513
Ppp4r2	5.95982	0.00260816	-0.0932654	-0.162463	0.00295251	0.0177132
Rpp40	5.95485	0.00262111	-0.0329439	-0.154963	0.00296259	0.017763
Srm	5.95326	0.00262525	-0.064883	-0.076539	0.00296864	0.0177885
Rps4x	5.95122	0.0026306	-0.276829	-0.159745	0.00297469	0.017814
Depdc1b	5.94299	0.00265225	0.0522527	0.159007	0.00299889	0.0179373
Epb41l2	5.94229	0.00265409	-0.0828018	-0.163255	0.00299889	0.0179373
Nck2	5.94081	0.00265803	0.0142261	0.109453	0.00300494	0.0179626
Spred1	5.93477	0.00267407	-0.0553123	-0.160928	0.00302107	0.0180482
Cirh1a	5.93033	0.00268592	-0.0524656	-0.154116	0.00303923	0.0181457
Esr1	5.92905	0.00268935	0.033567	0.138495	0.00304729	0.0181502
Naa60	5.92966	0.00268772	0.116985	0.15383	0.00304528	0.0181502
Rgcc	5.929	0.00268949	0.0997907	0.16325	0.00304729	0.0181502
Rps8	5.9286	0.00269056	-0.420209	-0.136348	0.00304729	0.0181502
Clptm1l	5.9223	0.00270749	0.0579265	0.115023	0.00306343	0.0182353
Anp32b	5.90858	0.00274477	0.0519164	0.0255826	0.00311586	0.0185363
Cdipt	5.90709	0.00274885	-0.0181691	-0.0328342	0.00311788	0.0185372
BC031181	5.90505	0.00275445	0.0678692	0.150034	0.00312595	0.018574
Cklf	5.89776	0.00277452	0.0690678	0.161737	0.00314813	0.0186834
Sh3kbp1	5.89886	0.00277148	0.0701103	0.142085	0.00314813	0.0186834
Slc30a9	5.89554	0.00278067	-0.0424621	-0.125636	0.00315418	0.0187081
Gtf2h3	5.88705	0.00280428	-0.0361592	-0.152163	0.00317435	0.0188053
Pelo	5.88548	0.00280869	-0.0568644	-0.115157	0.00317435	0.0188053
Cdc25a	5.8794	0.00282576	0.0400449	0.107171	0.00318645	0.0188432
Snap29	5.88233	0.00281751	0.0556794	0.133685	0.00318443	0.0188432
Wbp11	5.87969	0.00282493	-0.0934207	-0.15344	0.00318645	0.0188432
Chchd2	5.87763	0.00283075	-0.331144	-0.125599	0.00319048	0.0188558
Slc25a20	5.87029	0.00285153	0.114329	0.161731	0.0032167	0.0189994
Swap70	5.86013	0.00288053	-0.0692925	-0.149772	0.00324897	0.0191786
Khsrp	5.85811	0.00288634	-0.118519	-0.15111	0.00325502	0.0192029
Rbm26	5.85009	0.00290949	-0.0512806	-0.161312	0.0032772	0.0193222
Lgals1	5.84464	0.00292534	-0.0665931	-0.0297114	0.00330745	0.019489
P2rx4	5.84286	0.00293052	-0.0500693	-0.151635	0.00331754	0.0195368
Pros1	5.8424	0.00293187	-0.021447	-0.0622328	0.00331955	0.0195371
Ankrd13a	5.83892	0.00294205	0.102842	0.11449	0.00334174	0.0196443
Vti1b	5.83878	0.00294246	0.0386442	0.151845	0.00334174	0.0196443
Ndrg1	5.83609	0.00295036	0.0767121	0.159477	0.00335585	0.0197156
Zcchc7	5.83495	0.00295373	-0.0510246	-0.139157	0.00335787	0.0197158
Klhl21	5.8341	0.00295622	-0.0414728	-0.158586	0.0033619	0.0197278
Ebp	5.82956	0.00296962	0.0727824	0.156308	0.00337804	0.0198108
Ndufb7	5.82765	0.00297529	0.0686379	0.107976	0.00338409	0.0198345
Rnase4	5.82199	0.00299211	0.0575068	0.153504	0.00340224	0.0199291
Fam102b	5.82065	0.00299613	-0.0228338	-0.0660357	0.00340627	0.019941
Arhgap17	5.81901	0.00300102	-0.106987	-0.159251	0.00341434	0.0199764
Clmn	5.81868	0.00300199	0.0298635	0.16176	0.00341636	0.0199764
Fosl1	5.81814	0.00300362	0.0258965	0.152153	0.00341837	0.0199764
BC035044	5.81477	0.00301372	-0.0711675	-0.159068	0.00343249	0.0200471
Ggnbp2	5.81075	0.00302582	0.110573	0.160077	0.00344056	0.0200824
Grk5	5.80798	0.00303418	0.0228667	0.160802	0.00344661	0.0201059
Kmt5a	5.79826	0.00306372	0.137479	0.151566	0.00349098	0.0203527
Net1	5.79373	0.00307758	-0.0551917	-0.153756	0.00352324	0.0205288
Kctd10	5.78202	0.00311369	0.0752934	0.105738	0.00356156	0.0207277
Serpina3f	5.78272	0.00311154	-0.0400027	-0.155541	0.00356156	0.0207277
Tnfrsf18	5.77128	0.0031472	0.00858827	0.049588	0.00359383	0.0209032
Melk	5.76774	0.00315834	0.0447419	0.134273	0.0036019	0.0209256
Slc39a6	5.76852	0.00315589	-0.072804	-0.160266	0.00359988	0.0209256
Ptpn18	5.76695	0.00316082	0.0845683	0.156741	0.00360593	0.0209368
Syk	5.76417	0.00316958	0.0999866	0.160792	0.00361198	0.0209596
Slfn2	5.75548	0.00319716	0.0534923	0.138238	0.0036382	0.0210994
Itpripl2	5.7531	0.00320473	0.0500316	0.148372	0.00364223	0.0211105
Gna11	5.74744	0.00322285	-0.0387374	-0.11925	0.00365635	0.0211799
Ccne2	5.74624	0.00322674	0.051272	0.157623	0.00366038	0.0211902
Ckap2l	5.74595	0.00322765	0.0671834	0.0983006	0.0036624	0.0211902
Srsf3	5.73572	0.00326074	-0.124247	-0.148517	0.00368257	0.0212945
Kpna2	5.72703	0.0032891	0.194952	0.137967	0.00371282	0.0214569
Luc7l	5.72225	0.00330481	-0.112285	-0.151683	0.00373097	0.0215492
Drap1	5.7201	0.00331189	0.107273	0.156775	0.00374307	0.0216065
Trim11	5.71531	0.00332775	0.0434763	0.152665	0.00375315	0.0216521
Eif3b	5.71133	0.00334096	0.0439569	0.0916437	0.00376525	0.0217093
Lpar6	5.7089	0.00334907	-0.0442527	-0.160207	0.00377735	0.0217411
Lrp1	5.70925	0.00334789	0.0558888	0.143304	0.00377534	0.0217411
Nabp1	5.70984	0.00334593	0.0623937	0.126845	0.00377332	0.0217411
Abce1	5.70806	0.00335187	-0.134656	-0.151328	0.00378542	0.0217749
Fuca2	5.70245	0.00337067	0.135671	0.1582	0.00380559	0.0218783
Tor3a	5.69436	0.00339795	-0.0523044	-0.131944	0.00383987	0.0220626
Fkbp2	5.69255	0.00340408	0.0678297	0.159884	0.00384794	0.0220833
Smim3	5.69228	0.00340498	-0.0261078	-0.0661761	0.00384794	0.0220833
Pag1	5.69019	0.00341209	0.0645616	0.152464	0.00385197	0.0220937
Ifnar1	5.68561	0.00342771	-0.0647893	-0.143267	0.00386206	0.0221387
Psenen	5.6803	0.00344588	0.0882634	0.133807	0.00387617	0.0222055
Slfn8	5.67939	0.00344902	-0.0261887	-0.158804	0.00387819	0.0222055
Apopt1	5.6775	0.00345552	-0.0747697	-0.147273	0.00388222	0.0222145
Cenpi	5.67735	0.00345604	0.0119723	0.0570692	0.00388424	0.0222145
Ssbp3	5.67565	0.0034619	-0.0471816	-0.14384	0.00389231	0.0222478
Gatad2b	5.6726	0.00347242	-0.0213662	-0.0689002	0.00390642	0.0223157
N4bp2l1	5.66362	0.00350365	0.0658265	0.159669	0.00394071	0.0224986
Sowahc	5.65762	0.00352466	0.0358157	0.159389	0.00398508	0.0227257
Stx7	5.65829	0.0035223	0.129928	0.145814	0.00398306	0.0227257
Rhot1	5.64523	0.00356844	-0.0812531	-0.138134	0.00401734	0.0228966
Acss1	5.64089	0.00358391	-0.0326219	-0.155111	0.00402944	0.0228997
Cbfa2t3	5.64279	0.00357712	-0.0879197	-0.159365	0.00402541	0.0228997
Fam96a	5.64105	0.00358334	0.153255	0.149825	0.00402944	0.0228997
Sh2d5	5.64279	0.00357713	-0.0490841	-0.157452	0.00402541	0.0228997
Zbtb7a	5.64236	0.00357868	0.141003	0.159241	0.00402541	0.0228997
Dstyk	5.63678	0.00359863	-0.0155703	-0.0896835	0.00404154	0.0229291
Myd88	5.63563	0.00360274	0.109448	0.155082	0.00404154	0.0229291
Uqcrfs1	5.63665	0.00359911	0.115258	0.159067	0.00404154	0.0229291
Rnps1	5.63258	0.00361373	-0.195217	-0.158294	0.00405365	0.0229846
Ngrn	5.62592	0.0036378	-0.0295987	-0.108759	0.0040839	0.0231429
Leprotl1	5.61779	0.00366737	0.0822949	0.158723	0.0041323	0.0233904
Mcfd2	5.61824	0.00366575	0.11727	0.158618	0.00413028	0.0233904
Srfbp1	5.61116	0.00369168	-0.0329926	-0.156948	0.00415045	0.0234797
Trmt10a	5.60807	0.00370309	-0.0255906	-0.117561	0.00417263	0.0235918
Hist1h2ap	5.60426	0.00371716	0.0441153	0.13999	0.00418473	0.0236467
BC003965	5.60334	0.0037206	-0.0530659	-0.148634	0.00419078	0.023654
Brix1	5.60332	0.00372065	-0.0552051	-0.144588	0.00419078	0.023654
Atg7	5.59829	0.00373937	0.0640048	0.158099	0.00420893	0.0237138
Clic1	5.59713	0.00374367	0.189132	0.154972	0.00421095	0.0237138
Rnf166	5.5986	0.00373821	0.0426327	0.11823	0.00420692	0.0237138
Xrn1	5.59943	0.0037351	-0.039188	-0.149761	0.0042049	0.0237138
Gm11772	5.59299	0.00375917	-0.023178	-0.148499	0.0042291	0.0238025
Zbp1	5.5866	0.00378317	0.0244085	0.0940811	0.00424524	0.0238798
Cdk5r1	5.58488	0.00378968	0.00256362	0.0225923	0.0042533	0.0238958
Cep120	5.58455	0.00379091	0.0180653	0.0727011	0.00425532	0.0238958
Smchd1	5.58476	0.00379012	-0.0865638	-0.157048	0.0042533	0.0238958
Klc1	5.58338	0.00379535	-0.0666427	-0.155792	0.00425935	0.0239049
Actr5	5.57838	0.0038143	0.014429	0.0792376	0.0042775	0.0239526
Ccbl2	5.57924	0.00381101	-0.0241293	-0.124609	0.0042775	0.0239526
Plk1	5.57995	0.00380832	0.138844	0.14942	0.00427347	0.0239526
Stxbp5	5.5798	0.00380891	0.0350648	0.147356	0.00427549	0.0239526
Tap1	5.57674	0.00382055	-0.0518403	-0.117488	0.0042896	0.0240068
Tmem97	5.57534	0.00382586	-0.102687	-0.158015	0.00429565	0.0240271
Slc25a45	5.55967	0.00388609	-0.109571	-0.157089	0.00437431	0.0244532
Pdap1	5.55847	0.00389075	-0.148846	-0.156195	0.00438036	0.0244732
Zfp777	5.55552	0.00390219	-0.029706	-0.153785	0.00439044	0.0245158
Atrn	5.55177	0.00391682	0.0466904	0.113632	0.00440254	0.0245281
Hhex	5.55262	0.0039135	-0.0478647	-0.141723	0.00440052	0.0245281
Mpc1	5.55526	0.00390322	0.0605702	0.149594	0.00439649	0.0245281
Pde4d	5.55267	0.0039133	0.04503	0.158097	0.00440052	0.0245281
Spryd3	5.54169	0.00395637	0.0263987	0.133115	0.00445498	0.0247897
Stx2	5.5413	0.00395788	0.0449761	0.125504	0.00445699	0.0247897
Utp6	5.54199	0.00395519	-0.0695863	-0.156998	0.00445498	0.0247897
Thyn1	5.53338	0.00398928	-0.0454731	-0.145085	0.00448523	0.0249327
Nhlrc2	5.53174	0.00399577	-0.0502876	-0.153728	0.00449128	0.0249524
Gm17555	5.53032	0.00400143	0.0260928	0.115078	0.00449531	0.024958
Mapk13	5.52983	0.00400341	0.0213328	0.152209	0.00449733	0.024958
Lst1	5.52921	0.00400586	0.088779	0.15524	0.00450136	0.0249664
E130012A19Rik	5.52378	0.00402762	-0.0241348	-0.157189	0.00452153	0.0250643
Tmem126a	5.51834	0.00404949	0.0758462	0.156765	0.0045417	0.025148
Wdr77	5.51834	0.00404952	-0.0738539	-0.156673	0.0045417	0.025148
Eif2d	5.50906	0.00408714	0.0491578	0.156536	0.00457598	0.0253237
Rpl8	5.50577	0.00410057	0.19596	0.14468	0.00459615	0.0254211
Mcm4	5.50349	0.00410989	-0.192264	-0.15105	0.0046022	0.0254373
Msantd3	5.50163	0.00411751	0.0386257	0.15737	0.00460421	0.0254373
mt-Atp6	5.49804	0.00413228	-2.0081	-0.146026	0.00461833	0.0255011
H13	5.49478	0.00414571	-0.111517	-0.113958	0.0046264	0.0255172
Picalm	5.49613	0.00414013	0.0802382	0.116238	0.00462438	0.0255172
H3f3a	5.48899	0.00416973	-0.271376	-0.0993015	0.00464858	0.0256111
Tesk1	5.49031	0.00416423	-0.0270401	-0.153877	0.00464858	0.0256111
Atf3	5.48365	0.00419195	-0.0240276	-0.152506	0.00467077	0.0257127
Cytip	5.48182	0.00419961	0.130729	0.129323	0.0046748	0.0257127
Maged2	5.48254	0.00419659	0.0231967	0.150512	0.00467278	0.0257127
Mbnl2	5.4744	0.00423078	0.105932	0.147764	0.00469698	0.0258204
Tmcc3	5.47121	0.00424425	0.025642	0.128575	0.00471514	0.0259058
Ppp1r3d	5.46957	0.00425123	0.0320956	0.135732	0.00471917	0.0259136
Aebp2	5.46428	0.00427366	-0.0658122	-0.147478	0.00474539	0.0260398
Ppfia4	5.46372	0.00427606	-0.0301485	-0.155328	0.0047474	0.0260398
Mgat5	5.45217	0.00432558	-0.083197	-0.151026	0.00479782	0.0262728
Nxpe2	5.45392	0.00431805	0.0192591	0.156595	0.00479581	0.0262728
Plekha2	5.45203	0.00432618	0.0363029	0.0743299	0.00479782	0.0262728
Prrc2c	5.44336	0.00436372	-0.0551433	-0.155628	0.00483614	0.026468
Ung	5.43957	0.00438024	-0.0572404	-0.146547	0.00485631	0.0265637
Gsto1	5.43534	0.00439874	-0.141183	-0.137538	0.00488051	0.0266814
Scaf8	5.43077	0.00441884	-0.0583693	-0.154395	0.00490269	0.0267731
Tulp4	5.43093	0.00441813	-0.065724	-0.154079	0.00490068	0.0267731
4933434E20Rik	5.43045	0.00442025	-0.00233785	-0.00570954	0.00490673	0.0267804
Mmadhc	5.42533	0.00444285	0.0967007	0.153294	0.00493698	0.0269307
Pak1	5.42419	0.00444789	0.0691479	0.153717	0.00494303	0.0269489
Rbms1	5.41841	0.00447361	0.231431	0.10443	0.00497933	0.0271319
Haao	5.41651	0.0044821	-0.0452096	-0.156035	0.0049874	0.0271609
Bend3	5.40667	0.00452628	-0.0312565	-0.154133	0.00503983	0.0274314
Stat1	5.40475	0.00453493	-0.0783465	-0.155848	0.00505193	0.0274822
Tmem128	5.4037	0.00453967	0.0727998	0.15111	0.00505596	0.027489
Cmpk2	5.40251	0.00454506	-0.0281278	-0.0704132	0.00506	0.0274959
Rbmxl1	5.40217	0.0045466	-0.083599	-0.141353	0.00506403	0.0275027
Cdk17	5.4006	0.00455373	-0.0432765	-0.137949	0.00507412	0.0275424
Tbca	5.40001	0.00455644	0.203385	0.152544	0.00507815	0.0275492
Gfpt1	5.39881	0.00456188	0.0339819	0.121149	0.00508218	0.027556
Pno1	5.39505	0.00457901	-0.0801763	-0.15284	0.00510033	0.0276393
Gm20517	5.39337	0.00458666	0.00303979	0.0382324	0.0051084	0.0276679
Med19	5.39138	0.00459578	-0.0355738	-0.126943	0.00511647	0.0276965
Kdm4a	5.39078	0.00459853	0.0388522	0.114497	0.0051205	0.0277032
Cc2d1a	5.38172	0.00464025	0.0106926	0.0484095	0.00515075	0.0278517
Atp13a2	5.37561	0.00466859	-0.0703873	-0.136272	0.00518302	0.0279608
Kdm6a	5.37756	0.0046595	0.0416515	0.104062	0.00517697	0.0279608
Nqo1	5.37583	0.00466756	0.0162245	0.126633	0.00518302	0.0279608
Smo	5.37449	0.00467381	-0.0312741	-0.155283	0.00518504	0.0279608
Xrcc2	5.37648	0.00466454	-0.0316319	-0.147915	0.005181	0.0279608
Gpr108	5.37243	0.0046834	0.0652519	0.155338	0.00519109	0.0279783
Ccdc40	5.37096	0.00469029	-0.0174242	-0.152099	0.00520722	0.02805
Eif3d	5.36803	0.00470401	-0.0881136	-0.147313	0.00522537	0.0280867
Hgs	5.3689	0.0046999	0.0541411	0.145939	0.00522335	0.0280867
Nqo2	5.36971	0.00469614	0.0546095	0.155087	0.0052173	0.0280867
Slc12a2	5.36916	0.00469872	-0.0373598	-0.154396	0.00522134	0.0280867
Tmem256	5.3646	0.00472013	0.0836993	0.154567	0.00524352	0.028169
Fstl1	5.35931	0.00474505	-0.0181074	-0.141047	0.00527982	0.0283487
Enc1	5.35485	0.00476619	-0.026332	-0.149034	0.00530201	0.0284524
Ten1	5.35021	0.00478828	0.0552486	0.152423	0.00532419	0.028556
Cd200r4	5.34624	0.00480727	0.0349379	0.151422	0.00533831	0.0285961
Flii	5.34537	0.00481145	0.0704977	0.141438	0.00534032	0.0285961
Tgfbr2	5.34558	0.00481044	0.03658	0.150187	0.00534032	0.0285961
Cpa3	5.34356	0.00482013	0.0759307	0.124798	0.00534839	0.0286239
Smek2	5.34258	0.00482484	-0.105489	-0.154887	0.00535243	0.02863
Tor1aip2	5.3385	0.00484449	-0.104374	-0.145921	0.00537864	0.0287547
Mcm5	5.33717	0.00485095	0.112897	0.148493	0.00539074	0.0288039
Akr7a5	5.33222	0.00487495	-0.0388516	-0.15097	0.00542503	0.0289715
E2f5	5.32876	0.00489177	-0.0213044	-0.139734	0.00543511	0.0290097
Acap2	5.32535	0.00490844	0.0590852	0.153689	0.00545528	0.0291017
Fdft1	5.32465	0.00491186	0.0724801	0.132676	0.00546133	0.0291183
Rad21	5.32242	0.00492281	0.178344	0.109739	0.00546738	0.0291349
Gm3604	5.31808	0.00494415	0.0315814	0.153476	0.00548755	0.0292266
Polr2d	5.31313	0.00496858	-0.124092	-0.15436	0.00551578	0.0293612
Dgka	5.30716	0.00499822	0.0270467	0.152879	0.00555007	0.0295279
Med10	5.30545	0.00500678	0.0165336	0.025094	0.00556822	0.0295927
Ssbp4	5.30578	0.0050051	-0.0473229	-0.120074	0.0055662	0.0295927
Fopnl	5.29635	0.00505242	0.0462642	0.152676	0.00562267	0.0298661
Hnrnpl	5.29248	0.00507193	-0.0625308	-0.140746	0.00565292	0.0299946
Tmem9	5.2927	0.00507082	-0.0258407	-0.138372	0.0056509	0.0299946
Bcl7a	5.29143	0.00507722	-0.0333377	-0.153104	0.00565695	0.03
Ppp2r2a	5.28954	0.00508682	-0.0943473	-0.153445	0.00567309	0.0300695
Kti12	5.28728	0.00509828	-0.0647378	-0.154272	0.00568519	0.0301175
mt-Nd4l	5.28626	0.00510348	-0.112662	-0.153647	0.00569124	0.0301335
Cacna1f	5.28526	0.00510854	0.0167084	0.147495	0.00569527	0.0301387
Cdt1	5.28423	0.00511381	-0.115075	-0.145959	0.00570132	0.0301547
AI846148	5.28265	0.00512186	-0.0442758	-0.154175	0.00571745	0.0302239
Fam234b	5.27718	0.00514987	-0.0334773	-0.153239	0.00574771	0.0303676
Fancg	5.27677	0.00515199	0.0107747	0.0441655	0.00575376	0.0303834
Dusp18	5.27417	0.00516532	-0.0194847	-0.15386	0.00576989	0.03042
Gtf3c4	5.27347	0.00516897	-0.0556174	-0.153287	0.00576989	0.03042
Oser1	5.27404	0.00516599	0.0194164	0.0402841	0.00576989	0.03042
2010204K13Rik	5.27121	0.00518059	-0.0161619	-0.151881	0.00578199	0.0304676
Tpp1	5.26353	0.00522043	0.129753	0.153855	0.00581829	0.0306426
Nutf2	5.26033	0.00523712	-0.0824075	-0.153556	0.00584451	0.0307586
Trmt1	5.26001	0.00523876	-0.0430511	-0.150039	0.00584653	0.0307586
Pafah1b3	5.25707	0.00525416	-0.0456315	-0.137851	0.00586064	0.0308165
Abcd1	5.25522	0.00526386	0.0695553	0.153647	0.00587476	0.0308744
Cwc15	5.24557	0.00531471	-0.105259	-0.14901	0.00592518	0.0311064
Tnf	5.2464	0.00531035	0.0561264	0.111284	0.00592316	0.0311064
Amz1	5.24399	0.00532311	-0.0206755	-0.114494	0.00593526	0.0311099
Camkk2	5.2442	0.00532198	-0.13101	-0.151483	0.00593526	0.0311099
Mtmr3	5.24335	0.00532649	0.107326	0.150879	0.00593526	0.0311099
Cables1	5.23455	0.00537342	-0.0222777	-0.152351	0.00599375	0.0313833
Cst3	5.23492	0.00537142	0.323624	0.152795	0.00599173	0.0313833
Ndufaf4	5.23391	0.00537685	-0.0773684	-0.152567	0.00600787	0.0314406
Samd9l	5.23071	0.00539403	-0.0141775	-0.033949	0.00601795	0.0314768
Eif4g2	5.22959	0.00540006	-0.484984	-0.143808	0.006024	0.0314918
Arpc2	5.22674	0.00541542	0.281383	0.151994	0.00604215	0.0315701
Dap3	5.21179	0.00549675	-0.0461518	-0.126995	0.00616114	0.0321748
Farsa	5.21014	0.0055058	-0.0976458	-0.153098	0.00616719	0.0321895
Maea	5.20902	0.00551194	0.0956501	0.138759	0.00617727	0.0322251
Atp5d	5.20499	0.00553411	0.133262	0.140055	0.00620349	0.0323449
Rab7	5.20327	0.0055436	0.12667	0.135982	0.00621357	0.0323805
Nudcd1	5.20141	0.00555389	-0.078047	-0.147991	0.00623172	0.032458
Dcps	5.19523	0.00558821	-0.0535874	-0.114674	0.00627609	0.0326205
Dctpp1	5.19652	0.00558105	-0.0903023	-0.14862	0.00627004	0.0326205
Smurf2	5.19617	0.00558301	0.0230413	0.152231	0.00627206	0.0326205
Trim45	5.19523	0.00558825	0.0162751	0.150359	0.00627609	0.0326205
Fyb	5.19359	0.00559736	-0.0870895	-0.146635	0.00628013	0.0326244
Casp7	5.19279	0.00560187	0.0647187	0.141457	0.00628819	0.0326492
Ppp1r21	5.18933	0.0056212	0.104103	0.15165	0.00631239	0.0327406
Wdr18	5.18903	0.00562288	-0.0584119	-0.152516	0.00631239	0.0327406
Rcor2	5.18516	0.00564459	-0.0152623	-0.148479	0.00633861	0.0328594
Ogt	5.18213	0.00566169	-0.0814307	-0.152662	0.00636079	0.0329572
Bsn	5.17678	0.00569196	-0.0167955	-0.130546	0.00640516	0.0331697
Ccdc109b	5.17378	0.00570901	0.0357625	0.152627	0.00642936	0.0332777
Atp2a2	5.16935	0.00573427	-0.0488413	-0.048196	0.00646365	0.0334377
Hspb6	5.16841	0.00573966	0.0283804	0.152463	0.0064697	0.0334445
Usp18	5.16779	0.00574321	-0.0480085	-0.140922	0.00647172	0.0334445
Hyal1	5.16715	0.00574687	-0.0140824	-0.151728	0.00647978	0.0334687
Pex5	5.16368	0.00576681	-0.0808032	-0.152464	0.006506	0.0335867
Mcm3ap	5.16272	0.00577228	0.0455072	0.140223	0.00651205	0.0336004
Rps25	5.16169	0.00577824	-0.475441	-0.135206	0.00652415	0.0336279
Stradb	5.16206	0.00577608	0.027273	0.126311	0.00652213	0.0336279
Coasy	5.15876	0.00579514	-0.0590584	-0.125924	0.00655238	0.0337558
Fads1	5.15644	0.00580853	-0.118242	-0.139217	0.00657054	0.0338142
Lrrc57	5.15607	0.00581071	0.0721545	0.149263	0.00657054	0.0338142
Ncoa1	5.15471	0.00581856	-0.0487486	-0.152285	0.00658062	0.0338485
Acbd3	5.15238	0.00583213	0.0193252	0.0634348	0.00659272	0.0338756
Znrd1	5.15221	0.00583309	-0.0402627	-0.146346	0.00659272	0.0338756
Wnk1	5.14927	0.0058502	-0.0808324	-0.145878	0.00661289	0.0339617
Gpr180	5.14273	0.00588851	-0.0440542	-0.114073	0.00665524	0.0341615
Elf1	5.13509	0.0059335	-0.0739854	-0.143312	0.00670969	0.0344232
Itgal	5.12841	0.00597314	0.0327654	0.0563562	0.00673994	0.0345605
Gnptab	5.12227	0.00600983	-0.0705277	-0.148458	0.00677019	0.0346977
Igf2bp2	5.11586	0.00604832	-0.0126455	-0.142778	0.00679641	0.034814
Aga	5.10998	0.0060839	0.0339528	0.125239	0.00682263	0.0348763
Camk2d	5.11074	0.0060793	0.0377116	0.125587	0.00682263	0.0348763
Ccnc	5.11109	0.00607718	0.0369219	0.125772	0.00682263	0.0348763
Hmha1	5.11058	0.00608029	0.0823689	0.146997	0.00682263	0.0348763
Fam21	5.1066	0.00610446	0.107552	0.149242	0.00684885	0.0349923
Ripk2	5.10245	0.00612973	0.0460571	0.151428	0.00687506	0.0351081
Reps1	5.10126	0.00613704	-0.052004	-0.149176	0.00688111	0.0351209
Arid5b	5.0993	0.00614901	-0.0223988	-0.106057	0.00689523	0.0351749
Fam114a1	5.09719	0.00616199	0.0204265	0.147468	0.00690531	0.0351901
Klhl23	5.09768	0.00615896	0.0178217	0.103292	0.00690531	0.0351901
H2afz	5.09288	0.00618852	0.343329	0.145763	0.0069275	0.0352851
Ppp4r1	5.09093	0.00620058	0.0315885	0.141322	0.00693758	0.0353002
Pus10	5.09088	0.00620086	-0.0436761	-0.146569	0.00693758	0.0353002
Mkl1	5.08858	0.0062151	0.0291517	0.131425	0.00695372	0.0353641
Sdccag3	5.08722	0.00622353	0.018635	0.0437784	0.00696178	0.035387
Ctu1	5.08012	0.00626773	-0.0272512	-0.118146	0.00699405	0.0355146
Spn	5.0804	0.00626602	-0.121018	-0.1375	0.00699405	0.0355146
Lars2	5.07568	0.00629558	-0.0467215	-0.148909	0.00703237	0.0356909
Manf	5.07422	0.00630471	-0.146231	-0.0687569	0.00705052	0.0357647
Mcm6	5.07239	0.00631626	-0.181439	-0.136746	0.00705657	0.035769
Shisa5	5.07178	0.00632006	0.0177666	0.0206632	0.00705859	0.035769
Pop5	5.06998	0.0063314	0.0426349	0.108443	0.00707472	0.0358325
Tmem248	5.06907	0.00633716	0.0258959	0.0436466	0.00708279	0.035855
Arhgdia	5.06798	0.00634409	0.171423	0.150087	0.00709489	0.035898
Akt1	5.0643	0.00636741	-0.187955	-0.150898	0.00711707	0.0359735
Gmnn	5.06461	0.00636539	0.08881	0.149575	0.00711505	0.0359735
Tacstd2	5.06347	0.00637265	0.029389	0.130873	0.00712917	0.0360163
Acox1	5.06155	0.00638486	0.0607459	0.146125	0.00713926	0.0360489
Ocel1	5.05981	0.00639592	0.0293433	0.150385	0.00714732	0.0360529
Qtrtd1	5.05994	0.00639512	-0.03025	-0.147366	0.00714732	0.0360529
9930012K11Rik	5.0576	0.00641008	0.0193023	0.146515	0.00716749	0.0361362
Mtap	5.05325	0.00643793	-0.0631724	-0.142511	0.00718766	0.0362195
Ppp1r10	5.05182	0.00644711	-0.0636174	-0.147331	0.00719371	0.0362316
Pnn	5.04866	0.00646744	-0.0795941	-0.149928	0.00721791	0.036335
Commd6	5.04054	0.00651998	0.0513623	0.150648	0.00726631	0.0365601
Cpt1a	5.03797	0.00653673	0.0446896	0.107839	0.00727841	0.0366024
Inip	5.03242	0.00657303	-0.037707	-0.10997	0.00730261	0.0367055
Tma16	5.02699	0.00660865	-0.0321054	-0.121758	0.00735505	0.0369504
Mapk8	5.02007	0.00665446	-0.0515466	-0.140702	0.0073974	0.0371443
Panx1	5.01877	0.00666305	0.072761	0.136905	0.0074095	0.0371862
Celf1	5.01357	0.00669768	-0.0718924	-0.139103	0.00742765	0.0372396
Ube2e1	5.01466	0.00669045	-0.0730626	-0.142777	0.00742765	0.0372396
Neurl3	5.01068	0.00671703	-0.0328778	-0.145787	0.00745387	0.0373522
Elf4	5.00928	0.00672643	0.05027	0.139583	0.00746798	0.037404
Agtpbp1	5.00316	0.00676755	0.045905	0.140884	0.00751034	0.0375972
Pi16	4.99927	0.0067939	0.0321197	0.109798	0.00753252	0.0376892
AI467606	4.98561	0.00688705	0.0690051	0.146003	0.00764949	0.0382552
Fam63a	4.97756	0.00694249	0.0584635	0.117586	0.00770596	0.0385181
Xab2	4.97642	0.0069504	0.0275725	0.135872	0.00771604	0.0385491
Aars2	4.97223	0.0069795	-0.0285203	-0.144162	0.00774428	0.0386318
Igbp1	4.97295	0.00697449	-0.0651088	-0.148956	0.00773823	0.0386318
Ppm1g	4.97254	0.00697736	-0.130501	-0.145186	0.00774226	0.0386318
Atp6v1f	4.9708	0.0069895	0.0914215	0.072399	0.00775436	0.0386626
Mrps26	4.96731	0.00701382	-0.024842	-0.0572936	0.00778058	0.0387739
Fzd4	4.96484	0.00703111	0.0149342	0.149351	0.00780276	0.0388649
Ctr9	4.96278	0.00704556	-0.0501403	-0.141311	0.00781486	0.0388861
Max	4.96293	0.00704454	-0.139196	-0.147429	0.00781486	0.0388861
Cyb5r3	4.96044	0.00706208	-0.0831035	-0.148831	0.00783705	0.0389574
Wdr4	4.96047	0.00706182	-0.0468639	-0.148832	0.00783705	0.0389574
Fundc1	4.95911	0.0070714	-0.0675387	-0.141685	0.00785318	0.039018
Col4a3bp	4.95286	0.00711559	0.0493898	0.13788	0.00789352	0.0391988
Ndufaf1	4.94835	0.00714768	-0.017124	-0.119481	0.0079278	0.0393493
[truncated: 125 more rows]
