# Supplementary material for: Deciphering Cell Fate and Clonal Dynamics via Integrative Single-Cell Lineage Modeling
Source: Research Square preprint supplement (doi:10.21203/rs.3.rs-7510946/v1), 2025-09-24
Supplement: Supplementary file 4 [file 954941305e9076b8c5e1a90f.xlsx]

## Sheet: Sheet1
Description: This table records the gene list for different functional modules in T cells
activation	cytotoxicity	exhaustion	proliferation	stemness	migration	memory	survival	senescence
CD69	GZMB	PDCD1	MKI67	TCF7	CCR7	CCR7	BCL2	KLRG1
IL2RA	GZMA	CTLA4	PCNA	LEF1	SELL	SELL	BCL2L1	B3GAT1
CD40LG	GZMK	LAG3	TOP2A	IL7R	CXCR3	CD27	MCL1	ZEB2
EGR1	GZMH	TIGIT	BIRC5	SELL	CXCR6	CD28	IL7R	CX3CR1
FOS	PRF1	HAVCR2	TYMS	CCR7	S1PR1	LEF1	STAT5A	EOMES
JUN	KLRK1	ENTPD1	MCM2	BACH2	CXCR4	TCF7	IL15RA	MT-CO1
NR4A1	KLRD1	TOX	MCM4	CXCR5	ITGAE	GZMK	STAT3	MT-ND4
CD38	GNLY	TOX2	CDK1	SLAMF6	CD69	CX3CR1	SOCS1	HSPA9
IL2	NKG7	EOMES	CCNB1		ZFP683	PRF1
TNF	FGFBP2	NR4A1	AURKB		RUNX3	IFNG
IFNG	FAS	NR4A2	CDC20		ITGB1	EOMES
IL21	FASLG	NFATC1			ITGAL	CD69
CSF2	TNFSF10	BATF			SPN	ITGAE
CD28	CCL3	PRDM1				ZFP683
ICOS	CCL4	CXCL13				RUNX3
TNFRSF4	CXCL10	XCL1				CXCR6
TNFRSF9		CXCR6
