# Supplementary material for: Deciphering Cell Fate and Clonal Dynamics via Integrative Single-Cell Lineage Modeling
Source: Research Square preprint supplement (doi:10.21203/rs.3.rs-7510946/v1), 2025-09-24
Supplement: Supplementary file 5 [file c4292bee98eea5d362acdcdc.xlsx]

## Sheet: Sheet1
Description: This table records the significant differentially expressed genes between profile 1, 4 and 8 in the GZMK+ tem population
gene	stat	pval	mean_diff	cohen	pcali	padj	profile
HLA-DRA	32.9604	4.99224e-15	1.41657	1.40437	0	0	profile_1
MIR4435-2HG	554.824	4.01917e-238	0.491209	0.78146	0	0	profile_1
LDLRAD4	211.619	4.16298e-92	0.51502	0.724885	0	0	profile_1
SOX4	382.414	4.18661e-165	0.203891	0.684129	0	0	profile_1
GNA15	907.33	0	0.204222	0.669943	0	0	profile_1
CD38	637.161	9.27673e-273	0.295911	0.635755	0	0	profile_1
GALNT2	951.377	0	0.314928	0.63281	0	0	profile_1
NPDC1	12.5398	3.5965e-06	0.156749	0.631434	1.75953e-05	0.0008	profile_1
CLDN10	344.523	5.73864e-149	0.10605	0.617071	0	0	profile_1
ZBTB32	463.341	1.84169e-199	0.209778	0.599975	0	0	profile_1
CENPF	375.837	2.63221e-162	0.294701	0.597942	0	0	profile_1
AGPAT5	552.214	5.06512e-237	0.22452	0.587983	0	0	profile_1
AIF1	33.5748	2.70348e-15	0.192555	0.550787	0	0	profile_1
LRRN3	752.731	4.0019317313141e-321	0.145263	0.535977	0	0	profile_1
RUNX2	412.37	7.71e-178	0.162759	0.519193	0	0	profile_1
PDE4DIP	25.9673	5.37645e-12	0.263465	0.515424	0	0	profile_1
EPB41L3	181.226	4.78211e-79	0.0789143	0.506647	0	0	profile_1
ICOS	146.468	4.38227e-64	0.392346	0.499639	0	0	profile_1
TTN	179.549	2.51569e-78	0.200206	0.483389	0	0	profile_1
HLA-DMB	30.0603	9.02843e-14	0.173348	0.467753	0	0	profile_1
BEX3	66.9531	9.44914e-30	0.0861551	0.44798	0	0	profile_1
TIAM1	194.957	5.9806e-85	0.0810975	0.447129	0	0	profile_1
LGALS3BP	45.7685	1.40501e-20	0.103533	0.446184	0	0	profile_1
IL9R	285.657	7.82671e-124	0.14632	0.445248	0	0	profile_1
CPNE2	40.3394	3.16238e-18	0.114951	0.429266	0	0	profile_1
MIR181A1HG	131.864	8.63938e-58	0.0839769	0.416532	0	0	profile_1
CTLA4	1254.27	0	0.190078	0.4134	0	0	profile_1
APOBEC3H	135.939	1.51204e-59	0.201659	0.393568	0	0	profile_1
SUSD3	70.2347	3.59334e-31	0.172321	0.375607	0	0	profile_1
PKIA	213.951	4.15212e-93	0.0805409	0.366362	0	0	profile_1
GPR25	146.288	5.2384e-64	0.0535593	0.364578	0	0	profile_1
CDCA7	99.3947	8.90419e-44	0.070119	0.361392	0	0	profile_1
NBL1	27.7159	9.37967e-13	0.141867	0.361363	0	0	profile_1
POU3F1	12.6829	3.11736e-06	0.0638479	0.357953	1.6129e-05	0.000740741	profile_1
APP	70.2554	3.52e-31	0.0600134	0.348815	0	0	profile_1
TYMS	90.8164	4.5282e-40	0.0982787	0.34815	0	0	profile_1
GOLGA8A	26.1171	4.62944e-12	0.10013	0.346825	0	0	profile_1
BCAT1	98.1057	3.20914e-43	0.0568344	0.345276	0	0	profile_1
MYL6B	114.219	3.53784e-50	0.0690927	0.331472	0	0	profile_1
TMEM155	126.141	2.53898e-55	0.0497093	0.314174	0	0	profile_1
TPX2	180.328	1.16402e-78	0.0671785	0.313294	0	0	profile_1
HSH2D	24.3672	2.65731e-11	0.0881628	0.310671	0	0	profile_1
LRRC2	105.772	1.56737e-46	0.0642493	0.309268	0	0	profile_1
ZNF683	2666.8	0	0.184204	0.306149	0	0	profile_1
BUB1B	135.547	2.23122e-59	0.0406205	0.304942	0	0	profile_1
AC079341.1	93.1519	4.43289e-41	0.0352757	0.304785	0	0	profile_1
MN1	51.3221	5.52241e-23	0.0421444	0.295451	0	0	profile_1
CPNE7	263.966	1.49851e-114	0.115997	0.292658	0	0	profile_1
ACP5	114.669	2.2611e-50	0.115373	0.287002	0	0	profile_1
IFI27	74.8786	3.52069e-33	0.07316	0.282084	0	0	profile_1
PRKAR1B	22.7289	1.36476e-10	0.074482	0.281848	0	0	profile_1
SV2C	58.7821	3.25062e-26	0.0213208	0.280299	0	0	profile_1
CHN1	47.6642	2.12068e-21	0.0755774	0.277826	0	0	profile_1
CCNA2	46.1415	9.68486e-21	0.0469586	0.268857	0	0	profile_1
CD70	18.2038	1.25344e-08	0.103742	0.268237	1.46628e-06	7.35294e-05	profile_1
CD248	77.0954	3.87099e-34	0.0204491	0.266789	0	0	profile_1
MKI67	61.7038	1.76695e-27	0.0419781	0.261329	0	0	profile_1
ASB2	91.5179	2.25309e-40	0.0693622	0.261302	0	0	profile_1
THY1	51.4281	4.96813e-23	0.0205136	0.260545	0	0	profile_1
JAG1	336.425	1.62921e-145	0.0259197	0.25771	0	0	profile_1
TRIB1	80.5853	1.1985e-35	0.0537563	0.25355	0	0	profile_1
BEND4	93.986	1.9332e-41	0.0257303	0.252914	0	0	profile_1
AL157402.2	16.7731	5.23417e-08	0.0718689	0.251736	1.46628e-06	7.35294e-05	profile_1
KIF23	112.19	2.65679e-49	0.0483032	0.249243	0	0	profile_1
RTKN2	21.5123	4.60009e-10	0.0444458	0.248003	1.46628e-06	7.35294e-05	profile_1
C3orf14	23.809	4.64053e-11	0.0367925	0.245098	0	0	profile_1
MYO5B	174	6.13294e-76	0.0445763	0.244656	0	0	profile_1
SLC27A2	91.0824	3.47544e-40	0.048152	0.241495	0	0	profile_1
CCDC141	36.4716	1.50061e-16	0.0625315	0.239981	0	0	profile_1
TRIM59	6.13224	0.00217393	0.0620492	0.239938	0.000328446	0.0114286	profile_1
CLIC5	16.4909	6.93881e-08	0.0767568	0.235362	1.46628e-06	7.35294e-05	profile_1
RENBP	18.3907	1.03999e-08	0.0307368	0.232463	1.46628e-06	7.35294e-05	profile_1
GRAMD1B	55.8446	6.07733e-25	0.105842	0.231165	0	0	profile_1
LMCD1	60.4336	6.26669e-27	0.0341731	0.224624	0	0	profile_1
CSGALNACT1	53.41	6.88565e-24	0.0361528	0.223741	0	0	profile_1
SCUBE1	299.155	1.32812e-129	0.0509953	0.221788	0	0	profile_1
CD109	145.349	1.32965e-63	0.0240844	0.220037	0	0	profile_1
MCAM	70.0344	4.38732e-31	0.0170413	0.21849	0	0	profile_1
ITGAE	50.6384	1.09202e-22	0.135513	0.216927	0	0	profile_1
MIR155HG	203.658	1.09271e-88	0.123599	0.216864	0	0	profile_1
HMGB3	22.2607	2.17849e-10	0.0538782	0.214146	1.46628e-06	7.35294e-05	profile_1
AADACL2-AS1	39.0769	1.11459e-17	0.010543	0.209982	0	0	profile_1
PTPRK	24.712	1.88322e-11	0.029994	0.204624	0	0	profile_1
HAPLN3	11.0046	1.66799e-05	0.0463897	0.203603	3.51906e-05	0.00148148	profile_1
LINC00426	17.9005	1.697e-08	0.0749767	0.200959	1.46628e-06	7.35294e-05	profile_1
MLC1	43.5362	1.30254e-19	0.0145291	0.199814	0	0	profile_1
KNL1	29.188	2.15695e-13	0.0397242	0.199065	0	0	profile_1
CDCA7L	40.4054	2.96076e-18	0.0189451	0.199014	0	0	profile_1
ITGA2	161.575	1.36482e-70	0.024665	0.197667	0	0	profile_1
BUB1	37.15	7.62494e-17	0.0330504	0.193279	0	0	profile_1
ADCY3	7.46943	0.000571117	0.036251	0.189334	0.000167155	0.00616216	profile_1
ENTPD1	197.713	3.91208e-86	0.0334811	0.18912	0	0	profile_1
MYO1E	126.638	1.54911e-55	0.0178742	0.185097	0	0	profile_1
AP002884.1	40.6568	2.30375e-18	0.0148125	0.184786	0	0	profile_1
PCLAF	42.5167	3.60195e-19	0.0202921	0.184451	0	0	profile_1
ANLN	8.04975	0.000319745	0.0190801	0.181275	0.000120235	0.00454294	profile_1
C1QB	14.8562	3.5532e-07	0.0299769	0.180243	5.8651e-06	0.00027972	profile_1
G0S2	71.2795	1.26913e-31	0.0249477	0.17974	0	0	profile_1
FZD6	21.6552	3.98824e-10	0.0170693	0.178509	1.46628e-06	7.35294e-05	profile_1
CXCL8	45.7031	1.49967e-20	0.0241921	0.176648	0	0	profile_1
CLIP3	33.9578	1.84464e-15	0.015696	0.171921	0	0	profile_1
GAS2L1	49.7875	2.55138e-22	0.013305	0.171563	0	0	profile_1
TMEM14C	96.588	1.45229e-42	0.0797574	0.169861	0	0	profile_1
NPTX2	4.84577	0.00786657	0.00926122	0.168999	0.000612903	0.0195327	profile_1
TTTY14	31.5556	2.02921e-14	0.0146337	0.16796	0	0	profile_1
ASPM	31.2613	2.722e-14	0.0236922	0.16525	0	0	profile_1
LIMS2	35.5979	3.58894e-16	0.0116398	0.164783	0	0	profile_1
STAP1	49.8299	2.44572e-22	0.00994448	0.164146	0	0	profile_1
PARD6G	125.674	4.03824e-55	0.0465315	0.163287	0	0	profile_1
PLOD1	30.4674	6.01311e-14	0.0233166	0.16041	0	0	profile_1
ALPL	44.3692	5.67395e-20	0.0166402	0.160302	0	0	profile_1
LINC01684	19.7924	2.56393e-09	0.019957	0.160157	1.46628e-06	7.35294e-05	profile_1
FOXB1	28.2273	5.62894e-13	0.00999776	0.159603	0	0	profile_1
BFSP2-AS1	34.0197	1.73416e-15	0.00774634	0.159526	0	0	profile_1
C1QC	2.48287	0.0835169	0.0265412	0.159473	0.00179619	0.0498374	profile_1
PGBD1	36.4929	1.46906e-16	0.0166077	0.158623	0	0	profile_1
FHL2	9.08741	0.000113335	0.0146387	0.158258	7.91789e-05	0.00310345	profile_1
IGHV1-3	50.8599	8.75562e-23	0.0564369	0.156583	0	0	profile_1
LINC02055	12.6359	3.26732e-06	0.00840941	0.154885	1.75953e-05	0.0008	profile_1
SMAD1	34.2219	1.41718e-15	0.0064659	0.147825	0	0	profile_1
FUT8	21.7644	3.57607e-10	0.0515456	0.147677	1.46628e-06	7.35294e-05	profile_1
MIR3142HG	14.7063	4.1276e-07	0.0186768	0.14572	5.8651e-06	0.00027972	profile_1
CERS6	29.0446	2.48898e-13	0.0204095	0.145357	0	0	profile_1
LAMB3	15.1551	2.63585e-07	0.00615539	0.142263	2.93255e-06	0.000144404	profile_1
FOXP3	8.62793	0.000179398	0.0126004	0.140673	8.65103e-05	0.00332394	profile_1
CD80	49.2247	4.47226e-22	0.0142017	0.140458	0	0	profile_1
SH3PXD2A	6.35561	0.00173888	0.0191509	0.140368	0.000302053	0.0106186	profile_1
SMOX	7.328	0.000657842	0.0123931	0.139679	0.000175953	0.0064	profile_1
ZC2HC1A	22.8665	1.18952e-10	0.0119389	0.139544	0	0	profile_1
FOXM1	21.9902	2.85425e-10	0.00910851	0.137844	1.46628e-06	7.35294e-05	profile_1
AL096865.1	12.3588	4.30952e-06	0.012934	0.136854	2.05279e-05	0.000924092	profile_1
MPZL2	19.3015	4.18664e-09	0.00671966	0.136815	1.46628e-06	7.35294e-05	profile_1
C1QA	22.6365	1.49676e-10	0.0192578	0.136213	0	0	profile_1
CKAP2L	15.7946	1.39128e-07	0.0175106	0.135782	1.46628e-06	7.35294e-05	profile_1
IL7	51.2835	5.73875e-23	0.0129929	0.133218	0	0	profile_1
LINC02195	85.3005	1.0966e-37	0.0166762	0.133097	0	0	profile_1
AC098613.1	13.7414	1.08241e-06	0.0180843	0.131287	7.33138e-06	0.000346021	profile_1
MSX2	5.14243	0.00584765	0.00542968	0.129434	0.000533724	0.0173333	profile_1
AMZ1	12.0885	5.6459e-06	0.00956637	0.129122	2.34604e-05	0.00104918	profile_1
AL590006.1	15.891	1.26362e-07	0.0129864	0.12911	1.46628e-06	7.35294e-05	profile_1
KIF7	21.2674	5.8753e-10	0.00716788	0.127661	1.46628e-06	7.35294e-05	profile_1
KMO	6.52753	0.0014643	0.00649152	0.124889	0.000282991	0.01	profile_1
CXorf21	11.8331	7.28797e-06	0.00622271	0.124882	2.49267e-05	0.00110032	profile_1
CHST2	11.2315	1.32962e-05	0.0145705	0.124392	3.22581e-05	0.00139241	profile_1
CDK1	60.0433	9.24669e-27	0.0372887	0.12419	0	0	profile_1
NHS	65.6127	3.59306e-29	0.0101262	0.123088	0	0	profile_1
AC245595.1	11.1199	1.4865e-05	0.013344	0.122589	3.37243e-05	0.00144654	profile_1
METTL8	2.48905	0.0830025	0.0304354	0.121566	0.00178886	0.0497959	profile_1
NAALADL1	49.4211	3.67686e-22	0.021033	0.120888	0	0	profile_1
GPR34	41.5121	9.81381e-19	0.00979567	0.120004	0	0	profile_1
S1PR3	23.8983	4.24472e-11	0.00570253	0.118993	0	0	profile_1
OTUB2	40.5417	2.58435e-18	0.0104442	0.118573	0	0	profile_1
SERPINA1	12.1199	5.47185e-06	0.00716769	0.118334	2.34604e-05	0.00104918	profile_1
ATP10D	97.4821	5.96745e-43	0.0351489	0.117302	0	0	profile_1
SRGAP3	304.764	5.32977e-132	0.0293721	0.114942	0	0	profile_1
C1orf53	11.4387	1.08086e-05	0.00562406	0.113324	3.22581e-05	0.00139241	profile_1
RYR2	142.479	2.29224e-62	0.0179534	0.112165	0	0	profile_1
CARD17	29.82	1.14768e-13	0.0175174	0.111518	0	0	profile_1
AC108488.1	3.51327	0.0298092	0.00560526	0.111118	0.0011217	0.0331169	profile_1
TUBB3	5.04346	0.00645584	0.0157002	0.110594	0.00056305	0.018156	profile_1
AURKB	7.37851	0.000625456	0.00477022	0.109523	0.000175953	0.0064	profile_1
CD163	28.9731	2.67316e-13	0.0061963	0.108997	0	0	profile_1
MICU3	3.842	0.0214593	0.0053178	0.10811	0.000961877	0.0288987	profile_1
IQSEC3	3.23492	0.0393747	0.00834685	0.10774	0.00128299	0.0373134	profile_1
TBXA2R	5.43639	0.00435867	0.00393829	0.107709	0.000456012	0.0150242	profile_1
BEX1	9.26132	9.52517e-05	0.00559032	0.107442	7.77126e-05	0.00306358	profile_1
TRDV2	9.95459	4.7637e-05	0.00583119	0.106599	5.71848e-05	0.00232836	profile_1
MCTP1	4.49288	0.0111945	0.00692988	0.106239	0.000715543	0.0224885	profile_1
NDC80	41.9075	6.61447e-19	0.0261071	0.105724	0	0	profile_1
RGS13	11.8291	7.31698e-06	0.0135456	0.104032	2.49267e-05	0.00110032	profile_1
CBX8	9.51288	7.40758e-05	0.0207278	0.103862	6.74487e-05	0.00269795	profile_1
LINC00539	42.0579	5.69262e-19	0.0197507	0.100469	0	0	profile_1
ZNF788P	4.83043	0.00798811	0.0055657	0.100231	0.00061437	0.0195338	profile_1
XCL1	1197.3	0	1.38403	1.40401	0	0	profile_4
TYROBP	2736.37	0	0.607438	1.22599	0	0	profile_4
HOPX	750.791	4.6990583575961e-320	0.616246	0.948268	0	0	profile_4
KRT86	1607.45	0	0.433283	0.838723	0	0	profile_4
ATP1B1	121.251	3.32102e-53	0.403015	0.814843	0	0	profile_4
CXCR6	1080.25	0	0.71229	0.795352	0	0	profile_4
LINC01871	575.486	1.129e-246	0.579573	0.73347	0	0	profile_4
FRMD4B	282.756	1.48811e-122	0.44794	0.724512	0	0	profile_4
SPRY1	792.118	0	0.288678	0.707212	0	0	profile_4
KLRC1	204.784	3.75836e-89	0.187489	0.666249	0	0	profile_4
TRGV2	31.9123	1.42287e-14	0.283718	0.639707	0	0	profile_4
CD40LG	797.497	0	0.155738	0.623302	0	0	profile_4
KRT81	387.689	2.81294e-167	0.090372	0.599596	0	0	profile_4
TMEM273	380.386	3.57384e-164	0.173818	0.579862	0	0	profile_4
NCR3	435.101	2.12297e-187	0.176191	0.54886	0	0	profile_4
CD9	125.639	4.25525e-55	0.123143	0.48015	0	0	profile_4
EGFL6	241.778	5.1156e-105	0.0382626	0.446061	0	0	profile_4
SERPINE2	283.973	4.49189e-123	0.0974443	0.439413	0	0	profile_4
PHLDA1	445.469	8.57803e-192	0.265446	0.436978	0	0	profile_4
STX3	68.3973	2.25295e-30	0.117993	0.434906	0	0	profile_4
AL136987.1	60.5148	5.80281e-27	0.128114	0.42711	0	0	profile_4
CLNK	202.447	3.78649e-88	0.037892	0.423101	0	0	profile_4
ANKRD28	248.635	5.91066e-108	0.140998	0.420468	0	0	profile_4
ZBTB16	47.0769	3.81883e-21	0.0744089	0.367755	0	0	profile_4
GFI1	51.0719	7.10819e-23	0.123374	0.325189	0	0	profile_4
TGFBI	72.805	2.79335e-32	0.0602484	0.320118	0	0	profile_4
RBPJ	641.997	1.34728e-274	0.198219	0.312752	0	0	profile_4
SAMSN1-AS1	65.7109	3.2739e-29	0.0146325	0.306491	0	0	profile_4
IL4	65.4075	4.42919e-29	0.0361851	0.30083	0	0	profile_4
AL158071.4	71.0154	1.6603e-31	0.0561688	0.291464	0	0	profile_4
TM6SF1	110.336	1.70108e-48	0.0461592	0.277596	0	0	profile_4
ST8SIA6	36.4872	1.47955e-16	0.0484964	0.275177	0	0	profile_4
RGS9	98.6564	1.87595e-43	0.0880148	0.264646	0	0	profile_4
ITGA1	505.759	2.72947e-217	0.14449	0.264023	0	0	profile_4
LYN	15.9621	1.17729e-07	0.0453379	0.262052	7.36648e-06	0.0003663	profile_4
COLGALT2	15.9358	1.20865e-07	0.0420424	0.258177	7.36648e-06	0.0003663	profile_4
CRNDE	46.5328	6.57073e-21	0.0212018	0.255548	0	0	profile_4
LZTS1	47.6154	2.23212e-21	0.0335577	0.252695	0	0	profile_4
MMP25	23.6149	5.63681e-11	0.0220451	0.237289	0	0	profile_4
AC109779.1	57.1198	1.71083e-25	0.0148509	0.230929	0	0	profile_4
LAT2	86.912	2.22378e-38	0.0239333	0.221196	0	0	profile_4
CDKN2B	4.37463	0.0125996	0.0510691	0.220332	0.000760221	0.0230872	profile_4
IL12RB2	12.1976	5.06392e-06	0.0282157	0.212108	2.5046e-05	0.00111842	profile_4
RAPGEF5	41.8843	6.78237e-19	0.0156473	0.211334	0	0	profile_4
SHISA4	24.1948	3.15866e-11	0.0209011	0.209984	0	0	profile_4
RGS18	55.3061	1.04317e-24	0.0106956	0.20991	0	0	profile_4
PPARG	127.069	1.02849e-55	0.0220992	0.207159	0	0	profile_4
CTSH	70.6701	2.34194e-31	0.0397632	0.207009	0	0	profile_4
ITGAM	76.4072	7.73259e-34	0.028244	0.206756	0	0	profile_4
SYNGR3	19.5491	3.27044e-09	0.0279436	0.203624	1.4733e-06	8.19672e-05	profile_4
HTRA1	57.6599	9.98602e-26	0.0190851	0.199113	0	0	profile_4
CCR1	78.576	8.92275e-35	0.0339196	0.199056	0	0	profile_4
CASS4	129.248	1.18218e-56	0.0512034	0.198763	0	0	profile_4
GAS6	6.06286	0.00233015	0.0210349	0.196289	0.000359484	0.0120792	profile_4
LINC00092	27.3443	1.36047e-12	0.015941	0.183032	0	0	profile_4
LRRC63	23.2505	8.11104e-11	0.0215787	0.181418	1.4733e-06	8.19672e-05	profile_4
TIMP2	29.0907	2.3793e-13	0.0212916	0.172575	0	0	profile_4
PIK3R6	24.8629	1.62102e-11	0.0183671	0.169975	0	0	profile_4
JAG2	25.2808	1.06795e-11	0.02088	0.168006	0	0	profile_4
FAM131B	10.0916	4.15458e-05	0.0117927	0.165839	4.86188e-05	0.0019469	profile_4
ADRB1	39.8699	5.06091e-18	0.0179936	0.162774	0	0	profile_4
RGS17	31.9036	1.43526e-14	0.0142379	0.161501	0	0	profile_4
AL158071.3	45.0753	2.81172e-20	0.0217042	0.161055	0	0	profile_4
RORB	25.5327	8.30381e-12	0.0147502	0.160744	0	0	profile_4
B3GAT1	19.6166	3.05731e-09	0.0193463	0.160477	1.4733e-06	8.19672e-05	profile_4
ARRB1	5.98534	0.00251791	0.0159423	0.155393	0.000374217	0.0125123	profile_4
PCBP3	21.0809	7.08159e-10	0.00972922	0.153998	1.4733e-06	8.19672e-05	profile_4
NCF4	213.851	4.82327e-93	0.0389818	0.152609	0	0	profile_4
NPM2	3.74394	0.0236702	0.0212312	0.152047	0.00106077	0.0309442	profile_4
PRSS57	3.10498	0.0448378	0.00650331	0.151618	0.00144088	0.040082	profile_4
AC139720.1	11.0972	1.5207e-05	0.0132043	0.147359	3.83057e-05	0.0016	profile_4
P3H3	9.6484	6.46989e-05	0.00905312	0.14409	5.89319e-05	0.00233236	profile_4
CBR3	37.8606	3.75787e-17	0.0245201	0.141023	0	0	profile_4
AC020571.1	21.9647	2.92926e-10	0.0235432	0.139992	1.4733e-06	8.19672e-05	profile_4
AL390957.1	12.0489	5.87521e-06	0.00970423	0.138532	2.65193e-05	0.00115756	profile_4
ELOVL6	25.3572	9.8948e-12	0.0172086	0.13688	0	0	profile_4
GOLIM4	63.3776	3.3473e-28	0.0184568	0.136771	0	0	profile_4
LINC00484	13.1746	1.90756e-06	0.0107499	0.136321	2.06262e-05	0.000945946	profile_4
CLECL1	288.304	6.32931e-125	0.0477361	0.13062	0	0	profile_4
SMPD3	104.29	6.92772e-46	0.0262351	0.129017	0	0	profile_4
LINC00996	4.12455	0.0161785	0.00771386	0.126476	0.000882505	0.0263297	profile_4
DOCK5	91.1419	3.30596e-40	0.0115138	0.124244	0	0	profile_4
PLEKHN1	24.632	2.04121e-11	0.00979589	0.124242	0	0	profile_4
ASPH	22.7144	1.38542e-10	0.0218286	0.120042	1.4733e-06	8.19672e-05	profile_4
COL9A2	20.6431	1.09661e-09	0.012845	0.119789	1.4733e-06	8.19672e-05	profile_4
AC011611.3	35.5247	3.86628e-16	0.00940225	0.116068	0	0	profile_4
APLP1	13.0189	2.22871e-06	0.00598209	0.109768	2.06262e-05	0.000945946	profile_4
DLC1	15.478	1.90949e-07	0.00810215	0.10902	7.36648e-06	0.0003663	profile_4
ITPRIPL2	11.4097	1.11284e-05	0.00992223	0.108316	3.68324e-05	0.0015625	profile_4
TIAF1	10.2289	3.62169e-05	0.00569258	0.10705	4.56722e-05	0.00184524	profile_4
SLC7A11	19.8928	2.3203e-09	0.00993072	0.103382	1.4733e-06	8.19672e-05	profile_4
SLAMF1	15.3167	2.24357e-07	0.0439616	0.102969	1.03131e-05	0.000503597	profile_4
CRACR2B	16.5833	6.3293e-08	0.0189062	0.100312	7.36648e-06	0.0003663	profile_4
CXCL13	803.202	0	0.509219	2.24326	0	0	profile_8
SNX9	108.755	8.51786e-48	0.824026	2.01729	0	0	profile_8
HAVCR2	668.657	3.93192e-285	0.556193	2.00593	0	0	profile_8
VCAM1	660.059	1.50481e-281	0.873059	1.77694	0	0	profile_8
AC243829.4	91.3632	2.7289e-40	0.516335	1.60752	0	0	profile_8
CTLA41	938.907	0	0.693135	1.51788	0	0	profile_8
TOX2	196.63	1.35715e-85	0.276199	1.26416	0	0	profile_8
TTN1	88.0323	7.48815e-39	0.508456	1.2218	0	0	profile_8
ENTPD11	252.695	1.33695e-109	0.210607	1.18915	0	0	profile_8
LAYN	85.3865	1.04031e-37	0.0894719	1.16072	0	0	profile_8
HMOX1	225.961	3.65529e-98	0.157916	1.15469	0	0	profile_8
CHN11	44.0982	7.50077e-20	0.31189	1.12074	0	0	profile_8
TNS3	140.447	1.88263e-61	0.083932	1.08385	0	0	profile_8
DRAIC	36.3476	1.70844e-16	0.164079	1.05855	0	0	profile_8
FXYD2	45.8318	1.33159e-20	0.130224	1.00608	0	0	profile_8
PDE7B	52.3707	1.96514e-23	0.0500957	0.95319	0	0	profile_8
AKAP5	62.2259	1.06864e-27	0.179929	0.918007	0	0	profile_8
LINC01480	71.664	8.85569e-32	0.0592693	0.875068	0	0	profile_8
IL10	53.9432	4.09954e-24	0.104042	0.855312	0	0	profile_8
TMEM1551	116.478	3.98405e-51	0.139544	0.847426	0	0	profile_8
GEM	116.4	4.30268e-51	0.134613	0.84258	0	0	profile_8
TSHZ2	52.579	1.59664e-23	0.0597465	0.803155	0	0	profile_8
HAPLN31	6.75004	0.00117252	0.17337	0.768246	0.000168594	0.00837037	profile_8
ETV7	17.7576	1.96015e-08	0.0848339	0.739974	0	0	profile_8
IKZF4	33.6205	2.59612e-15	0.0593537	0.693224	0	0	profile_8
MIR181A1HG1	75.6194	1.7275e-33	0.134371	0.661214	0	0	profile_8
SH3BGRL2	28.1026	6.39851e-13	0.0366242	0.650841	0	0	profile_8
ETV1	25.0393	1.3621e-11	0.100369	0.648204	0	0	profile_8
KIR2DL4	61.9776	1.36841e-27	0.0414759	0.64621	0	0	profile_8
CD381	239.471	6.04013e-104	0.283029	0.602239	0	0	profile_8
ESM1	37.8073	3.98254e-17	0.0392181	0.569265	0	0	profile_8
IQSEC31	3.9501	0.0192624	0.0427656	0.557214	0.000711675	0.0295356	profile_8
MAP10	26.6573	2.70809e-12	0.0228183	0.543911	0	0	profile_8
LINC016841	15.5142	1.84315e-07	0.0668006	0.533523	0	0	profile_8
CPA5	6.46612	0.00155731	0.0537827	0.52003	0.000195449	0.00956204	profile_8
CXCR61	265.326	5.36043e-115	0.439209	0.506623	0	0	profile_8
FAM174B	108.941	7.08216e-48	0.0406203	0.484263	0	0	profile_8
ACP51	21.521	4.5699e-10	0.192991	0.481041	0	0	profile_8
AGPAT51	40.5343	2.62289e-18	0.176157	0.474556	0	0	profile_8
ANKS1B	11.6931	8.38732e-06	0.0360708	0.46736	1.49198e-05	0.000881057	profile_8
PLS3	10.803	2.04133e-05	0.0239011	0.463626	1.79038e-05	0.00102564	profile_8
AC017002.3	16.6425	5.97146e-08	0.063913	0.459184	0	0	profile_8
TRIB11	14.9982	3.0866e-07	0.0944482	0.44731	0	0	profile_8
FLT1	12.4757	3.83735e-06	0.0286206	0.439171	8.95188e-06	0.000550459	profile_8
AC245595.11	11.1707	1.41361e-05	0.04916	0.436958	1.79038e-05	0.00102564	profile_8
LINC01572	3.76585	0.0231582	0.0279204	0.436498	0.000795226	0.032303	profile_8
MS4A6A	2.68292	0.068379	0.0557796	0.436456	0.00134427	0.049235	profile_8
CYSLTR1	2.73236	0.065081	0.0271087	0.425855	0.00130399	0.0481543	profile_8
MYL6B1	70.5985	2.55798e-31	0.0888694	0.424423	0	0	profile_8
SMCO4	8.15254	0.00028861	0.0302673	0.413098	7.9075e-05	0.0040613	profile_8
GSTM2	4.86638	0.00770697	0.0844247	0.412392	0.000435658	0.0192739	profile_8
GLDC	16.9031	4.60285e-08	0.0210594	0.405199	0	0	profile_8
MYO1E1	94.858	8.45511e-42	0.0364184	0.404216	0	0	profile_8
AL122035.1	22.2012	2.31706e-10	0.0347023	0.403461	0	0	profile_8
TNFSF4	247.472	2.28625e-107	0.0841808	0.398229	0	0	profile_8
BEND41	32.7093	6.44547e-15	0.0398782	0.396409	0	0	profile_8
CAMK1	135.333	2.99514e-59	0.0699009	0.395522	0	0	profile_8
NBL11	7.12675	0.000804623	0.146782	0.392964	0.000138754	0.00696629	profile_8
HSPA12A	11.2864	1.25926e-05	0.0189456	0.388837	1.79038e-05	0.00102564	profile_8
PHEX	49.648	2.96505e-22	0.0168543	0.387189	0	0	profile_8
ARMCX1	6.66745	0.00127343	0.0154813	0.384247	0.000176054	0.00870849	profile_8
MCTP11	8.78575	0.000153271	0.026113	0.381771	4.77434e-05	0.00253968	profile_8
CD79A	45.2077	2.48113e-20	0.0269667	0.381221	0	0	profile_8
BFSP2-AS11	24.1657	3.25825e-11	0.016879	0.379275	0	0	profile_8
CD101	21.2182	6.18383e-10	0.0818892	0.371021	0	0	profile_8
TRPM2	10.0778	4.21375e-05	0.0388197	0.37027	2.53637e-05	0.00141667	profile_8
APP1	21.1338	6.72756e-10	0.0614407	0.368739	0	0	profile_8
BSPRY	6.36742	0.00171878	0.0251314	0.363726	0.000202909	0.00989091	profile_8
FBXO2	23.6518	5.44318e-11	0.0782316	0.359885	0	0	profile_8
CEP55	11.5598	9.58289e-06	0.0271181	0.349905	1.49198e-05	0.000881057	profile_8
MIR155HG1	164.455	8.87546e-72	0.201329	0.348309	0	0	profile_8
MYO7A	70.8893	1.91501e-31	0.0266291	0.347824	0	0	profile_8
REEP2	18.3788	1.05395e-08	0.0261994	0.346493	0	0	profile_8
AC011611.31	22.1299	2.48801e-10	0.0277593	0.346001	0	0	profile_8
DIXDC1	3.14143	0.0432345	0.0309833	0.343832	0.00107572	0.0416763	profile_8
CHKB-CPT1B	2.73914	0.064641	0.0169375	0.337837	0.00130101	0.0481543	profile_8
PMCH	28.5506	4.0912e-13	0.0251606	0.337115	0	0	profile_8
AC243960.3	11.2565	1.29756e-05	0.0144046	0.334009	1.79038e-05	0.00102564	profile_8
AL138720.1	44.2077	6.72527e-20	0.0254653	0.332445	0	0	profile_8
RUNX21	149.068	3.67072e-65	0.0975854	0.327422	0	0	profile_8
TSHR	67.6257	4.93557e-30	0.0237534	0.325247	0	0	profile_8
GSEC	4.99993	0.00674375	0.0221818	0.317358	0.000410295	0.0184564	profile_8
ATAD3C	8.55864	0.000192327	0.0181983	0.315891	5.66953e-05	0.00298039	profile_8
SIGLEC10	10.676	2.31758e-05	0.0241082	0.314306	1.93957e-05	0.00109244	profile_8
LMCD11	26.968	1.98594e-12	0.0484258	0.309688	0	0	profile_8
SNED1	2.84192	0.0583287	0.0187287	0.307726	0.00125028	0.0464266	profile_8
STARD13	15.3132	2.25306e-07	0.0165162	0.305906	0	0	profile_8
LRP5	8.74224	0.000160083	0.0213179	0.296698	4.92354e-05	0.0026087	profile_8
PRRG4	81.775	3.7787e-36	0.0397553	0.295786	0	0	profile_8
CLIP31	31.3736	2.44424e-14	0.0272362	0.295111	0	0	profile_8
RASSF4	23.6632	5.38158e-11	0.0431057	0.294543	0	0	profile_8
PHLDA11	214.442	3.13666e-93	0.167607	0.29105	0	0	profile_8
C1QA1	13.2388	1.79003e-06	0.0402022	0.2887	4.47594e-06	0.000287081	profile_8
IQCJ-SCHIP1	16.5543	6.52115e-08	0.0135894	0.282605	0	0	profile_8
RNASE1	10.8639	1.9209e-05	0.0261145	0.281509	1.79038e-05	0.00102564	profile_8
IRF5	4.32574	0.0132316	0.0295455	0.274037	0.000583364	0.0249045	profile_8
KIF4A	14.4635	5.26584e-07	0.0152238	0.27372	0	0	profile_8
BASP1	6.32722	0.00178927	0.0179339	0.267407	0.000205893	0.01	profile_8
KIF71	11.9153	6.71762e-06	0.014034	0.260272	1.34278e-05	0.000810811	profile_8
CNKSR2	5.89031	0.00276916	0.0283626	0.258529	0.000256621	0.012242	profile_8
PKIA1	45.3318	2.19223e-20	0.0545999	0.257573	0	0	profile_8
AC092580.2	7.30083	0.000676119	0.0114821	0.256523	0.00012085	0.00611321	profile_8
CRACR2B1	17.4898	2.5615e-08	0.0462528	0.254535	0	0	profile_8
NINL	6.94352	0.000966341	0.0187962	0.252386	0.00015069	0.00750929	profile_8
CCDC50	100.719	2.49631e-44	0.0447466	0.247506	0	0	profile_8
TIAM11	5.84243	0.00290493	0.0451431	0.24692	0.000262589	0.0124823	profile_8
MZB1	27.205	1.56755e-12	0.0430637	0.241119	0	0	profile_8
NHS1	36.5597	1.38259e-16	0.0188679	0.235615	0	0	profile_8
ESR1	8.31295	0.000245856	0.0222231	0.234307	7.01231e-05	0.00362934	profile_8
GPR251	96.0735	2.52573e-42	0.0320572	0.230155	0	0	profile_8
DAPK2	49.2649	4.34373e-22	0.0399952	0.220309	0	0	profile_8
JSRP1	5.89723	0.00275009	0.0169469	0.219482	0.000255129	0.012242	profile_8
GNG4	16.0573	1.07141e-07	0.00938651	0.218328	0	0	profile_8
BRSK1	8.45931	0.000212399	0.0177167	0.213516	6.26632e-05	0.00326848	profile_8
AC079341.11	44.1545	7.0919e-20	0.0258602	0.213294	0	0	profile_8
ITGA21	110.936	9.76424e-49	0.0262942	0.210813	0	0	profile_8
CCNA21	12.3668	4.27843e-06	0.0372812	0.209047	8.95188e-06	0.000550459	profile_8
CD1631	2.85655	0.0574813	0.0108233	0.20682	0.00123387	0.0460724	profile_8
LEAP2	3.08217	0.0458733	0.0102975	0.200177	0.00110854	0.0425788	profile_8
KCNQ3	11.3044	1.23688e-05	0.0105108	0.197695	1.79038e-05	0.00102564	profile_8
ST6GALNAC3	3.27552	0.0378102	0.0135356	0.188943	0.00102051	0.0397674	profile_8
ATP8B4	19.1256	4.99912e-09	0.0165199	0.188322	0	0	profile_8
RTKN	3.08106	0.0459245	0.00839386	0.180779	0.00110854	0.0425788	profile_8
MIR4435-2HG1	74.7283	4.19345e-33	0.112414	0.180255	0	0	profile_8
TRO	9.32651	8.92786e-05	0.0121939	0.17761	3.28236e-05	0.00176707	profile_8
AC112721.2	2.96846	0.0513969	0.00919309	0.17486	0.00116225	0.0440113	profile_8
KIF14	3.08947	0.04554	0.0121675	0.171891	0.00110108	0.042536	profile_8
DRAXIN	5.29012	0.00504562	0.0135287	0.171556	0.000344648	0.0158219	profile_8
GALNT21	182.696	1.29543e-79	0.0800017	0.168162	0	0	profile_8
PRR19	6.51323	0.00148568	0.0117911	0.167525	0.000192465	0.00945055	profile_8
LINC00158	39.9443	4.72427e-18	0.0115477	0.166039	0	0	profile_8
STAP11	36.4553	1.53445e-16	0.0100585	0.164918	0	0	profile_8
GOLIM41	55.401	9.5901e-25	0.0218387	0.163195	0	0	profile_8
SLAMF8	12.0889	5.64769e-06	0.011075	0.15997	1.19358e-05	0.000730594	profile_8
SHCBP1	4.68984	0.00919453	0.0104697	0.156244	0.000468482	0.0203896	profile_8
MKI671	15.051	2.92797e-07	0.0251796	0.15565	0	0	profile_8
KIR2DL1	3.03608	0.0480367	0.00837114	0.15515	0.00112794	0.0429462	profile_8
TMPRSS3	4.19239	0.0151186	0.0100509	0.1536	0.000626632	0.026395	profile_8
MAST4	50.8679	8.78864e-23	0.0252524	0.143459	0	0	profile_8
ITGAD	43.1736	1.88602e-19	0.0102839	0.138573	0	0	profile_8
COL9A21	21.6068	4.19492e-10	0.0144843	0.138266	0	0	profile_8
IFITM10	4.98432	0.00684981	0.0068558	0.133689	0.000413279	0.0185284	profile_8
CLECL11	154.179	2.32313e-67	0.0460449	0.131042	0	0	profile_8
SOX41	68.808	1.52079e-30	0.0378686	0.129621	0	0	profile_8
EVC	6.57996	0.00138981	0.00550957	0.119142	0.00018053	0.00889706	profile_8
CD200	24.7491	1.81977e-11	0.00633386	0.118031	0	0	profile_8
E2F7	3.89819	0.0202884	0.00800743	0.11767	0.000725103	0.029816	profile_8
FSD1	4.87017	0.0076778	0.00742075	0.114968	0.000434166	0.0192715	profile_8
AP002884.11	17.775	1.92638e-08	0.00901932	0.112974	0	0	profile_8
MPZL21	4.77205	0.00846914	0.00523282	0.109401	0.000453562	0.0198693	profile_8
AP003486.1	7.43926	0.00058875	0.00455951	0.107559	0.000114883	0.00583333	profile_8
CXCL81	19.1502	4.87797e-09	0.0147671	0.106119	0	0	profile_8
GNB4	3.67543	0.0253494	0.00918099	0.105367	0.000825065	0.0333133	profile_8
CPM	10.5799	2.5513e-05	0.0069032	0.101569	1.93957e-05	0.00109244	profile_8
ASPH1	5.40317	0.00450647	0.0180786	0.101115	0.000320776	0.0148789	profile_8
TTYH3	9.31764	9.00731e-05	0.014227	0.100749	3.28236e-05	0.00176707	profile_8
